# Supplementary material for: Enzymatic Control over Reactive Intermediates Enables Direct Oxidation of Alkenes to Carbonyls by a P450 Iron-Oxo Species
Source: PubMed Central journal article supplement (PMC9460782; doi:10.1021/jacs.2c02567), 2022-08-23
Supplement: ja2c02567_si_001.pdf [file ja2c02567_si_001.pdf]

## Supplementary information

### **Enzymatic control over reactive intermediates enables direct oxidation of alkenes to carbonyls by a P450 iron-oxo species**

**Authors:** Jordi Soler,<sup>a,‡</sup> Sebastian Gergel,<sup>b,‡</sup> Cindy Klaus,<sup>b</sup> Stephan C. Hammer,<sup>b,\*</sup> Marc Garcia-Borràs<sup>a,\*</sup>

#### **Affiliations:**

<sup>a</sup> Institut de Química Computacional i Catàlisi (IQCC) and Departament de Química, Universitat de Girona, Carrer Maria Aurèlia Capmany 69, Girona 17003, Catalonia, Spain

<sup>b</sup> Chair of Organic Chemistry and Biocatalysis, Faculty of Chemistry, Bielefeld University, Universitätsstraße 25, 33615 Bielefeld, Germany

<sup>‡</sup> both authors contributed equally

\* Email: marc.garcia@udg.edu, stephan.hammer@uni-bielefeld.de

#### **Table of Contents**

|                                                                                                                                   |     |
|-----------------------------------------------------------------------------------------------------------------------------------|-----|
| <b>A. Computational Modelling Section</b> .....                                                                                   | 3   |
| I. Computational Methods.....                                                                                                     | 3   |
| II. Exploration of the intrinsic oxidation mechanisms using DFT calculations on an enzyme-free computational truncated model..... | 8   |
| III. Quasiclassical direct dynamics trajectory simulations.....                                                                   | 22  |
| IV. Computational modelling of the enzyme-substrate bound complexes.....                                                          | 26  |
| V. Computational modelling of the enzymatic reaction mechanisms using QM/MM calculations .....                                    | 43  |
| VI. Local Electric Field characterization in the active site cavity and its impact on the reactive intermediates .....            | 99  |
| VII. Absolute energies of the characterized stationary points.....                                                                | 122 |
| <b>B. Experimental Section</b> .....                                                                                              | 129 |
| I. Materials and Methods.....                                                                                                     | 129 |
| II. General procedures.....                                                                                                       | 133 |
| III. Chemical synthesis of <i>d</i> -labeled styrenes .....                                                                       | 136 |
| IV. Determination of the migration tendency ( <i>cis</i> vs. <i>trans</i> ).....                                                  | 139 |
| V. MS spectra from isotopic labeling experiment.....                                                                              | 142 |
| VI. Chemical and enzymatic synthesis of isotopically labeled 2-phenylethan-2- <i>d</i> -1-ol.....                                 | 144 |
| VII. NMR-analysis to determine the enantioselectivity .....                                                                       | 147 |
| VIII. Enantioselectivity in epoxidation as a function of evolution.....                                                           | 153 |

|                                                                                                 |            |
|-------------------------------------------------------------------------------------------------|------------|
| IX. UV/Vis spectroscopic analysis of substrate binding.....                                     | 154        |
| X. Michealis-Menten kinetics .....                                                              | 155        |
| XI. Coupling efficiencies.....                                                                  | 156        |
| <b>C. Optimized structures (cartesian coordinates) of characterized stationary points .....</b> | <b>157</b> |
| <b>D. References.....</b>                                                                       | <b>211</b> |

## A. Computational Modelling Section

### I. Computational Methods

#### Density Functional Theory (DFT) calculations

All Density Functional Theory (DFT) calculations were performed using Gaussian09 software package.<sup>1</sup> A computational truncated model has been used [Fe=O(Por)(SCH<sub>3</sub>)(**1**)], which includes: the iron-oxo active species of Cpd I (Fe=O), a porphyrin pyrrole core (Por), a methanethiolate group to mimic the Cys axial ligand, and the styrene (**1**) substrate. The resulting model has a neutral total charge and two different electronic states have been considered: doublet and quartet, both energetically accessible. The unrestricted hybrid (U)B3LYP<sup>2-4</sup> functional was used with an *ultrafine* integration grid,<sup>5</sup> and including the CPCM polarizable conductor model (dichloromethane,  $\epsilon = 8.9$ )<sup>6,7</sup> to have an estimation of the dielectric permittivity in the enzyme active site.<sup>8-10</sup> 6-31G(d) basis set was used for all atoms but Fe, where SDD basis set and related SDD pseudopotential were employed. All optimized stationary points were characterized as minima using frequency calculations, including transition states which show a single imaginary frequency that describes the corresponding reaction coordinate. IRC calculations were performed to ensure that optimized transition states connect the expected reactants and products. Enthalpies and entropies were obtained at 1 atm and 298.15 K. Enthalpy calculations were corrected using the harmonic oscillator approximation, as discussed by Truhlar and co-workers,<sup>11,12</sup> by increasing all frequencies below 100 cm<sup>-1</sup> to 100 cm<sup>-1</sup> using Goodvibes v.3.0.1 python script.<sup>13</sup> Single point energy calculations were carried out with the previously described DFT functional (U)B3LYP, with an ultrafine grid and CPCM dichloromethane conductor model), Def2TZVP basis set for all atoms, and including Empirical Grimme D3 dispersion corrections with Becke-Johnson (GD3BJ) damping.<sup>14</sup> The Shaik group and others have demonstrated that DFT calculations based on B3LYP functional provide qualitative good descriptions and relative energy differences of species involving thiolate model of cytochrome P450 compound I as compared to CASSCF and CASPT2 higher level methods.<sup>15-18</sup> Calculations in the presence of an oriented electric field (optimizations and/or single point calculations) were performed using the Gaussian09 IOp(3/14= -6) to define the components of the electric field vector, including the *nosymm* keyword. Gaussian09 in combination with the code developed by Harvey et al.<sup>21</sup> and the easyMECP python script.<sup>22</sup> Optimized structures showed in figures were rendered using CYLview,<sup>19</sup> and molecular orbitals and spin density isosurfaces were represented using PyMOL,<sup>20</sup> using Gaussian09 generated cube files. The minimum energy crossing points (MECP) were optimized and evaluated using

### Direct quasiclassical dynamics trajectory simulations

Direct quasiclassical trajectory (QCT) simulations were performed in vacuum at 298.15 K using the same truncated model early described, [Fe=O(Por)(SCH<sub>3</sub>)(**1**)], which includes: the iron-oxo active species of Cpd I (Fe=O), a porphyrin pyrrole core (Por), a methanethiolate group to mimic the Cys axial ligand (SCH<sub>3</sub>), and the styrene (**1**) substrate. Quantum mechanical forces and normal-mode sampling for DFT optimized **TS1** structures were obtained with Gaussian09<sup>1</sup> using the unrestricted hybrid (U)B3LYP<sup>2-4</sup> functional with an *ultrafine* integration grid.<sup>5</sup> 6-31G(d) basis set was used for all atoms but Fe, where SDD basis set and related SDD pseudopotential were employed. QCT were initialized in the vicinity of the rate-limiting transition state **TS1** leading to O-C1 bond formation with the normal mode sampling method. The sampled **TS1** geometries constitute a quantum mechanical Boltzmann distribution.<sup>23,24</sup> Zero-point energy and thermal energy were added in real normal vibration modes on each sampled **TS1** geometry. Both doublet (d) and quartet (q) electronic states were considered by performing 20 independent trajectories for each electronic state (40 trajectories in total). The QCT were carried out using the velocity-Verlet algorithm as implemented in Singleton's ProgDyn program,<sup>25-27</sup> and were propagated forward and reverse for 600 fs with a 1 fs step size in each direction. A trajectory was terminated when either the simulation reaches 600 fs in one direction or the geometric criterion for reactant (**1**), epoxide (**2**), or carbonyl (**3**) formation is fulfilled.

### Homology modelling

The initial homology model for the heme domain of P450<sub>LAI</sub> enzyme was generated using Swiss-Model<sup>28</sup> and taking as a template the recently solved structure of P450<sub>TT</sub>, which has 56% of sequence identity for the heme domain (PDB: 6GII) and 60% for the full protein chain (PDB: 6KBH). The initial homology model was further refined by performing extensive MD simulations, 5 independent replicas of 1,000 ns (1  $\mu$ s) each, accumulating a total of 5  $\mu$ s of simulation time. Analysis of the conformational landscape of the enzyme explored during the accumulated simulation time was carried out performing clustering in terms of protein backbone C $\alpha$  RMSD, using Cpptraj<sup>29</sup> module from Ambertools. A representative structure of the most populated cluster was selected as starting point for further modelling. This structure was also used as a starting point to generate the intermediate P7 variant and the evolved aMOx variant. To do so, 5 (T121A, N201K, N209S, Y385H, E418G) and 12 (A103L, M118L, R120H, T121A, V123I, N201K, N209S, I326V, V327M, Y385V, M391L, E418G) additional mutations were introduced using RosettaDesign<sup>30</sup> for P7 and aMOx variants, respectively. The models obtained from RosettaDesign were refined by extensive MD simulations, 5 independent replicas of 1,000 ns (1  $\mu$ s) each, accumulating a total of 5  $\mu$ s of simulation time per variant. Equivalent clustering analysis as described for WT P450<sub>LAI</sub> system was carried out to obtaining an accurate P7 and aMOx structure that were used for further modelling.

## Molecular Dynamics simulations

Molecular Dynamics (MD) simulations in explicit water were performed using the AMBER18 package.<sup>31,32</sup> Parameters for the heme compound I (Cpd I) and the axial Cys were taken from reference<sup>33</sup>. The enzyme variants (P450<sub>LAI</sub>, P7, and aMOx) were solvated in a pre-equilibrated cubic box with a 10-Å buffer of TIP3P<sup>34</sup> water molecules using the AMBER18 leap module, resulting in the addition of ~16,500 solvent molecules. Explicit counterions (Na<sup>+</sup> or Cl<sup>-</sup>) were introduced to neutralize the system. All subsequent calculations were done using the Stony Brook modification of the Amber14 force field (ff14SB).<sup>35</sup> A two-stage geometry optimization approach was used. The first stage minimizes the positions of solvent molecules and ions imposing positional restraints on solute by a harmonic potential with a force constant of 500 kcal mol<sup>-1</sup> Å<sup>-2</sup>, and the second stage is an unrestrained minimization of all the atoms in the simulation cell. The system was gently heated using six 50 ps steps, incrementing the temperature by 50 K for each step (0–300 K) under constant-volume and periodic-boundary conditions. Water molecules were treated using the SHAKE algorithm, where the angle between the hydrogen atoms was kept fixed. Long-range electrostatic effects were modelled using the particle-mesh-Ewald method.<sup>36</sup> An 8 Å cutoff was applied to Lennard–Jones and electrostatic interactions. Harmonic restraints of 30 kcal·mol<sup>-1</sup> were applied to the solute, and the Langevin scheme was used to control and equalize the temperature. The time step was kept at 1 fs during the heating stages, allowing potential inhomogeneities to self-adjust. Each system was then equilibrated for 2 ns with a 2 fs time step at a constant pressure of 1 atm and temperature of 300 K without restraints. Once the systems were equilibrated in the NPT ensemble, production trajectories were then run under the NVT ensemble and periodic-boundary conditions. In particular, a total of 5,000 ns (5.0 μs) in the *holo* state were accumulated for P450<sub>LAI</sub>, P7, and aMOx variants: 5 independent replicas of 1,000 ns each (5 x 1 μs for each system). Cpptraj<sup>29</sup> module from AmberTools utilities was used to process and analyze the trajectories, including clusterization analyses. POVME3.0 was used to analyze active site volumes.<sup>37</sup> VMD software was used to visualize MD simulations.<sup>38</sup> Protein structures were rendered using PyMOL.<sup>20</sup>

## Docking, substrate-bound and intermediate-bound MD simulations

Parameters for styrene (**1**) substrate were generated within the Antechamber<sup>39</sup> module in AMBER18 package using the general AMBER force field (gaff2),<sup>40</sup> with partial charges set to fit the electrostatic potential generated at the HF/6-31G(d) level by the RESP model.<sup>41</sup> The charges were calculated according to the Merz–Singh–Kollman scheme<sup>42,43</sup> using the Gaussian09 package.<sup>1</sup> The most representative structures from the previous *holo* state simulations were characterized by clustering of the accumulated simulation time, considering the protein backbone RMSD. These structures were used for docking calculations with substrate **1**, which were performed using AutoDock Vina.<sup>44</sup> Docking results were used as starting points for substrate-bound restrained-MD simulations, in which the distance between the center of mass of the alkene in styrene (**1**) substrate (defined by C1 and C2 atoms) and the oxygen atom from Cpd I was kept restrained during the MD simulation (2.8–3.0 and 3.2–3.4 Å, using a 100 kcal·mol<sup>-1</sup>·Å<sup>-2</sup> force constant). This allowed to explore catalytically relevant binding poses of the substrate, where it is in a near attack conformation to make the oxidation reaction happen,

largely refining the docking predictions and preventing undesired unbinding events during the simulations. The same protocol previously described for MD simulations was applied. A total of 5 independent replicas of 500 ns of production trajectories were performed for P450<sub>LA1</sub>, P7, and aMO<sub>x</sub>, accumulating a total of 2.5  $\mu$ s of substrate restrained-MD simulation time for each system.

Parameters for the covalent radical intermediate-bound structure were generated using the Metal Center Parameter Builder (MCPB.py)<sup>45</sup> in AMBER18 package. The coordination sphere of the metal center includes Cys390, heme cofactor, and the covalent radical intermediate in quartet electronic state (**Int1**<sup>9</sup>). The same protocol previously described for MD simulations was applied. A total of 2 independent replicas of 500 ns of production trajectory each were accumulated for P450<sub>LA1</sub> and aMO<sub>x</sub>, accumulating a total of 1.0  $\mu$ s of intermediate-bonded MD simulation time for each system. Intermediate-bound MD simulations were used to explore the conformational flexibility of such intermediate when formed in the enzymatic active sites. Representative structures obtained from intermediate-bound simulations that describe the catalytically relevant binding modes characterized from substrate-bound restrained-MD simulations, were used as a starting point for subsequent QM/MM calculations.

### **Quantum Mechanics / Molecular Mechanics (QM/MM) calculations**

Initial structures for QM/MM modelling were selected from intermediate-bound MD simulations on P450<sub>LA1</sub> and aMO<sub>x</sub> variant, which describe the catalytically binding modes characterized from substrate-bound restrained-MD simulations. All water molecules and counterions beyond 3 Å from any residue of the protein, cofactors or substrates were removed and the 4 resulting structures had *ca.* 10350 atoms each, respectively.

The QM region included the heme porphyrin pyrrole core, the C390 cysteine sidechain, the iron center, and the styrene molecule (50 QM atoms and 9 H-link atoms). The resulting QM region has a neutral charge and both doublet and quartet energetically accessible electronic states are considered. All residues and water molecules inside a 12 Å shell around the QM region were considered as active (active region), thus resulting in more than 2,600 MM atoms free to move during the optimization procedures.

QM/MM calculations were carried out using the ONIOM<sup>46</sup> approach as implemented in Gaussian09.<sup>1</sup> Geometry optimizations were performed with the hybrid (U)B3LYP<sup>2-4</sup> functional using an *ultrafine* integration grid and with 6-31G(d) basis set on all atoms except for iron, where an SDD basis set and related SDD pseudopotential was used. The MM parameters and MM charges were identical to those used in the intermediate-bound MD simulations. A two-step sequential optimization protocol using QuadMacro<sup>47</sup> optimization algorithm has been used: *i*) a first optimization using a Mechanical Embedding (ME) scheme was initially performed, and once optimized, *ii*) all MM water molecules were kept frozen and a second optimization was performed within the Electrostatic Embedding scheme (EE). This protocol permits to optimize the solvent molecules by including polarization on the QM region without losing control on the microiteration cycles performed during EE optimizations.<sup>48</sup> The use of an electrostatic embedding scheme allows to account for the polarizing effect of the enzyme environment on the QM region. Stationary points were verified as minima or saddle point (transition state) geometries after vibrational frequency analysis, having all frequencies positive

(minima) or only one imaginary frequency (transition states). Thermal corrections were obtained at 1 atm and 298.15 K. Single point energy calculations on the optimized structures were performed at the (U)B3LYP/Def2TZVP theory level within the EE scheme. MolUP VMD extension<sup>49</sup> was used for input preparation and output visualization and PyMOL was used for image rendering.<sup>20</sup>

### Local Electric Field (LEF) calculations

QM/MM optimized quartet covalent radical intermediates in both P450<sub>LA1</sub> and aMOx variants (LA1-**Int1**<sup>9</sup> and aMOx-**Int1**<sup>9</sup>) were used as starting points for calculating the local electric field (LEF) generated in the enzyme active site using TITAN 2.0 software.<sup>50</sup> All ‘non-residue’ molecules including solvent molecules and counterions, the heme cofactor, the axial C390 sidechain, the Fe-oxo moiety, and the former substrate were removed. This protocol is equivalent to the one used by Alexandrova and co-workers,<sup>51</sup> and accounts for the LEF generated by the protein scaffold in the P450 active site cavity. The atomic charges used were obtained from the *ff14SB* forcefield<sup>35</sup>. The local electric field was calculated at the position where the catalytic oxygen atom (bound to Fe) was placed, since it is centered in the active site cavity. The electric field convention used by TITAN 2.0 is that the direction of the field is defined from positive to negative (i.e. a free positive charge will follow the direction of the electric field vector). This is the general convention for electric field vector representation, despite Gaussian09 package uses the opposite (i.e. negative to positive).<sup>52</sup>

For visual representation of the electric field orientation and direction in the enzyme active site, the units of the computed electric field vector were transformed to Å. To do so, the atomic units of the field were first converted to  $\text{V} \cdot \text{Å}^{-1}$  (1 a.u. =  $51.4 \text{ V} \cdot \text{Å}^{-1}$ ) and the resulting value was then multiplied by the arbitrary value of  $10 \text{ Å}^2 \cdot \text{V}^{-1}$  to directly obtain Å. This transformation results into a scaled electric field vector that can be properly represented in the active site of the enzymes. PyMOL software was used for image rendering.<sup>20</sup>

## ii. Exploration of the intrinsic oxidation mechanisms using DFT calculations on an enzyme-free computational truncated model.

**Figure S1:** Intrinsic reaction mechanism studies by means of DFT truncated model.

**A)** Proposed catalytic cycle for epoxidation and anti-Markovnikov oxidation mechanisms catalyzed by P450 enzymes.

**B)** DFT calculated reaction mechanism for styrene (**1**) oxidation using a truncated computational model based on P450 active site (iron-oxo species coordinated to the porphyrin pyrrole core and a methanethiolate as axial ligand). Quasi-harmonic corrected Gibbs energies ( $\Delta G$ ) and relative electronic energies ( $\Delta E$ , in parenthesis) of the lowest in energy electronic state (doublet (d) or quartet (q)) are reported. Energy values were obtained at the (U)B3LYP/Def2TZVP/PCM(dichloromethane)//(U)B3LYP/6-31G(d)+SDD(Fe)/PCM(dichloromethane) level. All energies are referred considering the lowest in energy reactant complex in the quartet electronic state **1<sup>q</sup>** as zero.

**C)** Optimized geometries for the stationary points reported in B). Mulliken charges ( $q$ ) and spin density ( $\rho$ ) for the phenyl group (sum of all C and H atoms), C2 benzylic position, C1 and O, are reported for the optimized transition states and intermediates. Values are given in a.u.

**D)** Intrinsic Reaction Coordinate calculations (IRC) starting from **TS1<sup>d</sup>** (conformer 1 and conformer 2) followed by an optimization starting from the last structure of the IRC calculation, at the (U)B3LYP/6-31G(d)+SDD(Fe)/PCM(dichloromethane) level. The structure of the last point of the IRC and the optimization are provided as insets.

Distances, angles, and energy values are given in Angstrom ( $\text{\AA}$ ), degrees ( $^\circ$ ), and  $\text{kcal}\cdot\text{mol}^{-1}$ , respectively.



A)

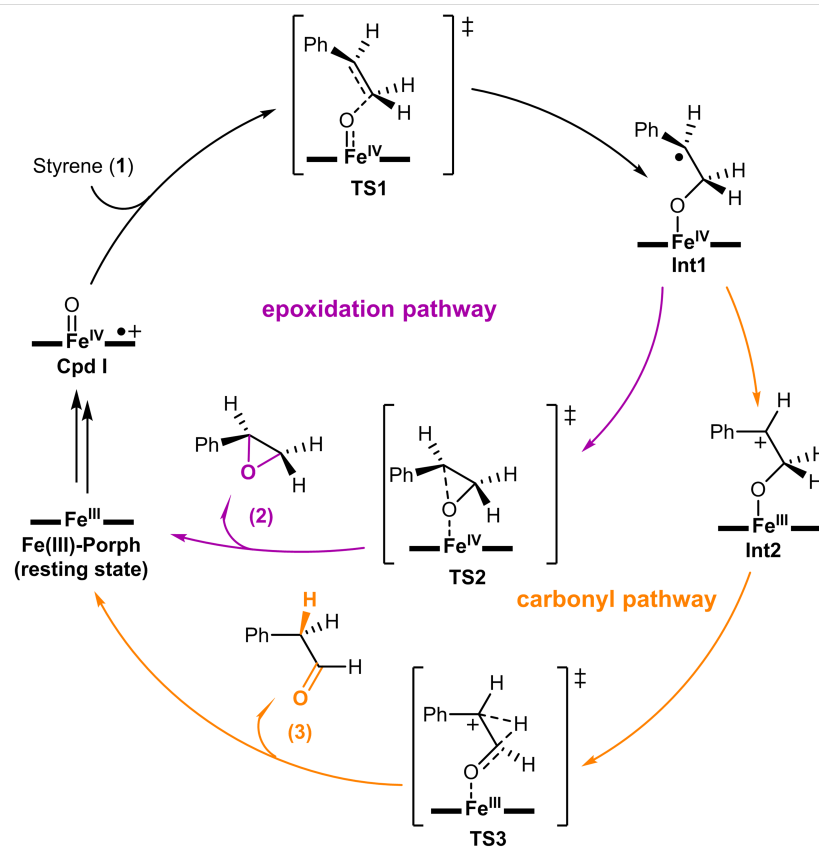

B)

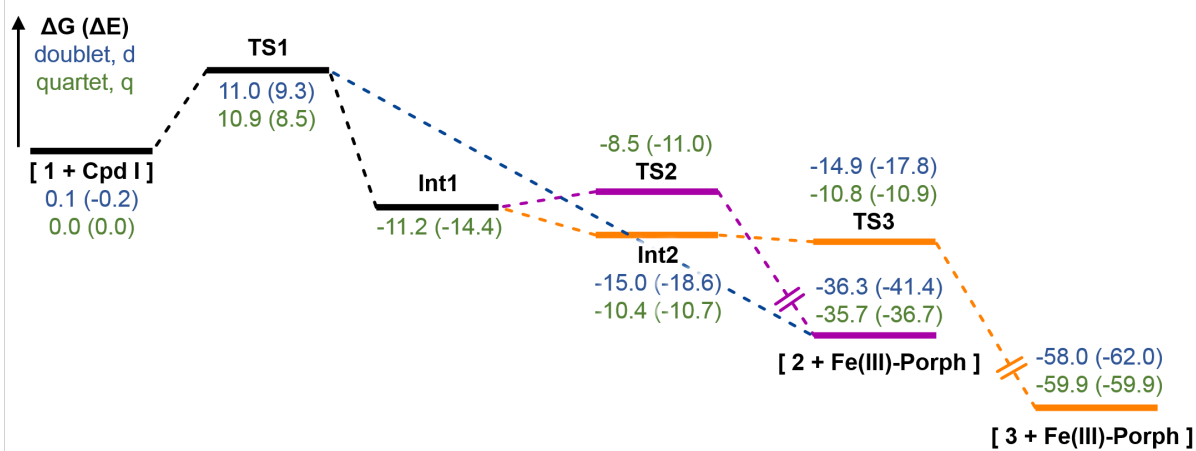

C)

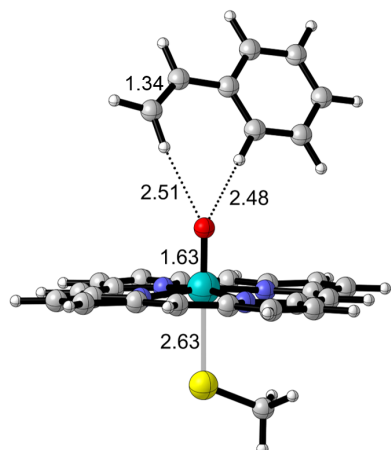

**[1 + Cpd I]<sup>d</sup>**  
(reactant complex)  
 $\Delta G = 0.1$  ( $\Delta E = -0.2$ )

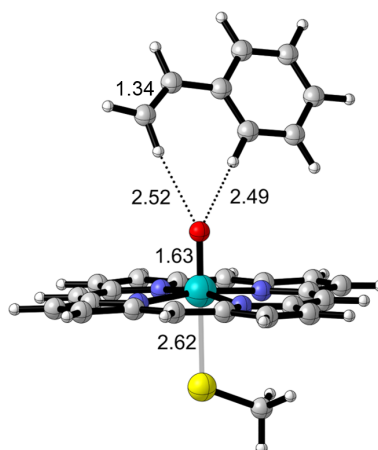

**[1 + Cpd I]<sup>q</sup>**  
(reactant complex)  
 $\Delta G = 0.0$  ( $\Delta E = 0.0$ )

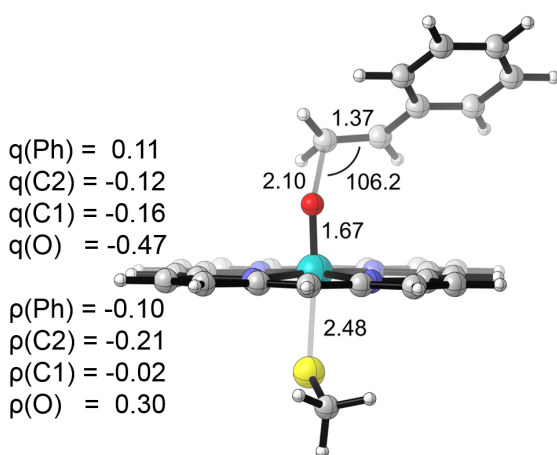

$q(\text{Ph}) = 0.11$   
 $q(\text{C}2) = -0.12$   
 $q(\text{C}1) = -0.16$   
 $q(\text{O}) = -0.47$   
 $\rho(\text{Ph}) = -0.10$   
 $\rho(\text{C}2) = -0.21$   
 $\rho(\text{C}1) = -0.02$   
 $\rho(\text{O}) = 0.30$

**TS1<sup>d</sup>**  
(conformer 1)  
 $\Delta G^\ddagger = 10.9$  ( $\Delta E^\ddagger = 9.5$ )  
 $|\angle \text{Fe-O-C}1\text{-C}2| = 77.0^\circ$

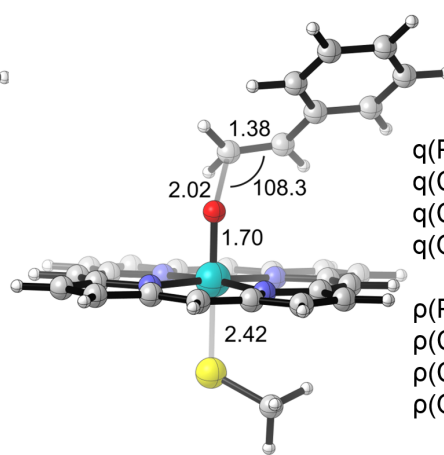

$q(\text{Ph}) = 0.07$   
 $q(\text{C}2) = -0.14$   
 $q(\text{C}1) = -0.16$   
 $q(\text{O}) = -0.44$   
 $\rho(\text{Ph}) = 0.13$   
 $\rho(\text{C}2) = 0.33$   
 $\rho(\text{C}1) = -0.06$   
 $\rho(\text{O}) = 0.75$

**TS1<sup>q</sup>**  
(conformer 1)  
 $\Delta G^\ddagger = 10.9$  ( $\Delta E^\ddagger = 8.5$ )  
 $|\angle \text{Fe-O-C}1\text{-C}2| = 85.0^\circ$

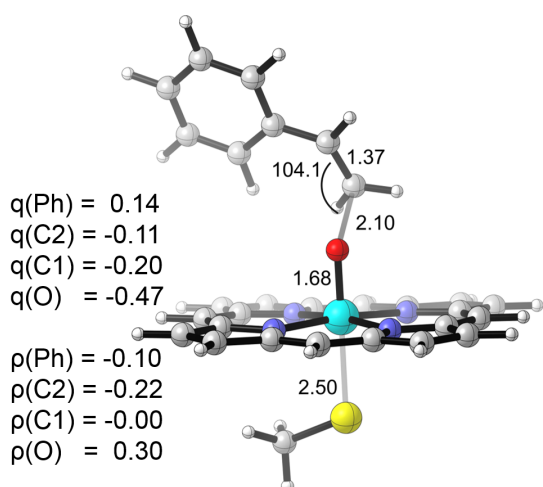

$q(\text{Ph}) = 0.14$   
 $q(\text{C}2) = -0.11$   
 $q(\text{C}1) = -0.20$   
 $q(\text{O}) = -0.47$   
 $\rho(\text{Ph}) = -0.10$   
 $\rho(\text{C}2) = -0.22$   
 $\rho(\text{C}1) = -0.00$   
 $\rho(\text{O}) = 0.30$

**TS1<sup>d</sup>**  
(conformer 2)  
 $\Delta G^\ddagger = 11.2$  ( $\Delta E^\ddagger = 10.4$ )  
 $|\angle \text{Fe-O-C}1\text{-C}2| = 160.0^\circ$

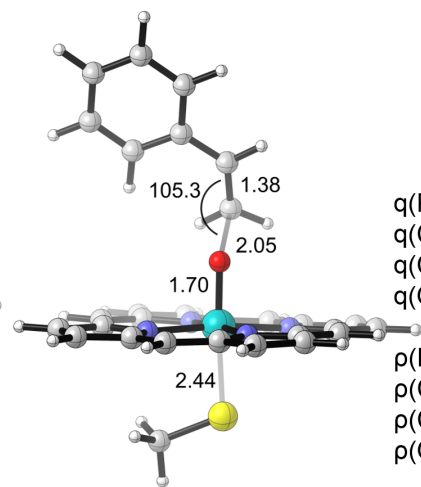

$q(\text{Ph}) = 0.11$   
 $q(\text{C}2) = -0.12$   
 $q(\text{C}1) = -0.19$   
 $q(\text{O}) = -0.44$   
 $\rho(\text{Ph}) = 0.13$   
 $\rho(\text{C}2) = 0.33$   
 $\rho(\text{C}1) = -0.06$   
 $\rho(\text{O}) = 0.73$

**TS1<sup>q</sup>**  
(conformer 2)  
 $\Delta G^\ddagger = 12.2$  ( $\Delta E^\ddagger = 10.3$ )  
 $|\angle \text{Fe-O-C}1\text{-C}2| = 178.8^\circ$

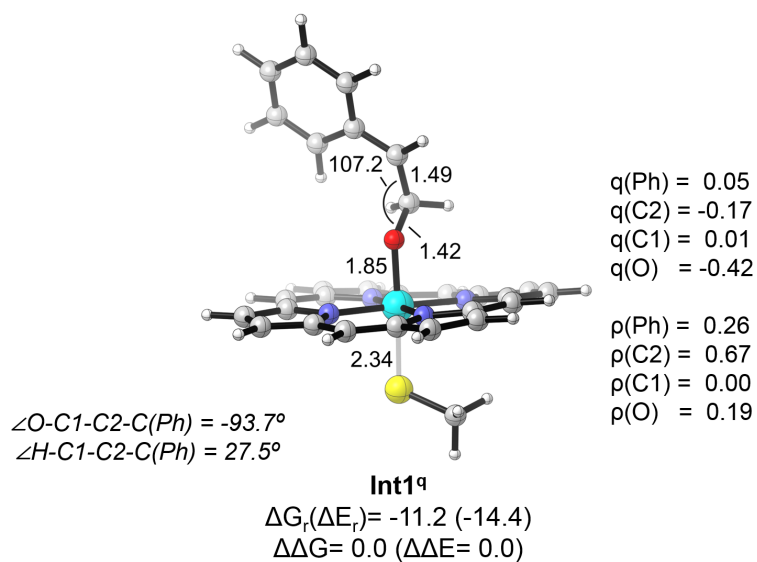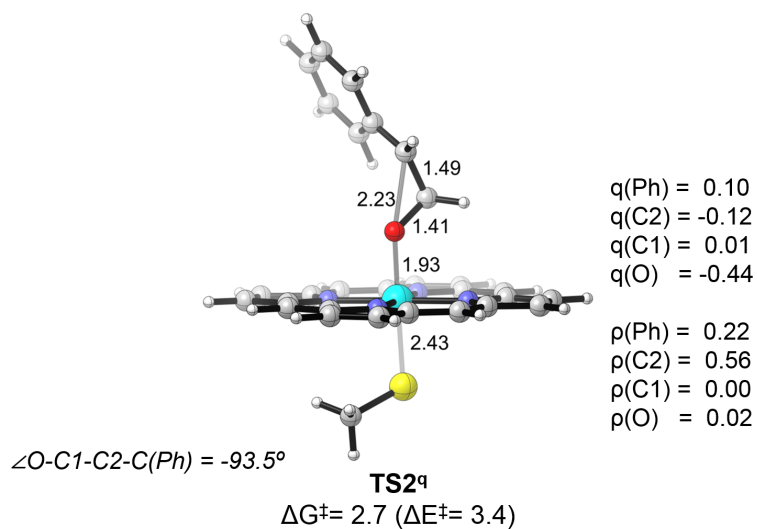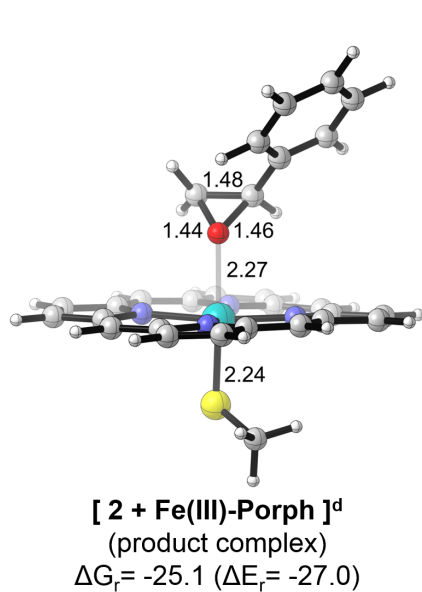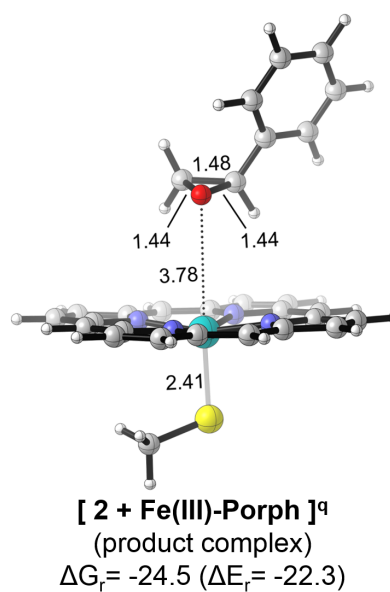

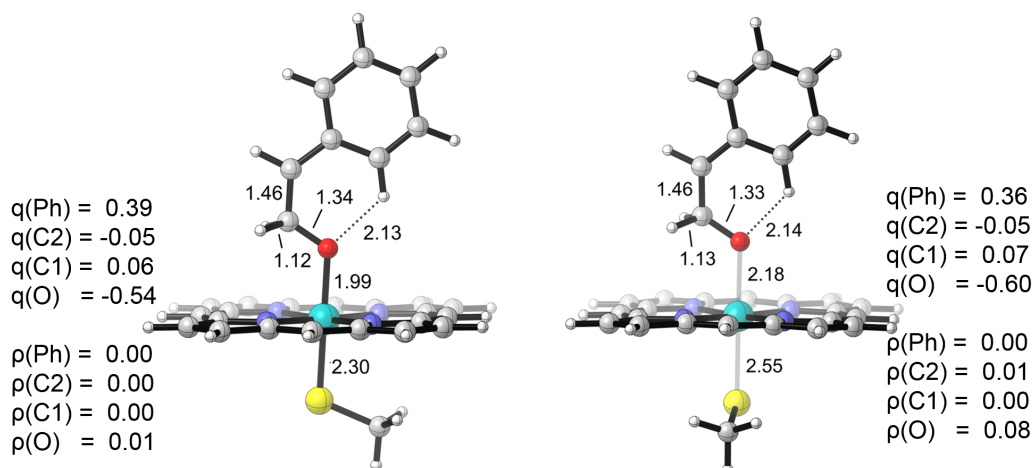

**Int2<sup>d</sup>**  
 $\Delta\Delta G = -3.8$  ( $\Delta\Delta E = -4.2$ )  
 $\angle\text{O-C}1\text{-C}2\text{-C}(\text{Ph}) = 0.8^\circ$   
 $\angle\text{H-C}1\text{-C}2\text{-C}(\text{Ph}) = 130.0^\circ$

**Int2<sup>q</sup>**  
 $\Delta\Delta G = 0.8$  ( $\Delta\Delta E = 3.7$ )  
 $\angle\text{O-C}1\text{-C}2\text{-C}(\text{Ph}) = -2.9^\circ$   
 $\angle\text{H-C}1\text{-C}2\text{-C}(\text{Ph}) = 124.1^\circ$

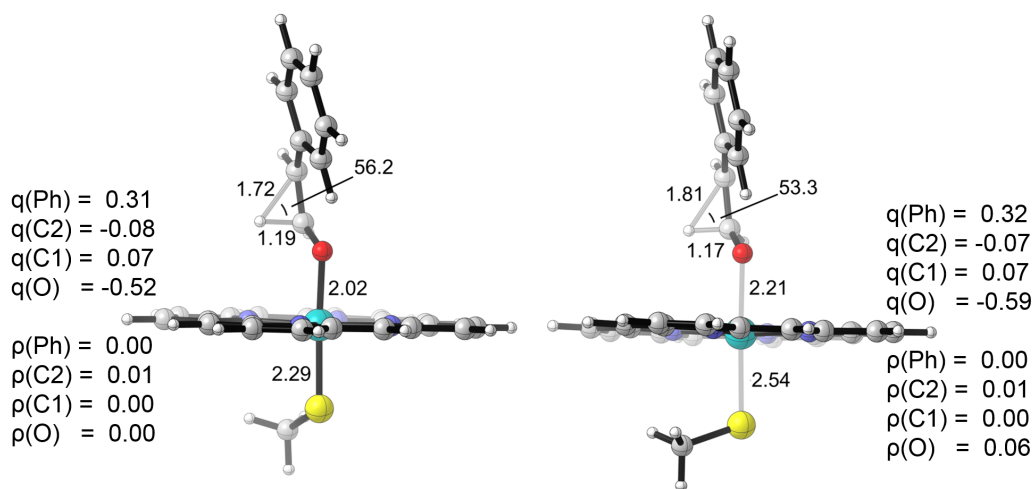

**TS3<sup>d</sup>**  
 $\Delta G^\ddagger = 0.0$  ( $\Delta E^\ddagger = 0.8$ )  
 $\angle\text{H-C}1\text{-C}2\text{-C}(\text{Ph}) = 101.2^\circ$

**TS3<sup>q</sup>**  
 $\Delta G^\ddagger = -0.4$  ( $\Delta E^\ddagger = -0.1$ )  
 $\angle\text{H-C}1\text{-C}2\text{-C}(\text{Ph}) = 106.7^\circ$

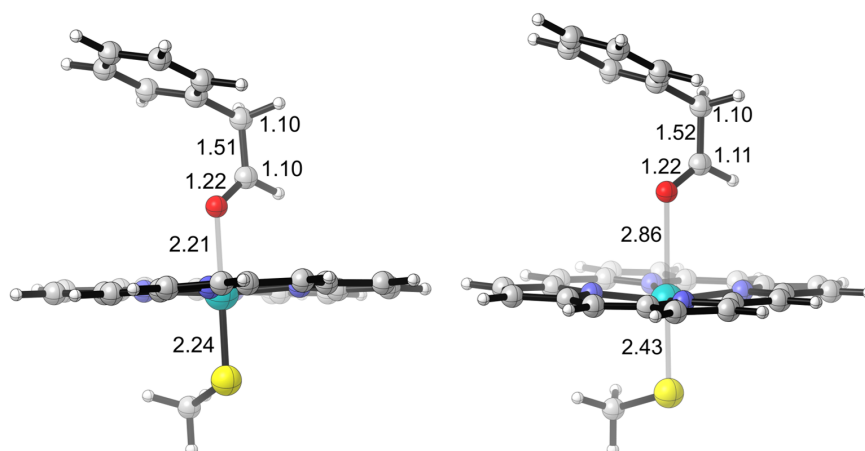

**[ 3 + Fe(III)-Porph ]<sup>d</sup>**  
 (product complex)  
 $\Delta G_r = -43.1$  ( $\Delta E_r = -43.5$ )

**[ 3 + Fe(III)-Porph ]<sup>q</sup>**  
 (product complex)  
 $\Delta G_r = -49.5$  ( $\Delta E_r = -49.2$ )

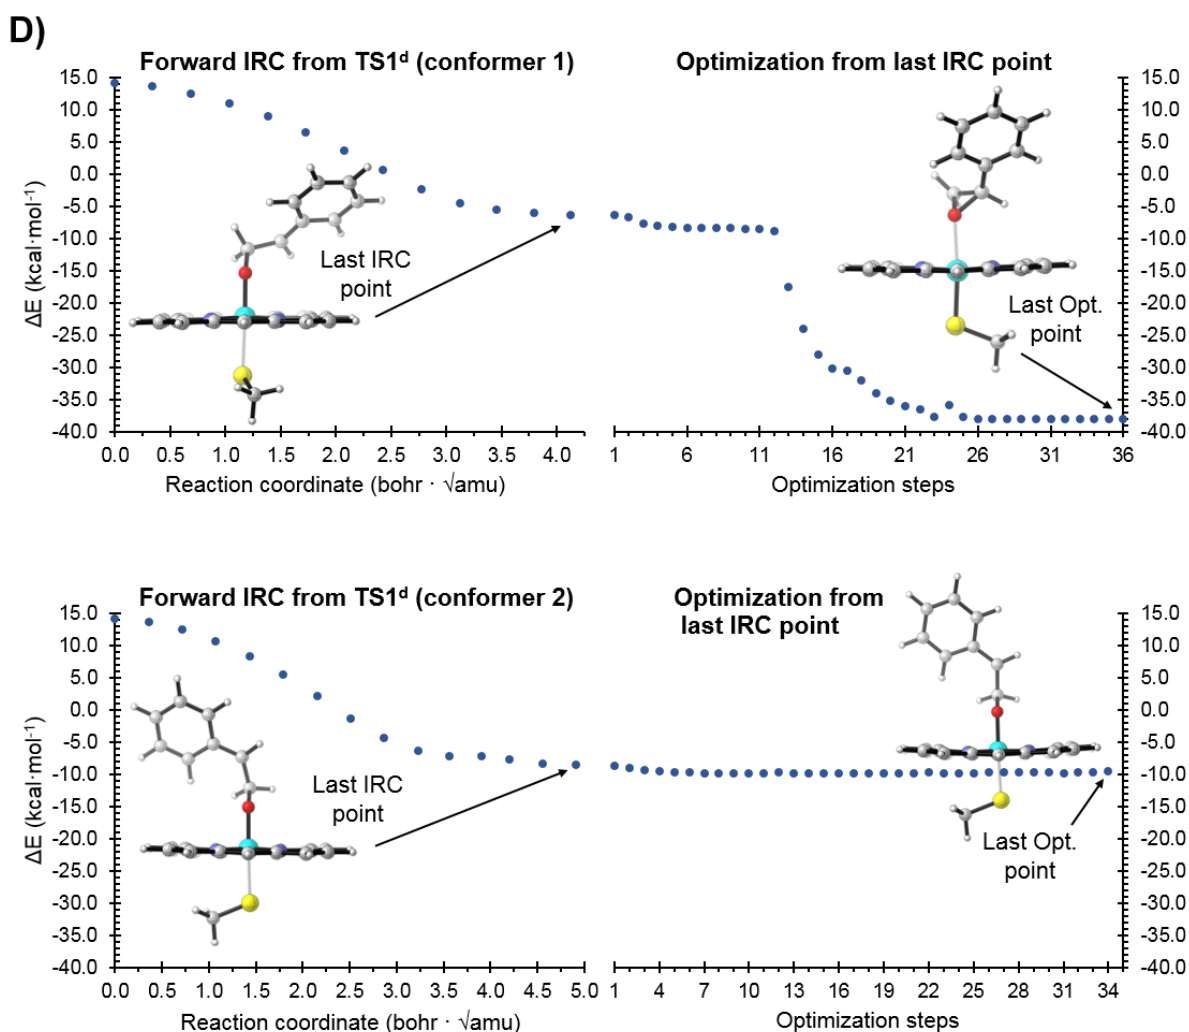

The two lowest in energy conformers optimized for **TS1** are found with a low energy difference (ca. 0.4 kcal·mol<sup>-1</sup>) between them. The major geometric difference between these two lowest in energy conformers is the relative orientation of the styrene with respect to the iron-oxo species, defined by the  $\angle(\text{Fe-O-C1-C2})$  dihedral angle. This geometric parameter describes the major remarkable structural difference between the two conformers, being  $\angle(\text{Fe-O-C1-C2}) = 85.0^\circ$  for conformer 1 and  $\angle(\text{Fe-O-C1-C2}) = 160.0^\circ$  for conformer 2.

IRC calculations carried out for **TS1** in the doublet electronic state, reported in **Figure S1-D** describe the potential formation of a radical intermediates. Subsequent full optimizations starting form the last IRC converged structure lead to the direct formation of styrene oxide product (**2**), from **TS1** - conformer 1, or do not reach convergency after 35 cycles of optimization, **TS1** - conformer 2. Consequently, a radical intermediate in the doublet state could not be optimized as a stationary point and minimum on the potential energy surface (PES). However, these IRC calculations are strongly suggesting that this corresponds to a flat region on the doublet PES, and that small perturbations (interactions with surrounding active site residues, for instance) would stabilize the formation of a radical intermediate in the doublet electronic state (as discovered after in our modelling of the enzymatic reaction).

**Table S1:** DFT computed relative energies for all the stationary points described in **Figure S1** in doublet (d) and quartet (q) electronic states in terms of electronic energy ( $\Delta E$ ), enthalpy ( $\Delta H$ ), and quasi-harmonic corrected Gibbs energy ( $\Delta G$ ). Energy values were obtained at the (U)B3LYP/Def2TZVP/PCM(dichloromethane)//(U)B3LYP/6-31G(d)+SDD(Fe)/PCM(dichloromethane) level. Energies are referred considering the lowest in energy quartet **1<sup>q</sup>** (reactant complex) in the quartet electronic state as zero. All energies are given in kcal·mol<sup>-1</sup>.

| Structure                                         | Electronic State | $\Delta E$ | $\Delta H$ | $\Delta G$ |
|---------------------------------------------------|------------------|------------|------------|------------|
| [ <b>1 + Cpd I</b> ]<br>(reactant complex)        | doublet (d)      | -0.2       | -0.2       | 0.1        |
|                                                   | quartet (q)      | 0.0        | 0.0        | 0.0        |
| <b>TS1</b><br>(conformer 1)                       | doublet (d)      | 9.3        | 8.2        | 11.0       |
|                                                   | quartet (q)      | 8.5        | 7.5        | 10.9       |
| <b>TS1</b><br>(conformer 2)                       | doublet (d)      | 10.1       | 9.0        | 11.3       |
|                                                   | quartet (q)      | 10.3       | 9.3        | 12.2       |
| <b>Int1</b>                                       | quartet (q)      | -14.4      | -14.2      | -11.2      |
|                                                   | quartet (q)      | -11.0      | -11.5      | -8.5       |
| [ <b>2 + Fe(III)-Porph</b> ]<br>(product complex) | doublet (d)      | -41.4      | -39.9      | -36.3      |
|                                                   | quartet (q)      | -36.7      | -35.4      | -35.7      |
| <b>Int2</b>                                       | doublet (d)      | -18.6      | -18.9      | -15.0      |
|                                                   | quartet (q)      | -10.7      | -11.6      | -10.4      |
| <b>TS3</b>                                        | doublet (d)      | -17.8      | -19.2      | -14.9      |
|                                                   | quartet (q)      | -10.9      | -12.7      | -10.8      |
| [ <b>3 + Fe(III)-Porph</b> ]<br>(product complex) | doublet (d)      | -62.0      | -60.9      | -58.0      |
|                                                   | quartet (q)      | -59.9      | -59.1      | -59.9      |

**Figure S2:** DFT calculations on the truncated model were carried out to study the rotation of the C1–C2 bond in the covalent radical intermediate in the quartet electronic state (**Int1<sup>q</sup>**, **Figure S1**), which enables the formation of the covalent carbocation intermediate (**Int2<sup>q</sup>**, **Figure S1**).

**A)** Two independent relaxed scan calculations were carried out along the rotation of the  $\angle(\text{O}-\text{C1}-\text{C2}-\text{C}(\text{Ph}))$  dihedral angle starting from each optimized intermediate species (**Int1<sup>q</sup>** and **Int2<sup>q</sup>**). Results for the radical intermediate (**Int1<sup>q</sup>**, structure on the right) and the carbocation intermediate (**Int2<sup>q</sup>**, structure on the left) are shown with black markers and blue markers, respectively. Results for the calculations starting from the carbocation intermediate are also highlighted in an inset graph. Electronic energies were obtained at the (U)B3LYP/6-31G(d)+SDD(Fe)/PCM (dichloro-methane) level.

**B)** DFT optimized rotation transition state (**TS-rotation<sup>q</sup>**). It was optimized starting from the highest in energy point on the relaxed scan coordinate. Mulliken charges ( $q$ ) and spin densities ( $\rho$ ) for the phenyl group (sum of all C and H atoms), C2 benzylic position, C1 and O are given in a.u. This transition state resembles the geometry of **Int2<sup>q</sup>**, but possessing a radical character at the benzylic position. The **TS-rotation<sup>q</sup>** connects two equivalent enantiomeric **Int1<sup>q</sup>** structures.

**C)** DFT computed relative energies for all relevant stationary points in doublet (d) and quartet (q) electronic states in terms of electronic energy ( $\Delta E$ ), enthalpy ( $\Delta H$ ), and quasi-harmonic corrected Gibbs energy ( $\Delta G$ ). Energy values were obtained at the (U)B3LYP/Def2TZVP/PCM(dichloro-methane)//(U)B3LYP/6-31G(d)+SDD(Fe)/PCM (dichloromethane) level.

Energies are referred considering the optimized **Int1<sup>q</sup>** as zero. Energies and dihedrals are given in kcal·mol<sup>-1</sup> and degrees (°), respectively.

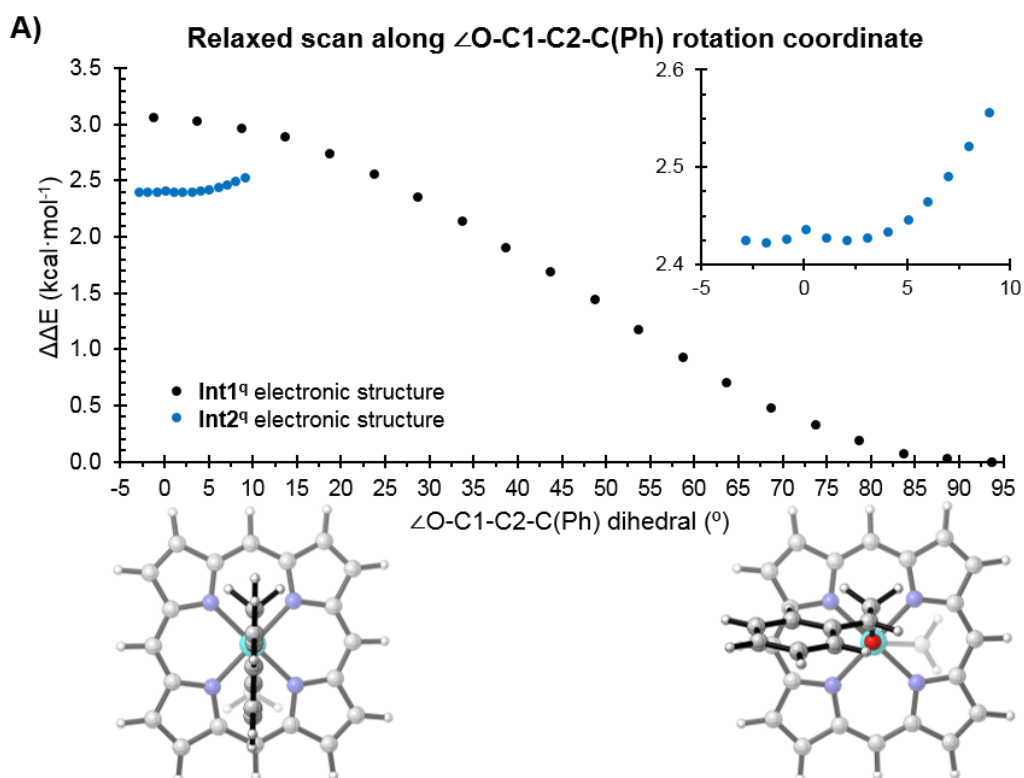

B)

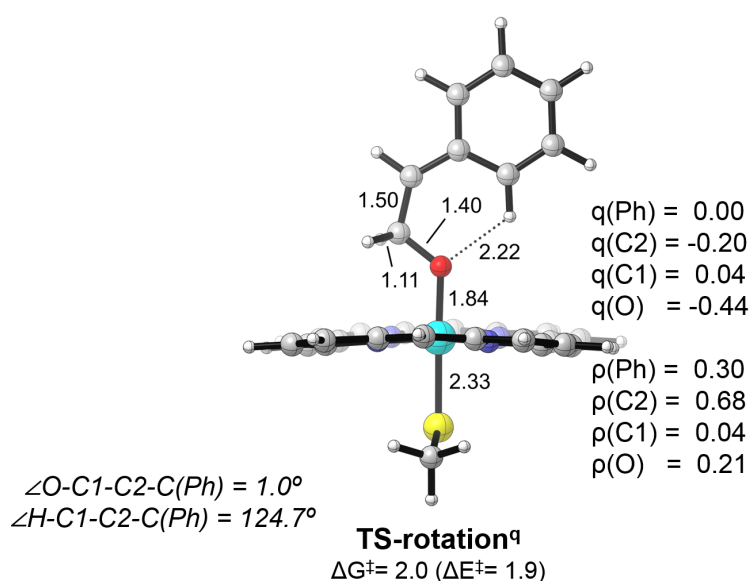

C)

| Structure                | Electronic State | $\Delta\text{E}$ | $\Delta\text{H}$ | $\Delta\text{G}$ |
|--------------------------|------------------|------------------|------------------|------------------|
| <b>Int1</b> <sup>a</sup> | quartet (q)      | 0.0              | 0.0              | 0.0              |
| <b>TS2</b> <sup>a</sup>  | quartet (q)      | 3.4              | 2.7              | 2.7              |
| <b>TS-rotation</b>       | quartet (q)      | 1.9              | 0.9              | 2.0              |
| <b>Int2</b> <sup>a</sup> | doublet (d)      | -4.2             | -4.7             | -3.8             |
|                          | quartet (q)      | 3.7              | 2.6              | 0.8              |

<sup>a</sup> From Figure S1

Relaxed scan calculation starting from the optimized radical **Int1**<sup>q</sup> geometry (black dots) showed that rotation along C1-C2 bond is energetically feasible and that it can bend to reach carbocation-like geometries (with  $\angle(\text{O-C1-C2-C(Ph)})$  ca.  $0^\circ$ ) with low energy requirements ( $3.1 \text{ kcal}\cdot\text{mol}^{-1}$ ). This conformation corresponds to a transition state (**TS-rotation**<sup>q</sup>) for the phenyl rotation in the radical electronic structure, with  $\Delta\text{G}^\ddagger = 2.0 \text{ kcal}\cdot\text{mol}^{-1}$ . This optimized **TS-rotation**<sup>q</sup> is ca.  $0.7 \text{ kcal}\cdot\text{mol}^{-1}$  lower in energy than the optimized **TS2**<sup>q</sup>, and ca.  $1.2 \text{ kcal}\cdot\text{mol}^{-1}$  higher in energy than the carbocation intermediate in the quartet electronic state (**Int2**<sup>q</sup>). Geometrically, both **TS-rotation** and **Int2**<sup>q</sup> exhibit a similar orientation of the aromatic ring.

The relaxed scan calculations starting from the carbocation intermediate **Int2**<sup>q</sup> showed that distortions of the dihedral angle larger than  $10^\circ$  induce the spontaneous 1,2-hydride migration. This is in line with the high reactivity of **Int2**, and its stabilization due to stereoelectronic effects occurring in the optimal geometry with  $\angle(\text{O-C1-C2-C(Ph)})$  angle near to zero. Additionally, the minimum energy crossing point (MECP) between doublet (d) and quartet (q) carbocation intermediates **Int2** was also studied (see **Figure S4**).



**Figure S3:** A-C) Frontier Molecular Orbitals (FMO) and **D)** spin density ( $\rho$ ) distribution corresponding to the key intermediates **Int1<sup>q</sup>** (quartet), **Int2<sup>d</sup>** (doublet), and **Int2<sup>q</sup>** (quartet) described in **Figure S1**. Molecular orbitals (isovalue = +0.02 and -0.02) and spin density (isovalue = 0.008) were obtained at the (U)B3LYP/Def2TZVP/PCM(dichloromethane)//(U)B3LYP/6-31G(d)+SDD(Fe)/PCM(dichloromethane) level. Molecular Orbital energies are given in eV. Mulliken spin densities ( $\rho$ ) of key atoms and groups (Ph = sum of all atoms on the aromatic ring) are reported in a.u.

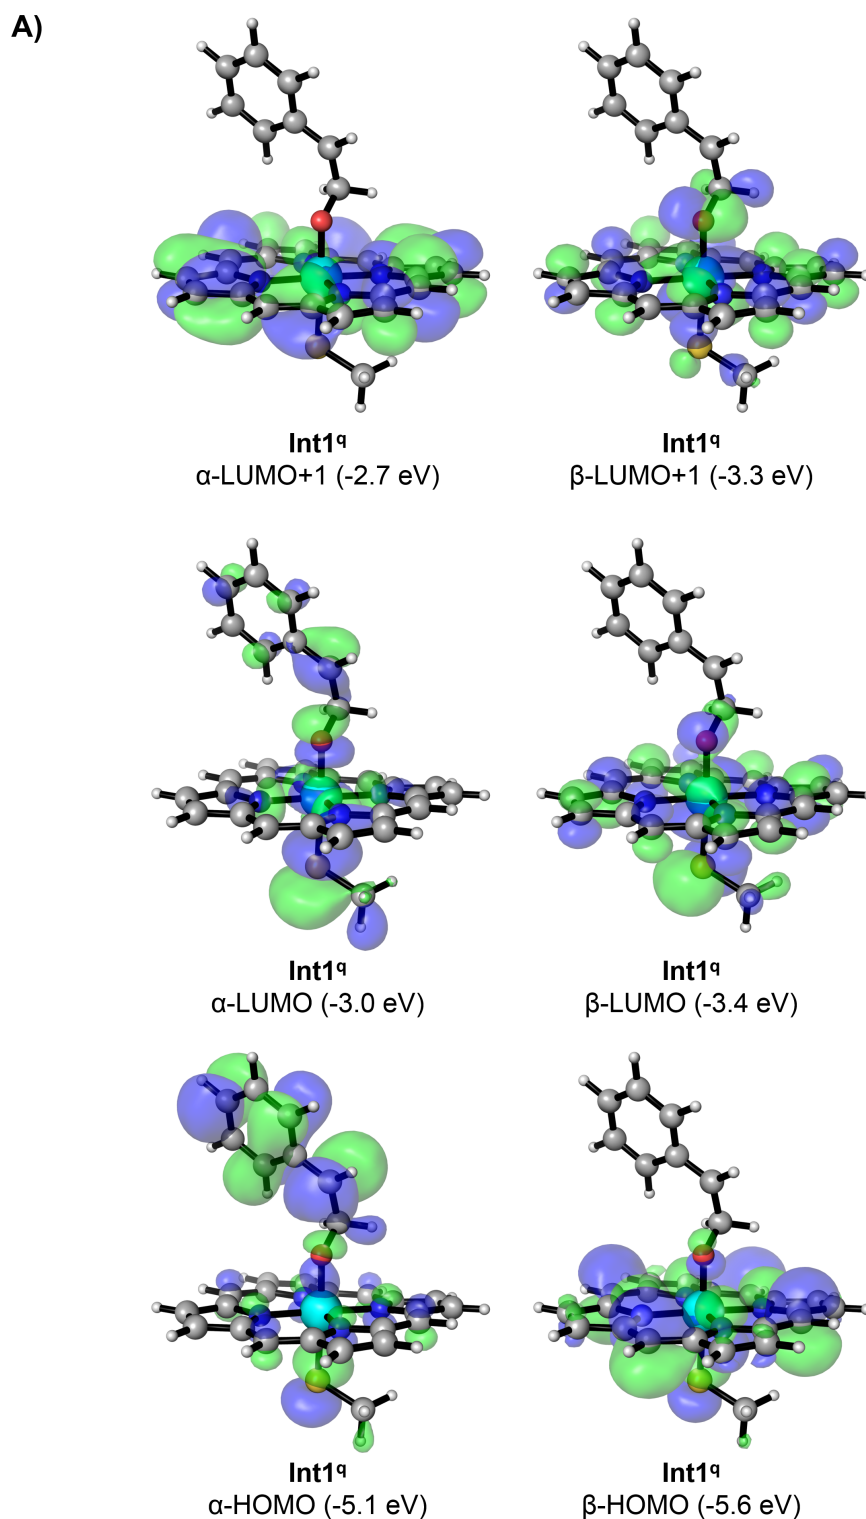

B)

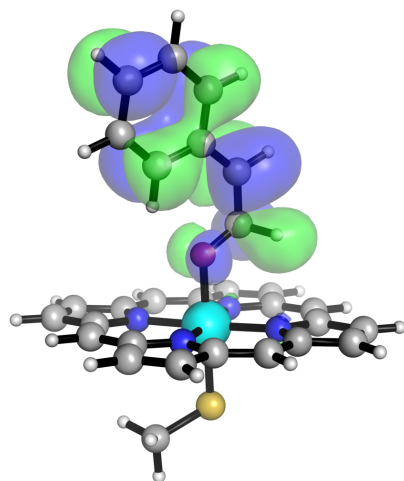

**Int2<sup>d</sup>**  
 $\alpha$ -LUMO (-3.9 eV)

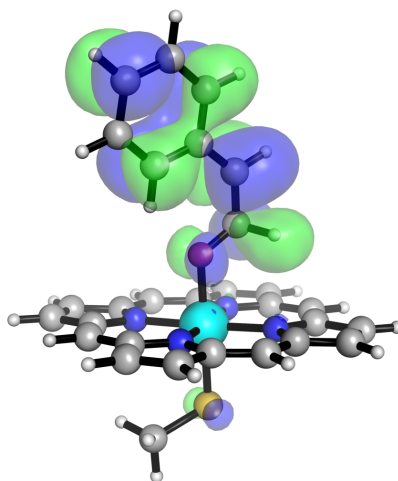

**Int2<sup>d</sup>**  
 $\beta$ -LUMO (-3.9 eV)

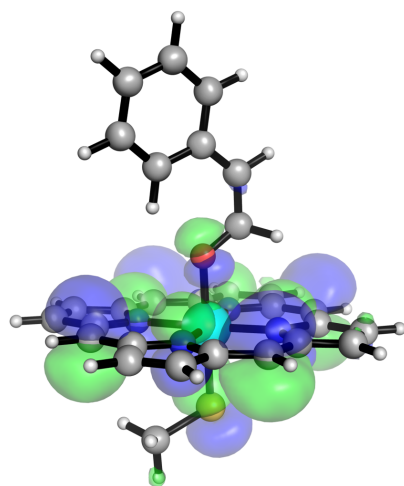

**Int2<sup>d</sup>**  
 $\alpha$ -HOMO (-5.2 eV)

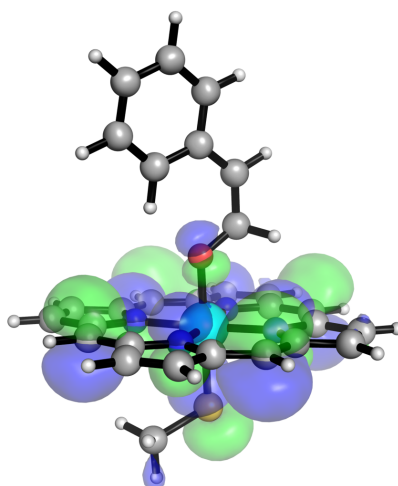

**Int2<sup>d</sup>**  
 $\beta$ -HOMO (-5.2 eV)

c)

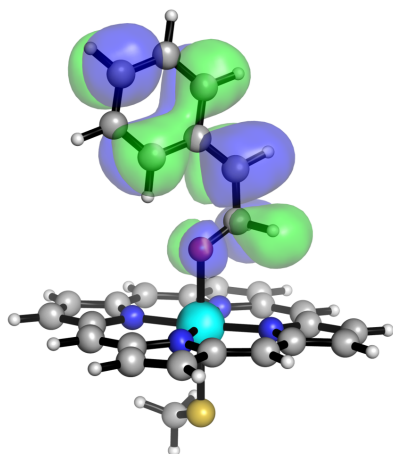

**Int2<sup>a</sup>**  
 $\alpha$ -LUMO (-3.8 eV)

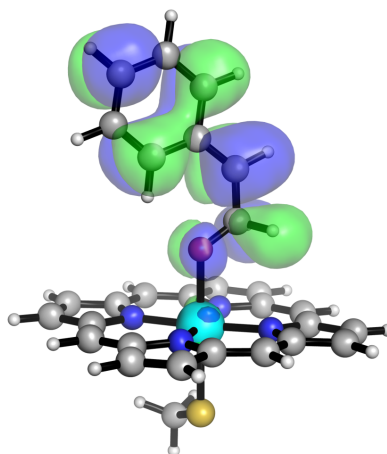

**Int2<sup>a</sup>**  
 $\beta$ -LUMO (-3.8 eV)

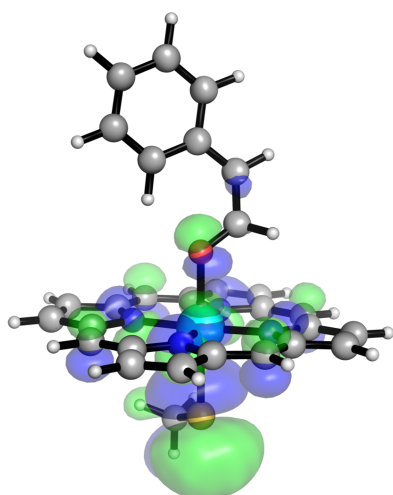

**Int2<sup>a</sup>**  
 $\alpha$ -HOMO (-4.8 eV)

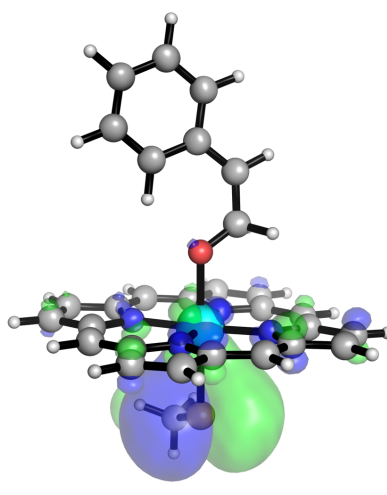

**Int2<sup>a</sup>**  
 $\beta$ -HOMO (-4.9 eV)

D)

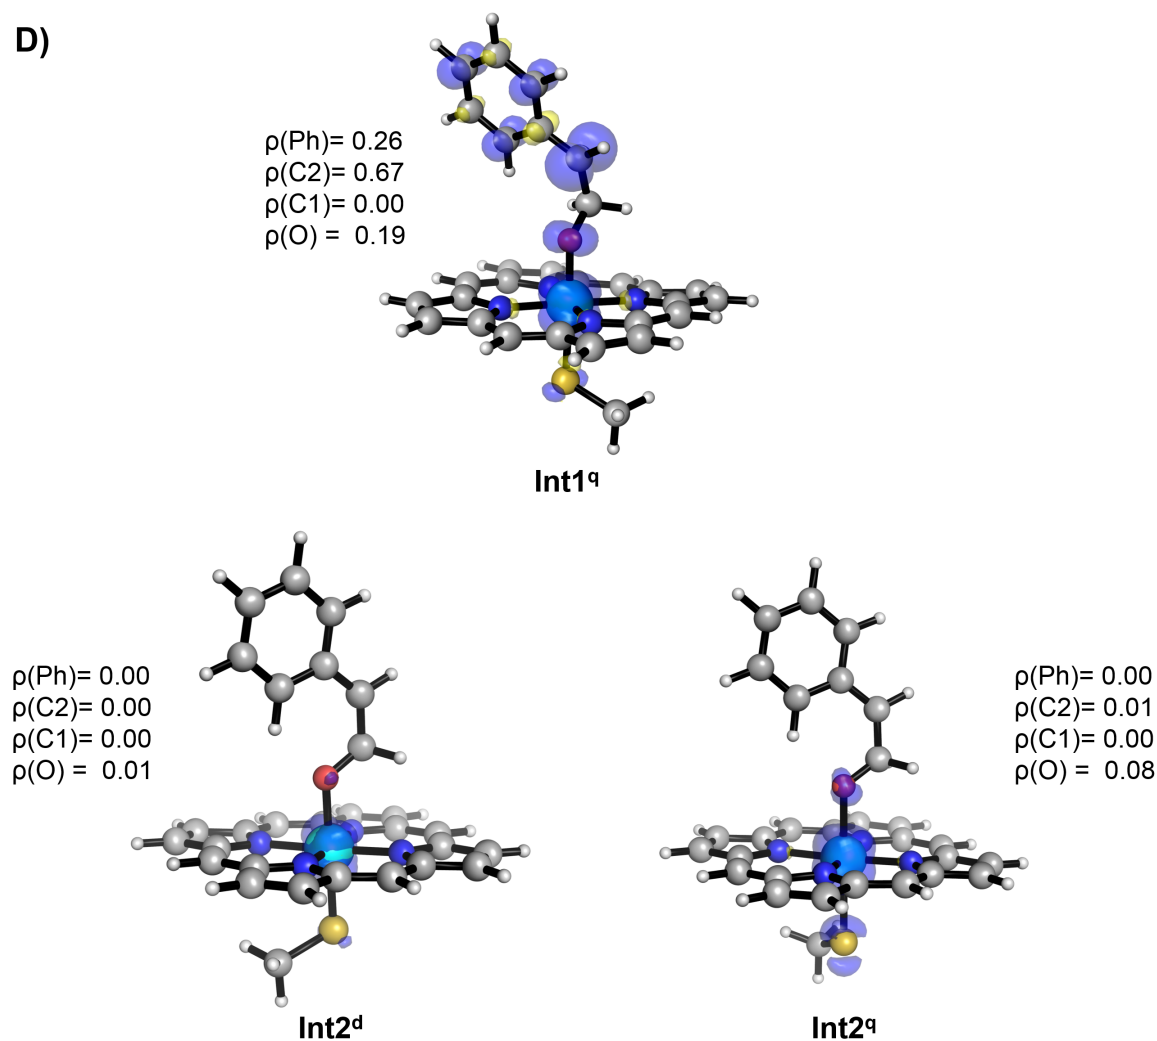

Analysis of the Frontier Molecular Orbitals of optimized radical intermediate **Int1<sup>q</sup>** (A) describe that the highest in energy occupied orbital,  $\alpha$ -HOMO, is mainly localized on the former substrate moiety, while the  $\alpha$ -LUMO and  $\alpha$ -LUMO+1, and  $\beta$ -LUMO and  $\beta$ -LUMO+1, are mainly localized on the iron-oxygen, porphyrin and axial methanethiolate ligands.

On the other hand, covalent carbocation intermediate (**Int2**) in doublet (d) and quartet (q) electronic states (**B** and **C**, respectively) have both the  $\alpha$ - and  $\beta$ -HOMO orbitals mainly localized on the iron-oxygen, porphyrin and axial methanethiolate ligands. In contrast, both the  $\alpha$  and  $\beta$ -LUMO orbitals localized on the former substrate moiety.

The inverted occupancy of the FMOs in the radical and carbocation intermediates is describing an intramolecular electronic rearrangement that involves an electron transfer from the substrate moiety to the iron-heme. This is also reflected by the changes observed on the spin density distribution (**D**).

**Figure S4:** Minimum energy crossing point (MECP) between doublet and quartet potential energy surfaces (PES) for carbocation intermediate (**Int2**). **A)** Relative energies (E, electronic energy; H enthalpy; G, Gibbs free energy) for the carbocation intermediate (**Int2**) in the doublet and quartet electronic states, and the optimized MECP at the (U)B3LYP/6-31G(d)+SDD(Fe)/PCM(dichloromethane) level of theory. Single point (SP) energies at the (U)B3LYP/Def2TZVP/PCM(dichloromethane) level are also reported. **B)** Optimized structures for the studied species. Relative energies are referred considering the lowest in energy **Int2<sup>d</sup>** as zero. Energies and distances are given in kcal·mol<sup>-1</sup> and Angstroms (Å), respectively.

**A)**

| Structure                     | Electronic State         | $\Delta\Delta E$ | $\Delta\Delta H$ | $\Delta\Delta G$ |
|-------------------------------|--------------------------|------------------|------------------|------------------|
| <b>Int2</b><br>(optimization) | doublet (d)              | 0.0              | 0.0              | 0.0              |
|                               | MECP                     | 8.1              | 5.5              | 4.9              |
|                               | quartet (q)              | 8.1              | 7.5              | 4.8              |
| <b>Int2</b><br>(SP)           | doublet (d) <sup>a</sup> | 0.0              | 0.0              | 0.0              |
|                               | MECP <sup>b</sup>        | 6.8              | 4.6              | 5.6              |
|                               | quartet (q) <sup>a</sup> | 7.8              | 7.3              | 4.6              |

<sup>a</sup> From **Figure S1**.

<sup>b</sup> Energy values obtained considering the quartet electronic state of the optimized MECP geometry.

**B)**

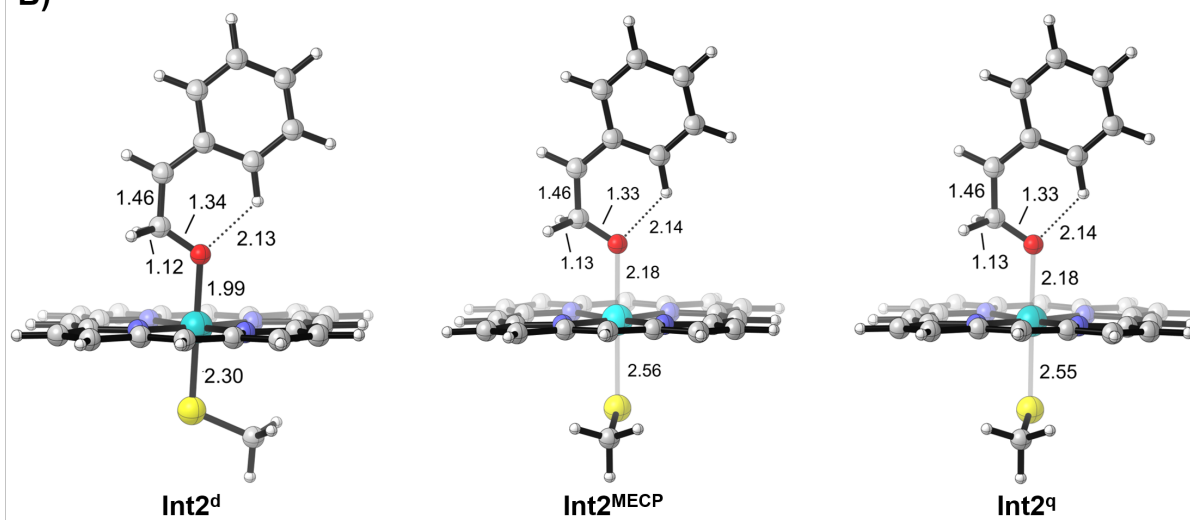

MECP between doublet and quartet potential energy surfaces (PES) for carbocation intermediate (**Int2**) is very close in energy to the quartet **Int2<sup>q</sup>**. This is indicating that the energetic cost of crossing from the higher in energy quartet state **Int2<sup>q</sup>** to the most stable doublet state **Int2<sup>d</sup>** can compete with the 1,2-hydride migration transition state (**TS3<sup>q</sup>**, see **Figure S1**).

### III. Quasiclassical direct dynamics trajectory simulations

**Figure S5:** Displacement vectors (represented as yellow arrows) associated to the imaginary frequency of optimized **TS1**. The two relevant optimized conformers for **TS1** in the doublet (d) and quartet (q) electronic states are shown (see **Figure S1**). Energy values were obtained at the (U)B3LYP/Def2TZVP/PCM(dichloromethane)//(U)B3LYP/6-31G(d)+SDD(Fe)/PCM(dichloromethane) level. All energies are referred considering the reactant complex (**1<sup>q</sup>**) as zero (see **Table S1**). Energy values are given in kcal·mol<sup>-1</sup>.

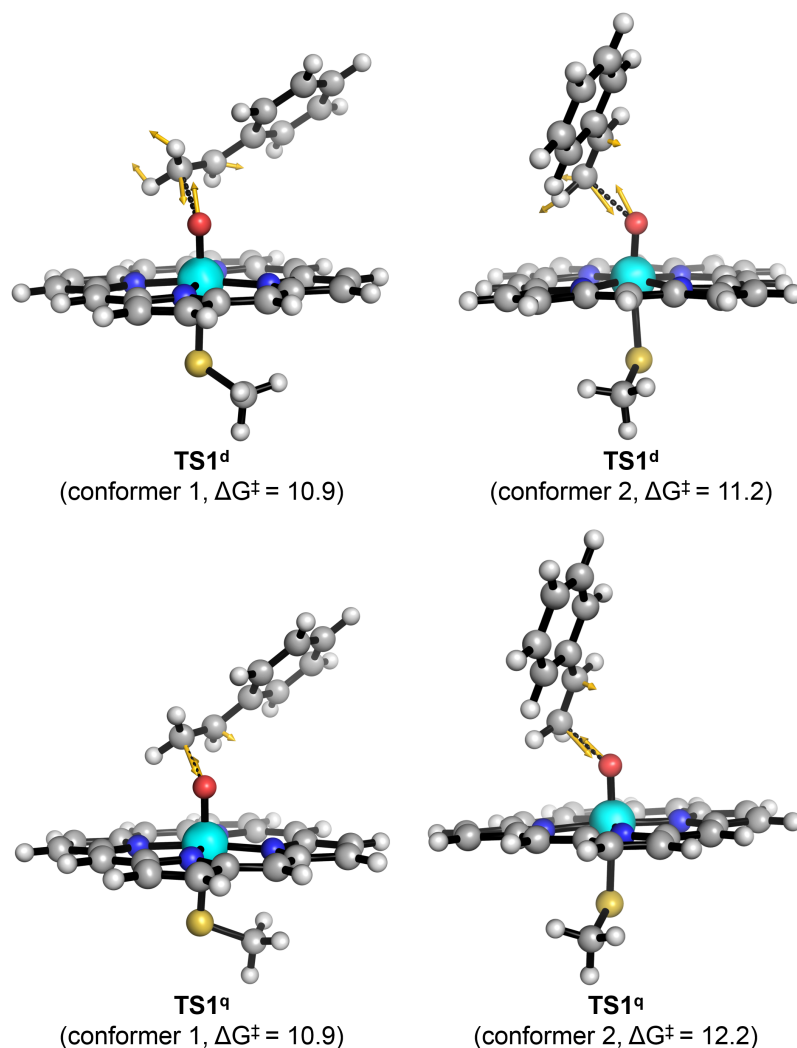

The displacement vectors associated to the imaginary frequencies of optimized **TS1** are very similar for both spin states (doublet and quartet) and relevant conformers. In all cases, the imaginary frequency involves also the motion of C2.

**Figure S6:** Direct quasiclassical dynamics trajectories (QCT) were carried out at the (U)B3LYP/6-31G(d)+ SDD(Fe) level. **A)** Summary of the trajectories carried out at the doublet (total of 20 trajectories) and quartet (total of 20 trajectories) electronic states trajectories that lead to epoxide formation, aldehyde formation, recrossing or radical intermediate that remained unreacted after reaching the trajectory time limit of 600 fs. Average time gap between C1–O and C2–O bond formation for epoxidations observed from direct QCT are reported. Distance vs time analysis for representative trajectories are reported for each electronic state: **B)** doublet, and **C)** quartet.

**A)**

| Electronic State | Observed event                 | Number of trajectories                |
|------------------|--------------------------------|---------------------------------------|
| doublet (d)      | Epoxide formation              | 15 ( <i>average time gap: 92 fs</i> ) |
|                  | Aldehyde formation             | 0                                     |
|                  | Recrossing                     | 5                                     |
|                  | Unreacted radical intermediate | 0                                     |
| quartet (q)      | Epoxide formation              | 11 ( <i>average timegap: 265 fs</i> ) |
|                  | Aldehyde formation             | 0                                     |
|                  | Recrossing                     | 2                                     |
|                  | Unreacted radical intermediate | 7                                     |

**B)**

*Epoxide formation (d):*

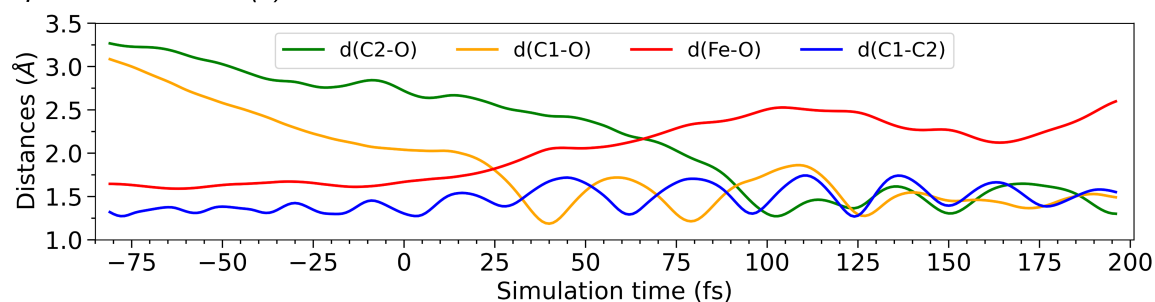

*Recrossing (d):*

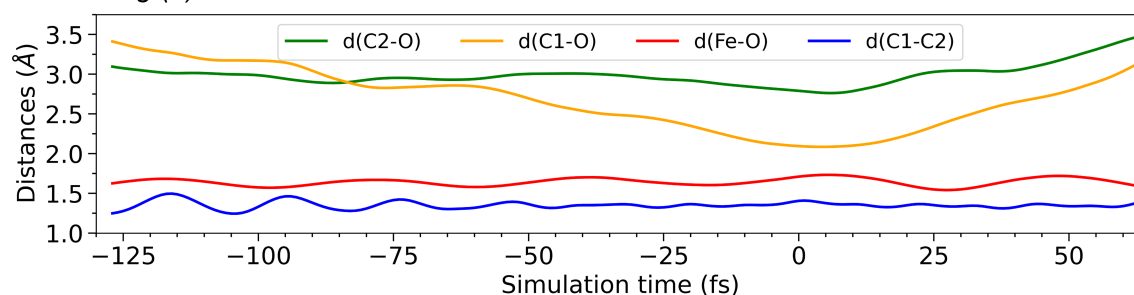

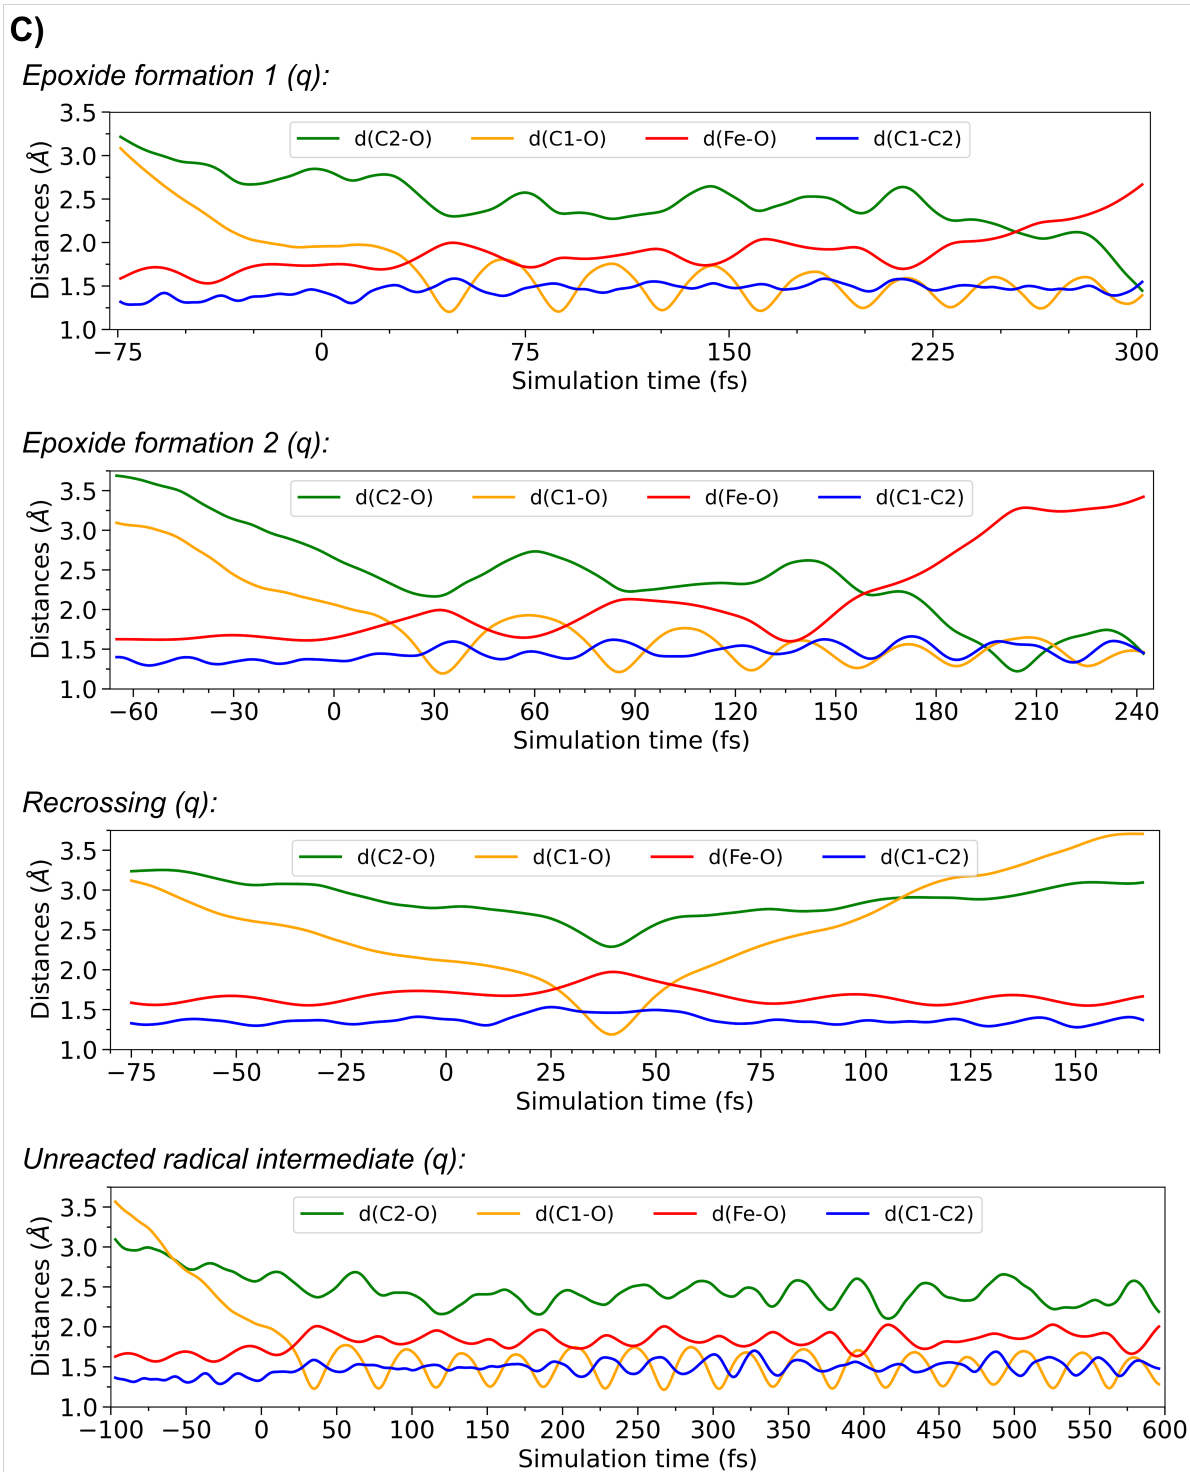

None of the 40 trajectories lead to the direct formation of the aldehyde product. Instead, 65% of these trajectories (15 doublet + 11 quartet) directly generate styrene oxide (**2**) and the 17.5% (5 doublet + 2 quartet) exhibited non-reactive recrossing events. In the quartet electronic state 35% of the trajectories (7 of 20) formed the covalent radical intermediate that remained unreacted after reaching the trajectory time limit of 600 fs. This is not observed in the doublet electronic state.

For reactive trajectories leading to the epoxide product (styrene oxide), an average time gap between the formation of C1–O and C2–O is estimated to be ca. 265 fs for the quartet electronic state and ca. 92 fs for the doublet (see also representative distance vs. time plots in **B** and **C**).



From these time gap values, the epoxidation pathway can be classified as dynamically concerted in both electronic states according to Houk and co-workers time gap criterion (see discussion in the main text).

The lifetime estimated for the quartet radical intermediate from epoxide reactive direct QCT is significantly lower than the one predicted from transition state theory (see main text for discussion), demonstrating the existence of a strong “*dynamic match*” coupling between the coordinates for C1–O and C2–O bond formation. On the other hand, for the doublet electronic state, the existence of a time gap > 60 fs, indicates the potential formation of an entropic intermediate prior epoxide formation. The formation of such entropic intermediate suggests that proper stabilization via conformational restraints or non-covalent interactions in an enzyme active site, for example, could lead to the formation of a covalent intermediate as a minimum on the doublet potential energy surface. This is indeed in line with the QM/MM modelling carried out in this study (see results in the main text), which allow the access to the carbonyl pathway also from the doublet electronic state.

#### IV. Computational modelling of the enzyme-substrate bound complexes

**Figure S7:** Representative structures of the most populated conformational state characterized from MD simulations (5 replicas of 1,000 ns each, accumulation a total of 5,000 ns) for P450<sub>LA1</sub> WT (structure in gray) and the laboratory evolved aMOx variant (structure in blue) in their *holo* states. The most populated conformational states were characterized by clusterization of the accumulated simulation time, based on the protein backbone RMSD. **A)** P450<sub>LA1</sub> and **B)** aMOx representative structures. **C)** Active sites of P450<sub>LA1</sub> and aMOx. Yellow surfaces describe the accessible active site volume estimated from volume calculations using POVME3.0 software. Relevant active site residues are shown as sticks and mutated positions are highlighted in orange.

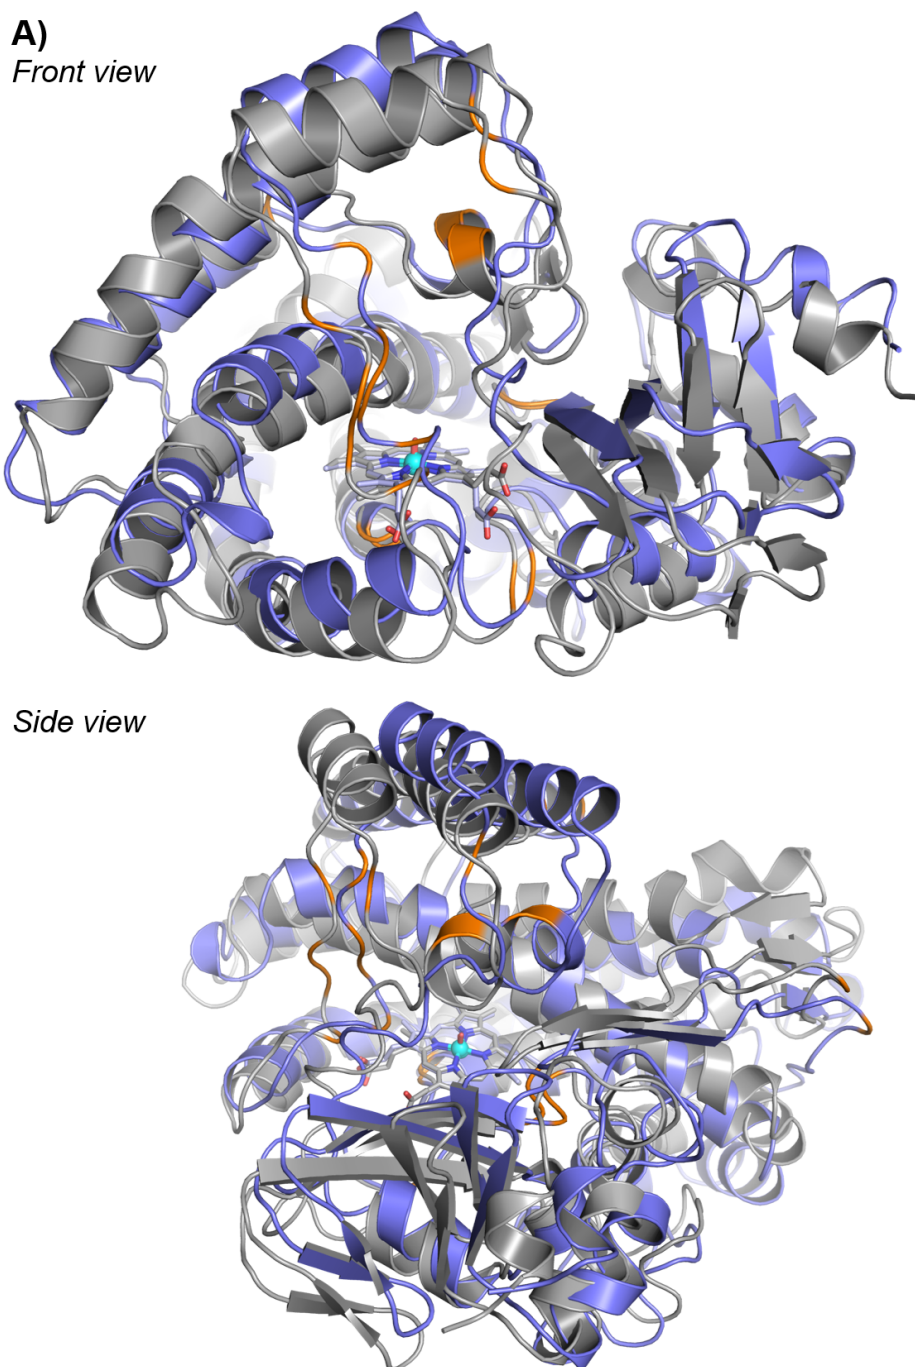

**B)**  
**P450<sub>LA1</sub>**

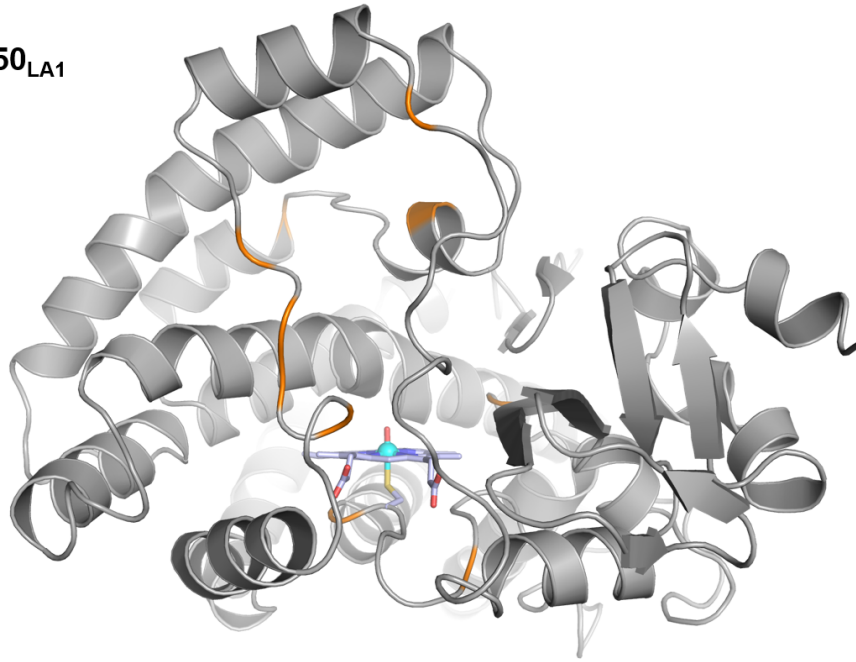

**aMOx**

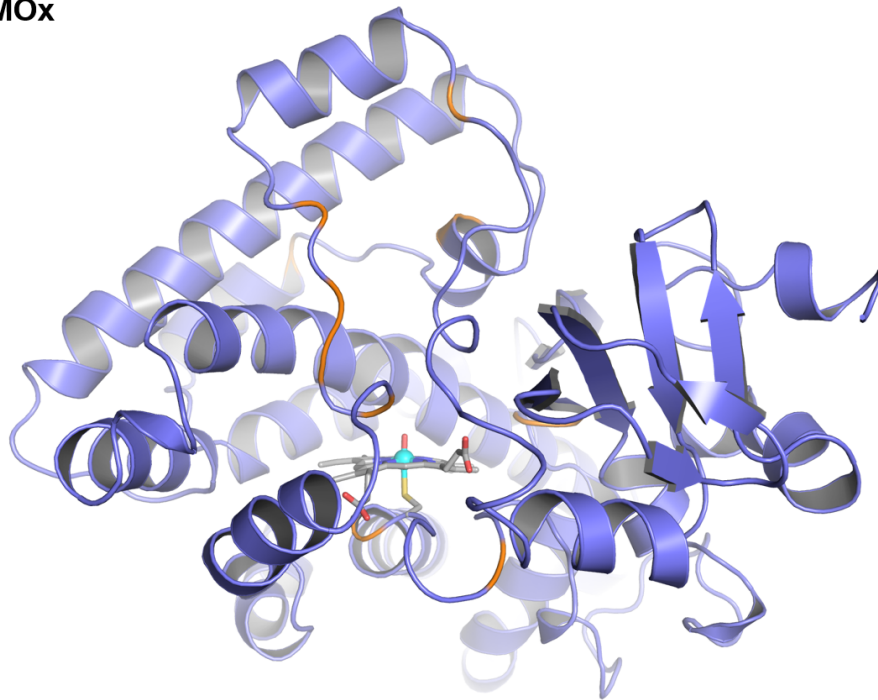

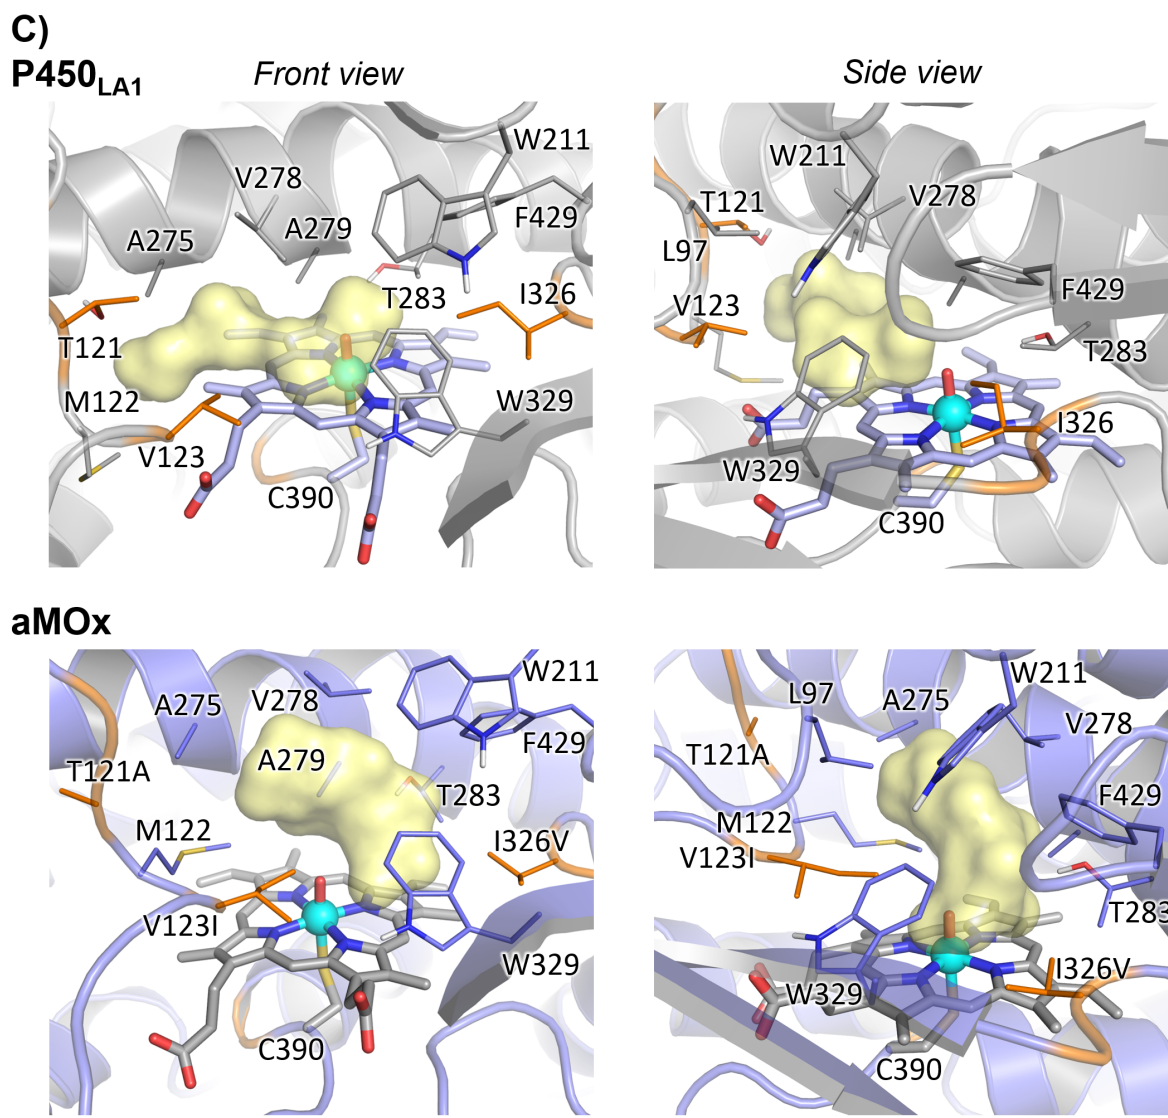

The active site reshaping observed in the laboratory evolved aMOx variant compared to the parent WT P450<sub>LA1</sub> is mainly caused by two major factors. First, I326V and V123I active site mutations directly modify the shape of the active site by displacing the accessible volume towards the right side (from the front view perspective). Second, the global impact of the mutations introduced by directed evolution at more distal positions from the active site (see **Figure 4A** in the main text), which modify the position of the two vertical loops (loops containing V123I and L97, respectively) in the substrate entrance channel. These conformational changes also reorient M122 sidechain inwards to the aMOx variant active site, contributing to the active site reshaping. The loop containing L97 is displaced closer to the heme cofactor as compared to the WT enzyme, making the accessible volume in aMOx narrower.

**Figure S8:** Analysis of the presence of ordered water molecules in P450<sub>LA1</sub> and aMOx active sites from styrene (**1**) bound restrained-MD simulations (5 replicas of 500 ns each, accumulating a total of 2,500 ns for each variant). Analysis were performed using *cpptraj* from AmberTools.

**A)** Schematic representation of the different interactions and water molecules analyzed: In blue, bridging water molecules between Thr283 and Fe-oxo (O atom); In green, O-acceptor water molecule interacting with the hydroxyl group of Thr283; In orange, H-donor water molecule hydrogen bonded with Thr283; In red, H-donor water molecule interacting with Fe-oxo (O atom); In black (but also including the previously analyzed water molecules), solvent molecules around 5.0 Å and 3.4 Å of styrene substrate.

**B)** Average statistics for the presence of each specific H-bond interaction as observed from MD simulations. Values bigger than 1.00 indicate that more than one water molecule can be simultaneously found performing that particular interaction.

**A)**

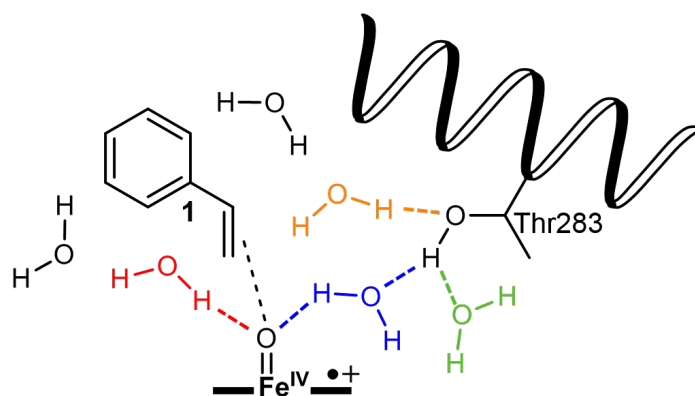

**B)**

| Water analysis in MD simulations                    | LA1  | aMOx |
|-----------------------------------------------------|------|------|
| Bridging H <sub>2</sub> O (Fe=O, HO-Thr283)         | 0.49 | 0.24 |
| H <sub>2</sub> O (HO-Thr283)                        | 0.34 | 0.29 |
| H <sub>2</sub> O (OH-Thr283)                        | 0.04 | 0.09 |
| H <sub>2</sub> O (Fe=O)                             | 0.07 | 0.10 |
| H <sub>2</sub> O at 5.0 Å from styrene ( <b>1</b> ) | 2.22 | 4.26 |
| H <sub>2</sub> O at 3.4 Å from styrene ( <b>1</b> ) | 1.55 | 2.11 |

Simulations describe the significant presence of a bridging water molecule between the activated oxygen in Cpd I and the H-donor atom of Thr283 hydroxyl group. The potential impact of this bridging water molecule is evaluated in **Figure S9**.

**Figure S9:** DFT truncated model calculations to study the impact of a hydrogen bonding water molecule on the relative stability of the radical intermediate (**Int1**) and the carbocation intermediate (**Int2**). Doublet (d) and quartet (q) electronic states are considered. **A)** Relative electronic energy ( $\Delta\Delta E$ ), enthalpy ( $\Delta\Delta H$ ), and quasi-harmonic corrected Gibbs energy ( $\Delta\Delta G$ ) are given for each model system with (**Int1-wat** and **Int2-wat**) or without the water molecule (**Int1** and **Int2**). Energy values were obtained at the (U)B3LYP/DefTZVP/PCM(dichloromethane)//(U)B3LYP/6-11G(d)+SDD(Fe)/PCM(dichloromethane) level. Energies are referred considering quartet radical intermediate (**Int1<sup>q</sup>** or **Int1<sup>q</sup>-wat**) as zero. **B)** Optimized structures for the intermediate models with a hydrogen bonded water molecule (**Int1-wat** and **Int2-wat**). Mulliken charges (q) and spin densities ( $\rho$ ) of key atoms and groups are reported in a.u. Distances and energies are given in Angstroms ( $\text{\AA}$ ) and  $\text{kcal}\cdot\text{mol}^{-1}$ , respectively.

**A)**

| Structure                | Electronic State | $\Delta\Delta E$ | $\Delta\Delta H$ | $\Delta\Delta G$ |
|--------------------------|------------------|------------------|------------------|------------------|
| <b>Int1</b> <sup>a</sup> | quartet (q)      | 0.0              | 0.0              | 0.0              |
| <b>Int2</b> <sup>a</sup> | doublet (d)      | -4.2             | -4.7             | -3.8             |
|                          | quartet (q)      | 3.7              | 2.6              | 0.8              |
| <b>Int1-wat</b>          | quartet (q)      | 0.0              | 0.0              | 0.0              |
| <b>Int2-wat</b>          | doublet (d)      | -4.5             | -4.9             | -3.3             |
|                          | quartet (q)      | -0.4             | -1.2             | -2.4             |

<sup>a</sup> From Figure S1.

**B)**

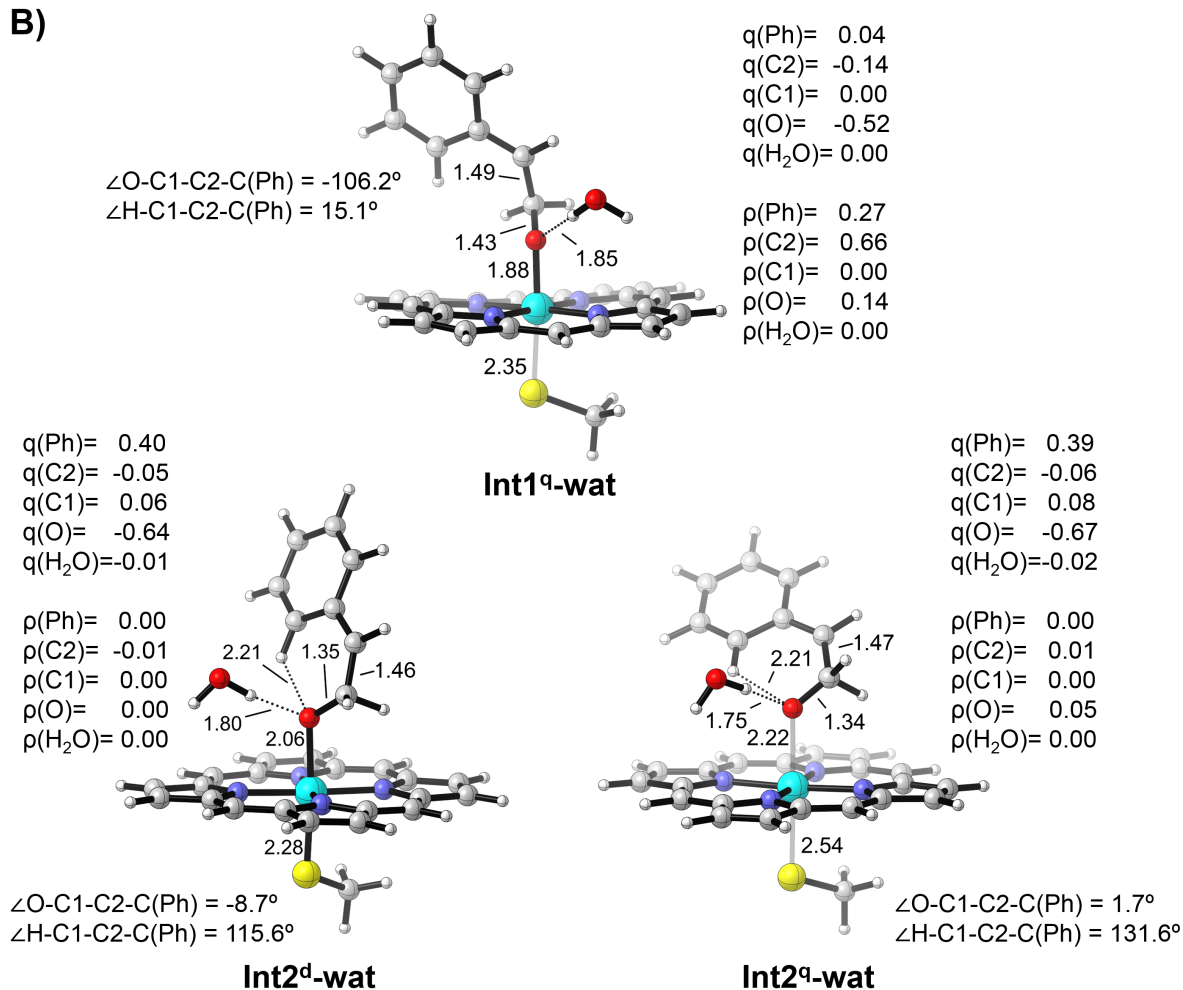

Carbocation intermediate in the quartet electronic state (**Int2<sup>q</sup>-wat**) is ca. 3 kcal·mol<sup>-1</sup> stabilized over the radical intermediate (**Int1<sup>q</sup>-wat**) by the presence of the hydrogen bonding water molecule. The electronic structure of both intermediates is maintained in the presence of the water molecule, having a Mulliken charges and spin density ( $\rho$ ) distribution similar to those reported in **Figure S1**. Attempts to optimize **Int1<sup>d</sup>-wat** in the doublet state were unsuccessful, leading to epoxide formation.

**Figure S10:** Analysis of catalytically relevant near attack conformations (NAC) of styrene (**1**) accessible in P450<sub>LA1</sub> WT active site, from restrained-MD simulations. Five independent substrate-bound restrained-MD replicas of 500 ns each (2,500 ns total) are carried out.

**A)** Two different geometric parameters that describe the relative orientation of the substrate in the active site are analyzed:  $|\angle\text{Fe-O-C1-C2}|$  absolute dihedral angle that describes the relative orientation of the C1-C2 double bond with respect to the Fe-oxo;  $\angle\text{O-C1-C2-C(Ph)}$  dihedral angle describes which substrate enantioface is exposed to the Fe-oxo (*si* face that would lead to *R*-epoxide is characterized by negative values; *re* face that would lead to *S*-epoxide face is characterized by positive values). Dihedral angles and simulation time are given in deg., and ns, respectively.

**B)** Relative NAC conformations explored by styrene in P450<sub>LA1</sub> active site along the MD replicas as defined by  $|\angle\text{Fe-O-C1-C2}|$  and  $\angle\text{O-C1-C2-C(Ph)}$  dihedral angles.

**C)** Representative snapshots describing the major NAC conformations explored by styrene (**1**) in P450<sub>LA1</sub> active site as characterized from restrained-MD simulations. Star markers in B) describe each snapshot on the respective MD replica plot.

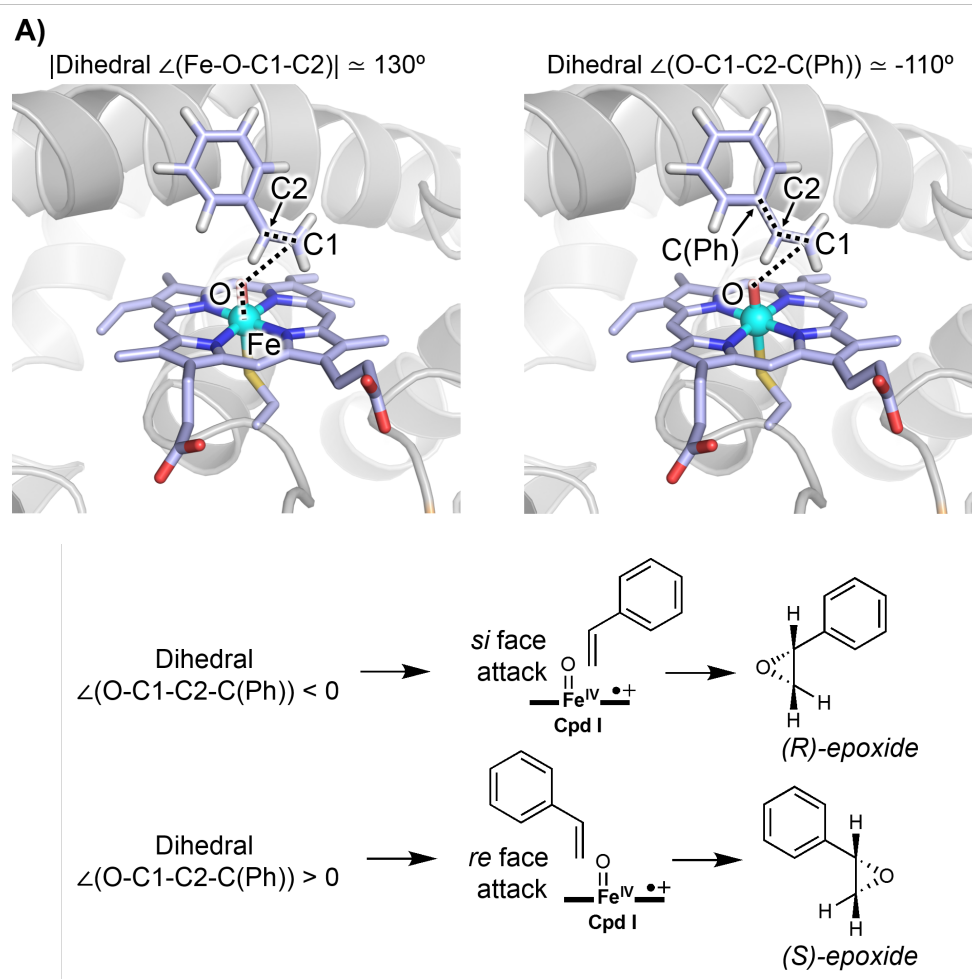



**B)**

*All replicas*

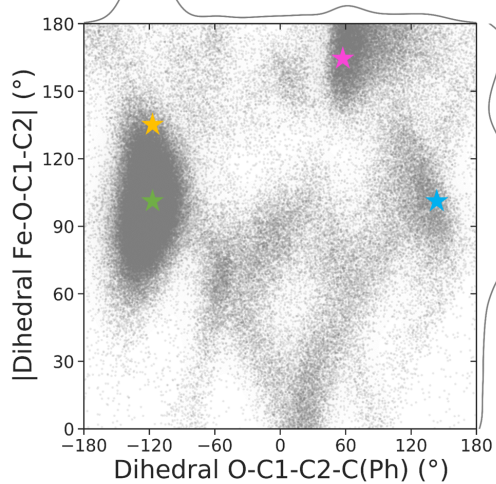

*Replica 1*

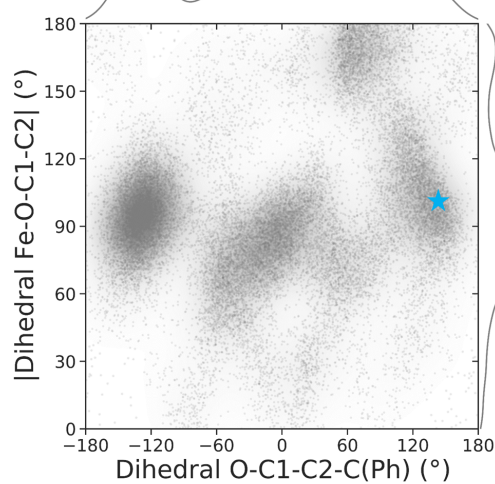

*Replica 2*

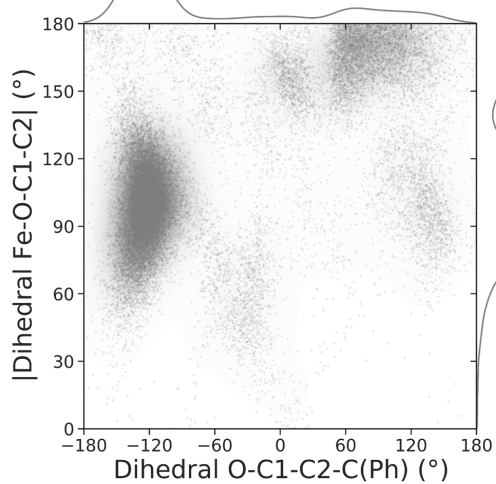

*Replica 3*

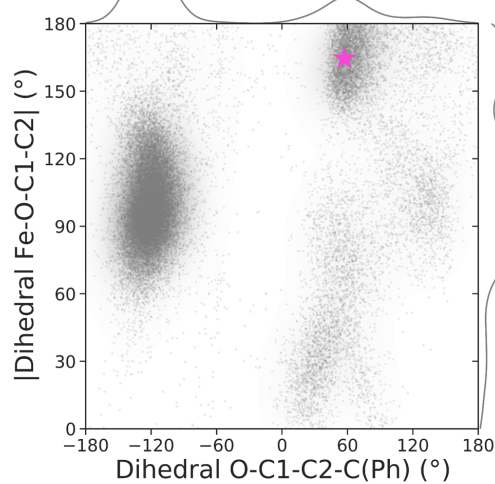

*Replica 4*

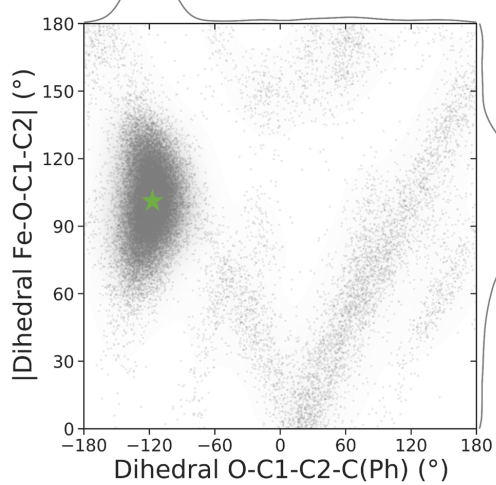

*Replica 5*

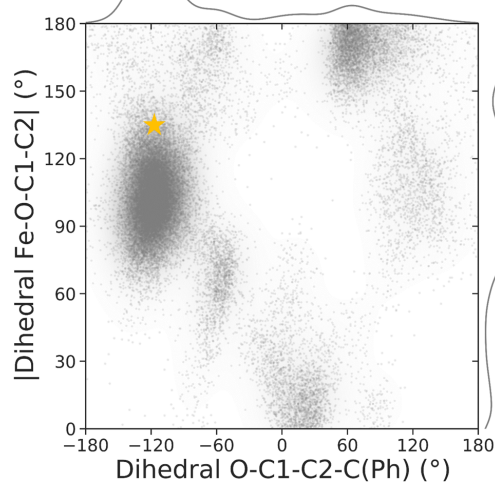

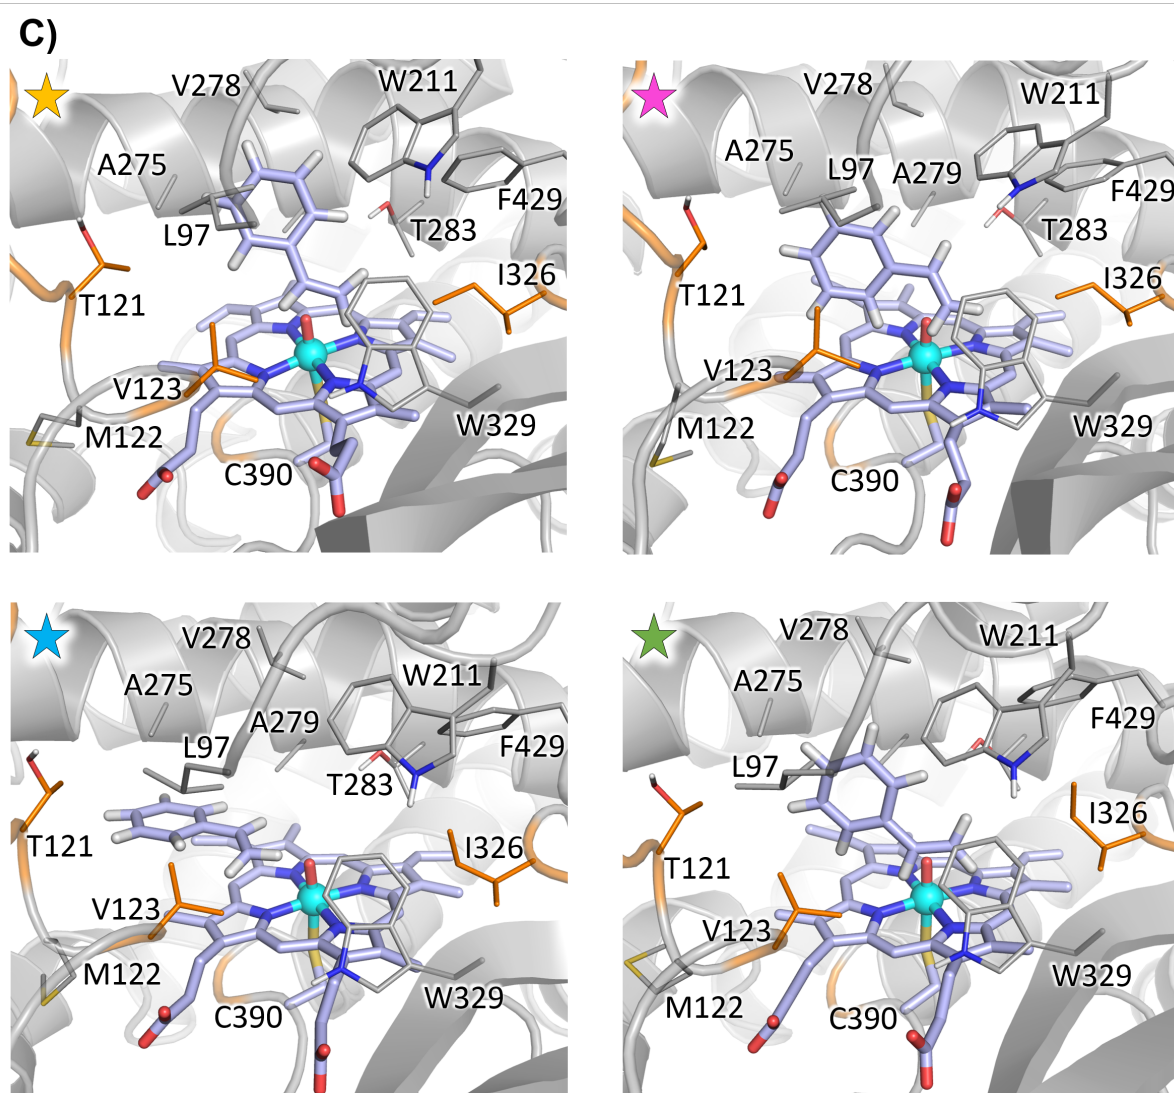

Styrene-bound restrained-MD simulations show that the substrate preferentially explores near-attack conformations (NAC) in P450<sub>LA1</sub> enzyme that expose the *si* enantioface (negative values for the  $\angle\text{O-C1-C2-C(Ph)}$  dihedral) as shown in **B**. Catalytically relevant binding poses explored by the substrate along restrained-MD simulations are in agreement with the accessible active site volume characterized from holo state simulations in **Figure S7**. Most of the binding poses explored by the substrate have the phenyl group of styrene oriented to the left-handed side of the active site (front view), opposite from the bulky residues W211, F429, I236 and W329 located on the right side of the active site. Binding poses exhibiting *si* enantioface exposed to the iron-oxo species have the substrate C1-C2 double bond orthogonal to the iron oxo moiety (see green and yellow star marker snapshots in **C**) with dihedral angle  $|\angle\text{Fe-O-C1-C2}|$  values comprised between  $75^\circ$  and  $135^\circ$ . Minor binding poses with *re* enantioface exposed to the iron-oxo species (see pink star marker snapshot in **C**) have the C1-C2 double bond in a more parallel orientation with respect to the Fe=O axis, described by dihedral angle  $|\angle\text{Fe-O-C1-C2}|$  values larger than  $150^\circ$ . Binding poses corresponding to the blue star marker are considered as non-reactive due to bad alignment of the *pi* system of the alkene and the iron-oxo species.

**Figure S11:** Analysis of catalytically relevant near attack conformations (NAC) of styrene (**1**) accessible in aMOx variant active site, from restrained-MD simulations. Five independent substrate-bound restrained-MD replicas of 500 ns each (2,500 ns total) are carried out.

**A)** Two different geometric parameters that describe the relative orientation of the substrate in the active site are analyzed:  $|\angle\text{Fe-O-C1-C2}|$  absolute dihedral angle that describes the relative orientation of the C1-C2 double bond with respect to the Fe-oxo;  $\angle\text{O-C1-C2-C(Ph)}$  dihedral angle describes which substrate enantioface is exposed to the Fe-oxo (*si* face that would lead to *R*-epoxide is characterized by negative values; *re* face that would lead to *S*-epoxide face is characterized by positive values). Dihedral angles and simulation time are given in deg., and ns, respectively.

**B)** Relative NAC conformations explored by styrene in aMOx variant active site along the MD replicas as defined by  $|\angle\text{Fe-O-C1-C2}|$  and  $\angle\text{O-C1-C2-C(Ph)}$  dihedral angles.

**C)** Representative snapshots describing the major NAC conformations explored by styrene (**1**) in aMOx variant active site as characterized from restrained-MD simulations. Star markers in B) describe each snapshot on the respective MD replica plot.

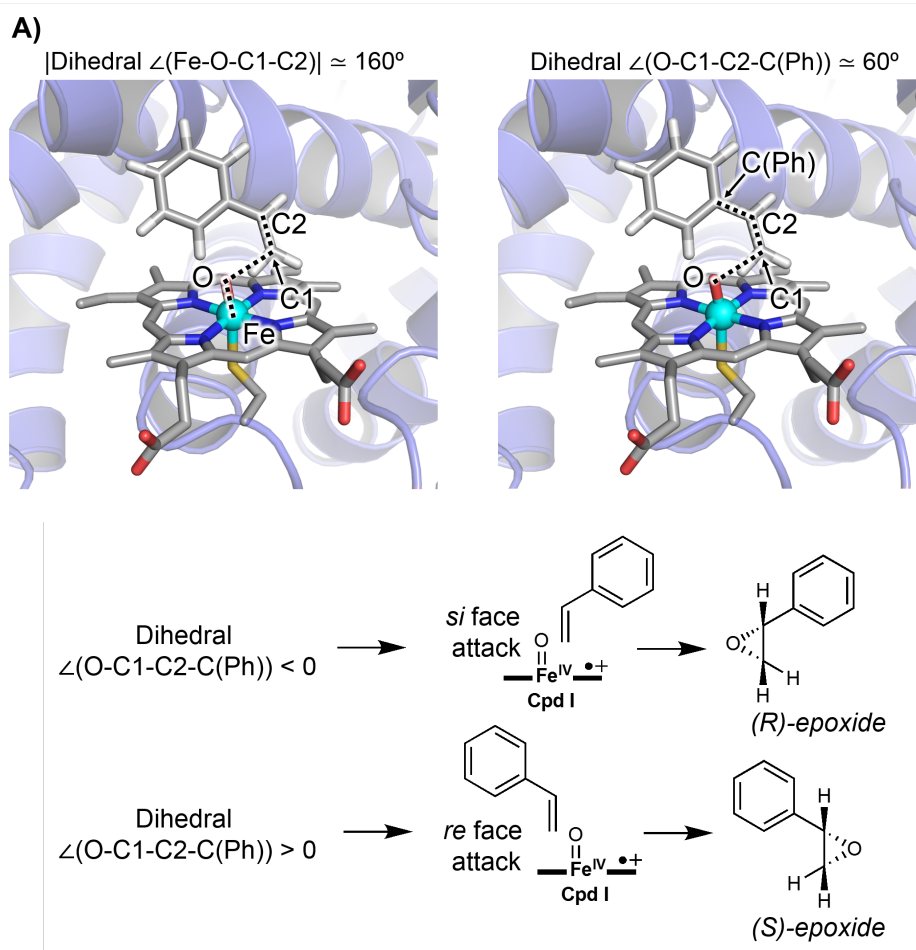

**B)**

*All replicas*

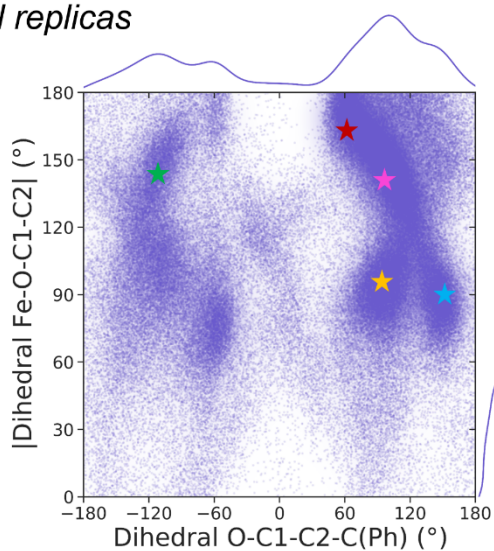

*Replica 1*

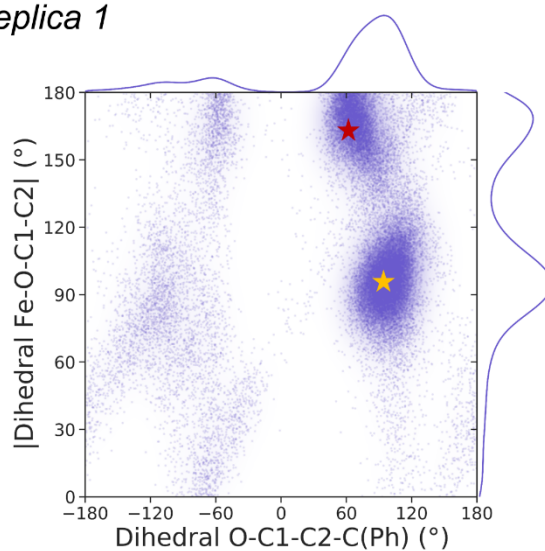

*Replica 2*

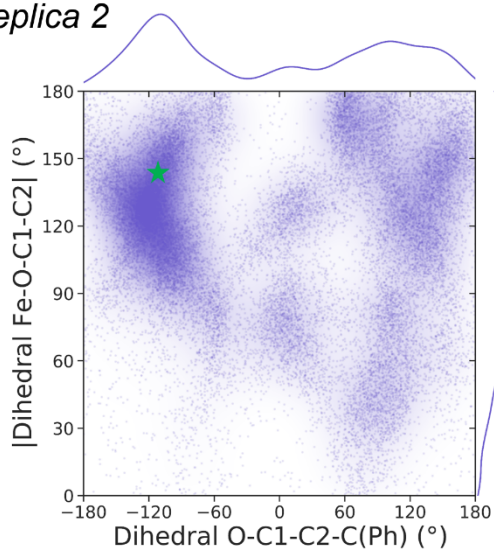

*Replica 3*

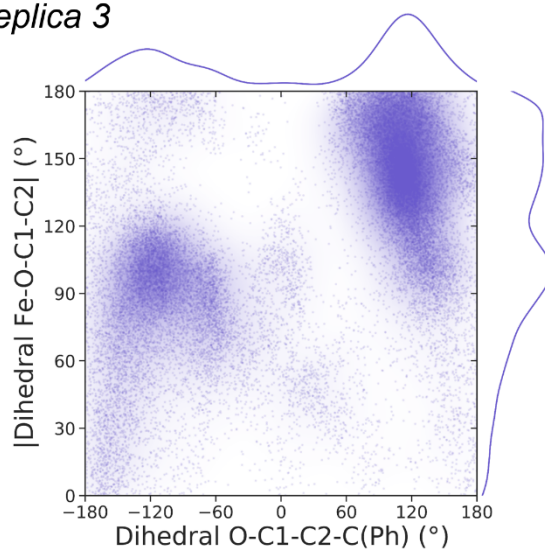

*Replica 4*

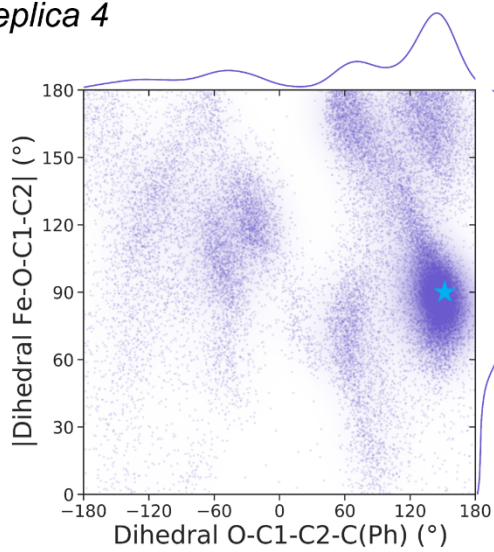

*Replica 5*

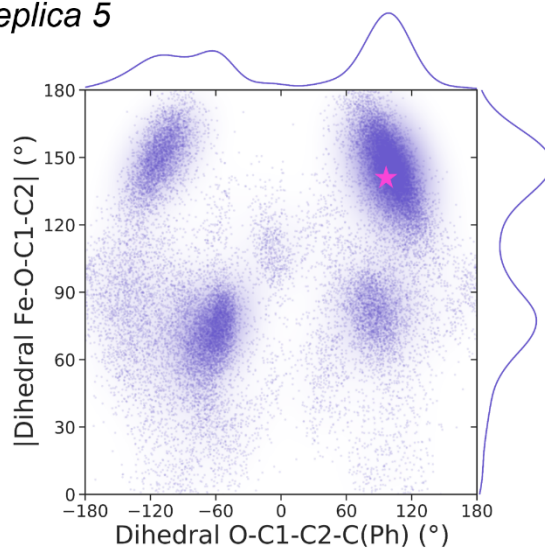

C)

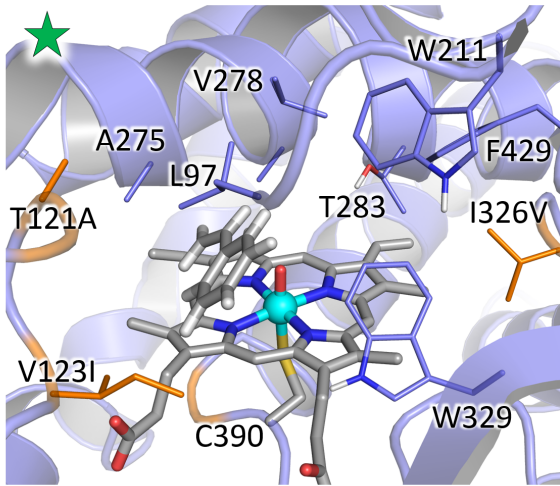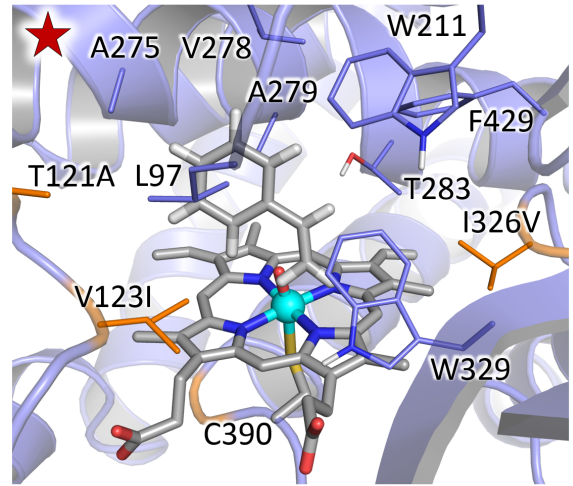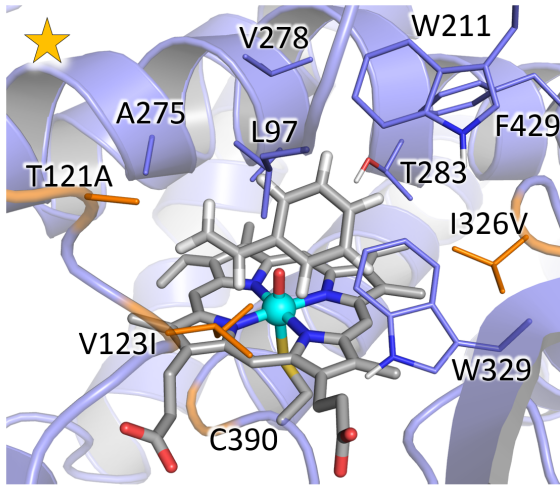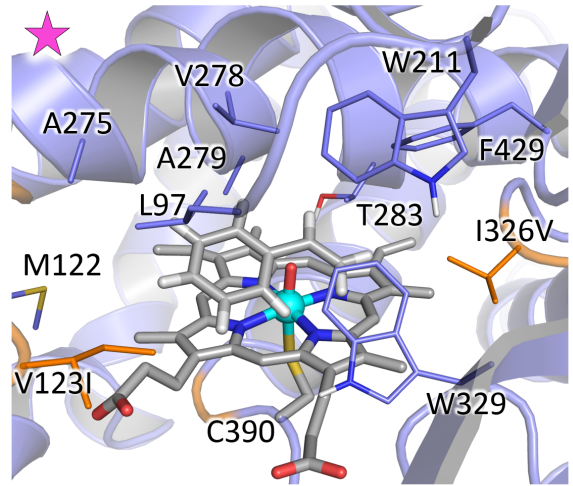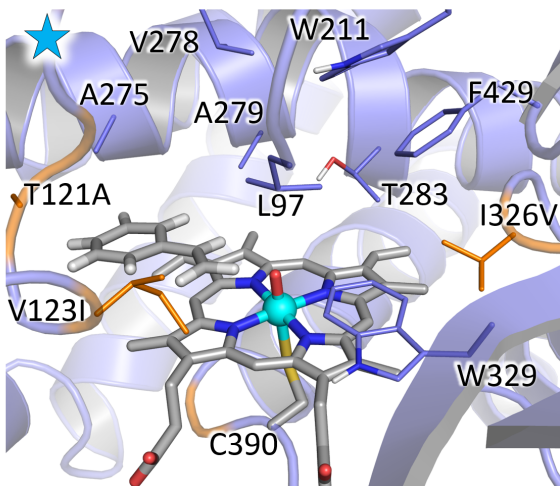

Styrene bound restrained-MD simulations describe that, in aMOx evolved active site, the substrate preferentially explores catalytically relevant binding poses (near attack conformations, NAC) exposing its *re* face to the iron-oxo species. This is defined by the preferential exploration of positive values of the  $\angle\text{O-C1-C2-C(Ph)}$  dihedral angle (**B**) and would lead to the formation of the *S*-epoxide product. These different NAC binding modes observed in aMOx as compared to P450<sub>LA1</sub> WT enzyme described in **Figure S10**, can be attributed to the reshaping of the active site cavity caused by protein evolution (**Figure S7**).

Preferential, catalytically relevant, NAC binding poses of styrene in aMOx active site are described by the red and pink star marker representative snapshots (shown in **C**), both exposing the *re* enantioface to the iron-oxo, and having the C1-C2 double bond oriented parallel to the Fe=O axis (defined by a large value of the  $|\angle\text{Fe-O-C1-C2}|$  dihedral angle). This parallel relative orientation would facilitate O-C1 bond formation, as opposite to alternative NAC binding poses described by the yellow star marker representative snapshot. I326V mutation facilitates the positioning of the terminal methyldene group (CH<sub>2</sub>=) in this region of the active site. The position that styrene occupies in the aMOx active site in these two catalytically relevant binding poses (red and pink star marker representative snapshots), matches the accessible active site volume characterized from *holo* state aMOx MD simulations (**Figure S7**). Within these NAC binding poses, the phenyl ring of the substrate is oriented to the left-handed of the active site (from a front view), opposite to the bulky residues (W211, W329, F429) that are located on the right-handed side of the active site pocket. Styrene phenyl ring is stabilized in these catalytically relevant binding modes by hydrophobic interactions with L97, V123I, V278 and A279.

Minor NAC binding modes orienting the *si* face of styrene to the iron-oxo species, are described by the green star marker representative snapshot (**C**). There, the phenyl group of styrene still occupies a similar position in the active site than in the *re* face oriented binding poses (see pink marker snapshot), but with the terminal olefin oriented to the opposite side of the active site pocket. Binding poses corresponding to the blue star marker are considered as non-reactive due to bad alignment of the *pi* system of the alkene and the iron-oxo species.

**Figure S12:** Analysis of catalytically relevant near attack conformations (NAC) of styrene (**1**) accessible in P7 active site (T121A, N201K, N209S, Y385H, E418G) from restrained-MD simulations. Five independent substrate-bound restrained-MD replicas of 500 ns each (2,500 ns total) are carried out.

**A)** Two different geometric parameters that describe the relative orientation of the substrate in the active site are analyzed:  $|\angle\text{Fe-O-C1-C2}|$  absolute dihedral angle that describes the relative orientation of the C1-C2 double bond with respect to the Fe-oxo;  $\angle\text{O-C1-C2-C(Ph)}$  dihedral angle describes which substrate enantioface is exposed to the Fe-oxo (*si* face that would lead to *R*-epoxide is characterized by negative values; *re* face that would lead to *S*-epoxide face is characterized by positive values). Dihedral angles and simulation time are given in deg., and ns, respectively.

**B)** Relative NAC conformations explored by styrene in P7 active site along the MD replicas as defined by  $|\angle\text{Fe-O-C1-C2}|$  and  $\angle\text{O-C1-C2-C(Ph)}$  dihedral angles.

**C)** Representative snapshots describing the major NAC conformations explored by styrene (**1**) in P7 active site as characterized from restrained-MD simulations. Star markers in B) describe each snapshot on the respective MD replica plot.

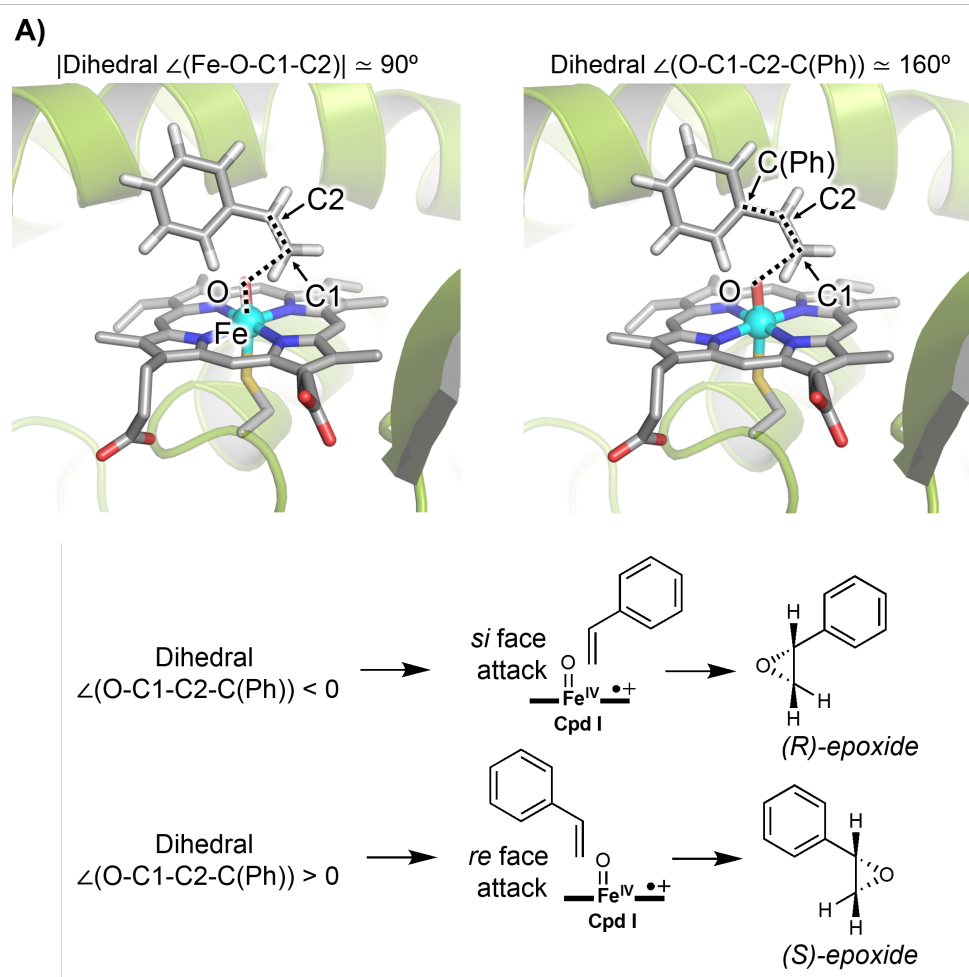

**B)**

*All replicas*

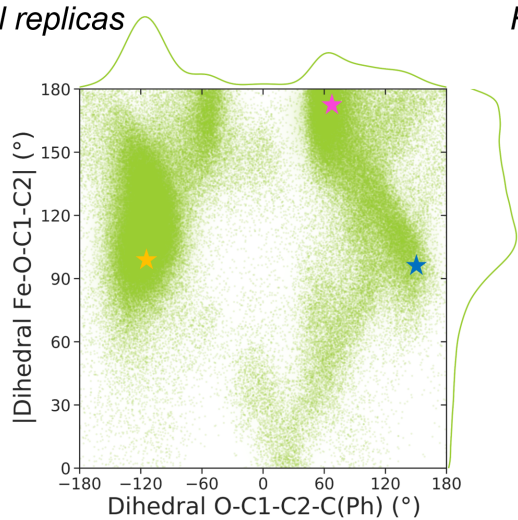

*Replica 1*

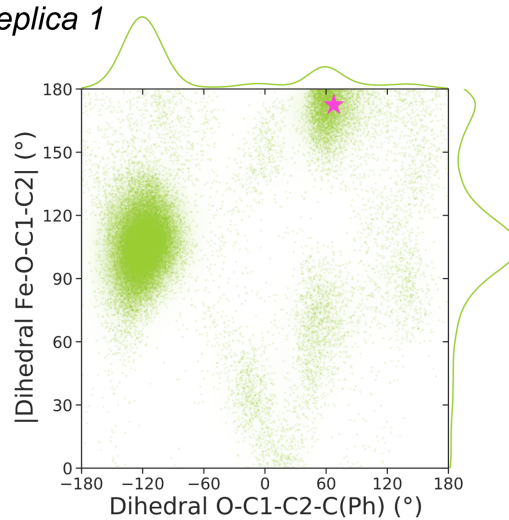

*Replica 2*

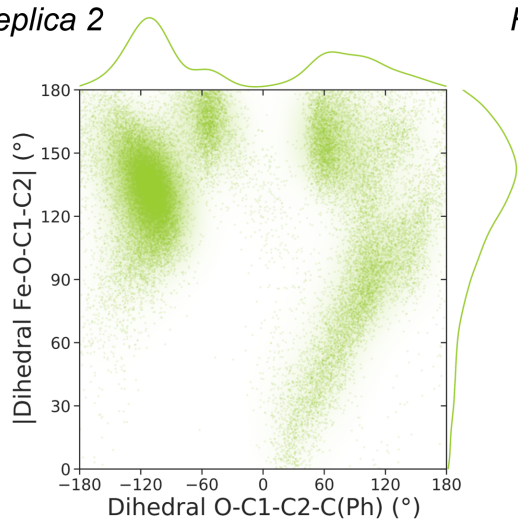

*Replica 3*

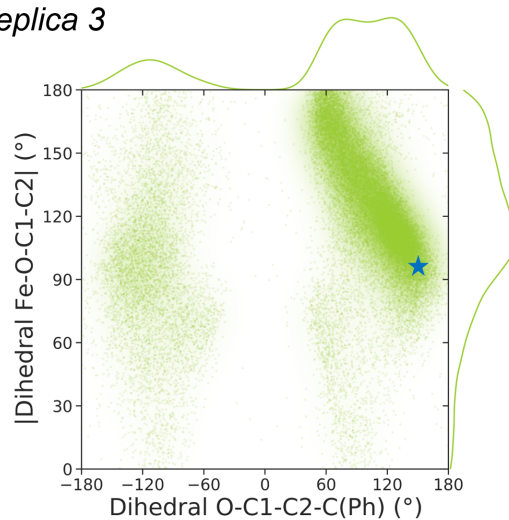

*Replica 4*

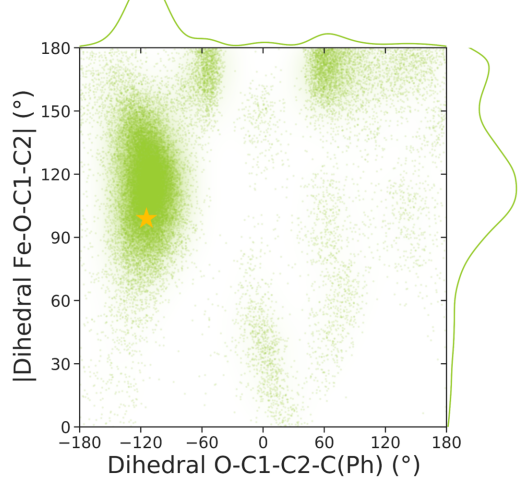

*Replica 5*

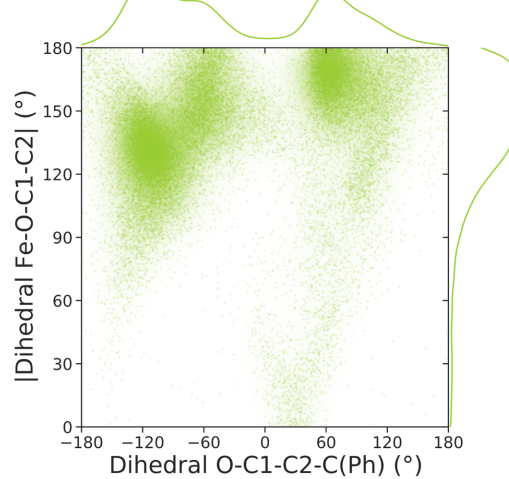



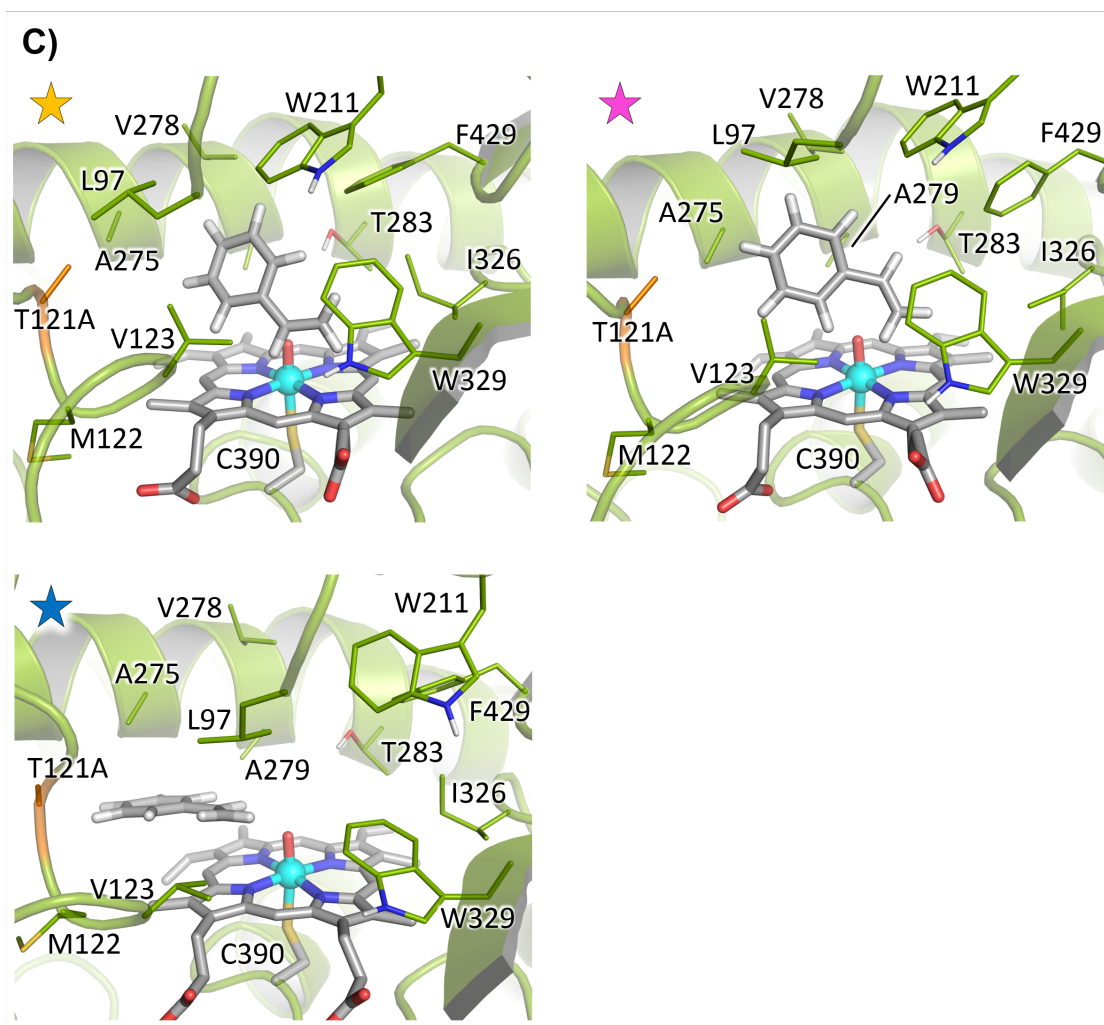

Styrene-bound restrained-MD simulations showed that in P7 variant styrene (**1**) substrate can effectively explore catalytically relevant binding modes in which the *re* face (pro-*S* epoxidation, pink star in **C**) is exposed to the iron-oxo species more frequently than in the WT (see **Figure S10**). However, *si* face catalytically active binding modes are still easily explored (negative values for the  $\angle\text{O-C1-C2-C(Ph)}$  dihedral as shown in **B**, see yellow star in **C**). This is in line with the higher epoxide (*S*)-selectivity exhibited by P7 variant (ca. 50% (*S*)-epoxide, **Figure 4E** from the main text) as compared to WT P450<sub>LA1</sub> (40% (*S*)-epoxide), and the lower selectivity as compared to aMOx variant (ca. 86% (*S*)-epoxide).

Consequently, these new simulations support the computationally identified reshaping of the active site during evolution and its impact on the preferential substrate binding mode and enzyme selectivity experimentally observed.

**Figure S13:** Conformational analysis based on MD simulations of the covalent radical intermediate (**Int1**) formed in **A)** P450<sub>LA1</sub> WT enzyme and **B)** aMOx variant. Two independent MD trajectories (500 ns each) were carried out for each system.

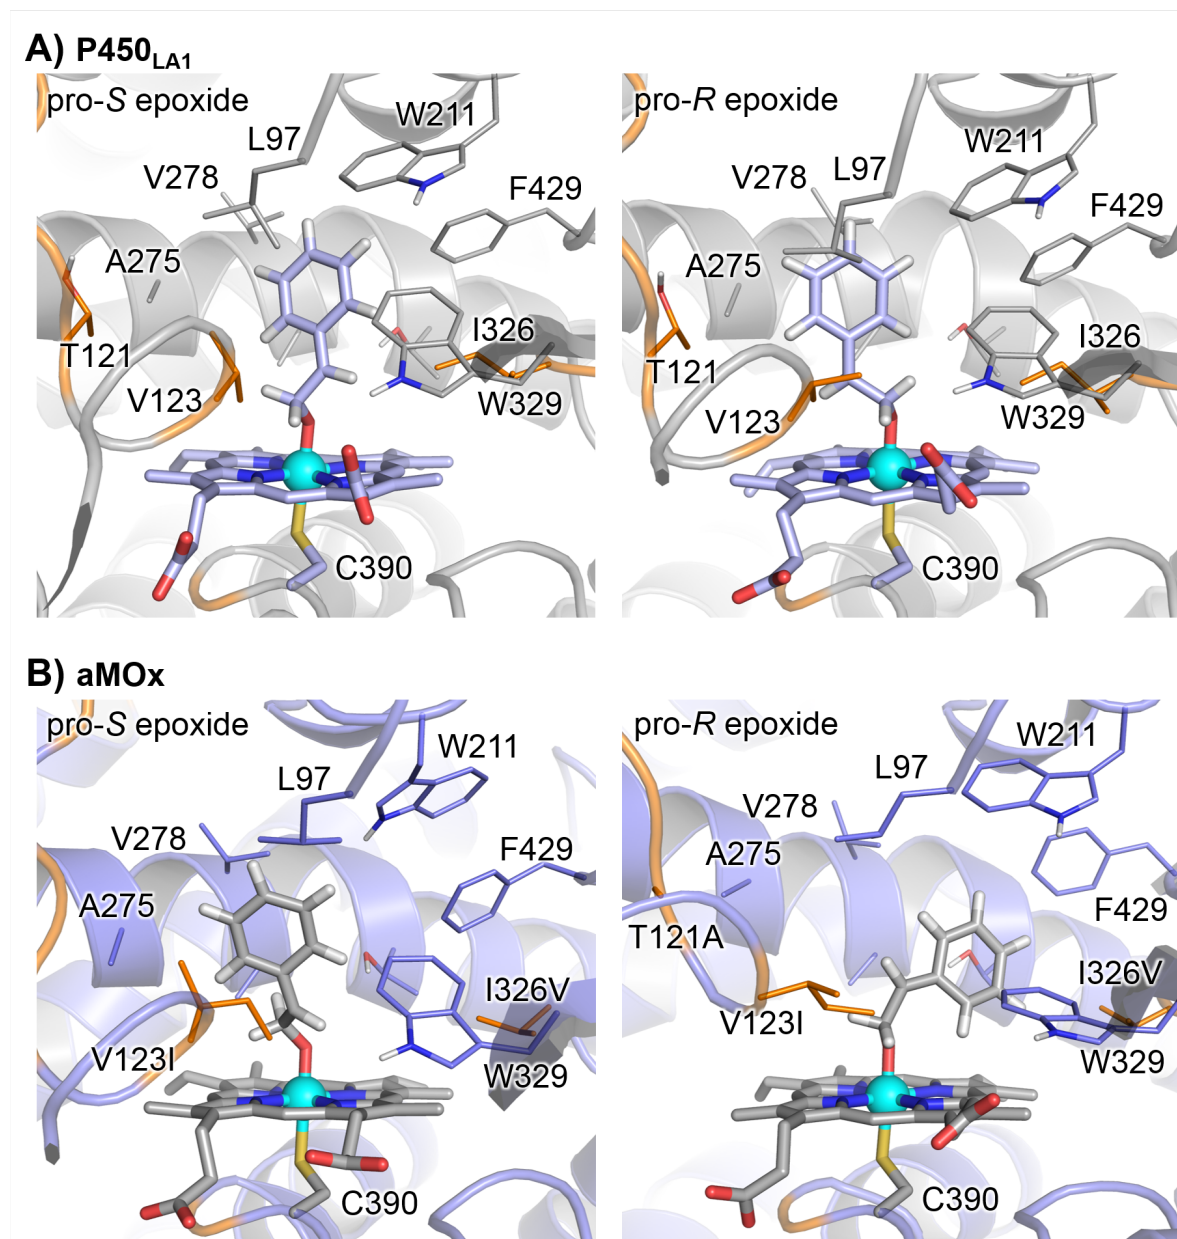

MD simulations were used to perform a conformational analysis of the covalent radical intermediate (**Int1**) when formed in P450<sub>LA1</sub> and aMOx active sites. Two representative snapshots for each variant, with the intermediate exploring pro-S and pro-R epoxidation conformations, were selected based on clustering analyses. These conformations are very similar to the major near attack conformations characterized from substrate-bound restrained-MD simulations (**Figures S10** and **S11**). The selected intermediate conformations were used as a starting point for QM/MM calculations.

v. **Computational modelling of the enzymatic reaction mechanisms using QM/MM calculations**

**Figure S14:** QM/MM exploration of P450<sub>LA1</sub> WT catalyzed oxidation of styrene (**1**) substrate. QM/MM calculations were carried out starting from a MD-relaxed structure of the covalent intermediate (**Int1**) formed in P450<sub>LA1</sub> active site (**Figure S13-A**), that mimics the minor explored, catalytically relevant, binding pose of styrene substrate characterized from restrained-MD simulations (pink marker selected snapshot in **Figure S10**). This corresponds to a styrene binding pose with its *re* face exposed to the iron-oxo species (pro-*S* epoxidation).

**A)** QM/MM computed relative stabilities in terms of electronic energy at the QM region ( $\Delta E_{\text{QM}}$ ), QM/MM ONIOM electronic energy ( $\Delta E$ ), enthalpy ( $\Delta H$ ), and Gibbs energy ( $\Delta G$ ) for the different optimized species. Energy values were obtained at the (U)B3LYP/Def2TZVP:AmberFF14SB/(U)B3LYP/6-31G(d)+SDD(Fe):AmberFF14SB level, with the same MM parameters used in MD simulations. An Electrostatic Embedding was used (see computational details). Doublet (d) and quartet (q) electronic states were considered, and all energies are referred considering the lowest in energy LA1-1<sup>q</sup> structure as zero.

**B)** QM/MM calculated Gibbs free energy profile. Relative Gibbs free energies ( $\Delta G$ ) and electronic energies ( $\Delta E$ , in parenthesis) are reported.

**C)** QM/MM optimized structures. Atoms included in the QM region are shown in ball-and-stick representation, and residues in the MM region are shown in sticks. Mutated residues are highlighted in orange. Mulliken charges ( $q$ ) and spin density ( $\rho$ ) values for the phenyl group (Ph, sum of all C and H atoms), C2 benzylic position, C1 and O, are reported.

Energies, distances, and Mulliken charges and spin density values are given in kcal·mol<sup>-1</sup>, Angstrom (Å), and a.u., respectively.

**A)**

| Structure        | Electronic State | $\Delta E_{\text{QM}}$ | $\Delta E$ | $\Delta H$ | $\Delta G$ |
|------------------|------------------|------------------------|------------|------------|------------|
| LA1-1            | doublet (d)      | 0.0                    | 0.0        | 0.0        | 0.2        |
|                  | quartet (q)      | 0.0                    | 0.0        | 0.0        | 0.0        |
| LA1-TS1          | doublet (d)      | 13.5                   | 17.5       | 16.9       | 19.3       |
|                  | quartet (q)      | 15.0                   | 18.8       | 17.5       | 19.1       |
| LA1-Int1         | doublet (d)      | -8.7                   | -3.4       | -3.3       | -1.2       |
|                  | quartet (q)      | -6.0                   | -4.7       | -4.1       | -3.6       |
| LA1-TS2          | quartet (q)      | -7.3                   | -2.8       | -2.6       | -1.6       |
| LA1-2-S          | doublet (d)      | -27.6                  | -20.6      | -18.0      | -14.9      |
|                  | quartet (q)      | -35.9                  | -23.0      | -20.5      | -19.2      |
| LA1-Int2         | doublet (d)      | -9.0                   | -4.0       | -3.8       | -1.0       |
|                  | quartet (q)      | -15.3                  | -3.2       | -3.6       | -2.4       |
| LA1-TS3-cis-re   | doublet (d)      | -5.2                   | 0.3        | -0.6       | 2.3        |
|                  | quartet (q)      | -14.0                  | -3.6       | -4.9       | -3.3       |
| LA1-TS3-trans-si | doublet (d)      | -7.2                   | -2.7       | -3.3       | 0.6        |
|                  | quartet (q)      | -13.5                  | -3.3       | -4.4       | -2.8       |
| LA1-3            | doublet (d)      | -54.4                  | -52.7      | -51.2      | -50.0      |
|                  | quartet (q)      | -64.1                  | -57.3      | -55.7      | -55.9      |

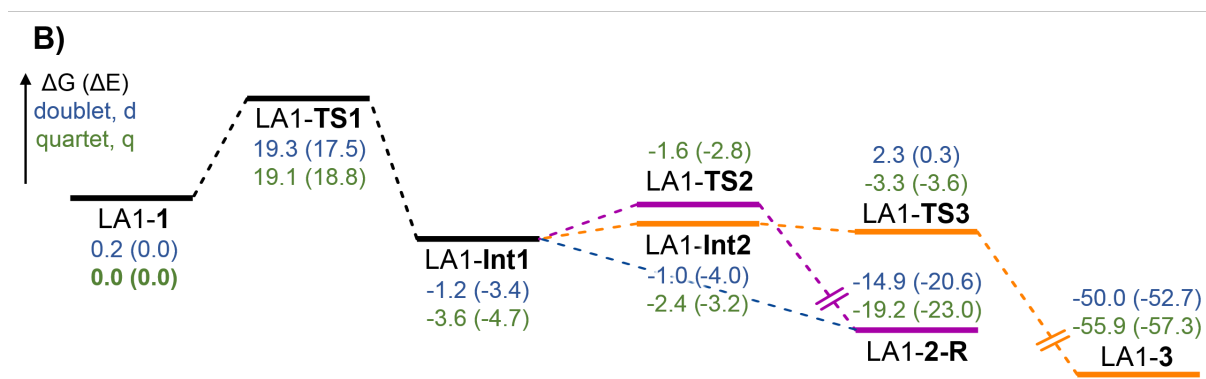

**C)**

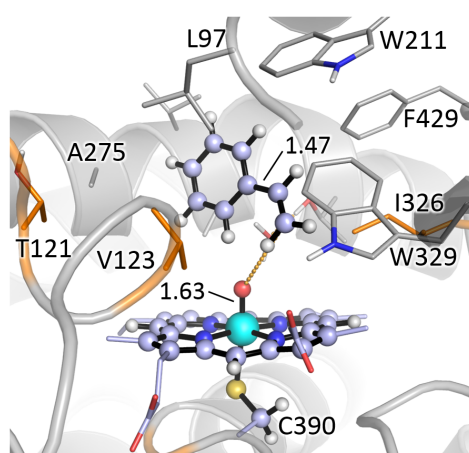

View 1

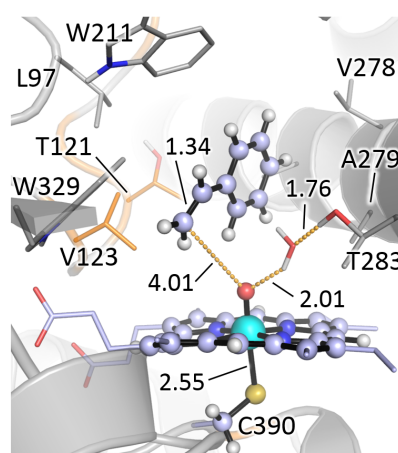

View 2

LA1-1<sup>d</sup>  
 $\Delta G = 0.2$  ( $\Delta E = 0.0$ )

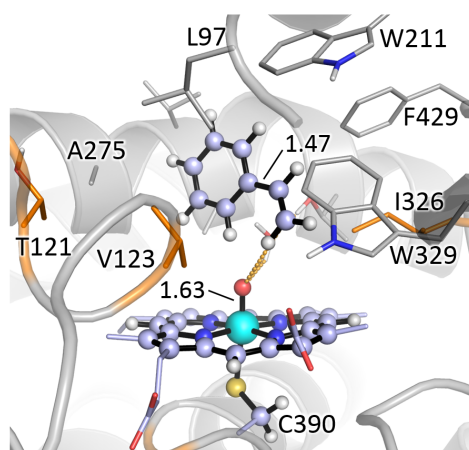

View 1

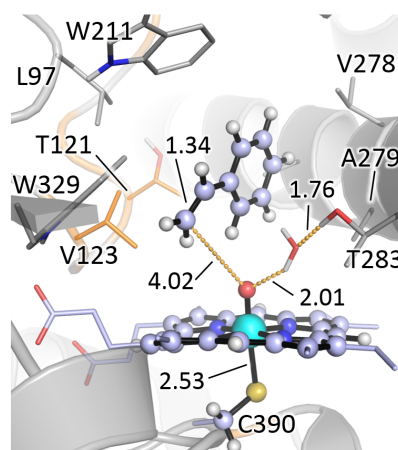

View 2

LA1-1<sup>a</sup>  
 $\Delta G = 0.0$  ( $\Delta E = 0.0$ )

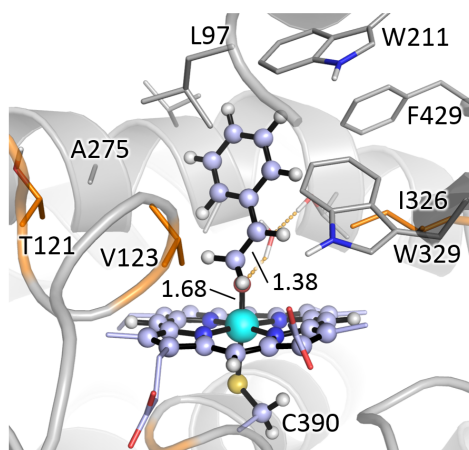

View 1

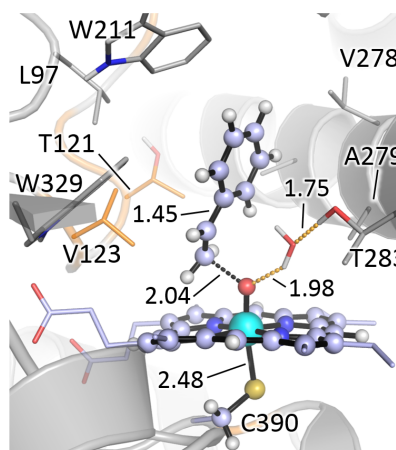

View 2

$$\begin{aligned} q(\text{Ph}) &= 0.05 \\ q(\text{C2}) &= -0.06 \\ q(\text{C1}) &= -0.16 \\ q(\text{O}) &= -0.51 \\ \rho(\text{Ph}) &= -0.11 \\ \rho(\text{C2}) &= -0.27 \\ \rho(\text{C1}) &= 0.00 \\ \rho(\text{O}) &= 0.25 \end{aligned}$$

**LA1-TS1<sup>d</sup>**  
 $\Delta G^\ddagger = 19.1$  ( $\Delta E^\ddagger = 17.5$ )

$|\angle \text{Fe-O-C1-C2}| = 142.4^\circ$

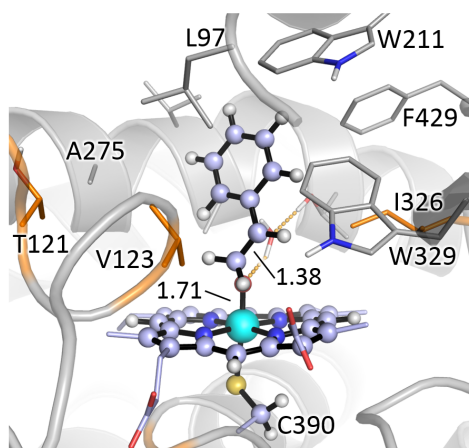

View 1

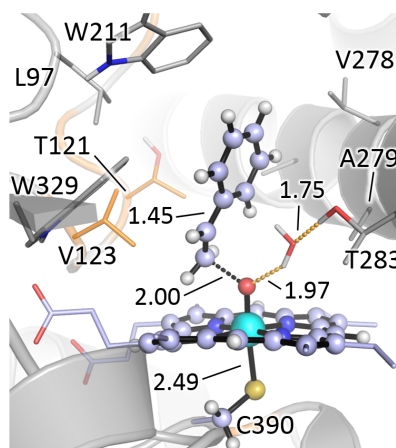

View 2

$$\begin{aligned} q(\text{Ph}) &= -0.01 \\ q(\text{C2}) &= -0.08 \\ q(\text{C1}) &= -0.16 \\ q(\text{O}) &= -0.49 \\ \rho(\text{Ph}) &= 0.11 \\ \rho(\text{C2}) &= 0.34 \\ \rho(\text{C1}) &= -0.09 \\ \rho(\text{O}) &= 0.65 \end{aligned}$$

**LA1-TS1<sup>q</sup>**  
 $\Delta G^\ddagger = 19.1$  ( $\Delta E^\ddagger = 18.8$ )

$|\angle \text{Fe-O-C1-C2}| = 143.1^\circ$

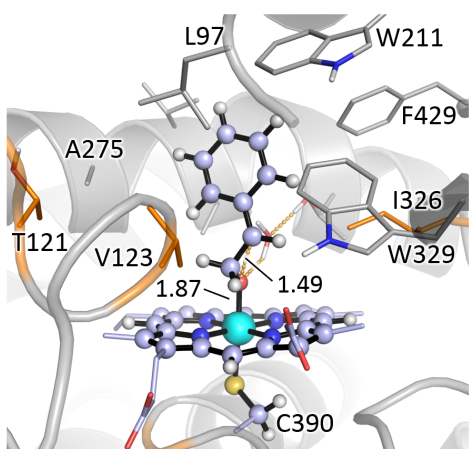

View 1

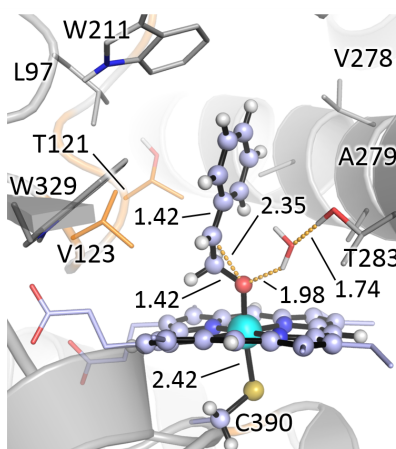

View 2

$$\begin{aligned} q(\text{Ph}) &= -0.02 \\ q(\text{C2}) &= -0.05 \\ q(\text{C1}) &= 0.01 \\ q(\text{O}) &= -0.52 \\ \rho(\text{Ph}) &= 0.23 \\ \rho(\text{C2}) &= 0.56 \\ \rho(\text{C1}) &= -0.01 \\ \rho(\text{O}) &= 0.05 \end{aligned}$$

**LA1-Int1<sup>d</sup>**  
 $\Delta G_r = -1.4$  ( $\Delta E_r = -3.4$ )  
 $\Delta \Delta G = 2.4$  ( $\Delta \Delta E = 1.3$ )

$$\begin{aligned} \angle \text{O-C1-C2-C(Ph)} &= 98.9^\circ \\ \angle \text{H-C1-C2-C(Ph)} &= -22.6^\circ \end{aligned}$$

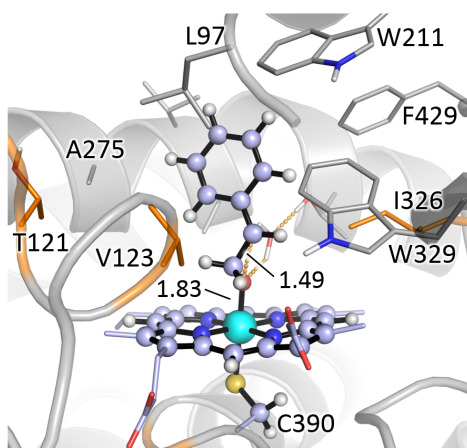

View 1

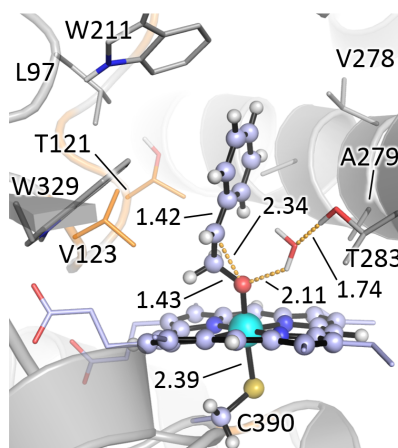

View 2

$$q(\text{Ph}) = -0.04$$

$$q(\text{C}2) = -0.09$$

$$q(\text{C}1) = -0.01$$

$$q(\text{O}) = -0.44$$

$$\rho(\text{Ph}) = 0.27$$

$$\rho(\text{C}2) = 0.65$$

$$\rho(\text{C}1) = 0.00$$

$$\rho(\text{O}) = 0.14$$

**LA1-Int1<sup>a</sup>**

$$\Delta G_r = -3.6 \ (\Delta E_r = -4.7)$$

$$\Delta \Delta G = 0.0 \ (\Delta \Delta E = 0.0)$$

$$\angle \text{O-C1-C2-C(Ph)} = 100.2^\circ$$

$$\angle \text{H-C1-C2-C(Ph)} = -20.5^\circ$$

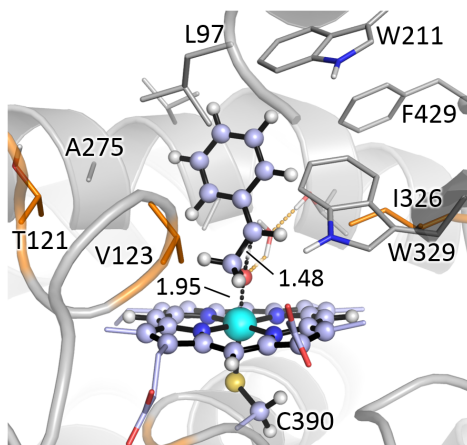

View 1

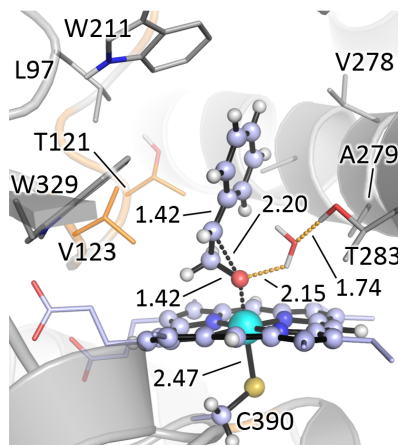

View 2

$$q(\text{Ph}) = 0.00$$

$$q(\text{C}2) = 0.00$$

$$q(\text{C}1) = 0.00$$

$$q(\text{O}) = 0.00$$

$$\rho(\text{Ph}) = 0.00$$

$$\rho(\text{C}2) = 0.00$$

$$\rho(\text{C}1) = 0.00$$

$$\rho(\text{O}) = 0.00$$

**LA1-TS2<sup>a</sup>**

$$\Delta G^\ddagger = 2.0 \ (\Delta E^\ddagger = 1.8)$$

$$\angle \text{O-C1-C2-C(Ph)} = 97.4^\circ$$

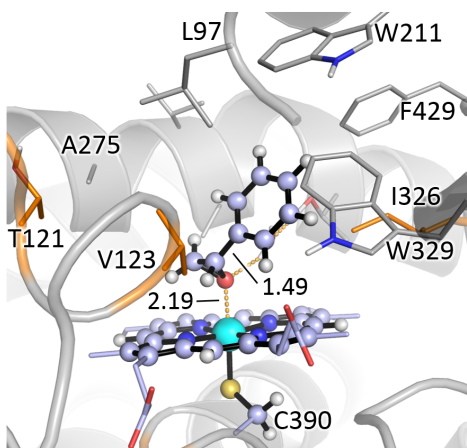

View 1

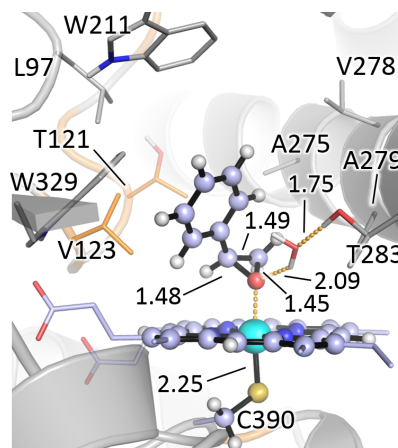

View 2

**LA1-2-S<sup>d</sup>**

$$\Delta G_r = -13.7 \ (\Delta E_r = -17.2)$$

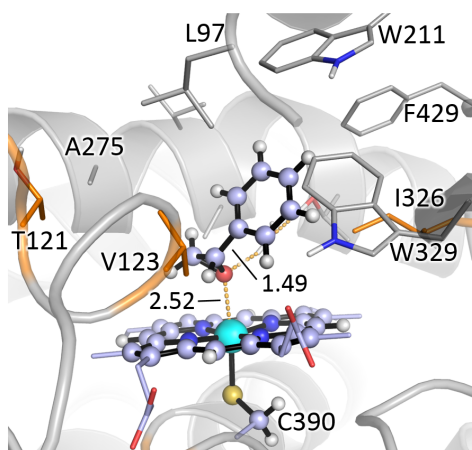

View 1

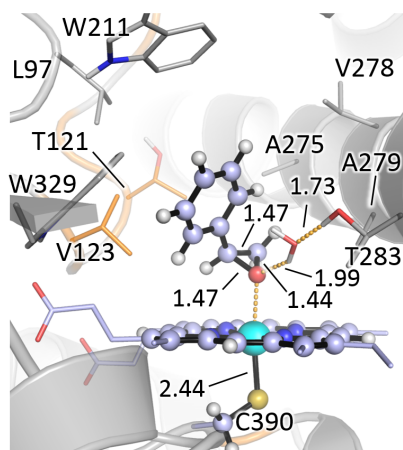

View 2

LA1-2-S<sup>a</sup>

$$\Delta G_r = -15.6 \text{ (}\Delta E_r = -18.3\text{)}$$

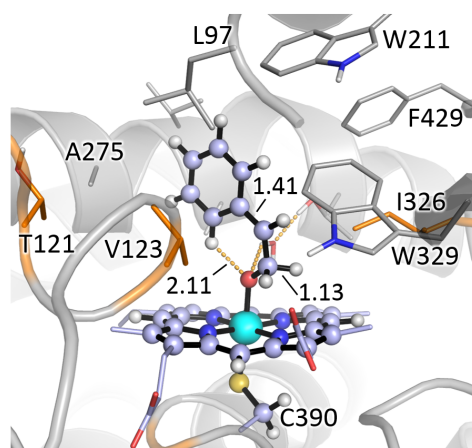

View 1

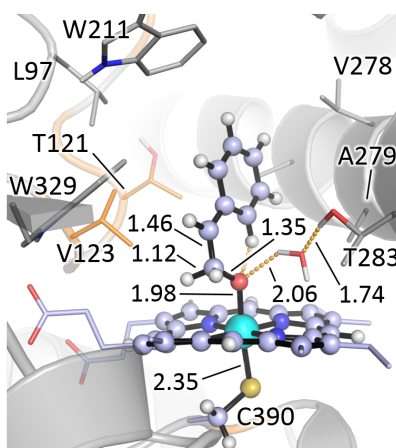

View 2

$$\begin{aligned} q(\text{Ph}) &= 0.27 \\ q(\text{C}2) &= -0.07 \\ q(\text{C}1) &= 0.03 \\ q(\text{O}) &= -0.58 \end{aligned}$$

$$\begin{aligned} \rho(\text{Ph}) &= -0.03 \\ \rho(\text{C}2) &= -0.08 \\ \rho(\text{C}1) &= 0.01 \\ \rho(\text{O}) &= 0.03 \end{aligned}$$

LA1-Int2<sup>d</sup>

$$\Delta\Delta G = 0.2 \text{ (}\Delta\Delta E = -0.6\text{)}$$

$$\angle \text{O-C1-C2-C(Ph)} = 7.1^\circ$$

$$\angle \text{H-C1-C2-C(Ph)} = -123.1^\circ$$

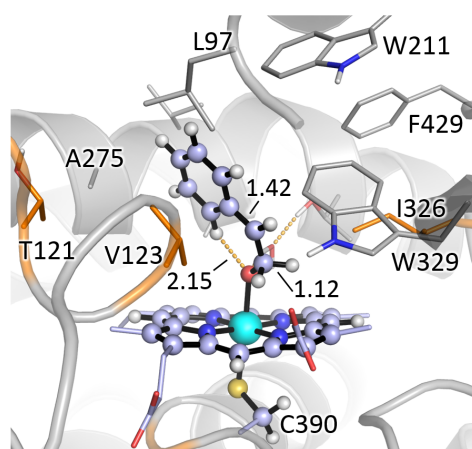

View 1

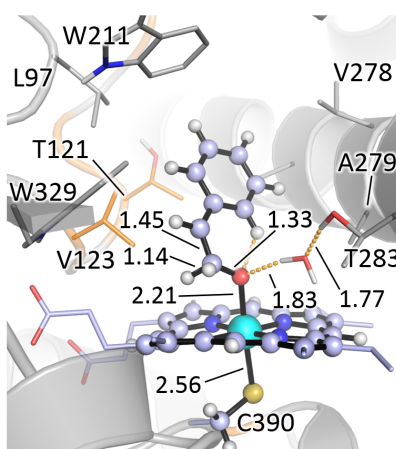

View 2

$$\begin{aligned} q(\text{Ph}) &= 0.29 \\ q(\text{C}2) &= -0.08 \\ q(\text{C}1) &= 0.07 \\ q(\text{O}) &= -0.66 \end{aligned}$$

$$\begin{aligned} \rho(\text{Ph}) &= 0.00 \\ \rho(\text{C}2) &= 0.00 \\ \rho(\text{C}1) &= 0.01 \\ \rho(\text{O}) &= 0.06 \end{aligned}$$

LA1-Int2<sup>a</sup>

$$\Delta\Delta G = 1.2 \text{ (}\Delta\Delta E = 1.5\text{)}$$

$$\angle \text{O-C1-C2-C(Ph)} = 4.8^\circ$$

$$\angle \text{H-C1-C2-C(Ph)} = -120.2^\circ$$

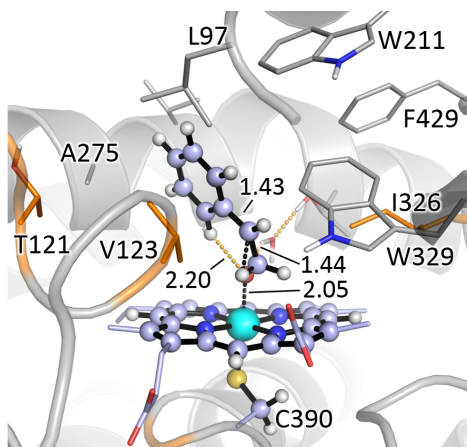

View 1

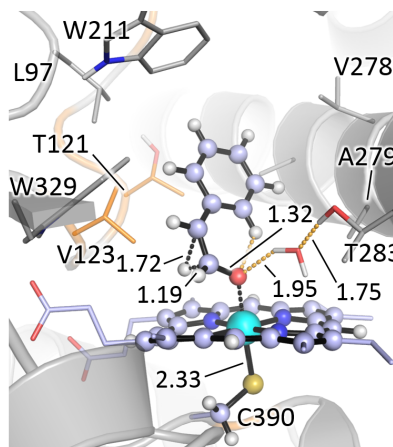

View 2

$$q(\text{Ph}) = 0.00$$

$$q(\text{C}2) = 0.00$$

$$q(\text{C}1) = 0.00$$

$$q(\text{O}) = 0.00$$

$$\rho(\text{Ph}) = 0.00$$

$$\rho(\text{C}2) = 0.00$$

$$\rho(\text{C}1) = 0.00$$

$$\rho(\text{O}) = 0.00$$

**LA1<sup>S</sup>-TS3-cis-re<sup>d</sup>**  
 $\Delta G^\ddagger = 3.3$  ( $\Delta E^\ddagger = 4.3$ )

$$\angle \text{H-C1-C2-C(Ph)} = -105.6^\circ$$

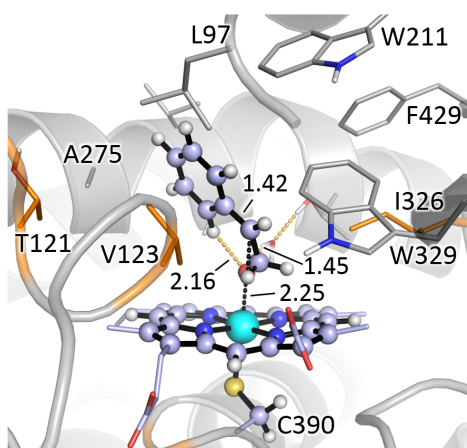

View 1

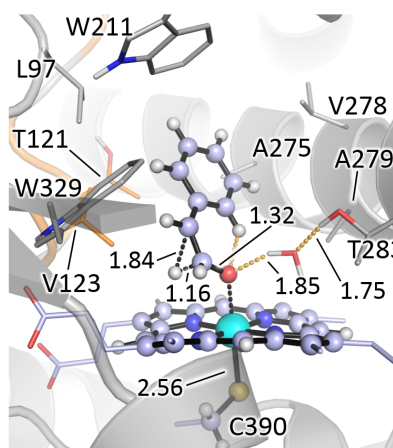

View 2

$$q(\text{Ph}) = 0.27$$

$$q(\text{C}2) = -0.08$$

$$q(\text{C}1) = 0.06$$

$$q(\text{O}) = -0.66$$

$$\rho(\text{Ph}) = 0.00$$

$$\rho(\text{C}2) = 0.00$$

$$\rho(\text{C}1) = 0.01$$

$$\rho(\text{O}) = 0.05$$

**LA1<sup>S</sup>-TS3-cis-re<sup>q</sup>**  
 $\Delta G^\ddagger = -0.9$  ( $\Delta E^\ddagger = -0.4$ )

$$\angle \text{H-C1-C2-C(Ph)} = -109.7^\circ$$

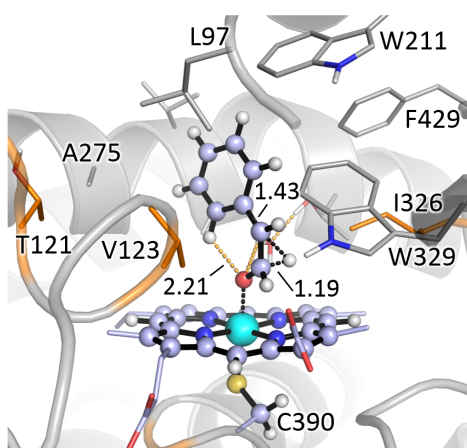

View 1

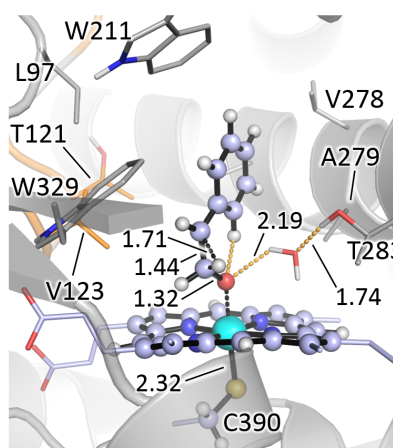

View 2

$$q(\text{Ph}) = 0.23$$

$$q(\text{C}2) = -0.09$$

$$q(\text{C}1) = 0.04$$

$$q(\text{O}) = -0.53$$

$$\rho(\text{Ph}) = 0.00$$

$$\rho(\text{C}2) = 0.00$$

$$\rho(\text{C}1) = 0.00$$

$$\rho(\text{O}) = 0.00$$

**LA1<sup>S</sup>-TS3-trans-si<sup>d</sup>**  
 $\Delta G^\ddagger = 1.6$  ( $\Delta E^\ddagger = 1.3$ )

$$\angle \text{H-C1-C2-C(Ph)} = 108.4^\circ$$



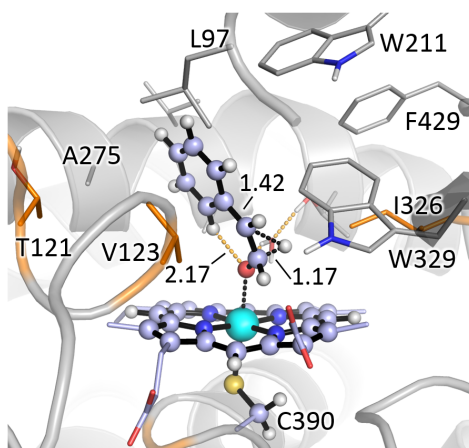

View 1

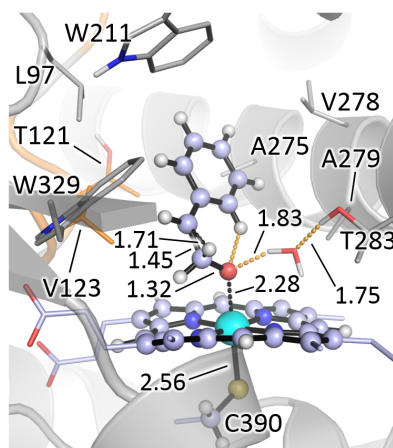

View 2

$$q(\text{Ph}) = 0.27$$

$$q(\text{C}2) = -0.09$$

$$q(\text{C}1) = 0.06$$

$$q(\text{O}) = -0.65$$

$$\rho(\text{Ph}) = 0.00$$

$$\rho(\text{C}2) = 0.00$$

$$\rho(\text{C}1) = 0.01$$

$$\rho(\text{O}) = 0.05$$

$$\text{LA1}^{\text{S-TS3-trans-si}^{\text{q}}}$$

$$\Delta G^{\ddagger} = -0.4 \ (\Delta E^{\ddagger} = -0.1)$$

$$\angle \text{H-C1-C2-C(Ph)} = 110.7^{\circ}$$

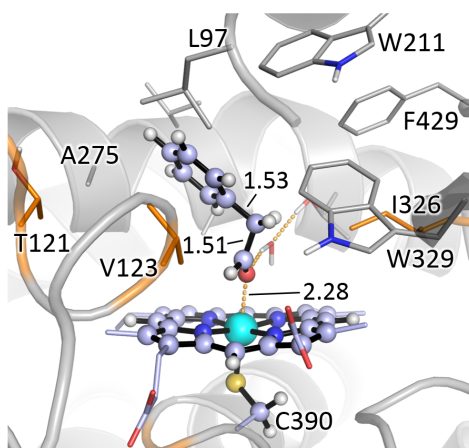

View 1

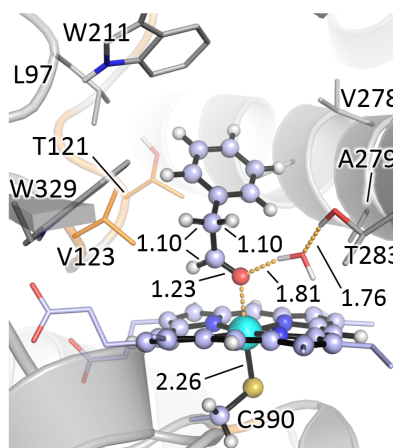

View 2

$$\text{LA1}^{\text{S-3}^{\text{d}}}$$

$$\Delta G_{\text{r}} = -49.0 \ (\Delta E_{\text{r}} = -48.7)$$

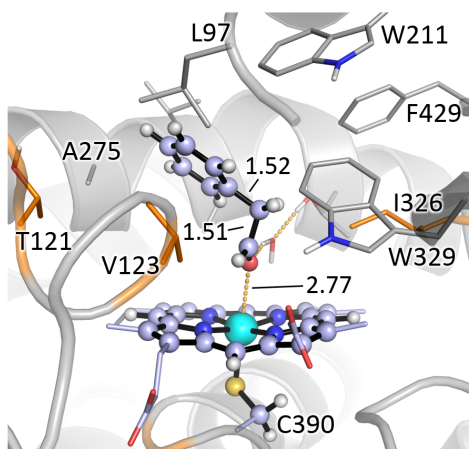

View 1

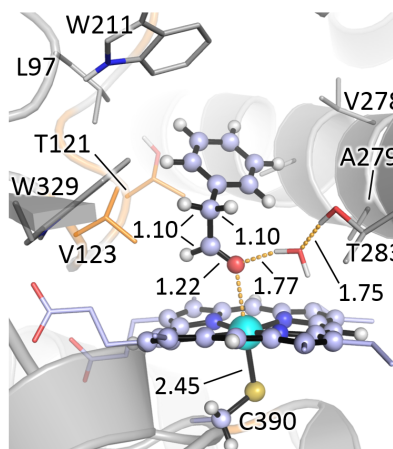

View 2

$$\text{LA1}^{\text{S-3}^{\text{q}}}$$

$$\Delta G_{\text{r}} = -53.6 \ (\Delta E_{\text{r}} = -54.1)$$

The particular substrate bound conformation in a catalytically relevant pose explored here, exposing the *re* face to the iron-oxo species, corresponds to the minor NAC binding pose characterized from MD simulations (see **Figure S10**). This particular binding mode leads to the formation of the *S*-epoxide product.

The calculated QM/MM pathways for the styrene epoxidation and carbonyl formation for this minor NAC binding mode are qualitatively equivalent to the ones calculated in **Figure S15** for the major NAC (*si* face exposed to the iron-oxo species) characterized from MD simulations (see **Figure S10**).

For the reaction occurring in P450<sub>LA1</sub> active site, the covalent radical intermediate LA1-**Int1** in the quartet and doublet electronic states can be optimized as a minimum on the potential energy surface (PES). This is indicating that the enzyme active site can stabilize these reactive intermediates due to confinement, as compared to the free-enzyme model system (see **Figure S1**).

Epoxidation pathway and carbonyl formation pathway are both energetically accessible and both pathways can compete, similar to enzyme-free system (see **Figure S1**). Epoxidation is slightly favored in the doublet state, being barrierless from LA1-**Int1**<sup>d</sup> (LA1-**TS2**<sup>d</sup> could not be optimized), and carbonyl formation is slightly favored in the quartet state after a required conformational change of LA1-**Int1**<sup>q</sup> to form LA1-**Int2**<sup>q</sup>.

QM/MM calculations for the aldehyde formation pathway describe a barrierless 1,2-hydride migration from LA1-**Int2**<sup>q</sup> intermediate, being the LA1-**TS3-cis-re** migration transition state favored over LA1-**TS3-trans-si** one.

**Figure S15:** QM/MM exploration of P450<sub>LA1</sub> WT catalyzed oxidation of styrene (**1**) substrate. QM/MM calculations were carried out starting from a MD-relaxed structure of the covalent intermediate (**Int1**) formed in P450<sub>LA1</sub> active site (**Figure S13-A**), that mimics the most populated, catalytically relevant, binding pose of styrene substrate characterized from restrained-MD simulations (green marker selected snapshot in **Figure S10**). This corresponds to a styrene binding pose with its *si* face exposed to the iron-oxo species (pro-*R* epoxidation).

**A)** QM/MM computed relative stabilities in terms of electronic energy at the QM region ( $\Delta E_{\text{QM}}$ ), QM/MM ONIOM electronic energy ( $\Delta E$ ), enthalpy ( $\Delta H$ ), and Gibbs energy ( $\Delta G$ ) for the different optimized species. Energy values were obtained at the (U)B3LYP/Def2TZVP:AmberFF14SB/(U)B3LYP/6-31G(d)+SDD(Fe):AmberFF14SB level, with the same MM parameters used in MD simulations. An Electrostatic Embedding was used (see computational details). Doublet (d) and quartet (q) electronic states were considered, and all energies are referred considering LA1-**1<sup>q</sup>** structure as zero.

**B)** QM/MM calculated Gibbs free energy profile. Relative Gibbs free energies ( $\Delta G$ ) and electronic energies ( $\Delta E$ , in parenthesis) are reported.

**C)** QM/MM optimized structures. Atoms included in the QM region are shown in ball-and-stick representation, and residues in the MM region are shown in sticks. Mutated residues are highlighted in orange. Mulliken charges ( $q$ ) and spin density ( $\rho$ ) values for the phenyl group (Ph, sum of all C and H atoms), C2 benzylic position, C1 and O, are reported.

Energies, distances, and Mulliken charges and spin density values are given in kcal·mol<sup>-1</sup>, Angstrom (Å), and a.u., respectively.

**A)**

| Structure        | Electronic State | $\Delta E_{\text{QM}}$ | $\Delta E$ | $\Delta H$ | $\Delta G$ |
|------------------|------------------|------------------------|------------|------------|------------|
| LA1-1            | doublet (d)      | -0.1                   | -0.1       | -0.2       | 0.1        |
|                  | quartet (q)      | 0.0                    | 0.0        | 0.0        | 0.0        |
| LA1-TS1          | doublet (d)      | 11.2                   | 16.3       | 14.8       | 16.1       |
|                  | quartet (q)      | 13.6                   | 15.8       | 14.7       | 15.8       |
| LA1-Int1         | doublet (d)      | -11.0                  | -5.6       | -5.8       | -3.9       |
|                  | quartet (q)      | -9.6                   | -7.2       | -7.0       | -6.0       |
| LA1-TS2          | doublet (d)      | -10.8                  | -5.3       | -5.5       | -4.0       |
|                  | quartet (q)      | -10.8                  | -5.3       | -5.5       | -4.0       |
| LA1-2-R          | doublet (d)      | -33.1                  | -26.6      | -25.0      | -23.9      |
|                  | quartet (q)      | -41.5                  | -33.4      | -31.9      | -32.3      |
| LA1-Int2         | doublet (d)      | -20.0                  | -9.9       | -10.4      | -7.3       |
|                  | quartet (q)      | -24.5                  | -7.7       | -8.8       | -8.2       |
| LA1-TS3-cis-si   | doublet (d)      | -19.6                  | -9.6       | -11.2      | -8.9       |
|                  | quartet (q)      | -24.0                  | -7.6       | -9.5       | -8.3       |
| LA1-TS3-trans-re | doublet (d)      | -18.2                  | -9.3       | -10.8      | -9.0       |
|                  | quartet (q)      | -23.2                  | -7.2       | -8.9       | -7.8       |
| LA1-3            | doublet (d)      | -64.4                  | -56.0      | -55.0      | -54.1      |
|                  | quartet (q)      | -72.6                  | -57.9      | -57.1      | -57.5      |

**B)**

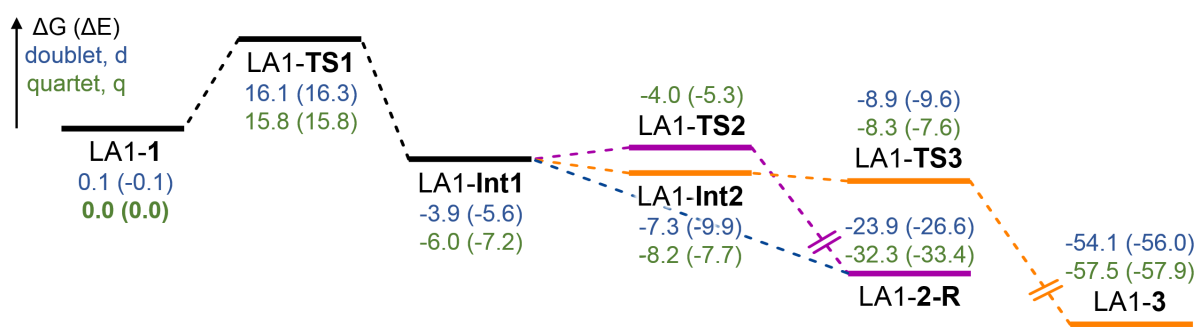

**C)**

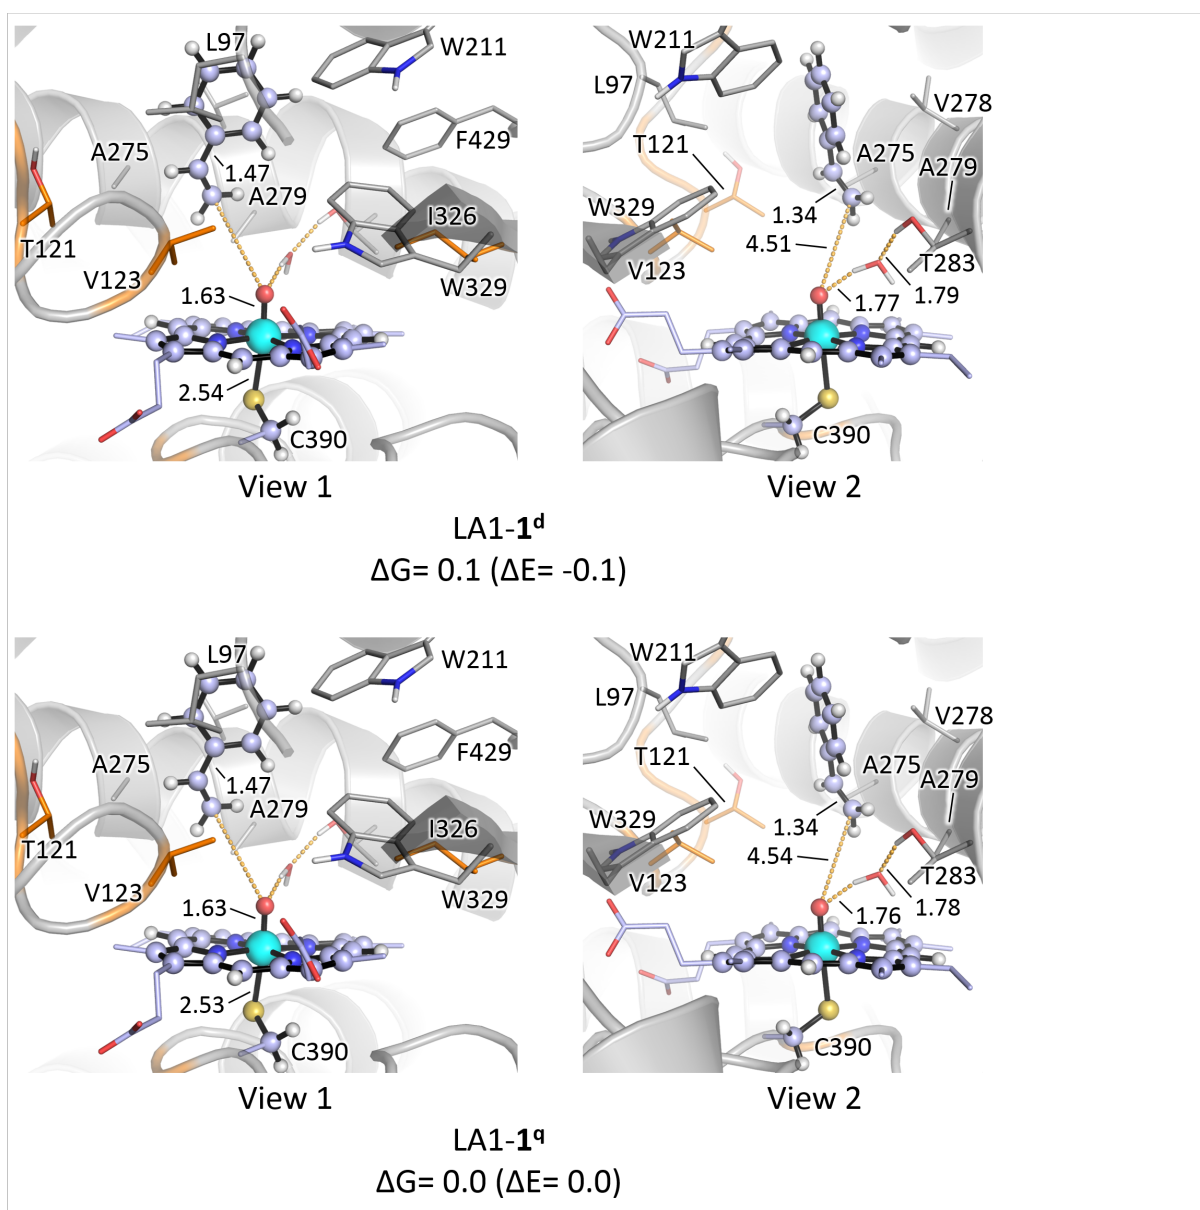

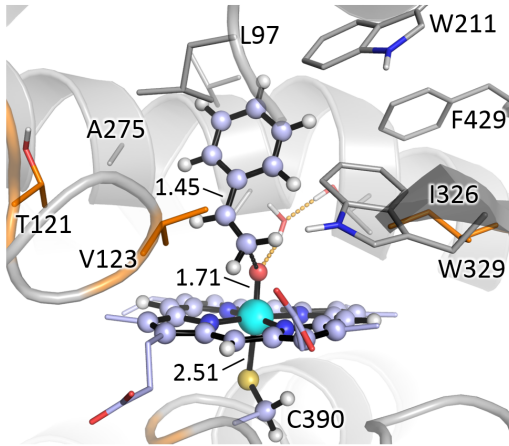

View 1

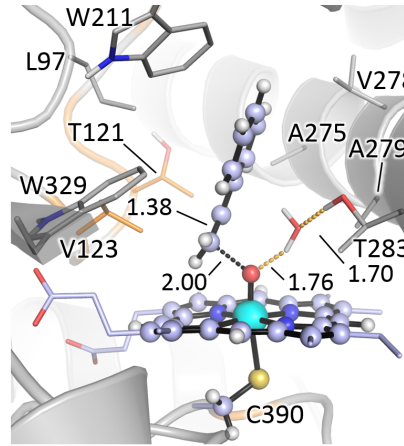

View 2

**LA1-TS1<sup>d</sup>**  
 $\Delta G^\ddagger = 16.0$  ( $\Delta E^\ddagger = 16.4$ )

$q(\text{Ph}) = 0.06$   
 $q(\text{C2}) = -0.03$   
 $q(\text{C1}) = -0.14$   
 $q(\text{O}) = -0.55$   
 $\rho(\text{Ph}) = -0.14$   
 $\rho(\text{C2}) = -0.35$   
 $\rho(\text{C1}) = 0.02$   
 $\rho(\text{O}) = 0.14$

$|\angle \text{Fe-O-C1-C2}| = 133.3^\circ$

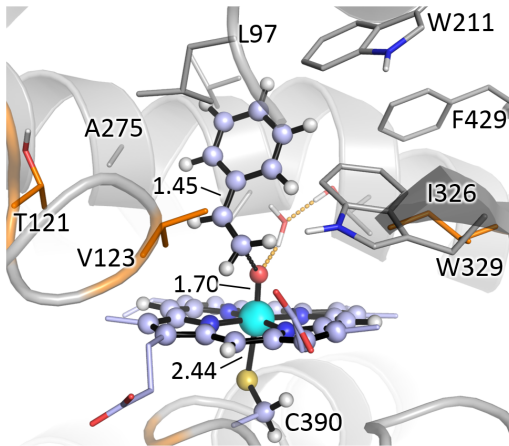

View 1

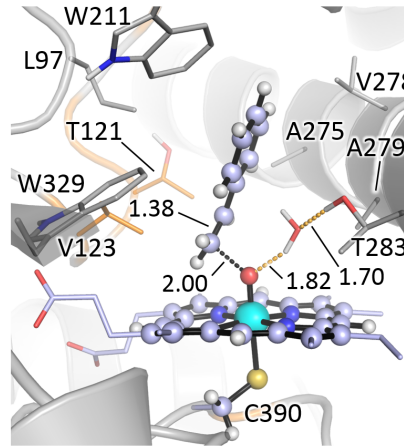

View 2

**LA1-TS1<sup>a</sup>**  
 $\Delta G^\ddagger = 15.8$  ( $\Delta E^\ddagger = 15.8$ )

$q(\text{Ph}) = 0.02$   
 $q(\text{C2}) = -0.07$   
 $q(\text{C1}) = -0.13$   
 $q(\text{O}) = -0.52$   
 $\rho(\text{Ph}) = 0.13$   
 $\rho(\text{C2}) = 0.35$   
 $\rho(\text{C1}) = -0.05$   
 $\rho(\text{O}) = 0.64$

$|\angle \text{Fe-O-C1-C2}| = 131.7^\circ$

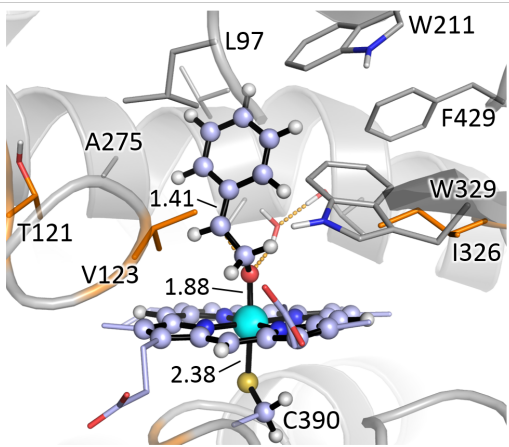

View 1

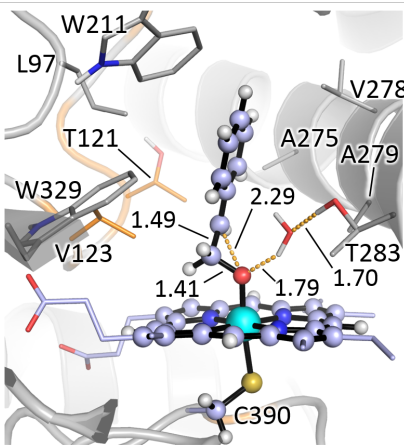

View 2

**LA1-Int1<sup>d</sup>**  
 $\Delta G_r = -4.0$  ( $\Delta E_r = -5.5$ )  
 $\Delta \Delta G = 2.1$  ( $\Delta \Delta E = 1.6$ )

$q(\text{Ph}) = 0.02$   
 $q(\text{C2}) = 0.00$   
 $q(\text{C1}) = -0.03$   
 $q(\text{O}) = -0.54$   
 $\rho(\text{Ph}) = 0.21$   
 $\rho(\text{C2}) = 0.50$   
 $\rho(\text{C1}) = -0.01$   
 $\rho(\text{O}) = 0.01$

$\angle \text{O-C1-C2-C(Ph)} = -107.0^\circ$   
 $\angle \text{H-C1-C2-C(Ph)} = 13.7^\circ$

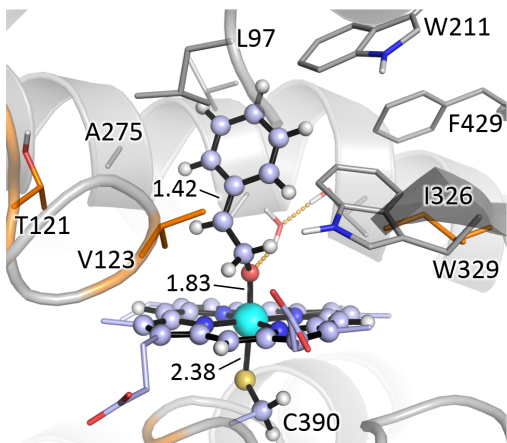

View 1

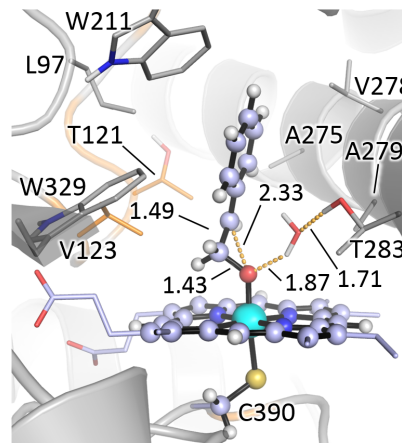

View 2

**LA1-Int1<sup>q</sup>**  
 $\Delta G_r = -6.0$  ( $\Delta E_r = -7.2$ )  
 $\Delta \Delta G = 0.0$  ( $\Delta \Delta E = 0.0$ )

$\angle O-C1-C2-C(Ph) = -108.4^\circ$   
 $\angle H-C1-C2-C(Ph) = 11.5^\circ$

$q(Ph) = -0.03$   
 $q(C2) = -0.07$   
 $q(C1) = -0.03$   
 $q(O) = -0.48$   
 $\rho(Ph) = 0.28$   
 $\rho(C2) = 0.65$   
 $\rho(C1) = 0.00$   
 $\rho(O) = 0.15$

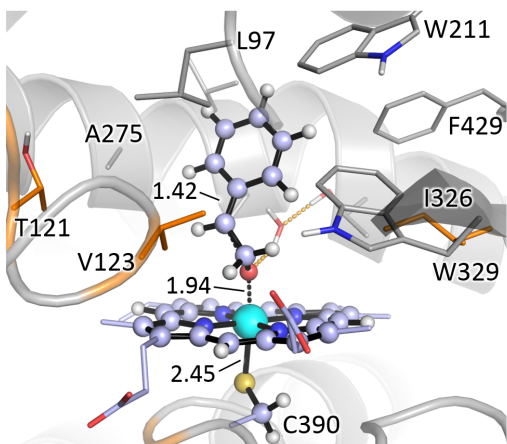

View 1

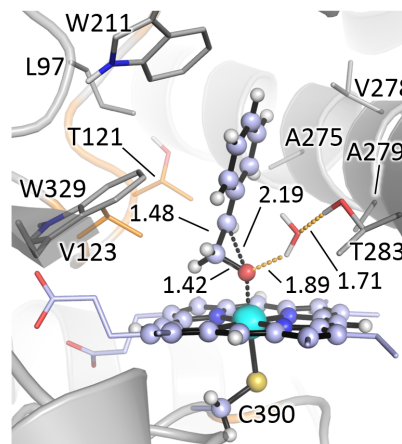

View 2

**LA1-TS2<sup>q</sup>**  
 $\Delta G^\ddagger = 2.0$  ( $\Delta E^\ddagger = 1.9$ )

$\angle O-C1-C2-C(Ph) = -104.6^\circ$

$q(Ph) = 0.02$   
 $q(C2) = 0.00$   
 $q(C1) = -0.04$   
 $q(O) = -0.49$   
 $\rho(Ph) = 0.21$   
 $\rho(C2) = 0.49$   
 $\rho(C1) = 0.00$   
 $\rho(O) = -0.05$

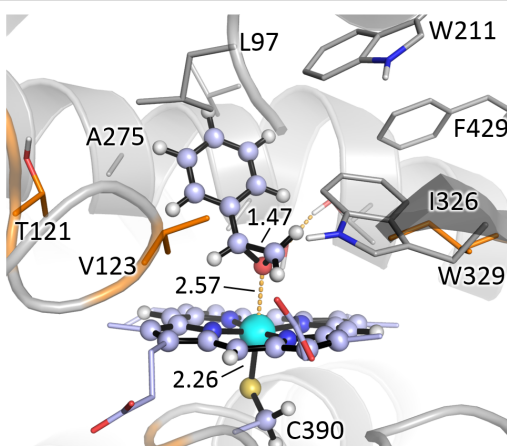

View 1

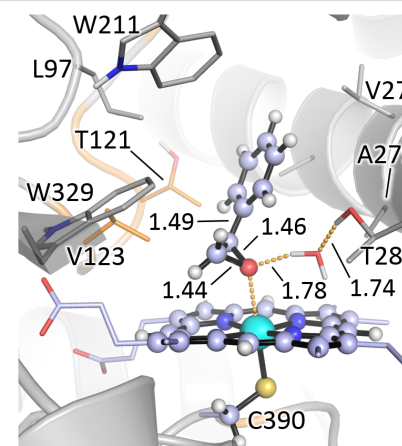

View 2

**LA1-2-R<sup>d</sup>**  
 $\Delta G_r = -20.0$  ( $\Delta E_r = -21.0$ )

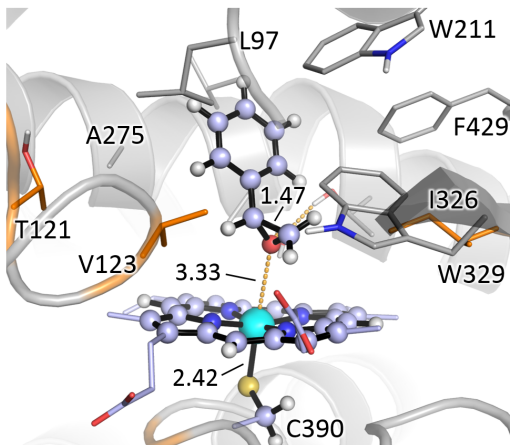

View 1

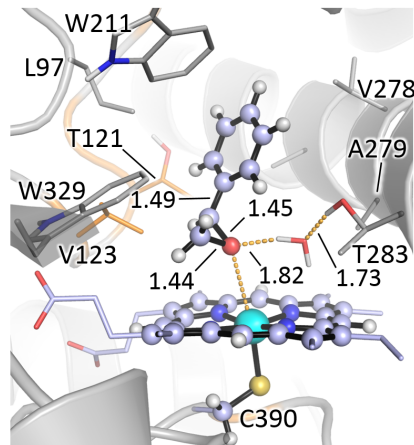

View 2

LA1-2-R<sup>q</sup> $\Delta G_r = -26.3$  ( $\Delta E_r = -26.2$ )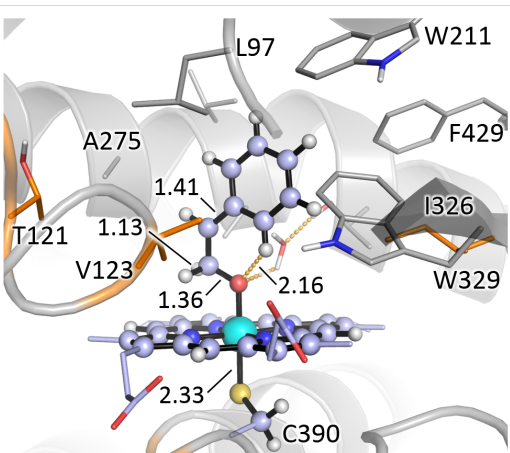

View 1

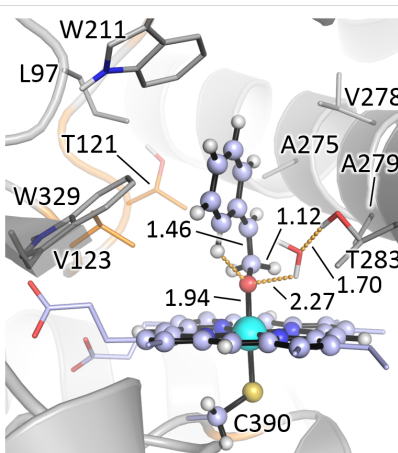

View 2

LA1-Int2<sup>d</sup> $\Delta \Delta G = -3.4$  ( $\Delta \Delta E = -4.3$ ) $\angle O-C1-C2-C(Ph) = -11.0^\circ$  $\angle H-C1-C2-C(Ph) = 114.6^\circ$ 

$q(Ph) = 0.20$   
 $q(C2) = 0.00$   
 $q(C1) = 0.04$   
 $q(O) = -0.55$

$\rho(Ph) = 0.09$   
 $\rho(C2) = 0.21$   
 $\rho(C1) = -0.01$   
 $\rho(O) = -0.02$

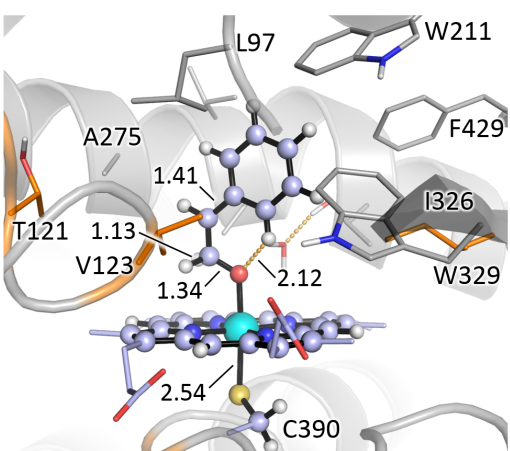

View 1

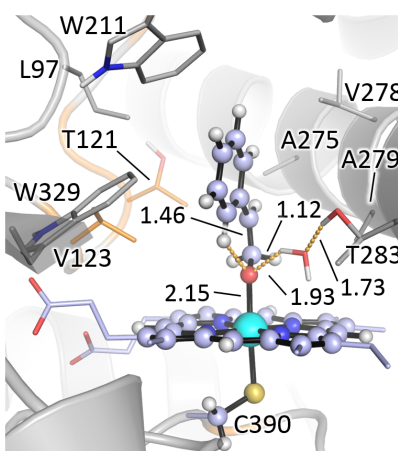

View 2

LA1-Int-2<sup>q</sup> $\Delta \Delta G = -2.2$  ( $\Delta \Delta E = -0.5$ ) $\angle O-C1-C2-C(Ph) = -7.5^\circ$  $\angle H-C1-C2-C(Ph) = 120.0^\circ$ 

$q(Ph) = 0.33$   
 $q(C2) = -0.03$   
 $q(C1) = 0.06$   
 $q(O) = -0.65$

$\rho(Ph) = -0.01$   
 $\rho(C2) = -0.01$   
 $\rho(C1) = 0.01$   
 $\rho(O) = 0.08$

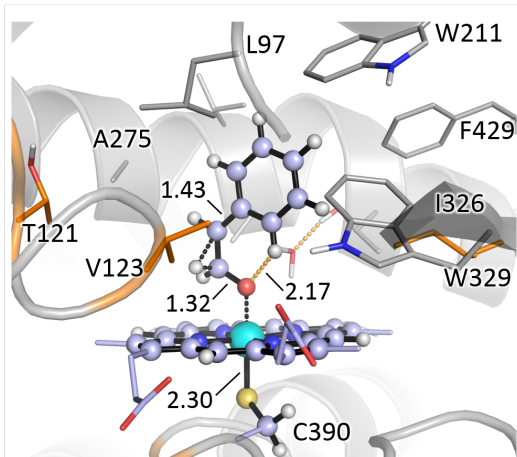

View 1

**LA1-TS3-cis-si<sup>d</sup>**  
 $\Delta G^\ddagger = -1.6$  ( $\Delta E^\ddagger = 0.4$ )

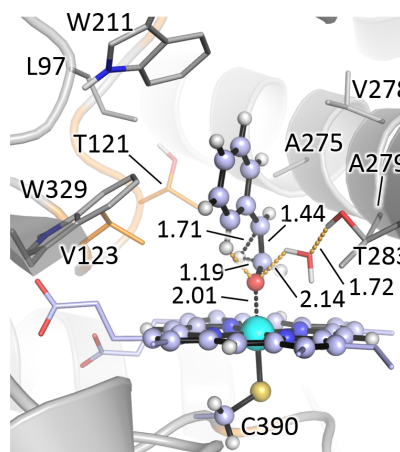

View 2

$q(\text{Ph}) = 0.31$   
 $q(\text{C}2) = -0.08$   
 $q(\text{C}1) = 0.06$   
 $q(\text{O}) = -0.54$   
 $\rho(\text{Ph}) = 0.00$   
 $\rho(\text{C}2) = 0.01$   
 $\rho(\text{C}1) = 0.00$   
 $\rho(\text{O}) = -0.01$

$\angle\text{H-C1-C2-C(Ph)} = 102.5^\circ$

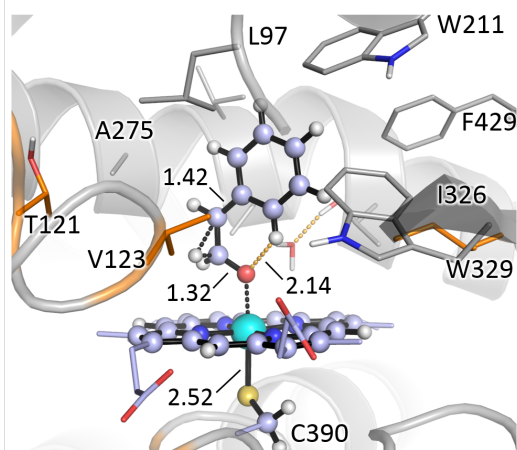

View 1

**LA1-TS3-cis-si<sup>a</sup>**  
 $\Delta G^\ddagger = -0.1$  ( $\Delta E^\ddagger = 0.1$ )

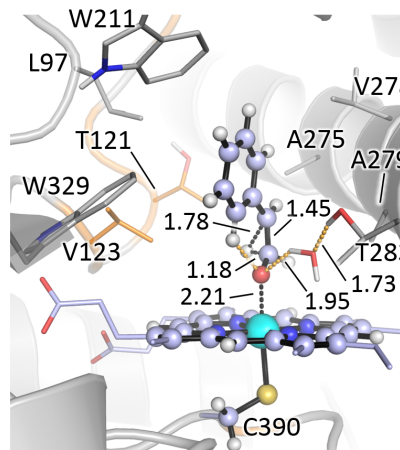

View 2

$q(\text{Ph}) = 0.32$   
 $q(\text{C}2) = -0.07$   
 $q(\text{C}1) = 0.06$   
 $q(\text{O}) = -0.63$   
 $\rho(\text{Ph}) = 0.00$   
 $\rho(\text{C}2) = 0.01$   
 $\rho(\text{C}1) = 0.00$   
 $\rho(\text{O}) = 0.05$

$\angle\text{H-C1-C2-C(Ph)} = 104.9^\circ$

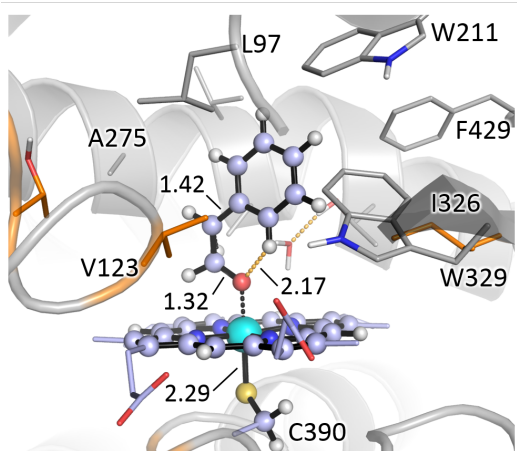

View 1

**LA1-TS3-trans-re<sup>d</sup>**  
 $\Delta G^\ddagger = -1.7$  ( $\Delta E^\ddagger = 0.6$ )

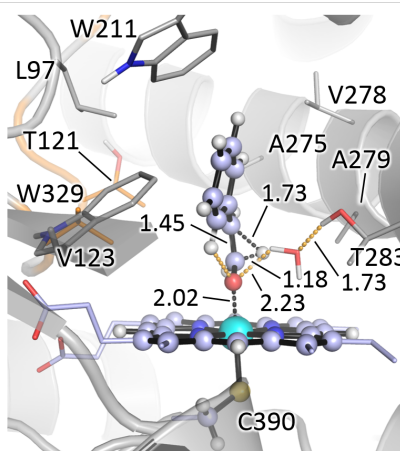

View 2

$q(\text{Ph}) = 0.27$   
 $q(\text{C}2) = -0.01$   
 $q(\text{C}1) = 0.00$   
 $q(\text{O}) = -0.52$   
 $\rho(\text{Ph}) = 0.00$   
 $\rho(\text{C}2) = 0.01$   
 $\rho(\text{C}1) = 0.00$   
 $\rho(\text{O}) = 0.00$

$\angle\text{H-C1-C2-C(Ph)} = -104.4^\circ$



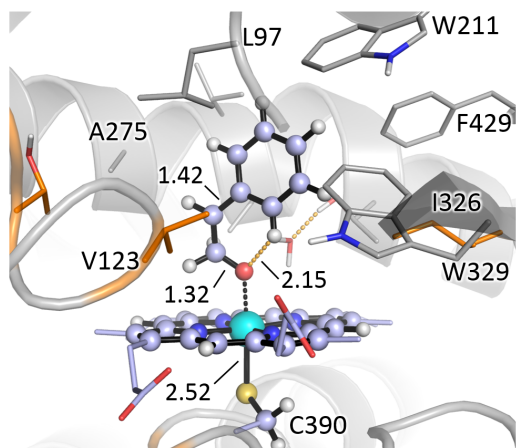

View 1

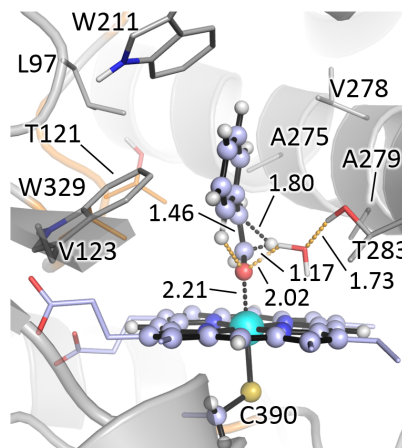

View 2

$$q(\text{Ph}) = 0.29$$

$$q(\text{C}2) = -0.03$$

$$q(\text{C}1) = 0.04$$

$$q(\text{O}) = -0.61$$

$$\rho(\text{Ph}) = 0.00$$

$$\rho(\text{C}2) = 0.00$$

$$\rho(\text{C}1) = 0.01$$

$$\rho(\text{O}) = 0.05$$

**LA1-TS3-trans-re<sup>q</sup>**  
 $\Delta G^\ddagger = 0.4$  ( $\Delta E^\ddagger = 0.5$ )

$$\angle \text{H-C1-C2-C(Ph)} = -108.9^\circ$$

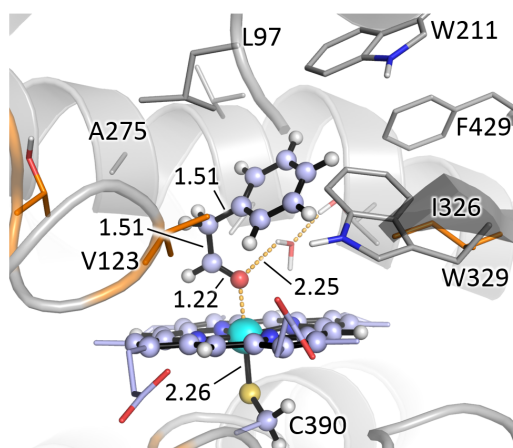

View 1

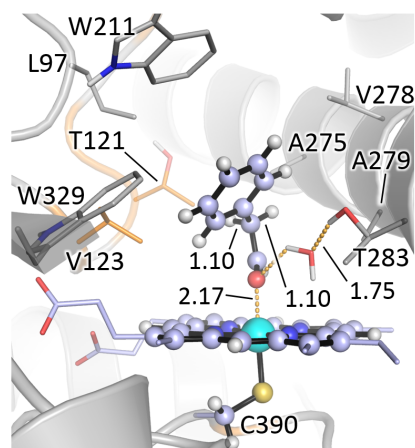

View 2

**LA1-3<sup>d</sup>**  
 $\Delta G_r = -46.8$  ( $\Delta E_r = -46.1$ )

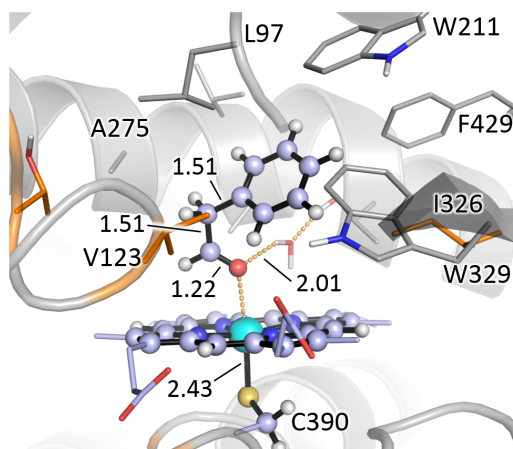

View 1

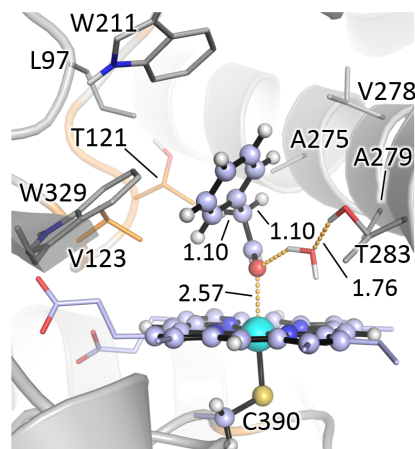

View 2

**LA1-3<sup>q</sup>**  
 $\Delta G_r = -49.3$  ( $\Delta E_r = -50.2$ )

The particular substrate bound conformation in a catalytically relevant pose explored here, exposing the *si* face to the iron-oxo species, corresponds to the major NAC binding pose characterized from MD simulations (see **Figure S10**). This particular binding mode leads to the preferential formation of the *R*-epoxide product.

For the reaction occurring in P450<sub>LA1</sub> active site, the covalent radical intermediate LA1-**Int1** formed from a *si* face NAC in the quartet and doublet electronic states can be optimized as a minimum on the potential energy surface (PES). This is indicating that the enzyme active site can stabilize these reactive intermediates due to confinement, as compared to the free-enzyme model system (see **Figure S1**).

The calculated rate-limiting TS1 is 3.3 kcal·mol<sup>-1</sup> lower than the equivalent TS1 with the substrate oriented with the less explored binding mode exposing the *re* enantioface to the iron-oxo species, as described in the previous **Figure S14**.

Epoxidation pathway and carbonyl formation pathway are both energetically accessible and both pathways can compete, similar to enzyme-free system (see **Figure S1**). Epoxidation is slightly favored in the doublet state, being barrierless from LA1-**Int1**<sup>d</sup> (LA1-**TS2**<sup>d</sup> could not be optimized) although carbocation LA1-**Int2**<sup>d</sup> leading to the carbonyl pathway can also be formed after a required conformational change that involves the rotation of the methylene-oxygen group (see **Figure S18**). Carbonyl formation is slightly favored in the quartet state after the required conformational change of LA1-**Int1**<sup>q</sup> to stabilize LA1-**Int2**<sup>q</sup> due to stereoelectronic effects (see **Figure S15-B** and **Figure S16**).

QM/MM calculations for the aldehyde formation pathway describe that the carbocation intermediate (LA1-**Int2**) is slightly more stabilized than the radical intermediate (LA1-**Int1**) for both electronic states, and that 1,2-hydride migration from LA1-**Int2** is barrierless.

**Figure S16:** QM/MM optimized structures of key intermediates formed in P450<sub>LA1</sub> WT active site: **A)** covalent radical intermediate (LA1-Int1<sup>q</sup>); and **B)** covalent carbocation intermediate (LA1-Int2<sup>q</sup>). Lowest in energy electronic states are considered (see **Figure S15**).

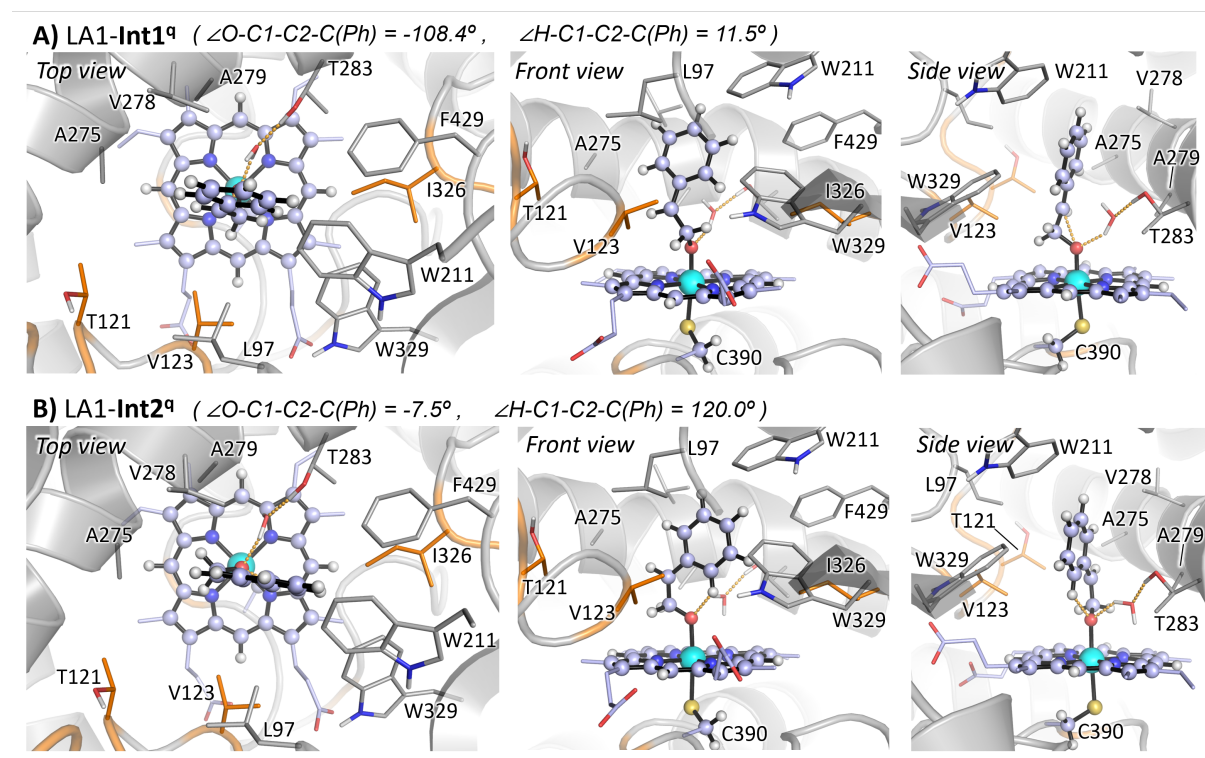

**Figure S17:** Active site packing occurring in P450<sub>LA1</sub> QM/MM optimized key transition states: **A) LA1-TS2** and **B) LA1-TS3**. Only lowest in energy electronic states are considered here (see **Figure S15**). For each QM/MM optimized structure two different orientations (side and top view) are shown, using two different representation models with and without space-filling model for key active site residues (L97, W211, V278, A279, W329, and F429).

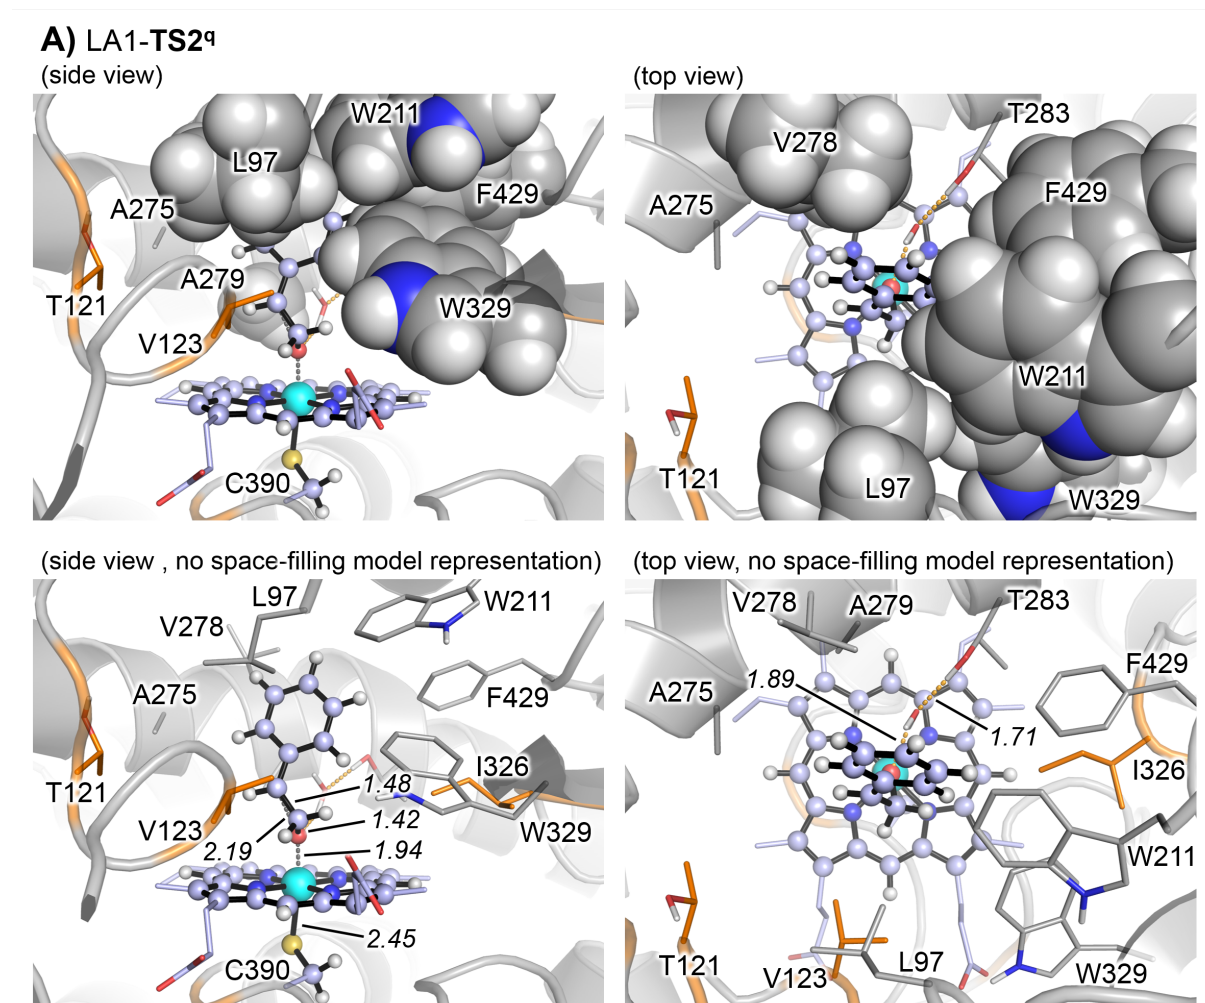

**B) LA1-TS3<sup>d</sup>**

(side view)

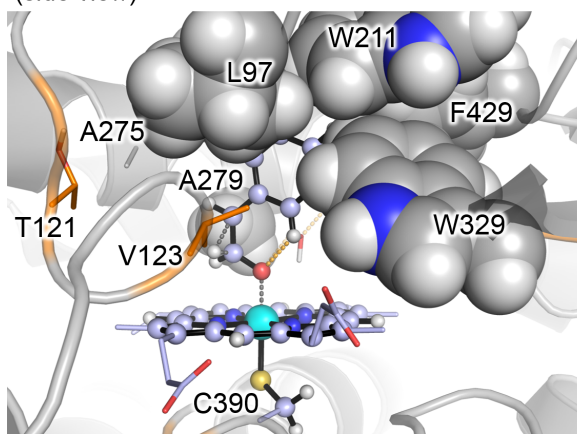

(top view)

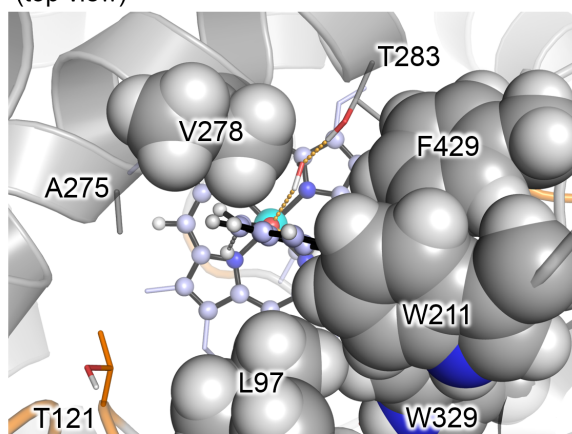

(side view, no space-filling model representation)

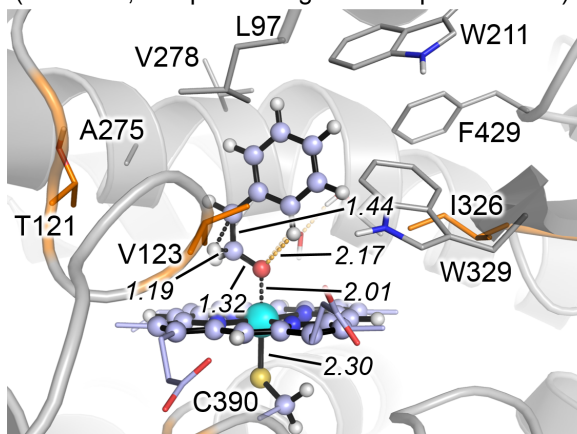

(top view, no space-filling model representation)

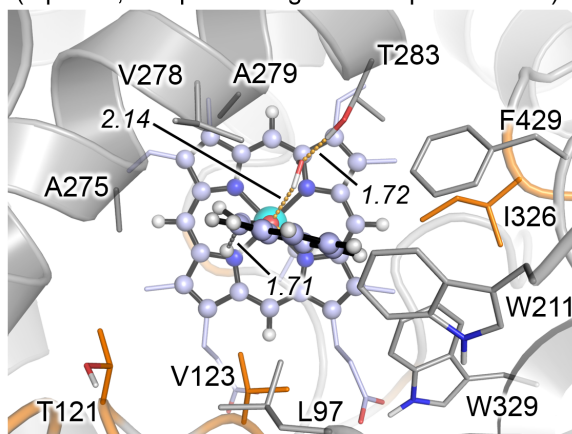

Active site packing in P450<sub>LA1</sub> impose steric restrictions that directly impact on the transition state structures. Active site residues V278, F429, W211, and W329 force LA1-TS2<sup>a</sup> structure to slightly modify its  $\angle(\text{Fe-O-C1-C2})$  dihedral angle as compared to the free-enzyme model TS2 (147.5° vs 179.1°, respectively). However, these interactions do not have a large influence on the energy barrier (LA1-TS2<sup>a</sup>,  $\Delta G^\ddagger=2.0 \text{ kcal}\cdot\text{mol}^{-1}$ ) and do not prevent the formation of the *R*-epoxide product since the energy barrier is still very low. In LA1-TS3, the phenyl ring of styrene is also stacked between V278, W329, W211, and F429 residues.

**Figure S18:** QM/MM calculations were used to study the rotation of the C1–C2 bond in the quartet covalent radical intermediate formed in the P450<sub>LA1</sub> WT system (LA1-Int1<sup>q</sup>, **Figure S15**).

**A)** QM/MM relaxed scan calculations were carried out along the rotation of  $\angle(\text{O-C1-C2-C}(\text{Ph}))$  dihedral angle starting from the optimized radical intermediate species (LA1-Int1<sup>q</sup>,  $\angle(\text{O-C1-C2-C}(\text{Ph}))$  ca.  $-108^\circ$ ). Calculations were carried out using the mechanical embedding (ME) approach and at the (U)B3LYP/6-31G(d)+SDD(Fe):Amber FF14SB level.

**B)** Single point calculations were performed on the optimized points along the relaxed scan coordinate reported in **A**), but using an electrostatic embedding (EE) scheme and at (U)B3LYP/Def2TZVP:Amber FF14SB level.

**C)** Geometries of key points on the scan coordinate reported in **A**).

Energies are referred considering the optimized LA1-Int1<sup>q</sup> as zero. Energies and dihedrals are given in kcal·mol<sup>-1</sup> and degrees (°), respectively.

**A)**

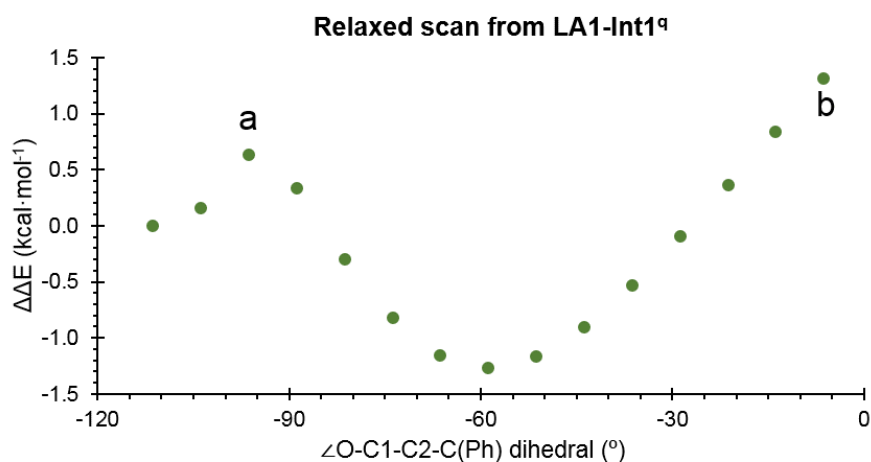

**B)**

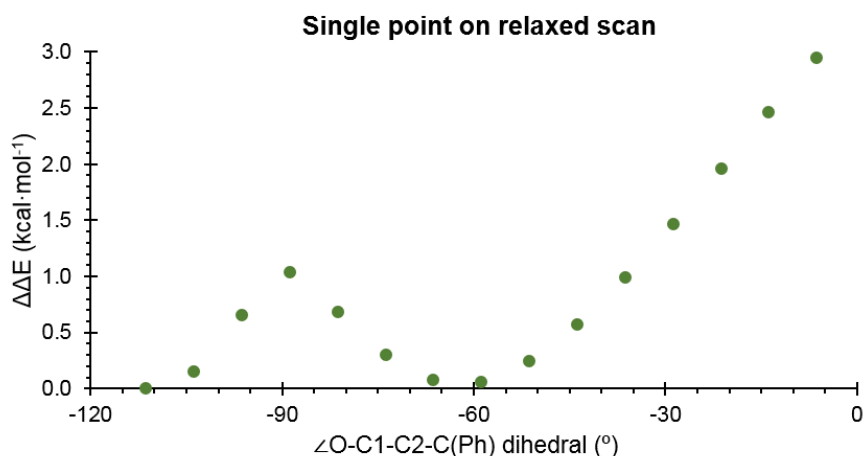

**c)**

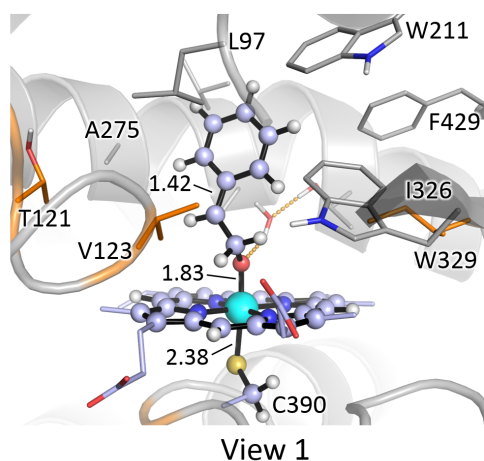

**LA1-Int1<sup>a</sup>**

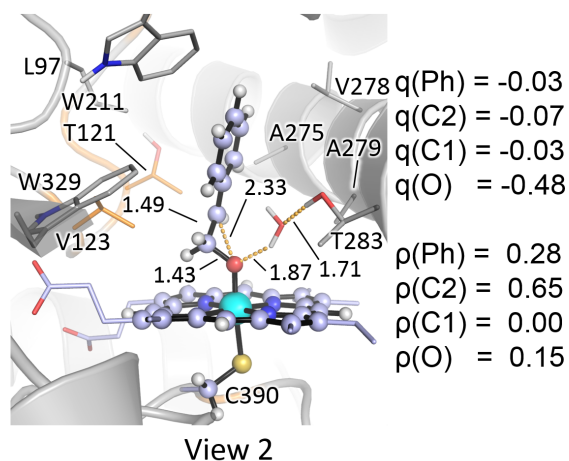

$$\angle O-C1-C2-C(Ph) = -108.4^\circ$$

$q(Ph) = -0.03$   
 $q(C2) = -0.07$   
 $q(C1) = -0.03$   
 $q(O) = -0.48$   
 $\rho(Ph) = 0.28$   
 $\rho(C2) = 0.65$   
 $\rho(C1) = 0.00$   
 $\rho(O) = 0.15$

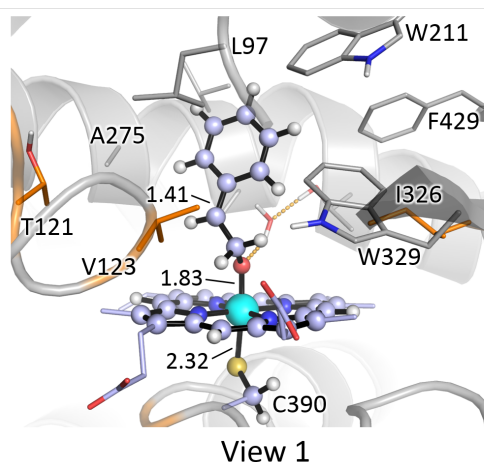

**LA1-scan-a<sup>d</sup> structure**

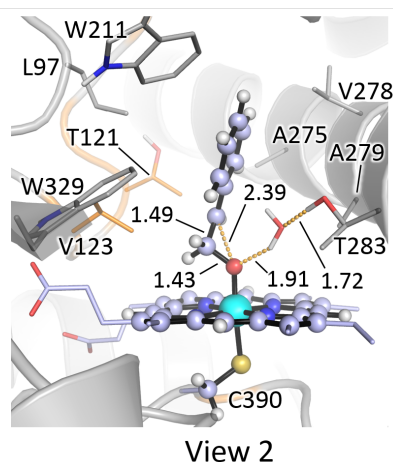

$$\angle O-C1-C2-C(Ph) = -96.4^\circ$$

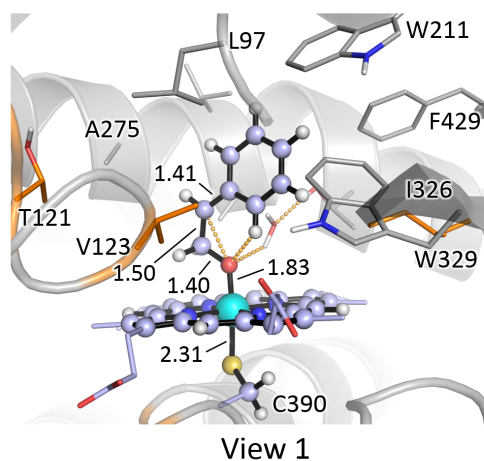

**LA1-scan-b<sup>a</sup> structure**

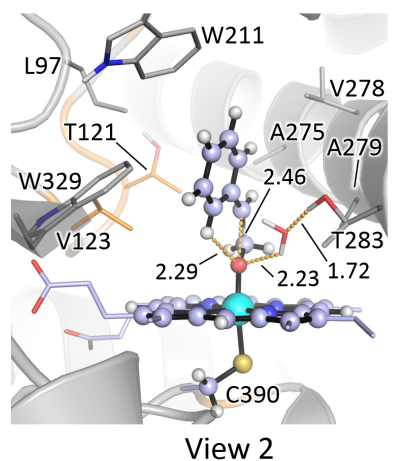

$$\angle O-C1-C2-C(Ph) = -6.4^\circ$$

QM/MM relaxed scan calculations indicated that rotation along the O-C1-C2-C(Ph) dihedral from **LA1-Int1** to **LA1-Int2**-like geometry requires a low energy  $\Delta E = \text{ca. } +1.5 \text{ kcal}\cdot\text{mol}^{-1}$  ( $\Delta E = \text{ca. } 3.0 \text{ kcal}\cdot\text{mol}^{-1}$  from Single Point calculations at higher level) on the lower in energy quartet

electronic state. This electronic energy value is similar to the electronic energy barrier calculated for the formation of the epoxide product (LA1-TS2<sup>q</sup>  $\Delta E^\ddagger = +1.9 \text{ kcal}\cdot\text{mol}^{-1}$ , from Single Point calculations at higher level, see **Figure S15**).

All attempts to optimize a rotational transition state starting from the highest in energy point on the relaxed scan coordinate were unsuccessful, suggesting that this conformational change can occur slightly uphill but in a barrierless manner, , and thus LA1-Int2-like geometry can be easily accessed from LA1-Int1<sup>q</sup>. This is similar to what is found for the enzyme-free model (see **Figure S2**).



**Figure S19:** QM/MM exploration of aMOx variant catalyzed oxidation of styrene (**1**) substrate. QM/MM calculations were carried out starting from a MD-relaxed structure of the covalent intermediate (**Int1**) formed in aMOx active site (**Figure S13-B**), that mimics the major explored (preferred), catalytically relevant, binding pose of styrene substrate characterized from restrained-MD simulations (red and pink marker selected snapshots in **Figure S11**). This corresponds to a styrene binding pose with its *re* face exposed to the iron-oxo species (pro-*S* epoxidation).

**A)** QM/MM computed relative stabilities in terms of electronic energy at the QM region ( $\Delta E_{\text{QM}}$ ), QM/MM ONIOM electronic energy ( $\Delta E$ ), enthalpy ( $\Delta H$ ), and Gibbs energy ( $\Delta G$ ) for the different optimized species. Energy values were obtained at the (U)B3LYP/Def2TZVP:AmberFF14SB//(U)B3LYP/6-31G(d)+SDD(Fe):AmberFF14SB level, with the same MM parameters used in MD simulations. An Electrostatic Embedding was used (see computational details). Doublet (d) and quartet (q) electronic states were considered, and all energies are referred considering the lowest in energy aMOx-**1<sup>d</sup>** structure as zero.

**B)** QM/MM calculated Gibbs free energy profile. Relative Gibbs free energies ( $\Delta G$ ) and electronic energies ( $\Delta E$ , in parenthesis) are reported.

**C)** QM/MM optimized structures. Atoms included in the QM region are shown in ball-and-stick representation, and residues in the MM region are shown in sticks. Mutated residues are highlighted in orange. Mulliken charges ( $q$ ) and spin density ( $\rho$ ) values for the phenyl group (Ph, sum of all C and H atoms), C2 benzylic position, C1 and O, are reported.

**D)** Intrinsic Reaction Coordinate calculations (IRC) starting from aMOx-**TS1<sup>d</sup>** and aMOx-**TS1<sup>q</sup>**.

**E)** Reverse Intrinsic Reaction Coordinate calculation (IRC) starting from aMOx-**TS3-trans-si<sup>q</sup>**

Energies, distances, and Mulliken charges and spin density values are given in kcal·mol<sup>-1</sup>, Angstrom (Å), and a.u., respectively.

A)

| Structure         | Electronic State | $\Delta E_{\text{QM}}$ | $\Delta E$ | $\Delta H$ | $\Delta G$ |
|-------------------|------------------|------------------------|------------|------------|------------|
| aMOx-1            | doublet (d)      | 0.0                    | 0.0        | 0.0        | 0.0        |
|                   | quartet (q)      | 0.2                    | 0.1        | 0.1        | 0.0        |
| aMOx-TS1          | doublet (d)      | 13.1                   | 7.2        | 6.4        | 9.2        |
|                   | quartet (q)      | 15.6                   | 8.0        | 7.2        | 10.0       |
| aMOx-Int1         | doublet (d)      | -9.5                   | -15.7      | -16.3      | -14.1      |
|                   | quartet (q)      | -8.9                   | -19.4      | -19.6      | -18.1      |
| aMOx-TS2 pro-S    | doublet (d)      | -4.7                   | -12.3      | -12.0      | -8.4       |
|                   | quartet (q)      | -5.1                   | -10.1      | -10.2      | -7.4       |
| aMOx-TS2 pro-R    | doublet (d)      | -5.2                   | -5.8       | -4.9       | 0.8        |
|                   | quartet (q)      | -11.9                  | 1.3        | 1.9        | 6.6        |
| aMOx-2-S          | doublet (d)      | -31.6                  | -35.7      | -34.0      | -31.9      |
|                   | quartet (q)      | -38.9                  | -38.0      | -36.1      | -35.2      |
| aMOx-2-R          | doublet (d)      | -24.5                  | -28.5      | -25.9      | -22.5      |
|                   | quartet (q)      | -35.1                  | -37.9      | -36.4      | -34.7      |
| aMOx-Int2         | doublet (d)      | -18.9                  | -14.0      | -14.9      | -12.2      |
|                   | quartet (q)      | -16.8                  | -8.7       | -10.0      | -9.0       |
| aMOx-TS3-cis-re   | doublet (d)      | -18.5                  | -14.2      | -15.9      | -12.4      |
|                   | quartet (q)      | -17.7                  | -10.4      | -12.6      | -10.4      |
| aMOx-TS3-trans-si | doublet (d)      | -17.2                  | -11.9      | -13.4      | -10.0      |
|                   | quartet (q)      | -16.4                  | -8.1       | -10.0      | -8.1       |
| aMOx-3            | doublet (d)      | -57.9                  | -56.0      | -55.1      | -53.7      |
|                   | quartet (q)      | -61.4                  | -59.6      | -58.7      | -58.9      |

<sup>a</sup> aMOx-Int2<sup>a</sup> was optimized with C2-*cis*-H, C2-*trans*-H, and *cis*-H-*trans*-H distances frozen. Distance values are taken from optimized structure in the doublet state. Frequency calculation showed that the optimized structure has all frequencies positive.

<sup>b</sup> aMOx-TS3-cis-re<sup>a</sup> was optimized with C2-*cis*-H, C1-*cis*-H and O-C1 distances frozen. Distance values are taken from optimized structure in the doublet state. Frequency calculation showed that all frequencies of the optimized structure are positive except one, which corresponds to the H-migration coordinate.

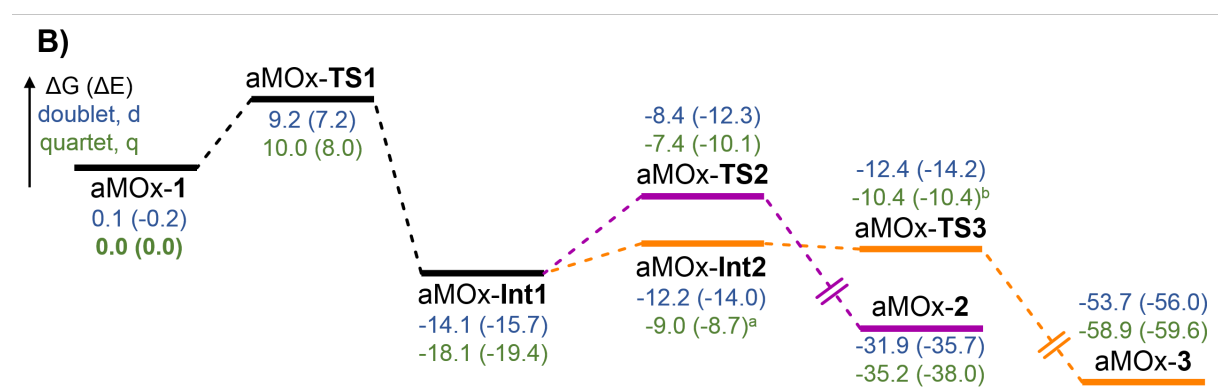

c)

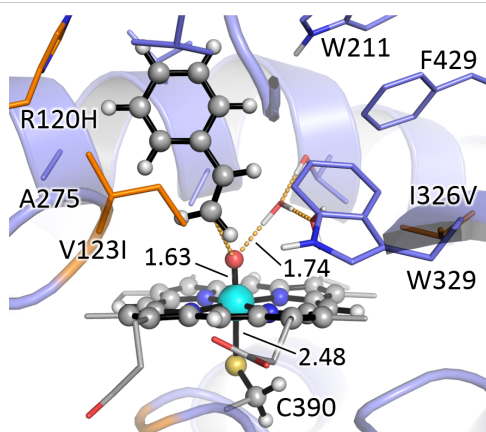

View 1

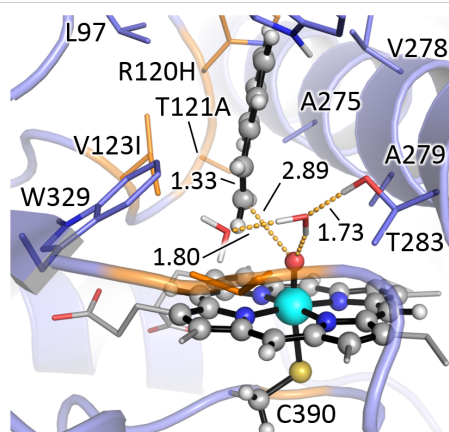

View 2

aMOx-1<sup>d</sup>  
 $\Delta G = 0.0$  ( $\Delta E = 0.0$ )

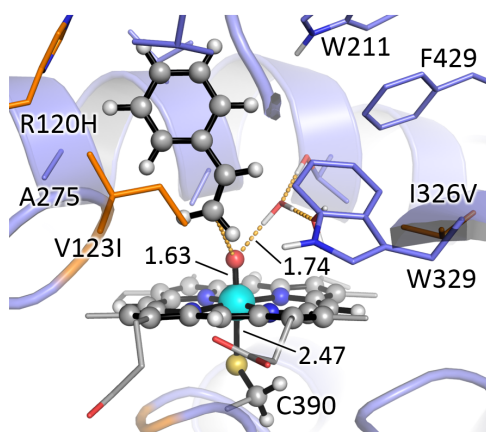

View 1

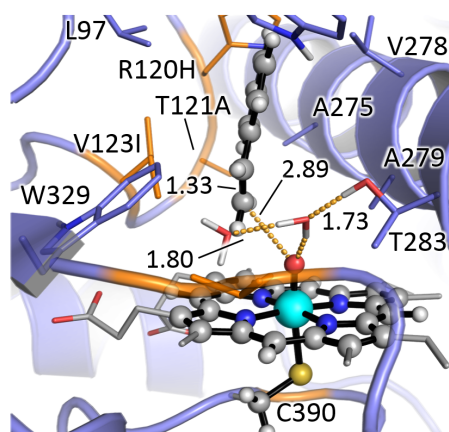

View 2

aMOx-1<sup>a</sup>  
 $\Delta G = 0.0$  ( $\Delta E = 0.1$ )

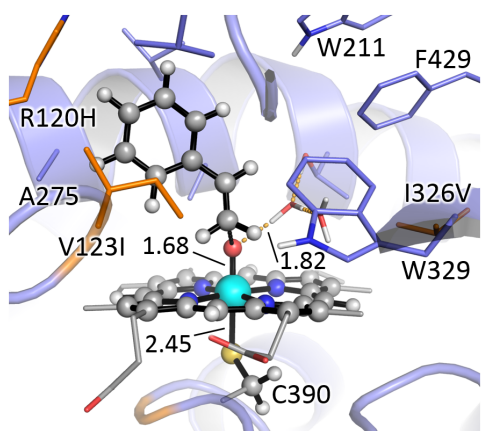

View 1

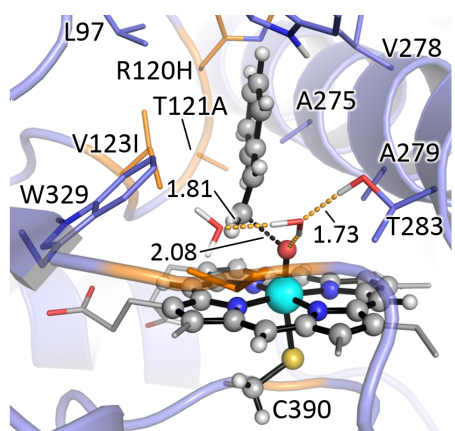

View 2

aMOx-TS1<sup>d</sup>  
 $\Delta G^\ddagger = 9.2$  ( $\Delta E^\ddagger = 7.2$ )

$|\angle \text{Fe-O-C1-C2}| = 175.2^\circ$

$q(\text{Ph}) = 0.14$   
 $q(\text{C2}) = -0.06$   
 $q(\text{C1}) = -0.25$   
 $q(\text{O}) = -0.52$   
  
 $\rho(\text{Ph}) = -0.13$   
 $\rho(\text{C2}) = -0.27$   
 $\rho(\text{C1}) = 0.00$   
 $\rho(\text{O}) = 0.25$

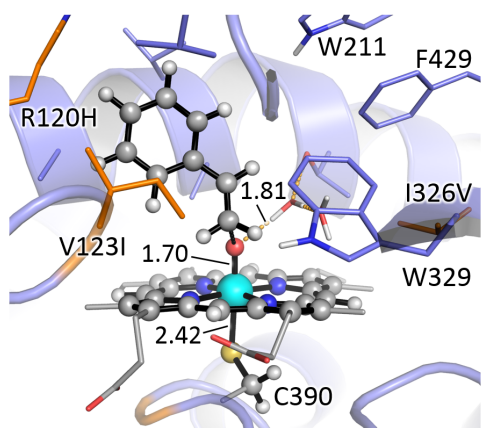

View 1

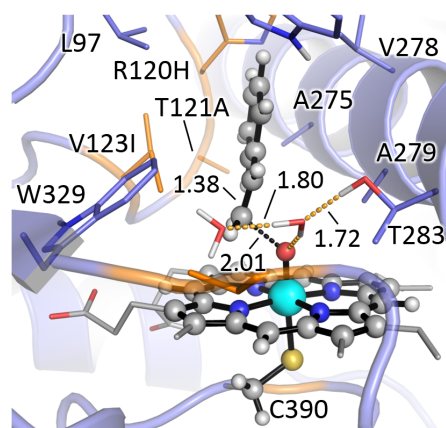

View 2

$$q(\text{Ph}) = 0.11$$

$$q(\text{C}2) = -0.08$$

$$q(\text{C}1) = -0.22$$

$$q(\text{O}) = -0.51$$

$$\rho(\text{Ph}) = 0.15$$

$$\rho(\text{C}2) = 0.35$$

$$\rho(\text{C}1) = -0.03$$

$$\rho(\text{O}) = 0.66$$

**aMOx-TS1<sup>q</sup>**  
 $\Delta G^\ddagger = 9.9$  ( $\Delta E^\ddagger = 7.9$ )

$$|\angle \text{Fe-O-C1-C2}| = 174.1^\circ$$

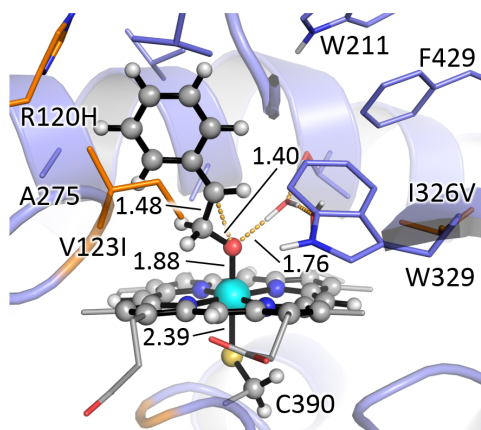

View 1

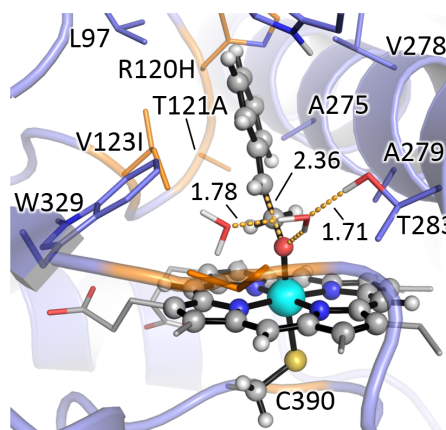

View 2

$$q(\text{Ph}) = 0.11$$

$$q(\text{C}2) = -0.09$$

$$q(\text{C}1) = 0.02$$

$$q(\text{O}) = -0.59$$

$$\rho(\text{Ph}) = -0.19$$

$$\rho(\text{C}2) = -0.47$$

$$\rho(\text{C}1) = 0.00$$

$$\rho(\text{O}) = 0.08$$

**aMOx-Int1<sup>d</sup>**  
 $\Delta G_r = -14.1$  ( $\Delta E_r = -15.7$ )  
 $\Delta \Delta G = 4.0$  ( $\Delta \Delta E = 3.7$ )

$$\angle \text{O-C1-C2-C(Ph)} = 166.1^\circ$$

$$\angle \text{H-C1-C2-C(Ph)} = 40.1^\circ$$

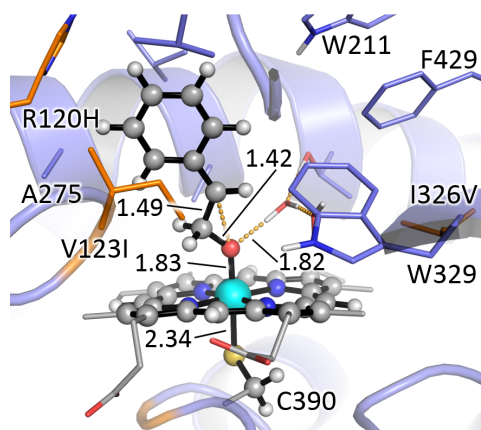

View 1

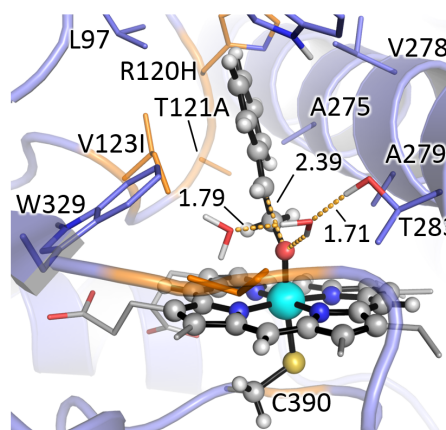

View 2

$$q(\text{Ph}) = -0.02$$

$$q(\text{C}2) = -0.16$$

$$q(\text{C}1) = 0.01$$

$$q(\text{O}) = -0.50$$

$$\rho(\text{Ph}) = 0.29$$

$$\rho(\text{C}2) = 0.69$$

$$\rho(\text{C}1) = 0.04$$

$$\rho(\text{O}) = 0.20$$

**aMOx-Int1<sup>q</sup>**  
 $\Delta G_r = -18.1$  ( $\Delta E_r = -19.5$ )  
 $\Delta \Delta G = 0.0$  ( $\Delta \Delta E = 0.0$ )

$$\angle \text{O-C1-C2-C(Ph)} = 165.7^\circ$$

$$\angle \text{H-C1-C2-C(Ph)} = 43.3^\circ$$

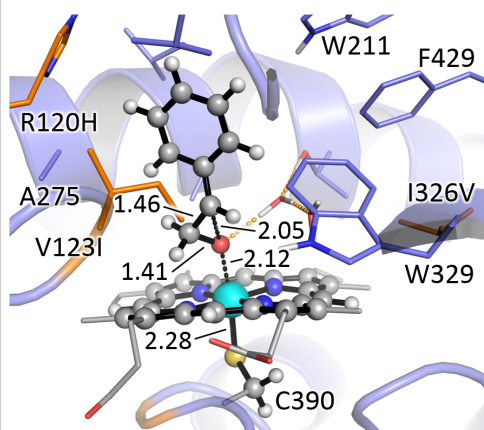

View 1

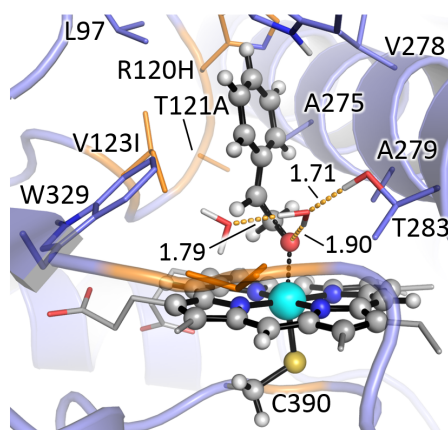

View 2

$$\begin{aligned} q(\text{Ph}) &= 0.26 \\ q(\text{C}2) &= -0.11 \\ q(\text{C}1) &= -0.01 \\ q(\text{O}) &= -0.53 \end{aligned}$$

$$\begin{aligned} \rho(\text{Ph}) &= 0.00 \\ \rho(\text{C}2) &= 0.00 \\ \rho(\text{C}1) &= 0.00 \\ \rho(\text{O}) &= 0.00 \end{aligned}$$

**aMOx-TS2 pro-S<sup>d</sup>**  
 $\Delta G^\ddagger = 5.7$  ( $\Delta E^\ddagger = 3.5$ )

$$\angle \text{O-C1-C2-C(Ph)} = 121.9^\circ$$

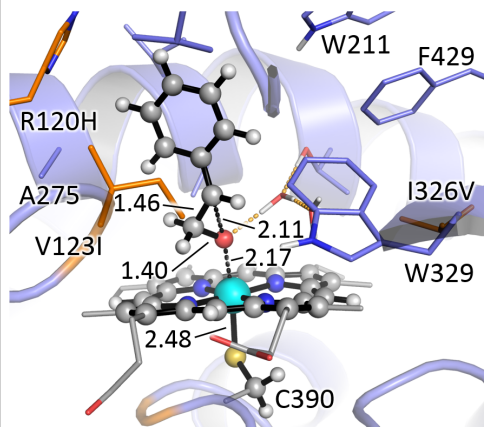

View 1

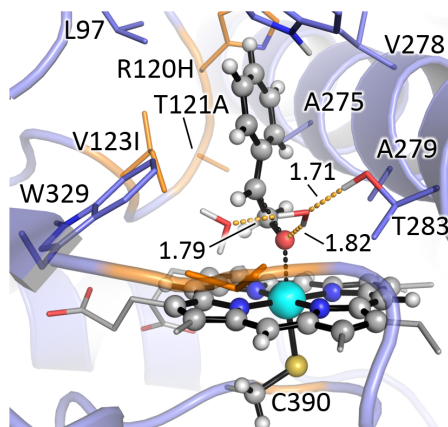

View 2

$$\begin{aligned} q(\text{Ph}) &= 0.22 \\ q(\text{C}2) &= -0.09 \\ q(\text{C}1) &= 0.00 \\ q(\text{O}) &= -0.57 \end{aligned}$$

$$\begin{aligned} \rho(\text{Ph}) &= 0.09 \\ \rho(\text{C}2) &= 0.25 \\ \rho(\text{C}1) &= 0.01 \\ \rho(\text{O}) &= -0.14 \end{aligned}$$

**aMOx-TS2 pro-S<sup>q</sup>**  
 $\Delta G^\ddagger = 10.7$  ( $\Delta E^\ddagger = 9.4$ )

$$\angle \text{O-C1-C2-C(Ph)} = 127.2^\circ$$

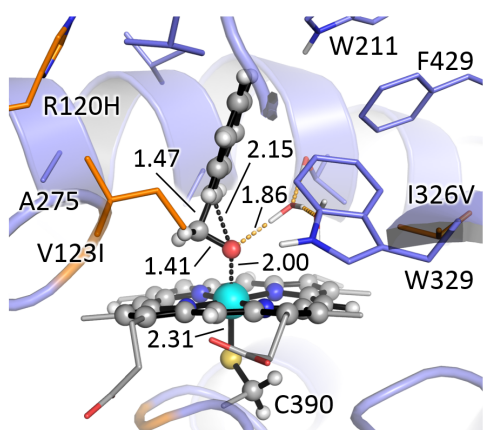

View 1

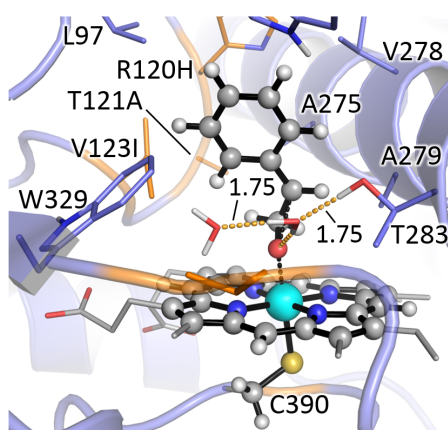

View 2

$$\begin{aligned} q(\text{Ph}) &= 0.22 \\ q(\text{C}2) &= -0.09 \\ q(\text{C}1) &= 0.05 \\ q(\text{O}) &= -0.53 \end{aligned}$$

$$\begin{aligned} \rho(\text{Ph}) &= -0.10 \\ \rho(\text{C}2) &= -0.24 \\ \rho(\text{C}1) &= 0.01 \\ \rho(\text{O}) &= 0.07 \end{aligned}$$

**aMOx-TS2 pro-R<sup>d</sup>**  
 $\Delta G^\ddagger = 14.9$  ( $\Delta E^\ddagger = 9.9$ )

$$\angle \text{O-C1-C2-C(Ph)} = -98.1^\circ$$

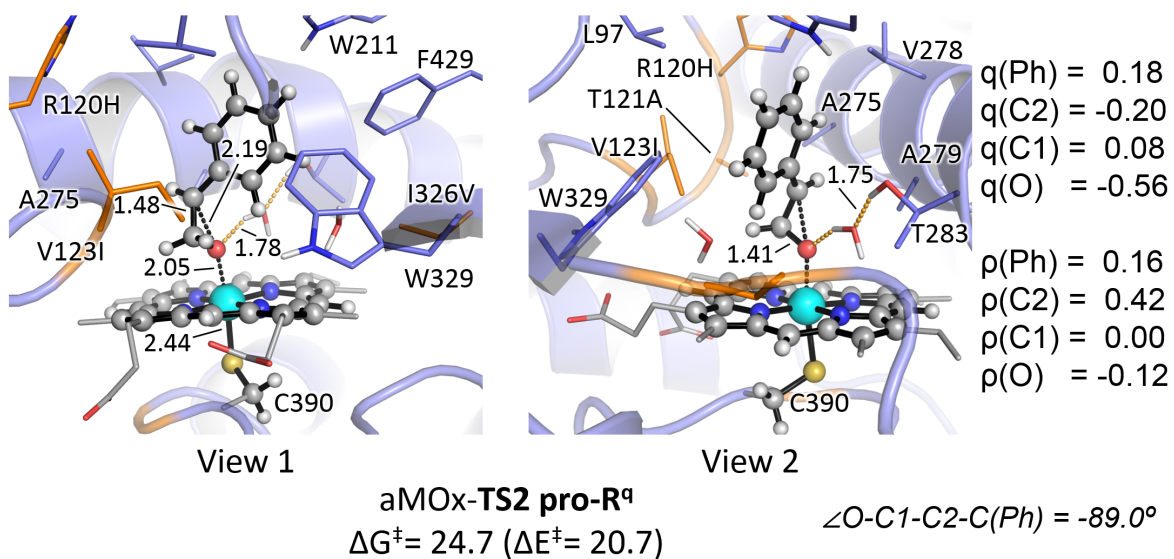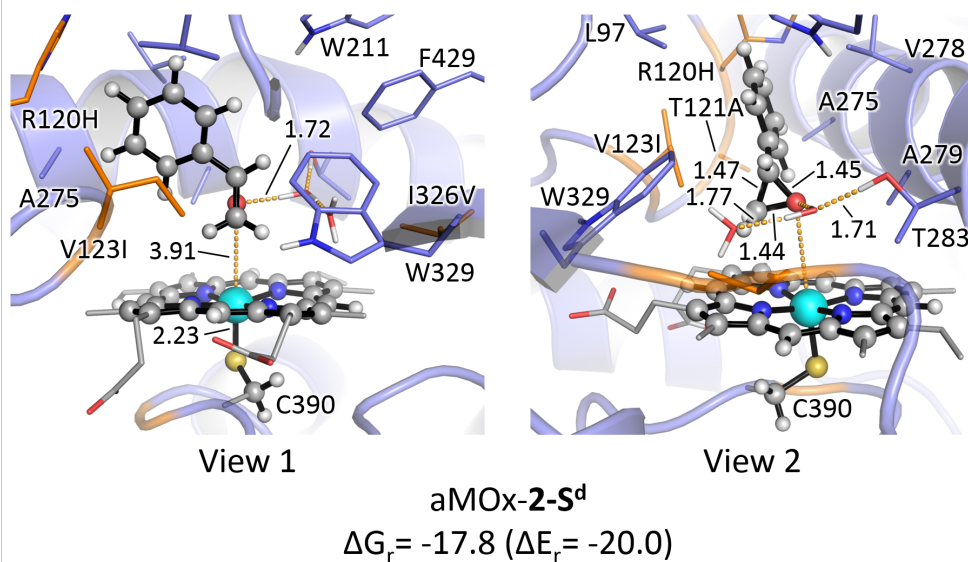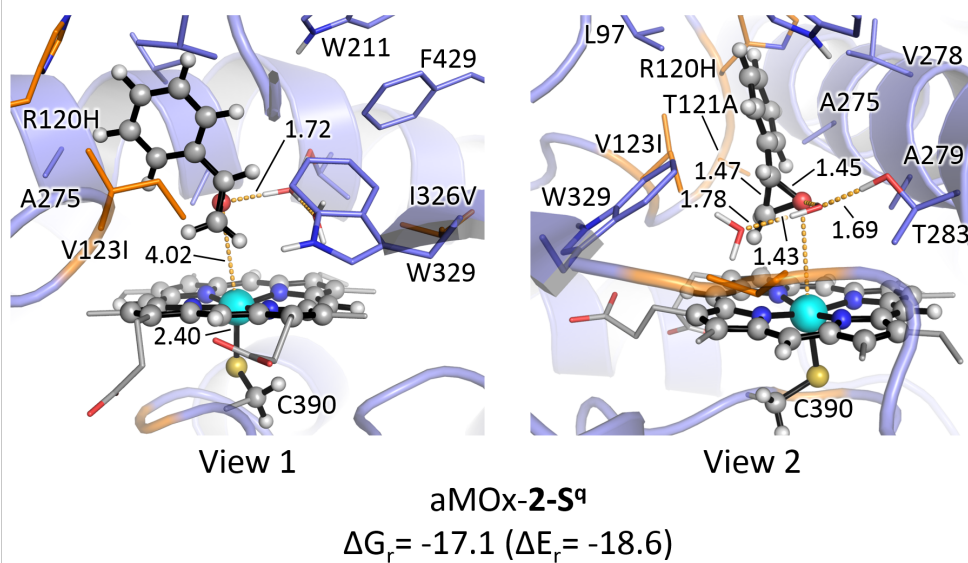

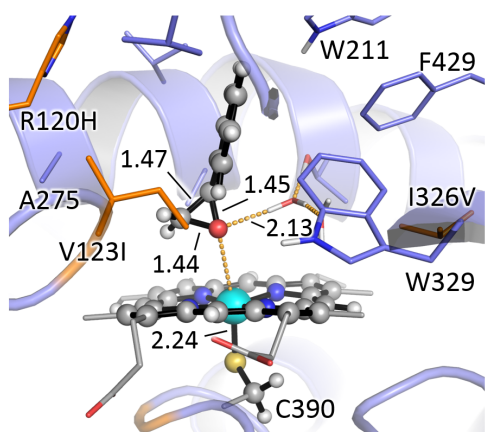

View 1

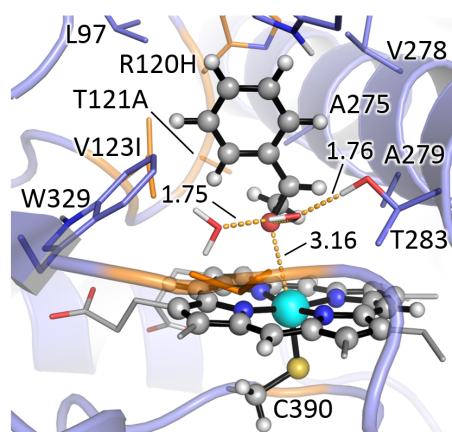

View 2

aMOx-2-R<sup>d</sup> $\Delta G_r = -8.4$  ( $\Delta E_r = -12.8$ )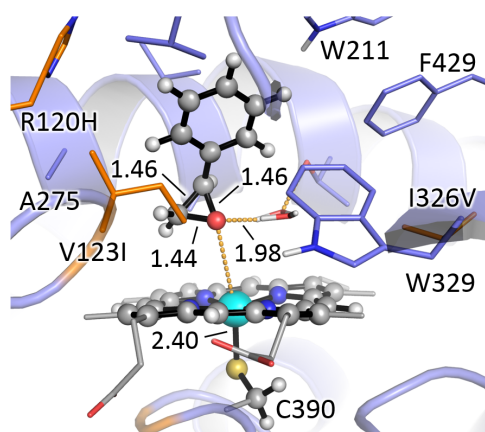

View 1

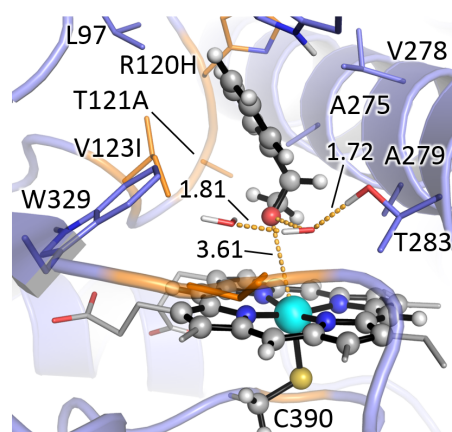

View 2

aMOx-2-R<sup>q</sup> $\Delta G_r = -16.6$  ( $\Delta E_r = -18.4$ )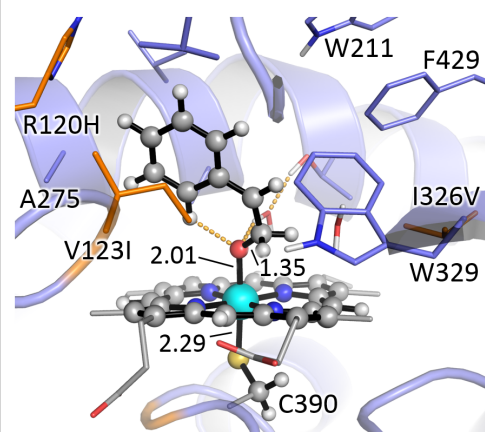

View 1

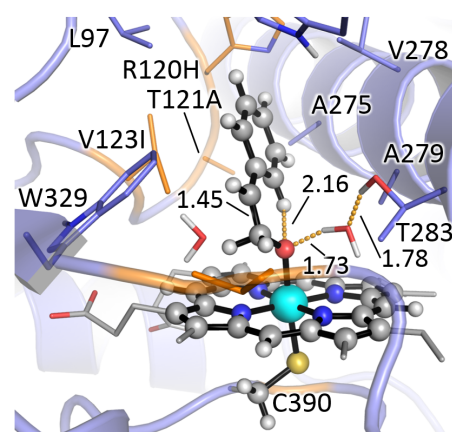

View 2

aMOx-Int2<sup>d</sup> $\Delta \Delta G = 1.9$  ( $\Delta \Delta E = 1.7$ )

q(Ph) = 0.33

q(C2) = -0.08

q(C1) = 0.08

q(O) = -0.63

 $\rho(\text{Ph}) = 0.00$  $\rho(\text{C2}) = -0.01$  $\rho(\text{C1}) = 0.01$  $\rho(\text{O}) = 0.01$  $\angle \text{O-C1-C2-C(Ph)} = 15.3^\circ$  $\angle \text{H-C1-C2-C(Ph)} = -107.8^\circ$

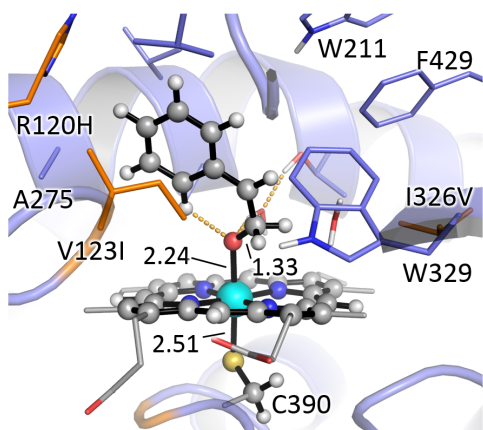

View 1

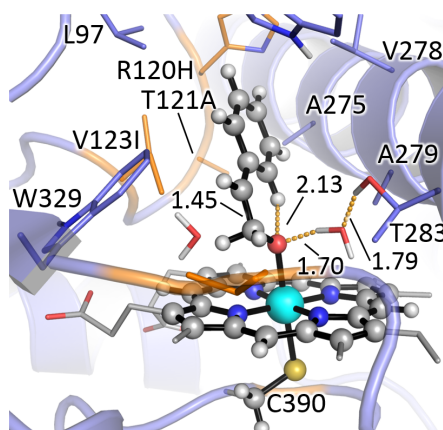

View 2

**aMOx-Int2<sup>a</sup>**  
 $\Delta\Delta G = 9.1$  ( $\Delta\Delta E = 10.8$ )

$q(\text{Ph}) = 0.32$   
 $q(\text{C}2) = -0.08$   
 $q(\text{C}1) = 0.09$   
 $q(\text{O}) = -0.69$   
 $\rho(\text{Ph}) = 0.00$   
 $\rho(\text{C}2) = 0.00$   
 $\rho(\text{C}1) = 0.01$   
 $\rho(\text{O}) = 0.06$   
 $\angle\text{O-C1-C2-C(Ph)} = 11.4^\circ$   
 $\angle\text{H-C1-C2-C(Ph)} = -113.0^\circ$

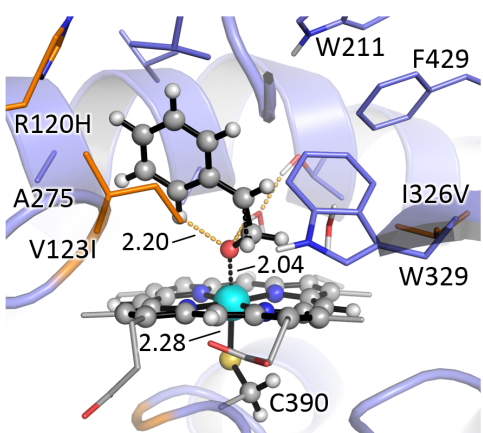

View 1

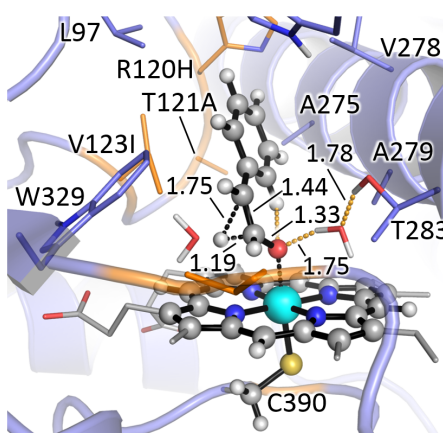

View 2

**aMOx-TS3-cis-re<sup>d</sup>**  
 $\Delta G^\ddagger = -0.2$  ( $\Delta E^\ddagger = -0.2$ )

$q(\text{Ph}) = 0.29$   
 $q(\text{C}2) = -0.06$   
 $q(\text{C}1) = 0.02$   
 $q(\text{O}) = -0.62$   
 $\rho(\text{Ph}) = 0.00$   
 $\rho(\text{C}2) = 0.00$   
 $\rho(\text{C}1) = 0.00$   
 $\rho(\text{O}) = 0.00$   
 $\angle\text{H-C1-C2-C(Ph)} = -99.8^\circ$

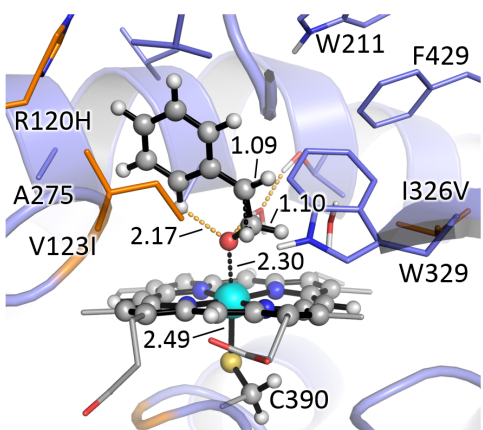

View 1

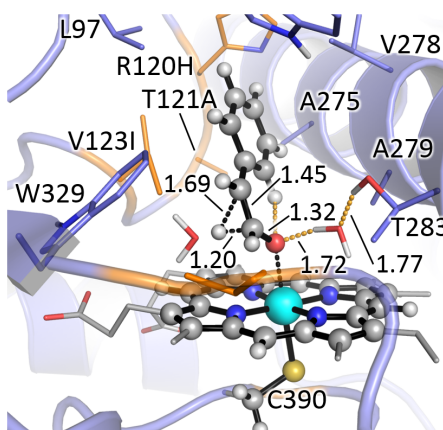

View 2

**aMOx-TS3-cis-re<sup>a</sup>**  
 $\Delta G^\ddagger = -1.5$  ( $\Delta E^\ddagger = -1.8$ )

$q(\text{Ph}) = 0.26$   
 $q(\text{C}2) = -0.08$   
 $q(\text{C}1) = 0.03$   
 $q(\text{O}) = -0.67$   
 $\rho(\text{Ph}) = 0.00$   
 $\rho(\text{C}2) = 0.00$   
 $\rho(\text{C}1) = 0.00$   
 $\rho(\text{O}) = 0.04$   
 $\angle\text{H-C1-C2-C(Ph)} = -99.7^\circ$



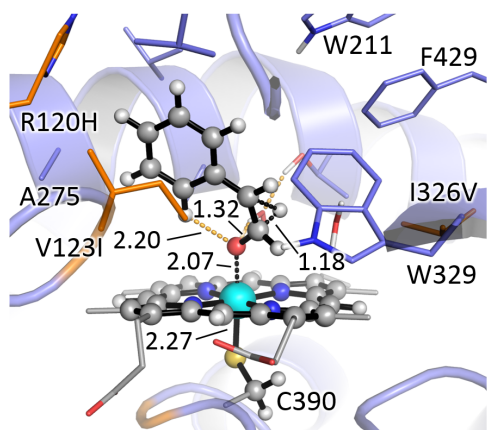

View 1

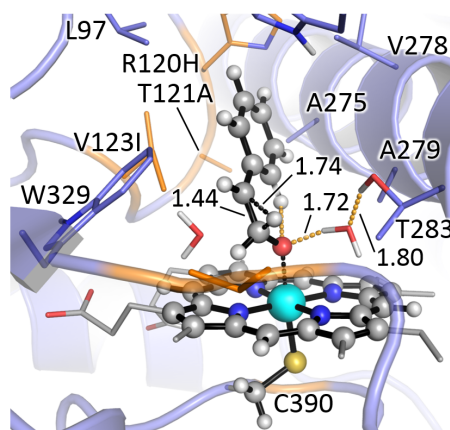

View 2

$$q(\text{Ph}) = 0.32$$

$$q(\text{C}2) = -0.17$$

$$q(\text{C}1) = 0.12$$

$$q(\text{O}) = -0.62$$

$$\rho(\text{Ph}) = 0.00$$

$$\rho(\text{C}2) = 0.00$$

$$\rho(\text{C}1) = 0.00$$

$$\rho(\text{O}) = 0.00$$

**aMOx-TS3-trans-si<sup>d</sup>**  
 $\Delta G^\ddagger = 2.1$  ( $\Delta E^\ddagger = 2.2$ )

$$\angle \text{H-C1-C2-C(Ph)} = 110.1^\circ$$

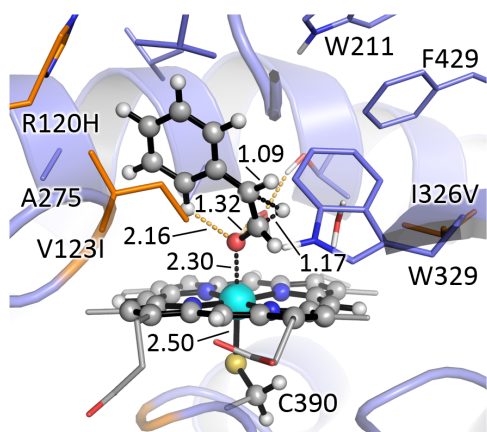

View 1

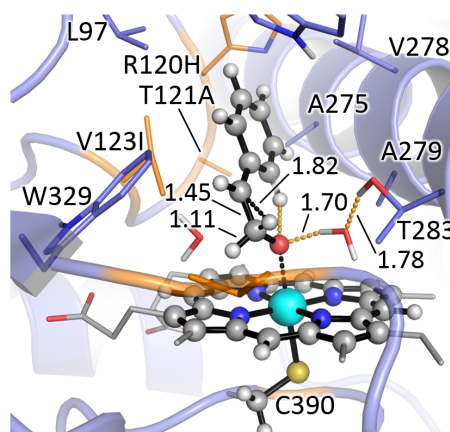

View 2

$$q(\text{Ph}) = 0.31$$

$$q(\text{C}2) = -0.17$$

$$q(\text{C}1) = 0.16$$

$$q(\text{O}) = -0.68$$

$$\rho(\text{Ph}) = 0.00$$

$$\rho(\text{C}2) = 0.00$$

$$\rho(\text{C}1) = 0.01$$

$$\rho(\text{O}) = 0.04$$

**aMOx-TS3-trans-si<sup>a</sup>**  
 $\Delta G^\ddagger = 0.8$  ( $\Delta E^\ddagger = 0.5$ )

$$\angle \text{H-C1-C2-C(Ph)} = 115.0^\circ$$

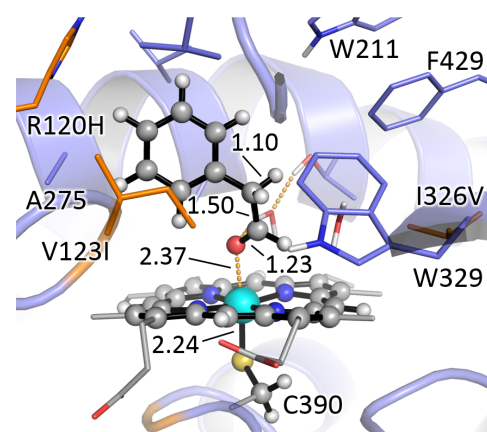

View 1

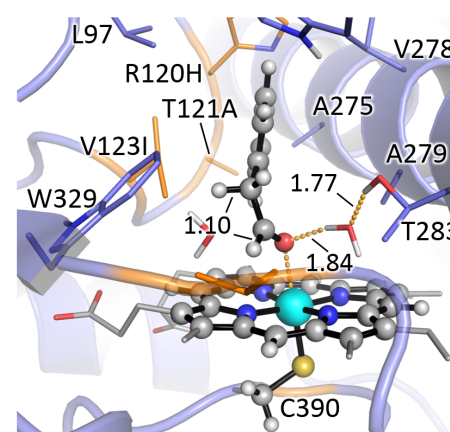

View 2

**aMOx-3<sup>d</sup>**  
 $\Delta G_r = -41.5$  ( $\Delta E_r = -41.9$ )

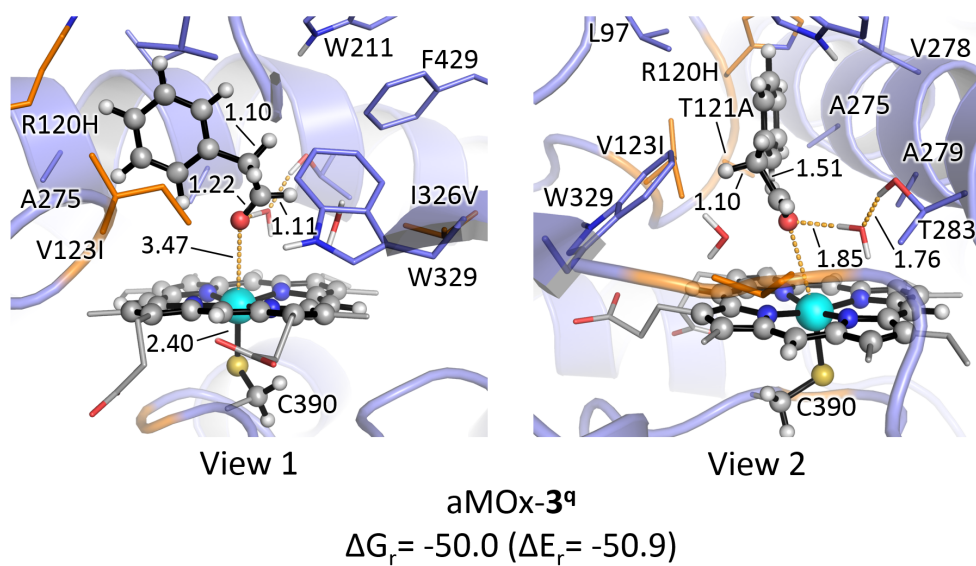

D)  
D.1)

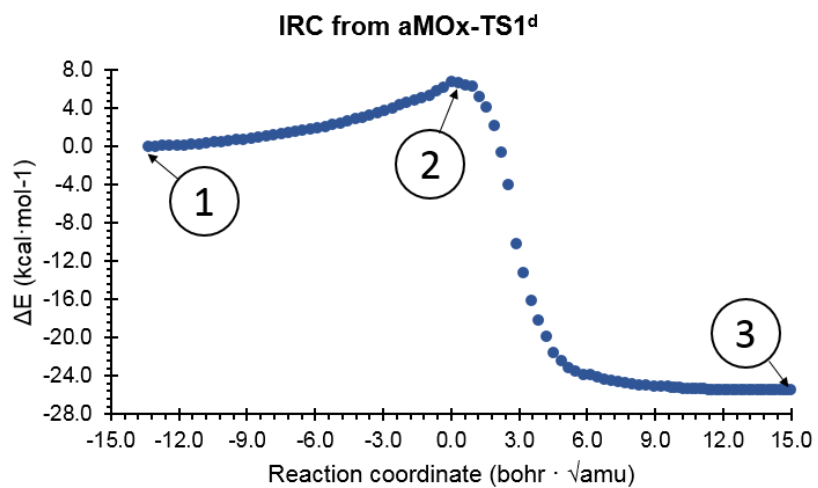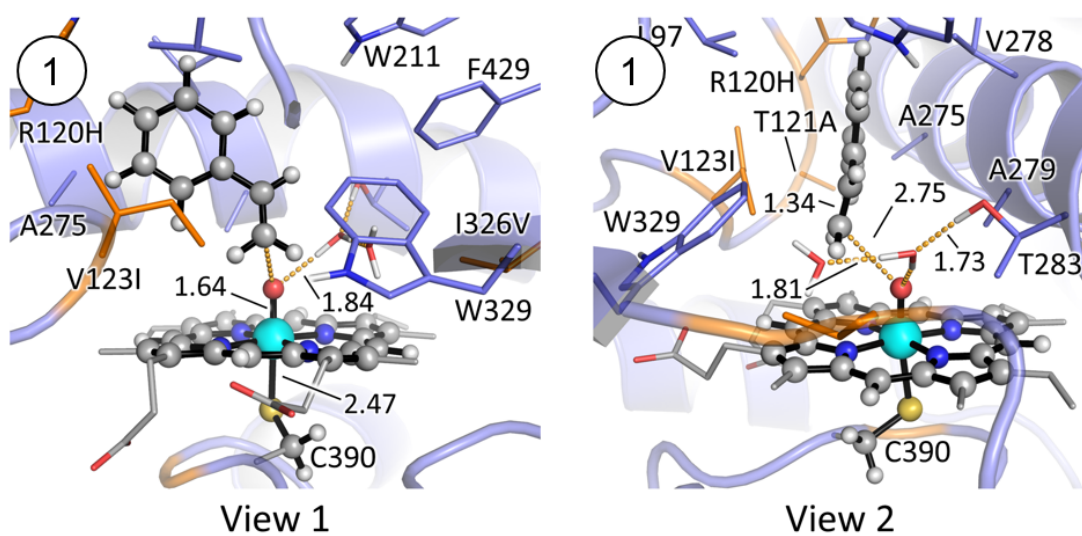

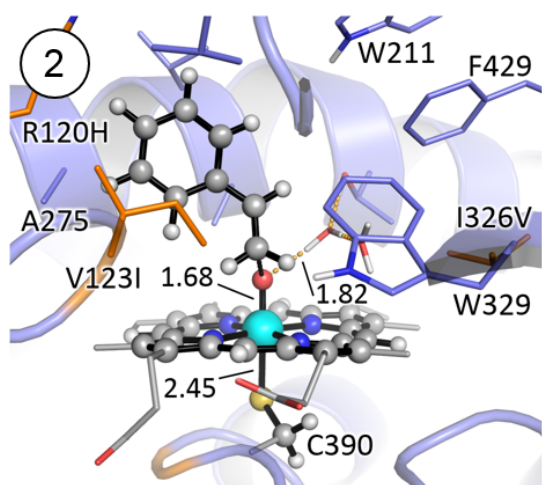

View 1

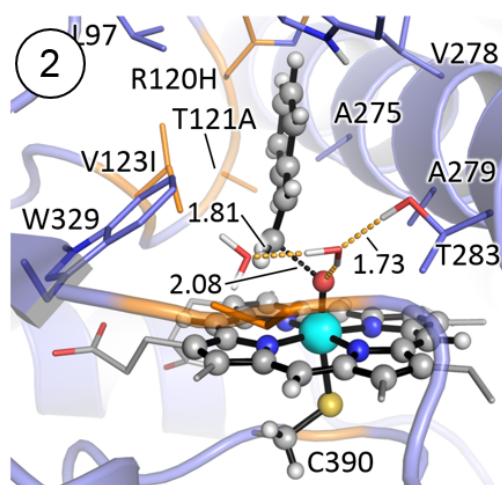

View 2

aMOx-TS1<sup>d</sup>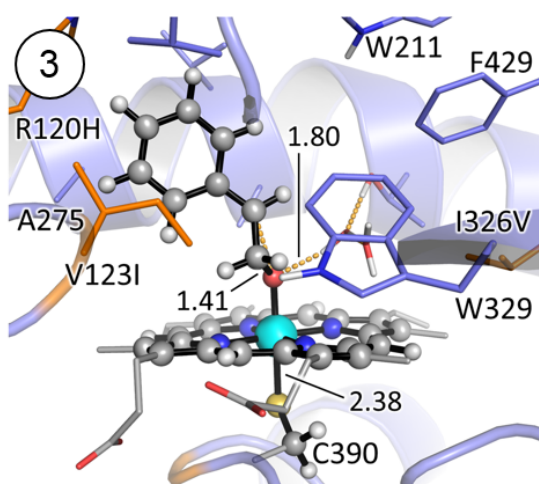

View 1

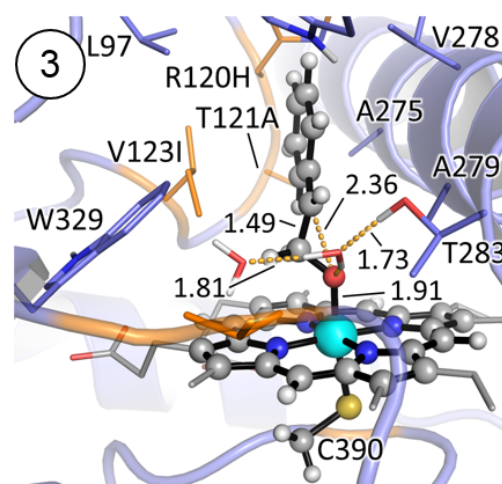

View 2

D.2)

IRC from aMOx-TS1<sup>d</sup>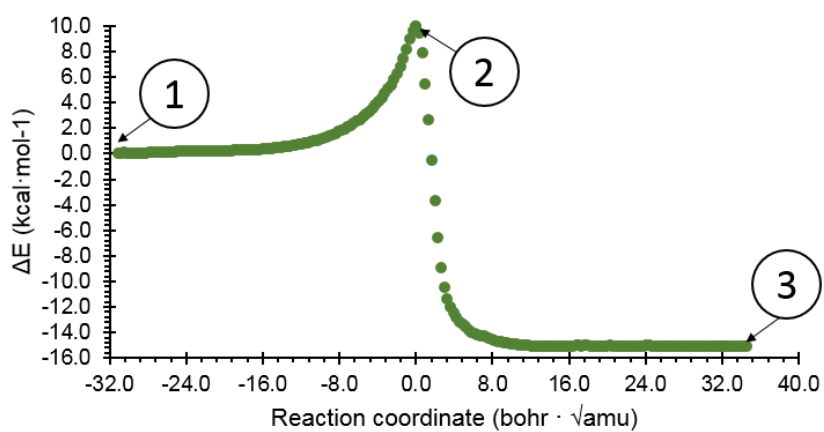

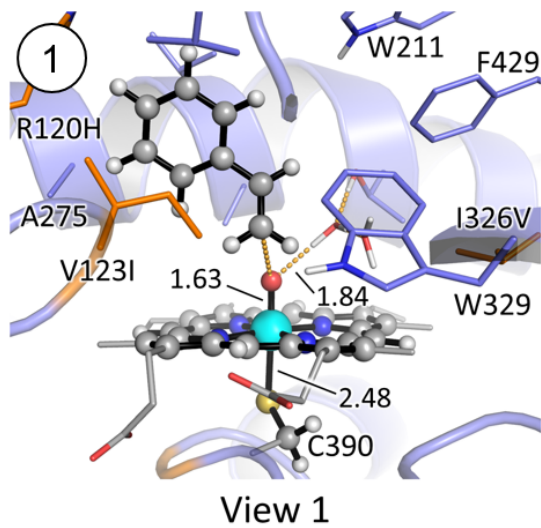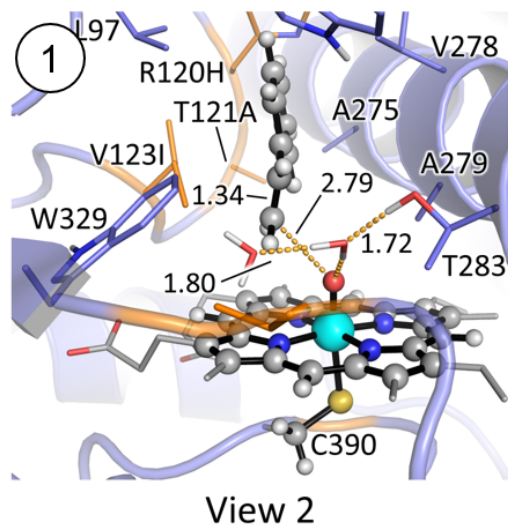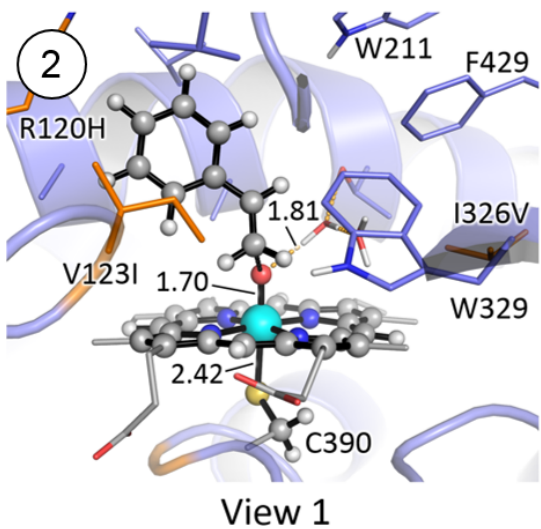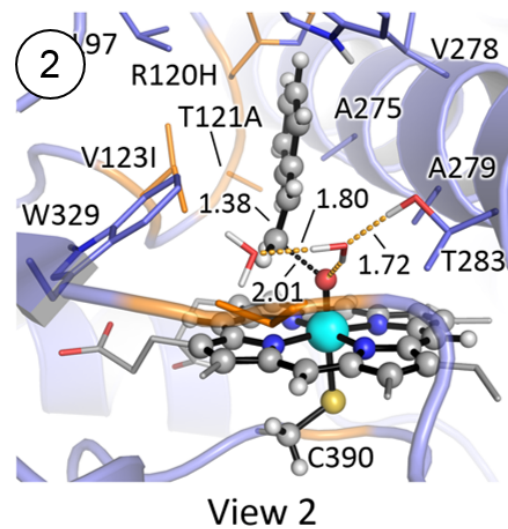

aMOx-TS1<sup>a</sup>

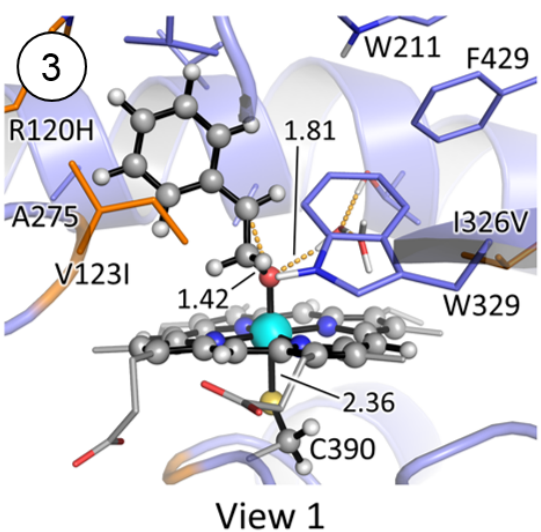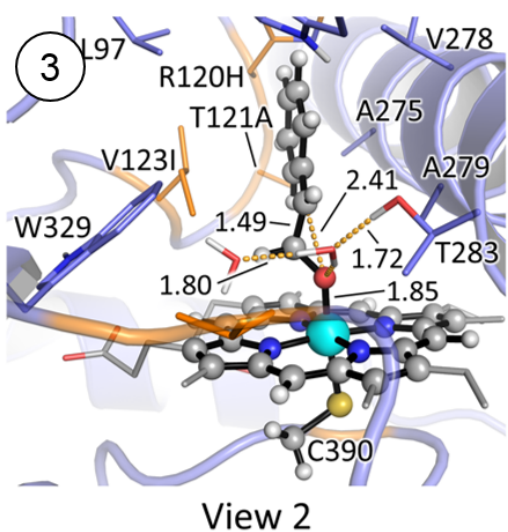

E) Reverse IRC from aMOx-TS3-trans-si<sup>a</sup>

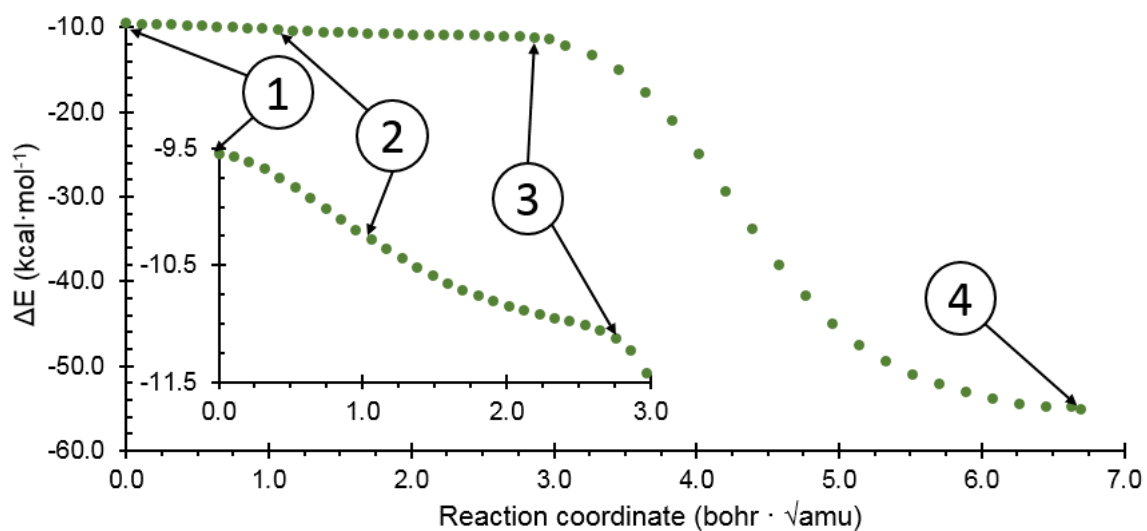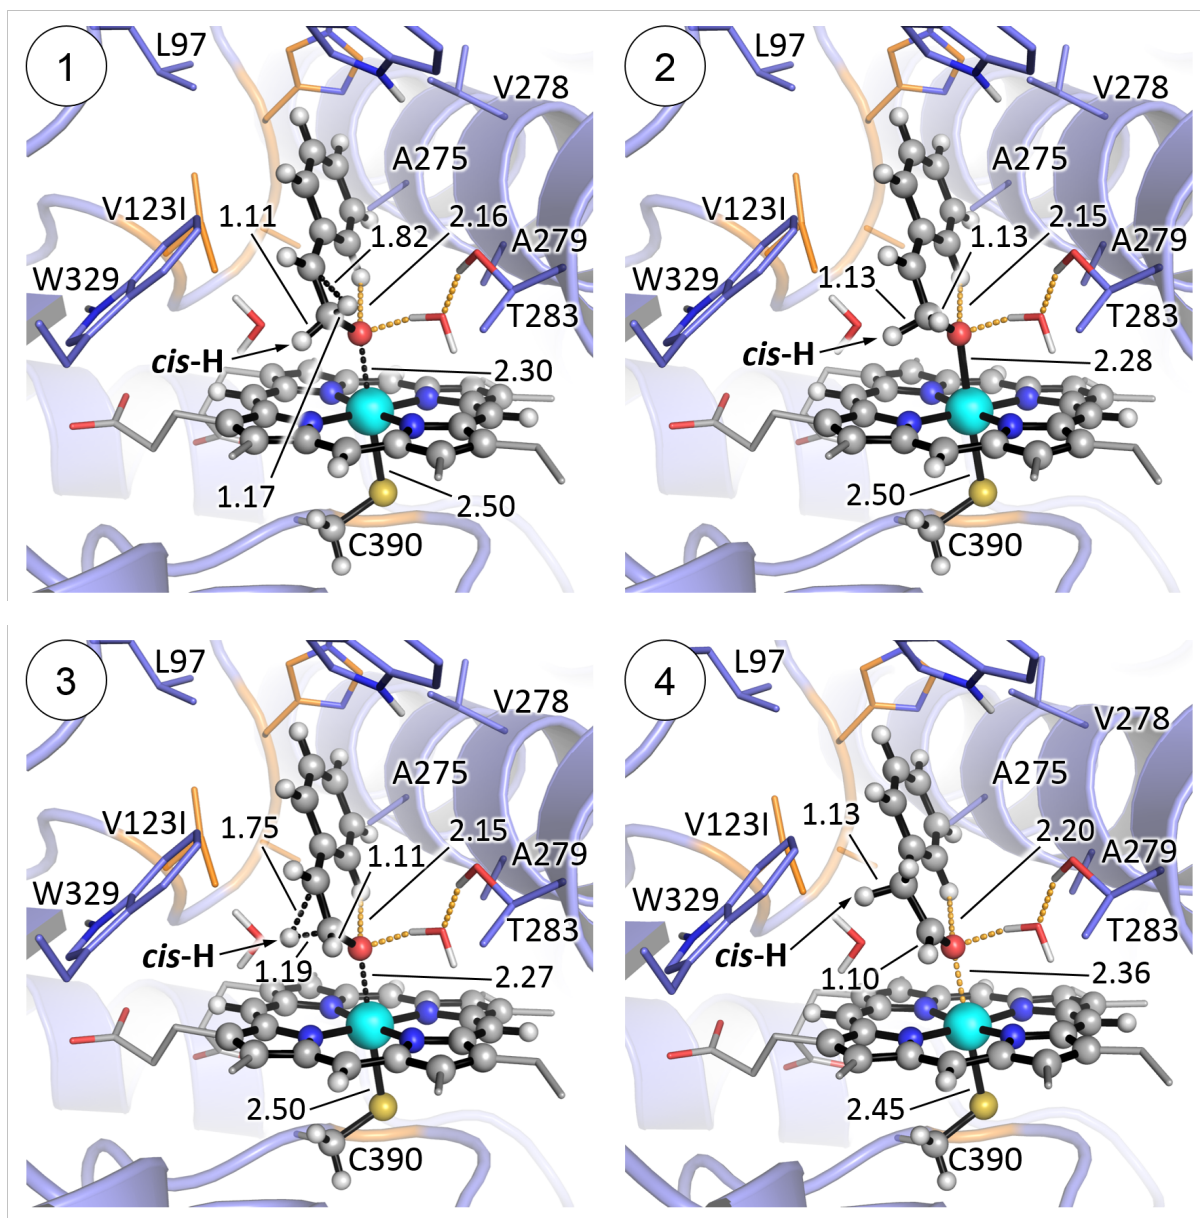

The near attack conformation of styrene considered here corresponds to the major NAC binding pose characterized from MD simulations, with styrene bound exposing the *re* face to the iron-oxo species (see **Figure S11**). This particular binding mode would lead to the formation of the experimentally observed *S*-epoxide product as side product, considering no radical epimerization.

For the reaction occurring in aMOx active site, the covalent radical intermediate aMOx-**Int1** formed from a *re* face NAC in the quartet and doublet electronic states can be optimized as a minimum on the potential energy surface (PES). This is similar to what it is found for P450<sub>LA1</sub> modelled reaction, and it is indicating that the enzyme active site can stabilize these reactive intermediates due to confinement, as compared to the free-enzyme model system (see **Figure S1**), where the radical intermediate in the doublet electronic state could not be optimized.

The optimized radical intermediates in aMOx active site (aMOx-**Int1**) have a slightly distorted geometry, as compared to the free-enzyme optimized **Int1<sup>q</sup>** geometry, which stabilizes the radical intermediate and makes it less reactive. This geometric distortion is induced by the interactions occurring with surrounding residues in the active site (see **Figure S20**), and strongly disfavors the epoxide ring closing through aMOx-**TS2** in both electronic states (doublet and quartet). aMOx-**Int1<sup>q</sup>** is ca. 4 kcal·mol<sup>-1</sup> more stable than aMOx-**Int1<sup>d</sup>**.

Epoxide ring closing transition state (aMOx-**TS2**) could be optimized for both electronic states as opposite to the P450<sub>LA1</sub> catalyzed reaction (**Figures S14 and S15**), where epoxide ring closing is found to be barrierless from the radical intermediate in the doublet electronic state, and in contrast to the enzyme-free reaction (**Figure S1**), where epoxidation in the doublet state is found to be asynchronous but concerted from first TS1. Significant energy barriers for aMOx-**TS2** transition states are found for each electronic state. In addition, aMOx-**TS2** transition states are higher in energy than the carbocation intermediates aMOx-**Int2** in both doublet and quartet electronic state.

Carbocation formation (aMOx-**Int2**) from radical intermediate aMOx-**Int1** is energetically disfavored in the two studied PES (doublet and quartet). This is caused by the geometric steric control imposed by aMOx active site (see also **Figure S20**), that stabilizes the radical intermediate over the carbocation. A conformational change of aMOx-**Int1** is required to form aMOx-**Int2**, which involves the rotation of the methylene group covalently attached to the O-atom to ensure effective stabilization of the carbocation intermediate due to stereoelectronic effects. The doublet aMOx-**Int2** is more stable than the quartet, suggesting that carbonyl formation might be occurring through this aMOx-**Int2<sup>d</sup>** intermediate.

The steric conformational control imposed by aMOx active site to the radical intermediate (aMOx-**Int1**) largely disfavors the epoxide forming transition state, which is intrinsically favored due to the existing *dynamic match* between TS1 and TS2. Consequently, the steric control due to confinement in aMOx active site allows the thermal equilibration of the aMOx-**Int1** radical intermediate, overriding the intrinsic *dynamic* preferences, and preferentially following the lowest in energy carbonyl formation pathway through the generation of the carbocation intermediate aMOx-**Int2**.

Once carbocation intermediate is formed (aMOx-**Int2**), hydride migration occurs selectively for the *cis* hydrogen atom through the *re* face, via a barrierless aMOx-**TS3-cis-re** transition state in both the doublet and quartet PES. On the other hand, transition states for the migration of the *trans* hydrogen atom through the *re* face, via **TS3-trans-si** transition states, are ca.  $\Delta\Delta G = 2$

kcal·mol<sup>-1</sup> higher in energy than the corresponding **TS3-cis-re** in the doublet and quartet electronic states. This is due to the preorganized geometry of aMOx-**Int2** intermediates when formed in aMOx active site. Within this geometry, induced by steric restraints imposed by surrounding active site residues, *cis*-H atom is well aligned with the empty *p* orbital on the carbocation C atom for an effective migration from the *re* face of the intermediate (see also **Figure S21**). On the other hand, from this conformation, *trans*-H atom is not well aligned for migrating. Conformational control enables the enantioselective 1,2-hydride migration as corroborated by experiments with deuterated styrene substrates (see **Figures S33** and **S34**).

Due to its high reactivity, aMOx-**Int2**<sup>q</sup> and aMOx-**TS3-cis-re**<sup>q</sup> in the quartet electronic state could only be optimized applying a set of geometrical restraints (using Gaussian *Modredundant* routine).

aMOx-**Int2**<sup>q</sup> structure was optimized with C2-*cis*-H, C2-*trans*-H, and *cis*-H-*trans*-H distances frozen (using the reference values from optimized structure in the doublet state), in order to avoid spontaneous migration during optimization. Subsequent full frequency calculation showed that the optimized aMOx-**Int2**<sup>q</sup> structure has all the frequencies positive.

aMOx-**TS3-cis-re**<sup>q</sup> structure was optimized with C2-*cis*-H, C1-*cis*-H and O-C1 distances frozen (using the values from optimized structure in the doublet state). Subsequent full frequency calculation showed that the optimized aMOx-**TS3-cis-re**<sup>q</sup> structure has only one imaginary frequency corresponding to the H-migration coordinate.

Intrinsic reaction coordinate (IRC) calculations starting from the fully optimized aMOx-**TS3-trans-si**<sup>q</sup> support the high reactivity of carbocation intermediate aMOx-**Int2**<sup>q</sup> in the quartet electronic state. From the reverse IRC calculated starting from the fully optimized aMOx-**TS3-trans-si**<sup>q</sup> (**Figure S19-D**), a geometry similar to the optimized aMOx-**Int2**<sup>q</sup> structure (see earlier) is explored, however it is not considered as a minimum on the PES by the algorithm. Consequently, the IRC calculation proceeds, and it leads to the spontaneous migration of the *cis*-H through a geometry similar to the aMOx-**TS3-cis-re**<sup>q</sup> optimized structure, to finally form the phenyl aldehyde product (**3**) with an *R*-configuration. This is indicating that, in the quartet electronic state, 1,2-hydride migration involving the *cis*-H atom from the *re* face is highly favored as compared to the *trans*-H migration from the *si* face once the carbocation intermediate aMOx-**Int2**<sup>q</sup> is formed.

Finally, the alternative pro-*R* epoxidation aMOx-**TS2** transition states, leading to *R*-epoxide product from radical intermediate aMOx-**Int1**, were also optimized using QM/MM calculations. Calculations show that energy barriers associated to pro-*R* epoxidation aMOx-**TS2** for each electronic state, are much higher than those for the pro-*S* epoxide formation. This is in line with the active site reshaping characterized from MD simulations, which already indicated that pro-*S* epoxidation (*re* face) catalytically relevant binding modes are favored in aMOx active site, being the pro-*R* (*si* face) ones disfavored due to sterics. These QM/MM results are also in line with the high *S*-epoxide enantioselectivity experimentally observed.

**Figure S20:** QM/MM optimized structures of key intermediates formed in aMOx variant active site: **A)** covalent radical intermediate (aMOx-Int1<sup>q</sup>); and **B)** covalent carbocation intermediate (aMOx-Int2<sup>d</sup>). Lowest in energy electronic states are considered (see **Figure S19**).

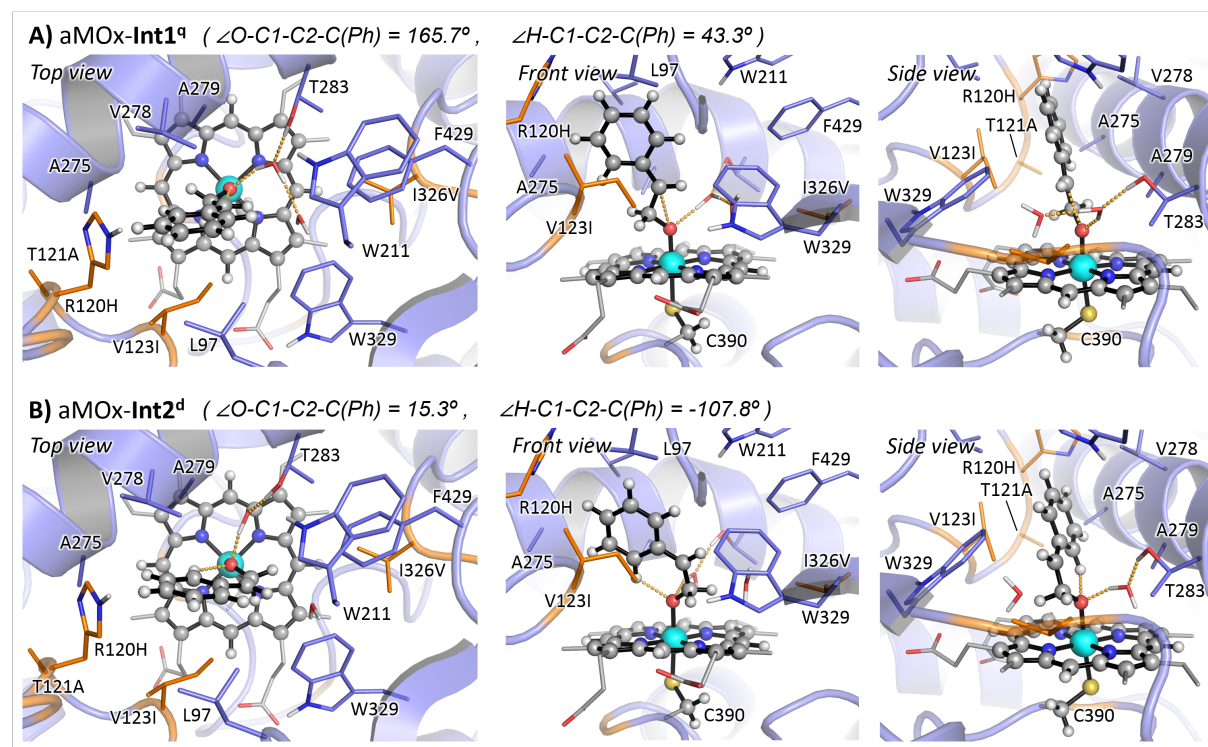

Radical intermediate optimized in aMOx active site (aMOx-Int1) has the phenyl ring oriented in an anti-periplanar conformation with respect to the O–Fe group, as described by the  $\angle(O-C1-C2-C(Ph))$  dihedral angle ( $\angle(O-C1-C2-C(Ph)) = 165.7^\circ$ ). This is due to steric restrictions imposed by active site residues L97, W211, V278, A279, W329, and F429.

For an effective epoxide ring closing, the radical localized on the C2 atom *p* orbital has to be syn-periplanar to the O–Fe group allowing an efficient orbital overlap leading to the C2–O bond formation. This is described by the value of  $\angle(O-C1-C2-C(Ph))$  angle in the ideal enzyme-free epoxide forming TS2 ( $\angle(O-C1-C2-C(Ph))$  is ca.  $93^\circ$ ) (see **Figure 2** in the main text, and **Figure S1**). The  $\angle(O-C1-C2-C(Ph))$  dihedral angle value in the QM/MM optimized aMOx-TS2<sup>d</sup> is ca.  $127^\circ$ , which describes a large geometric distortion from the ideal enzyme-free structure, and that causes a dramatic increase of the activation barrier for the epoxide ring closing in aMOx active site (see also discussions in **Figure S19**). Consequently, geometric control due to confinement in aMOx active site stabilizes the radical intermediate in a conformation that highly disfavors epoxidation.

Covalent carbocation intermediate (aMOx-Int2) conformation in aMOx is also distorted due to confinement as compared to the optimal one characterized from enzyme-free model calculations (**Figure 2** in the main text, and **Figure S1**). Within this conformation, stereoelectronic stabilization of the carbocation intermediate can effectively occur, but there exists a slight distortion of aMOx-Int2 along the  $\angle(Fe-O-C1-C2)$  dihedral angle ( $\angle(Fe-O-C1-C2) = -161.9^\circ$ ) as compared to the free-enzyme system ( $\angle(Fe-O-C1-C2) = -178.5^\circ$ ). This geometric distortion preorganizes *cis*-H for a preferential 1,2-hydride migration from the *re* face of the intermediate by aligning it with the empty *p* orbital of the carbocation C center



( $\angle(\text{cis-H-C1-C2-C(Ph)}) = -107.8^\circ$  ,  $\angle(\text{trans-H-C1-C2-C(Ph)}) = 151.2^\circ$  see also discussions in **Figure S21**).

QM/MM optimized aMOx-**Int1** and aMOx-**Int2** structures have the phenyl ring of the intermediate tightly packed by hydrophobic L97, V123I, W211, V278, A279, W329, and F429 active site residues, occupying the same position in aMOx active site. The main difference between the two intermediate structures is the positioning of the methylene-O group in the active site pocket. In the radical aMOx-**Int1**, the methylene-O group is oriented to the left-handed side of the cavity (from a front view perspective), while it is oriented to the right-handed side in the optimized carbocation aMOx-**Int2** structure, directly pointing to the I326V position. It is important to highlight that original I326 residue is mutated in aMOx to a less bulkier valine (I326V), which makes more space for positioning the methylenidene group at this position, and thus contributing to the geometric control and preorganization of aMOx-**Int2** for an enantioselective 1,2-hydride migration.

**Figure S21:** Active site packing occurring in aMOx QM/MM optimized key transition states: **A) aMOx-TS2** ; and **B) aMOx-TS3**. Only lowest in energy electronic states are considered here (see **Figure S19**). For each QM/MM optimized structure two different orientations (side and top view) are shown, using two different representation models with and without space-filling model for key active site residues (L97, W211, V278, A279, W329, and F429).

**A) aMOx-TS2<sup>d</sup>**

(side view)

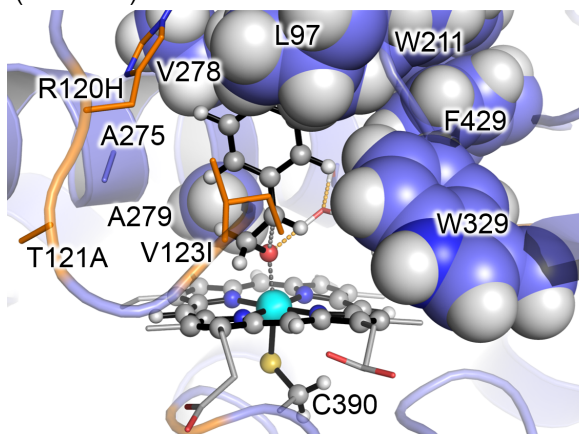

(top view)

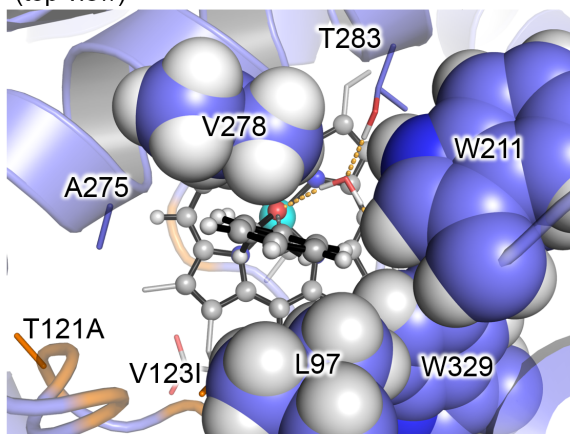

(side view, no space-filling model representation)

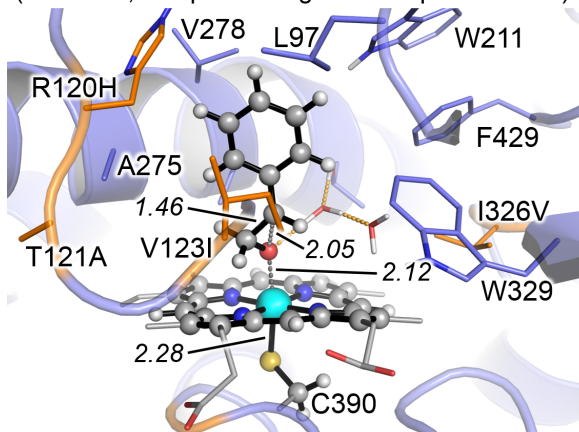

(top view, no space-filling model representation)

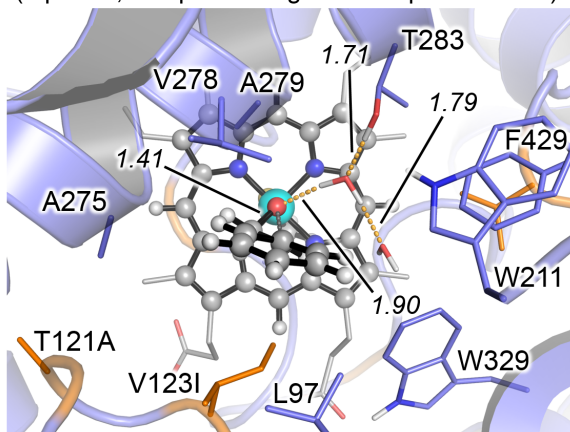

**B) aMOx-TS3<sup>d</sup>**

(side view)

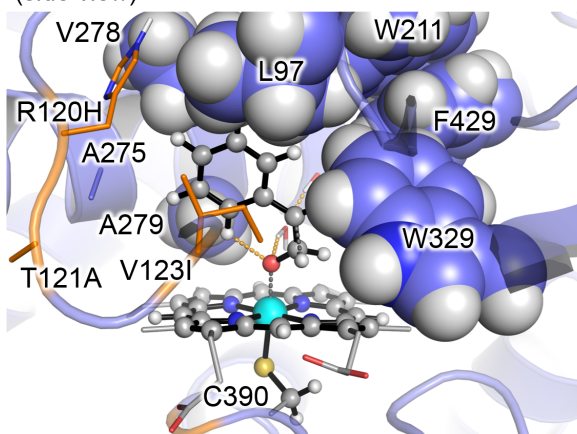

(top view)

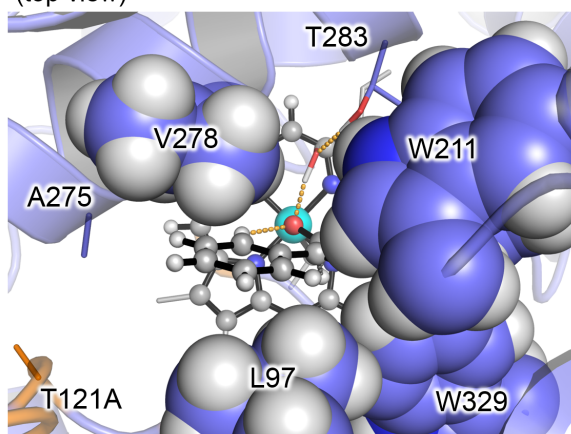

(side view, no space-filling model representation)

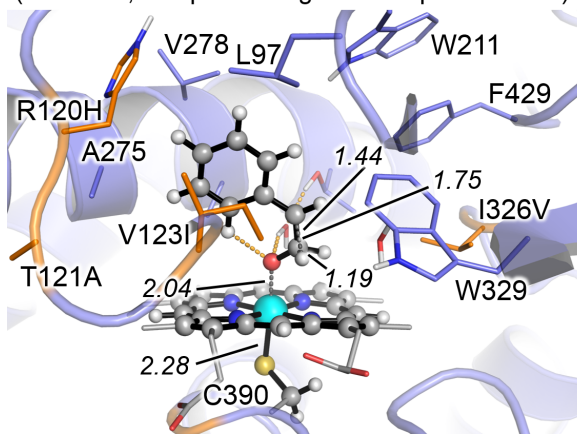

(top view, no space-filling model representation)

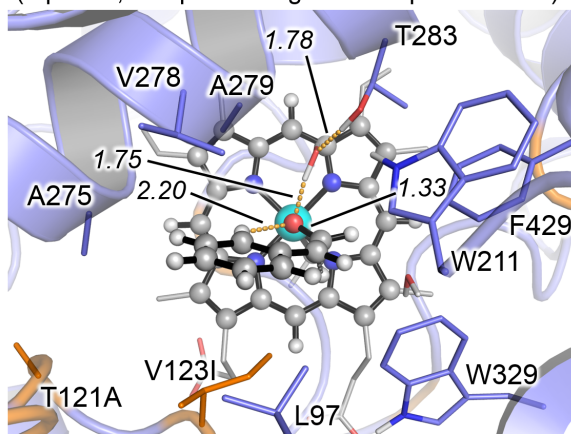

aMOx active site packing significantly increases the activation barrier of aMOx-TS2 (doublet and quartet), mainly due to steric interactions with L97, W211, V278, W329, and F429 residues (see discussion in **Figure S19**).

Similar interactions occurring in the optimized aMOx-TS3 (in both doublet and quartet electronic states). These interactions favor a slight distortion of aMOx-Int2 along the  $\angle(\text{Fe-O-C1-C2})$  dihedral angle ( $\angle(\text{Fe-O-C1-C2}) = -161.9^\circ$ , **Figure S20**) as compared to the free-enzyme system ( $\angle(\text{Fe-O-C1-C2}) = -178.5^\circ$ , **Figure S1**). This geometric distortion preorganizes *cis*-H for a preferential 1,2-hydride migration over *trans*-H, by aligning it with the empty *p* orbital of the carbocation C center (see discussion in **Figure S19**).

**Figure S22:** QM/MM calculations were used to study the rotation of the C1–C2 bond in the covalent radical intermediate formed in the aMOx active site, for both doublet (q) and quartet (q) electronic states (aMOx-**Int1**<sup>d</sup> and aMOx-**Int1**<sup>q</sup>, **Figure S19**).

**A)** QM/MM relaxed scan calculations were carried out along the rotation of  $\angle(\text{O-C1-C2-C}(\text{Ph}))$  dihedral angle starting from the optimized radical intermediate species in the doublet and quartet states (aMOx-**Int1**<sup>d</sup>  $\angle(\text{O-C1-C2-C}(\text{Ph}))$  ca.  $-166.1^\circ$ ; and aMOx-**Int1**<sup>q</sup>  $\angle(\text{O-C1-C2-C}(\text{Ph}))$  ca.  $-165.7^\circ$ ). Calculations were carried out using the mechanical embedding (ME) approach and at the (U)B3LYP/6-31G(d)+SDD(Fe):Amber FF14SB level.

**B)** Single point calculations were performed on the optimized points along the relaxed scan coordinate reported in **A**), but using an electrostatic embedding (EE) scheme and at (U)B3LYP/Def2TZVP:Amber FF14SB level.

**C)** QM/MM optimized rotation transition states (**TS-rotation**<sup>q</sup> and **TS-rotation**<sup>d</sup>) in both doublet and quartet electronic states. They were optimized starting from the highest in energy point on the relaxed scan coordinates (**A**). Mulliken charges ( $q$ ) and spin densities ( $\rho$ ) for the phenyl group (sum of all C and H atoms), C2 benzylic position, C1 and O are given in a.u. These transition states connect the corresponding radical intermediate aMOx-**Int1** and aMOx-**Int2**-like geometry with radical character.

**D)** QM/MM computed relative stabilities in terms of electronic energy at the QM region ( $\Delta E_{\text{QM}}$ ), QM/MM ONIOM electronic energy ( $\Delta E$ ), enthalpy ( $\Delta H$ ), and Gibbs energy ( $\Delta G$ ) for the transition state associated to C1-C2 rotation. Energy values were obtained at the (U)B3LYP/Def2TZVP:AmberFF14SB/(U)B3LYP/631G(d)+SDD(Fe):Amber FF14SB level. Doublet (d) and quartet (q) electronic states were considered, and all energies are referred considering the lowest in energy aMOx-**Int1**<sup>q</sup> structure as zero.

Energies, distances, Mulliken charges and spin density values are given in kcal·mol<sup>-1</sup>, Angstrom (Å), and a.u., respectively.

**A)**

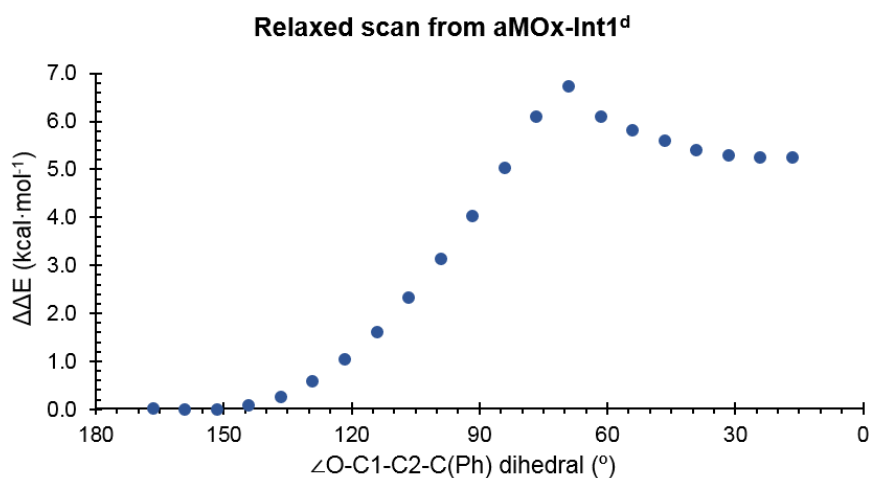

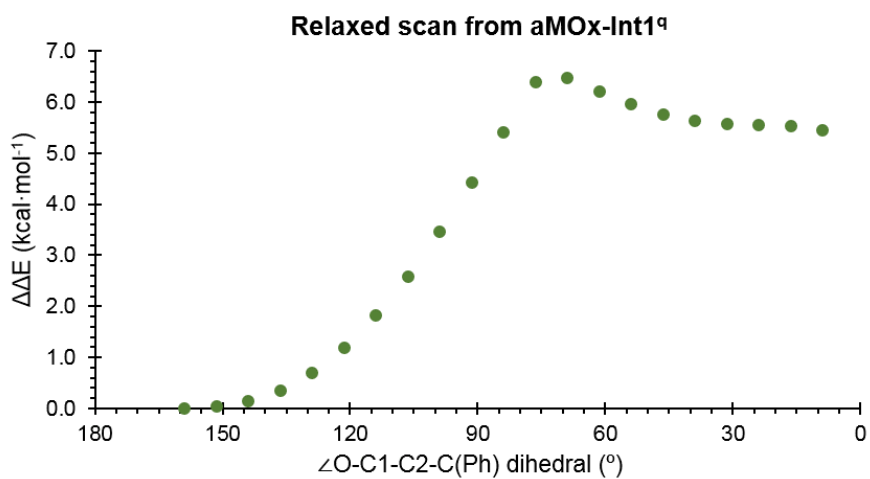

**B)**

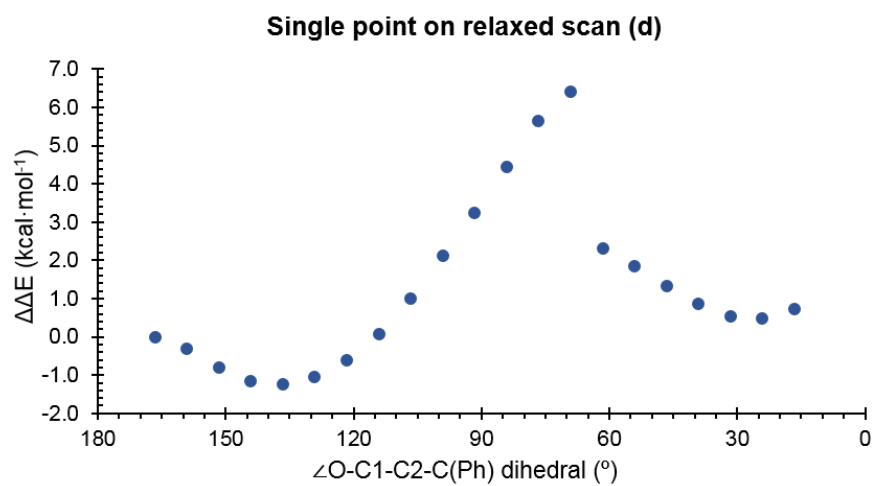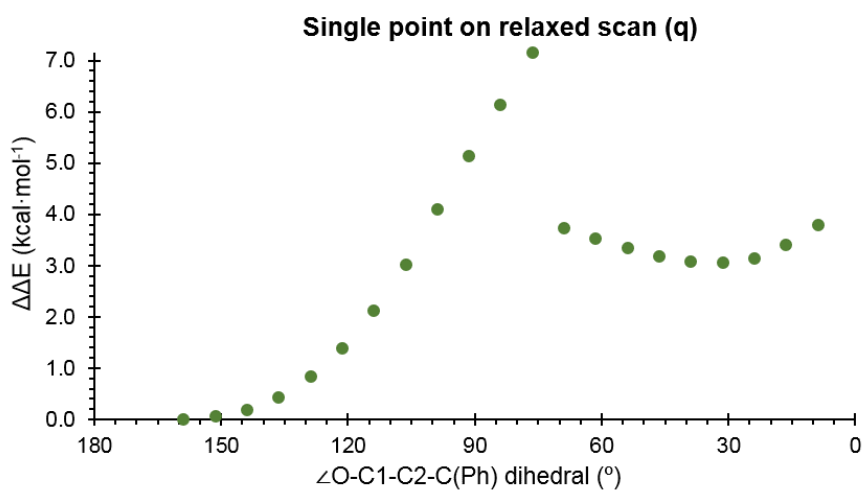

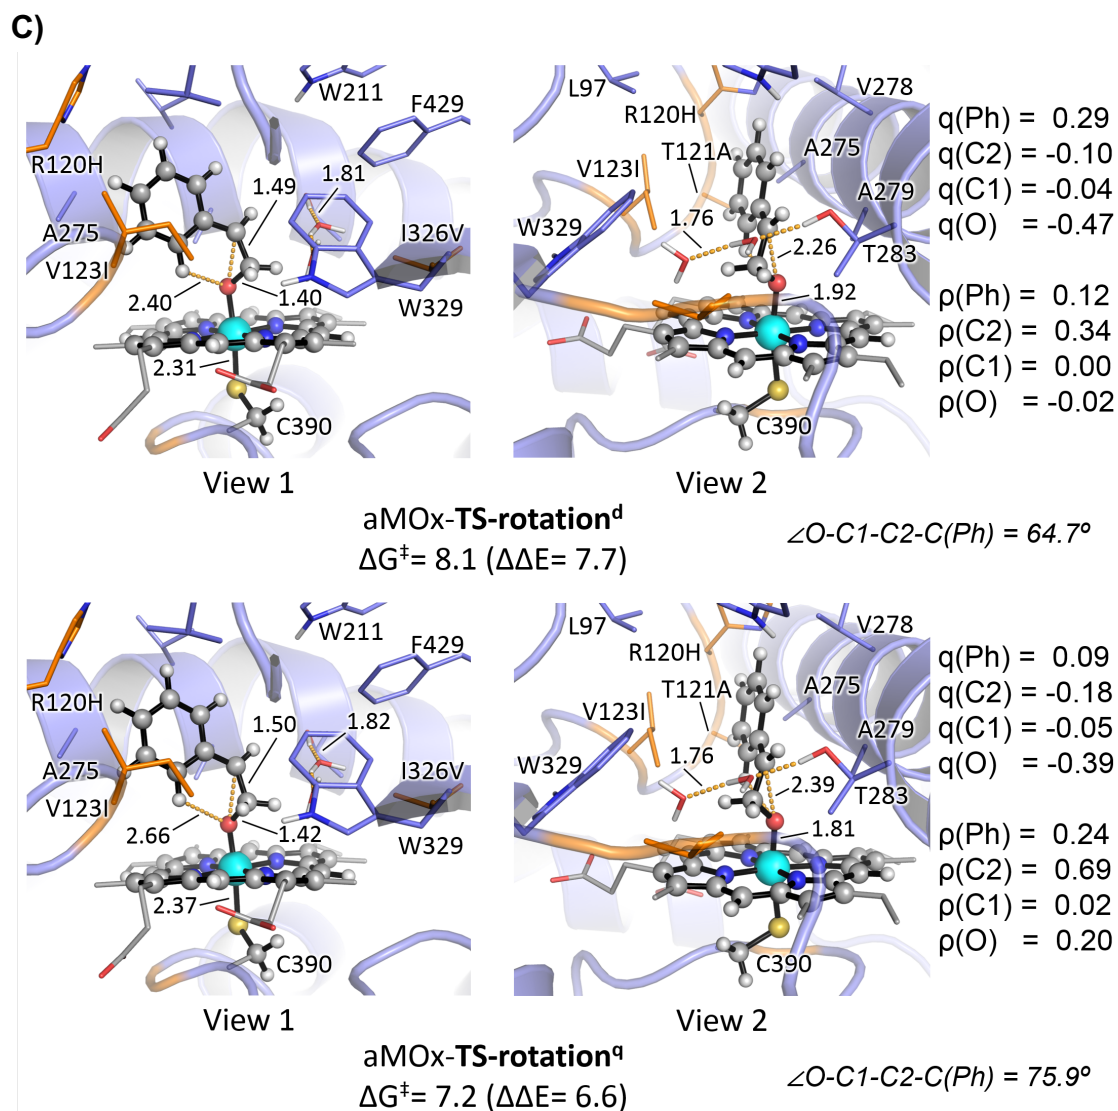

**D)**

| Structure                        | Electronic State | $\Delta\Delta E_{QM}$ | $\Delta\Delta E$ | $\Delta\Delta H$ | $\Delta\Delta G$ |
|----------------------------------|------------------|-----------------------|------------------|------------------|------------------|
| aMOx-Int1 <sup>a</sup>           | doublet (d)      | -0.6                  | 3.7              | 3.2              | 4.0              |
|                                  | quartet (q)      | 0.0                   | 0.0              | 0.0              | 0.0              |
| aMOx-TS2 <sup>a</sup><br>(pro-S) | doublet (d)      | 4.2                   | 7.2              | 7.6              | 9.7              |
|                                  | quartet (q)      | 3.8                   | 9.4              | 9.3              | 10.7             |
| aMOx-TS-rotation                 | doublet (d)      | 10.7                  | 11.4             | 10.6             | 12.1             |
|                                  | quartet (q)      | 8.4                   | 6.6              | 5.6              | 7.2              |
| aMOx-Int2 <sup>a</sup>           | doublet (d)      | -10.0                 | 5.4              | 4.7              | 5.9              |
|                                  | quartet (q)      | -8.0                  | 10.8             | 9.5              | 9.1              |

<sup>a</sup> From Figure S19

Focusing on the lowest in energy electronic state, quartet, QM/MM relaxed scan calculations indicated the existence of a significant energy barrier for the rotational conformational change that connects aMOx-Int1<sup>a</sup> and an aMOx-Int2-like geometry, around ca. 7 kcal·mol<sup>-1</sup> in electronic energy. Starting from the highest in energy point on the relaxed scan rotational

coordinate ( $\angle\text{O-C1-C2-C(Ph)}$  ca.  $70^\circ$ ,  $\Delta E$  ca.  $7.0 \text{ kcal}\cdot\text{mol}^{-1}$ ), a rotational transition state **aMOx-TS-rotation<sup>a</sup>** was fully optimized, with a  $\Delta G^\ddagger = 7.2 \text{ kcal}\cdot\text{mol}^{-1}$  ( $\angle\text{O-C1-C2-C(Ph)} = 75.9^\circ$ ). This is a significant rotational barrier as compared to what was found for the enzyme-free system (see **Figure S2**) and the wildtype LA1 system (see **Figure S18**), which is attributed to the higher confinement and packing that the radical intermediate has in the evolved aMOx active site. Although higher, this rotational barrier that converts **aMOx-Int1** to a **aMOx-Int2**-like geometry is significantly lower (ca.  $3.5 \text{ kcal}\cdot\text{mol}^{-1}$  lower) than the epoxide forming barrier **aMOx-TS2** ( $\Delta G^\ddagger = 10.7 \text{ kcal}\cdot\text{mol}^{-1}$ , see **Figure S19**).

Consequently, these new results further support the conclusion that a strong conformational control over the radical reactive intermediate is responsible for the carbonyl formation over the epoxide formation promoted by the laboratory evolved aMOx enzyme active site.

**Figure S23:** QM/MM exploration of aMOx variant catalyzed oxidation of styrene (**1**) substrate. QM/MM calculations were carried out starting from a MD-relaxed structure of the covalent intermediate (**Int1**) formed in aMOx active site (**Figure S13-B**), that mimics the minor explored, catalytically relevant, binding pose of styrene substrate characterized from restrained-MD simulations (green marker selected snapshot in **Figure S11**). This corresponds to a styrene binding pose with its *si* face exposed to the iron-oxo species (pro-*R* epoxidation).

**A)** QM/MM computed relative stabilities in terms of electronic energy at the QM region ( $\Delta E_{\text{QM}}$ ), QM/MM ONIOM electronic energy ( $\Delta E$ ), enthalpy ( $\Delta H$ ), and Gibbs energy ( $\Delta G$ ) for the different optimized species. Energy values were obtained at the (U)B3LYP/Def2TZVP:AmberFF14SB//(U)B3LYP/6-31G(d)+SDD(Fe):AmberFF14SB level, with the same MM parameters used in MD simulations. An Electrostatic Embedding was used (see computational details). Doublet (d) and quartet (q) electronic states were considered, and all energies are referred considering the lowest in energy aMOx-**1**<sup>q</sup> structure as zero.

**B)** QM/MM calculated Gibbs free energy profile. Relative Gibbs free energies ( $\Delta G$ ) and electronic energies ( $\Delta E$ , in parenthesis) are reported.

**C)** QM/MM optimized structures. Atoms included in the QM region are shown in ball-and-stick representation, and residues in the MM region are shown in sticks. Mutated residues are highlighted in orange. Mulliken charges ( $q$ ) and spin density ( $\rho$ ) values for the phenyl group (Ph, sum of all C and H atoms), C2 benzylic position, C1 and O, are reported.

Energies, distances, and Mulliken charges and spin density values are given in kcal·mol<sup>-1</sup>, Angstrom (Å), and a.u., respectively.

**A)**

| Structure                 | Electronic State | $\Delta E_{\text{QM}}$ | $\Delta E$ | $\Delta H$ | $\Delta G$ |
|---------------------------|------------------|------------------------|------------|------------|------------|
| aMOx- <b>1</b>            | doublet (d)      | -1.3                   | -0.2       | -0.1       | 0.4        |
|                           | quartet (q)      | 0.0                    | 0.0        | 0.0        | 0.0        |
| aMOx- <b>TS1</b>          | doublet (d)      | 14.9                   | 29.3       | 28.7       | 30.4       |
|                           | quartet (q)      | 17.3                   | 25.8       | 24.8       | 25.6       |
| aMOx- <b>Int1</b>         | doublet (d)      | -7.6                   | 7.8        | 7.8        | 9.2        |
|                           | quartet (q)      | -7.2                   | 4.6        | 5.3        | 6.5        |
| aMOx- <b>TS2</b>          | doublet (d)      | -4.5                   | 10.2       | 10.2       | 12.8       |
|                           | quartet (q)      | -9.0                   | 7.4        | 7.5        | 9.4        |
| aMOx- <b>2-R</b>          | doublet (d)      | -35.5                  | -20.2      | -18.4      | -17.4      |
|                           | quartet (q)      | -45.8                  | -25.5      | -23.7      | -23.0      |
| aMOx- <b>Int2</b>         | doublet (d)      | -7.5                   | 1.5        | 1.1        | 3.2        |
|                           | quartet (q)      | -12.5                  | 3.2        | 2.2        | 2.9        |
| aMOx- <b>TS3-cis-si</b>   | doublet (d)      | -7.3                   | 2.2        | 0.9        | 3.1        |
|                           | quartet (q)      | -13.5                  | 3.2        | 1.6        | 2.7        |
| aMOx- <b>TS3-trans-re</b> | doublet (d)      | -6.4                   | 1.9        | 0.6        | 2.8        |
|                           | quartet (q)      | -13.2                  | 2.9        | 1.3        | 2.1        |
| aMOx- <b>3</b>            | doublet (d)      | -55.2                  | -48.7      | -47.1      | -47.4      |
|                           | quartet (q)      | -66.6                  | -53.3      | -52.0      | -53.9      |



**B)**

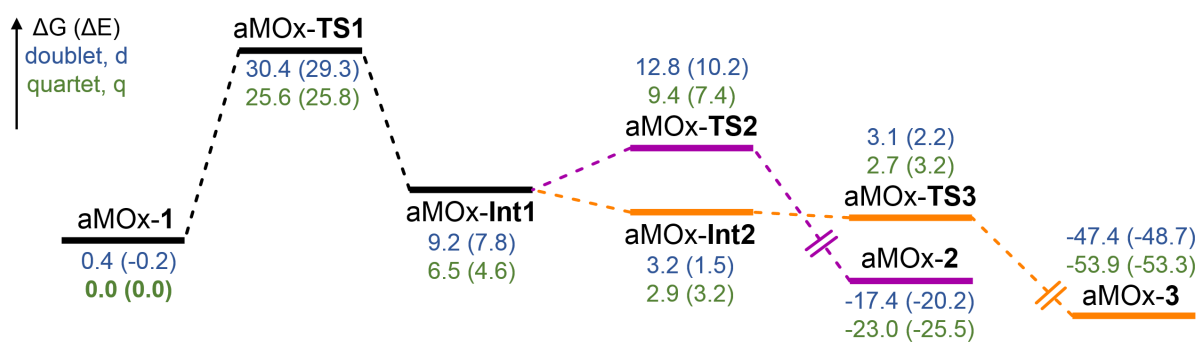

**C)**

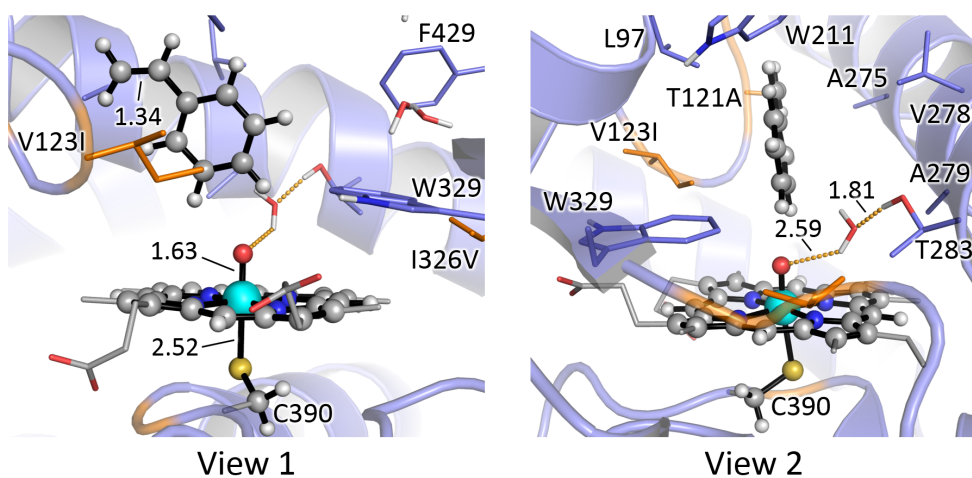

aMOx-1<sup>d</sup>  
 $\Delta G = 0.4$  ( $\Delta E = -0.2$ )

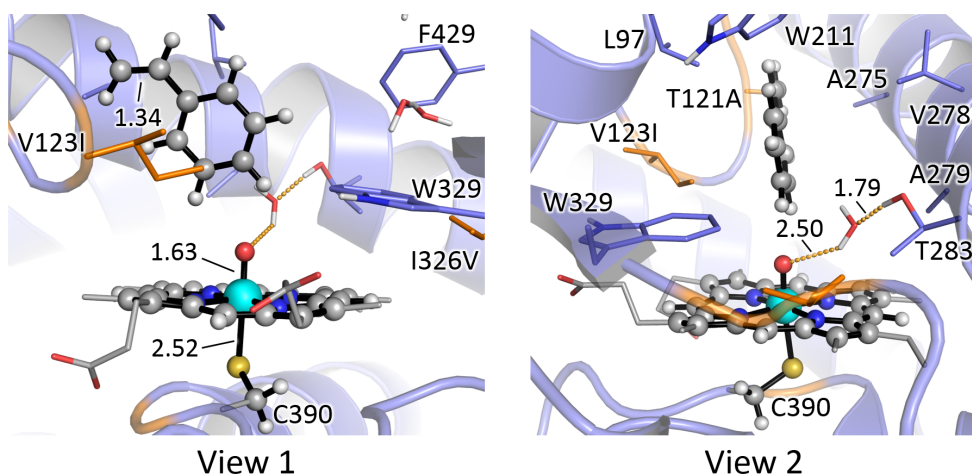

aMOx-1<sup>q</sup>  
 $\Delta G = 0.0$  ( $\Delta E = 0.0$ )

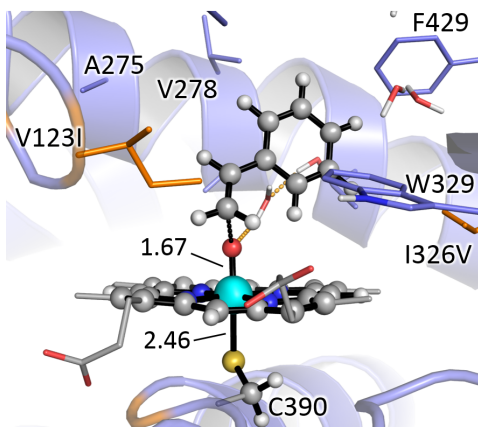

View 1

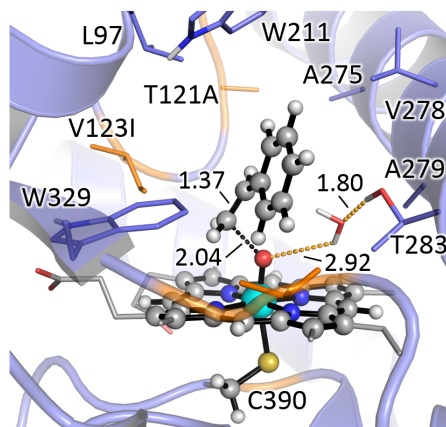

View 2

$$q(\text{Ph}) = 0.09$$

$$q(\text{C2}) = -0.08$$

$$q(\text{C1}) = -0.22$$

$$q(\text{O}) = -0.46$$

$$\rho(\text{Ph}) = -0.09$$

$$\rho(\text{C2}) = -0.26$$

$$\rho(\text{C1}) = 0.01$$

$$\rho(\text{O}) = 0.27$$

**aMOx-TS1<sup>d</sup>**  
 $\Delta G^\ddagger = 30.0$  ( $\Delta E^\ddagger = 29.5$ )

$$|\angle \text{Fe-O-C1-C2}| = 176.1^\circ$$

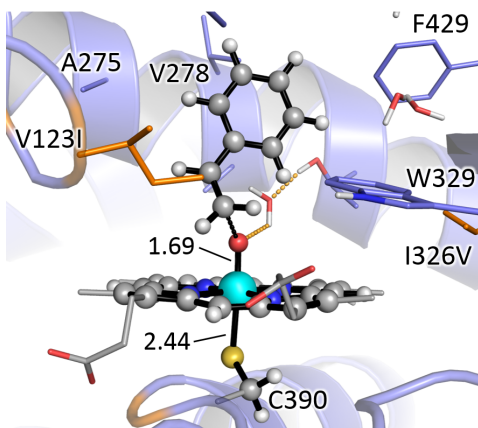

View 1

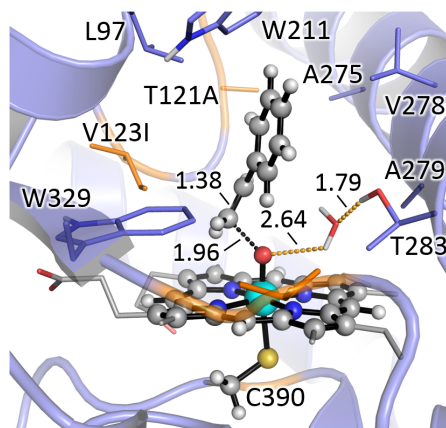

View 2

$$q(\text{Ph}) = 0.06$$

$$q(\text{C2}) = -0.16$$

$$q(\text{C1}) = -0.14$$

$$q(\text{O}) = -0.45$$

$$\rho(\text{Ph}) = 0.11$$

$$\rho(\text{C2}) = 0.36$$

$$\rho(\text{C1}) = -0.04$$

$$\rho(\text{O}) = 0.65$$

**aMOx-TS1<sup>q</sup>**  
 $\Delta G^\ddagger = 25.8$  ( $\Delta E^\ddagger = 25.6$ )

$$|\angle \text{Fe-O-C1-C2}| = 148.2^\circ$$

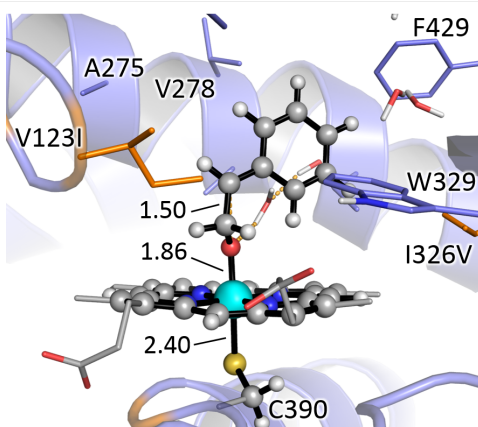

View 1

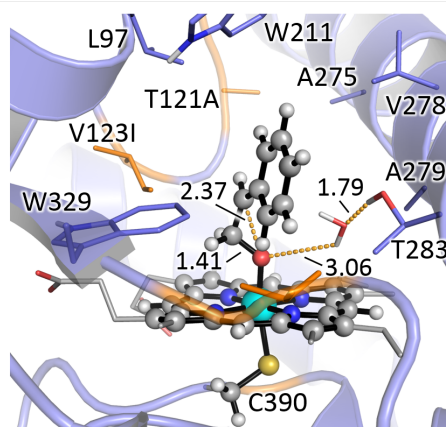

View 2

$$q(\text{Ph}) = 0.07$$

$$q(\text{C2}) = -0.14$$

$$q(\text{C1}) = 0.00$$

$$q(\text{O}) = -0.47$$

$$\rho(\text{Ph}) = 0.21$$

$$\rho(\text{C2}) = 0.61$$

$$\rho(\text{C1}) = 0.00$$

$$\rho(\text{O}) = 0.06$$

**aMOx-Int1<sup>d</sup>**  
 $\Delta G_r = 8.8$  ( $\Delta E_r = 8.0$ )  
 $\Delta \Delta G = 2.7$  ( $\Delta \Delta E = 3.2$ )

$$\angle \text{O-C1-C2-C(Ph)} = -60.6^\circ$$

$$\angle \text{H-C1-C2-C(Ph)} = 60.7^\circ$$

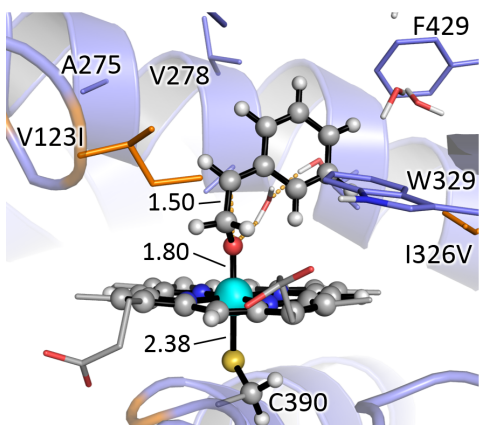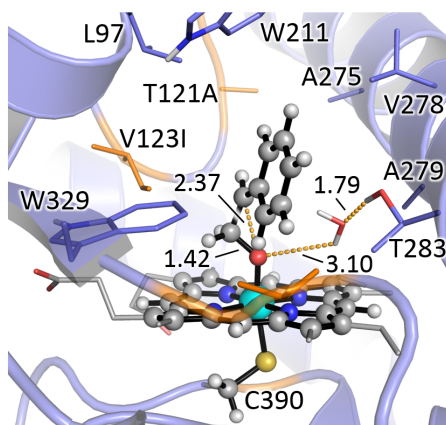

$$q(\text{Ph}) = 0.04$$

$$q(\text{C}2) = -0.17$$

$$q(\text{C}1) = -0.02$$

$$q(\text{O}) = -0.40$$

$$\rho(\text{Ph}) = 0.25$$

$$\rho(\text{C}2) = 0.71$$

$$\rho(\text{C}1) = 0.02$$

$$\rho(\text{O}) = 0.19$$

**aMOx-Int1<sup>a</sup>**  
 $\Delta G_r = 6.5$  ( $\Delta E_r = 4.6$ )  
 $\Delta\Delta G = 0.0$  ( $\Delta\Delta E = 0.0$ )

$$\angle\text{O-C1-C2-C(Ph)} = -59.2^\circ$$

$$\angle\text{H-C1-C2-C(Ph)} = 60.8^\circ$$

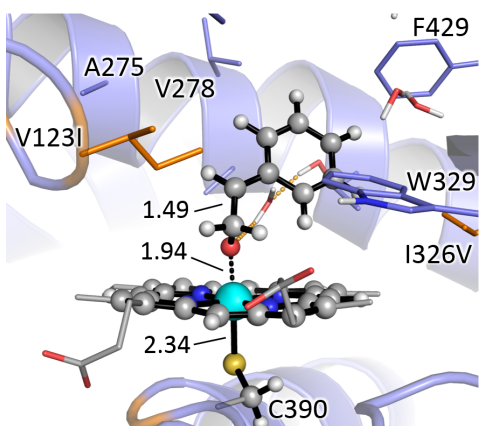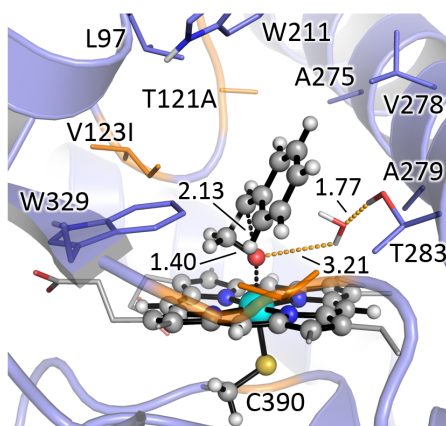

$$q(\text{Ph}) = 0.11$$

$$q(\text{C}2) = -0.11$$

$$q(\text{C}1) = -0.05$$

$$q(\text{O}) = -0.40$$

$$\rho(\text{Ph}) = 0.18$$

$$\rho(\text{C}2) = 0.54$$

$$\rho(\text{C}1) = 0.00$$

$$\rho(\text{O}) = -0.07$$

**aMOx-TS2<sup>d</sup>**  
 $\Delta G^\ddagger = 3.6$  ( $\Delta E^\ddagger = 2.4$ )

$$\angle\text{O-C1-C2-C(Ph)} = -80.4^\circ$$

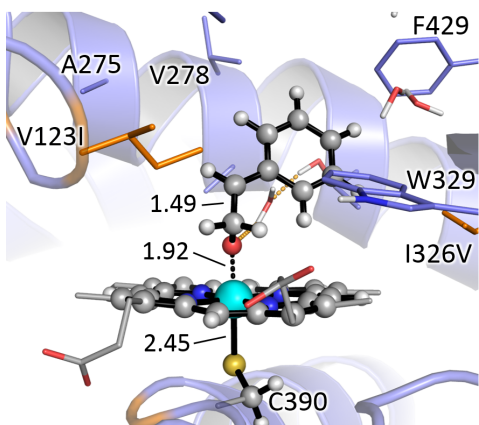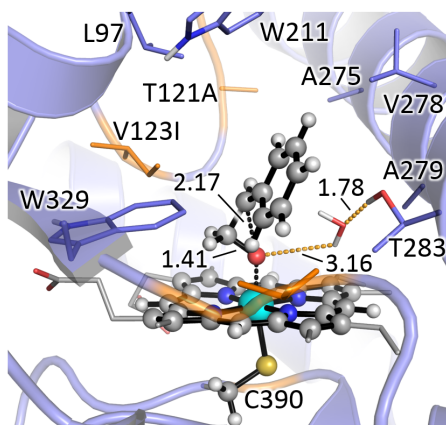

$$q(\text{Ph}) = 0.23$$

$$q(\text{C}2) = -0.06$$

$$q(\text{C}1) = -0.05$$

$$q(\text{O}) = -0.42$$

$$\rho(\text{Ph}) = -0.02$$

$$\rho(\text{C}2) = -0.06$$

$$\rho(\text{C}1) = 0.01$$

$$\rho(\text{O}) = 0.04$$

**aMOx-TS2<sup>a</sup>**  
 $\Delta G^\ddagger = 2.9$  ( $\Delta E^\ddagger = 2.7$ )

$$\angle\text{O-C1-C2-C(Ph)} = -77.7^\circ$$

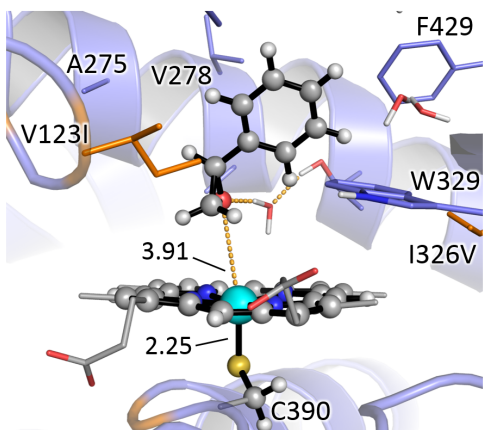

View 1

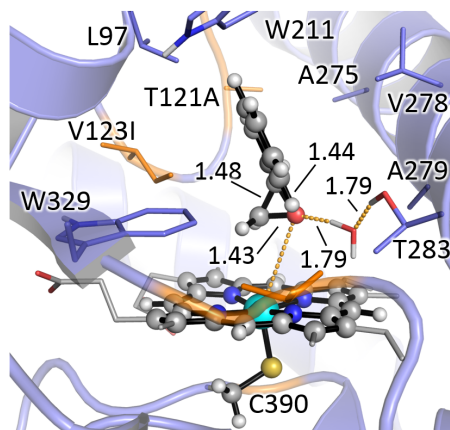

View 2

aMOx-2-R<sup>d</sup>

$$\Delta G_r = -26.6 \text{ (}\Delta E_r = -28.0\text{)}$$

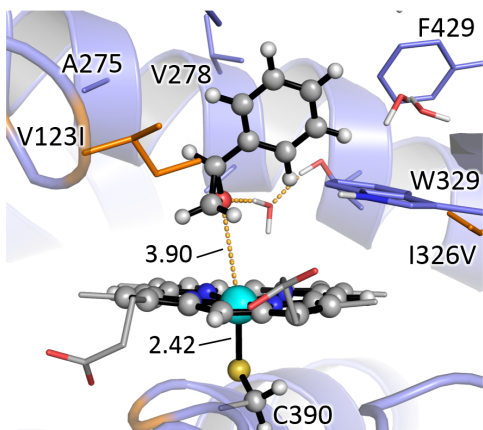

View 1

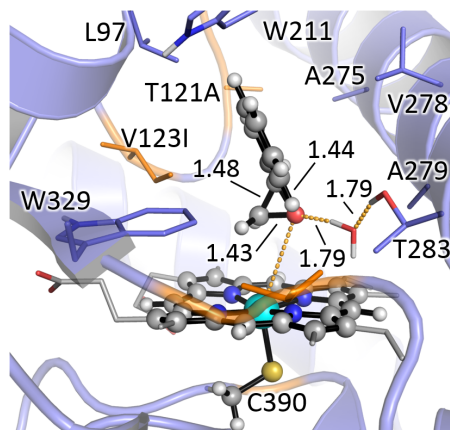

View 2

aMOx-2-R<sup>a</sup>

$$\Delta G_r = -29.5 \text{ (}\Delta E_r = -30.1\text{)}$$

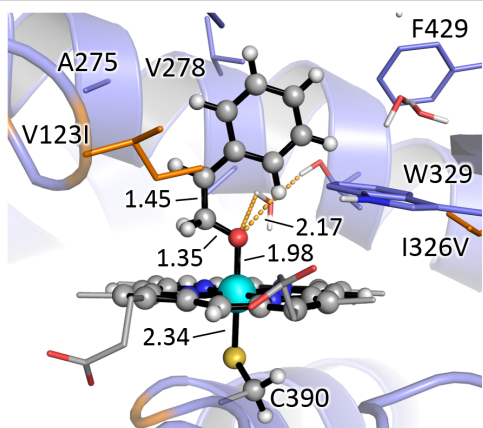

View 1

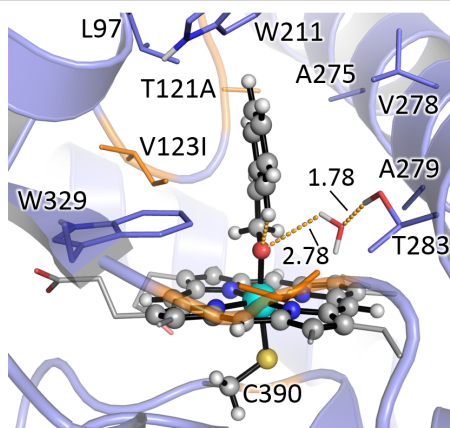

View 2

aMOx-Int2<sup>d</sup>

$$\Delta \Delta G = -6.0 \text{ (}\Delta \Delta E = -6.3\text{)}$$

$$\begin{aligned} q(\text{Ph}) &= 0.24 \\ q(\text{C}2) &= -0.12 \\ q(\text{C}1) &= 0.05 \\ q(\text{O}) &= -0.52 \end{aligned}$$

$$\begin{aligned} \rho(\text{Ph}) &= 0.03 \\ \rho(\text{C}2) &= 0.06 \\ \rho(\text{C}1) &= 0.00 \\ \rho(\text{O}) &= -0.02 \end{aligned}$$

$$\angle \text{O-C1-C2-C(Ph)} = -1.1^\circ$$

$$\angle \text{H-C1-C2-C(Ph)} = 126.5^\circ$$

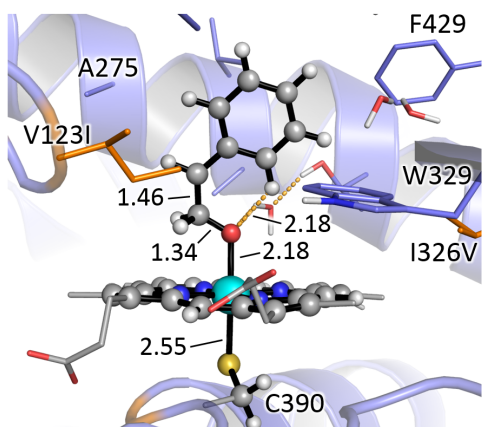

View 1

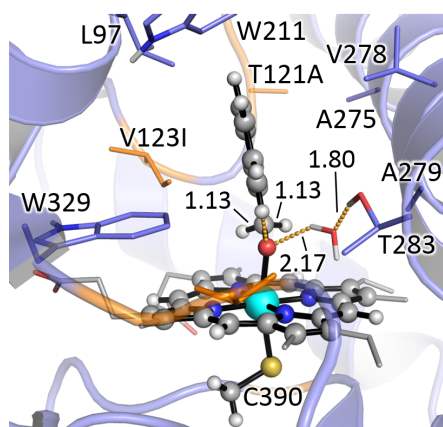

View 2

**aMOx-Int2<sup>q</sup>**  
 $\Delta\Delta G = -3.6$  ( $\Delta\Delta E = -1.5$ )

$q(\text{Ph}) = 0.26$   
 $q(\text{C}2) = -0.10$   
 $q(\text{C}1) = 0.06$   
 $q(\text{O}) = -0.61$   
 $\rho(\text{Ph}) = 0.05$   
 $\rho(\text{C}2) = 0.15$   
 $\rho(\text{C}1) = -0.02$   
 $\rho(\text{O}) = 0.02$   
 $\angle\text{O-C}1\text{-C}2\text{-C}(\text{Ph}) = -1.4^\circ$   
 $\angle\text{H-C}1\text{-C}2\text{-C}(\text{Ph}) = 126.0^\circ$

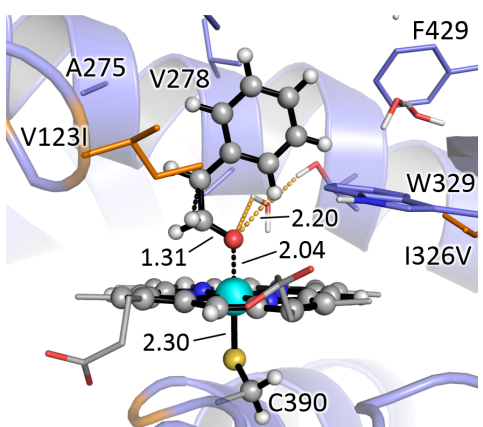

View 1

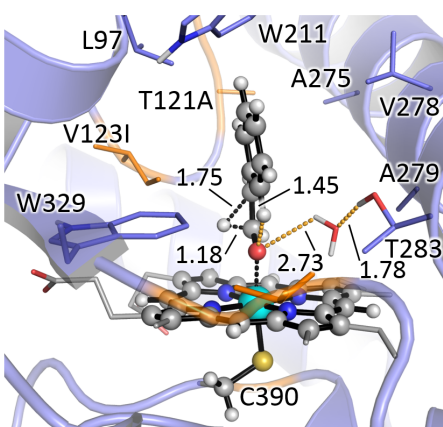

View 2

**aMOx-TS3-cis-si<sup>d</sup>**  
 $\Delta G^\ddagger = -0.1$  ( $\Delta E^\ddagger = -0.6$ )

$\angle\text{H-C}1\text{-C}2\text{-C}(\text{Ph}) = 106.0^\circ$

$q(\text{Ph}) = 0.27$   
 $q(\text{C}2) = -0.13$   
 $q(\text{C}1) = 0.03$   
 $q(\text{O}) = -0.51$   
 $\rho(\text{Ph}) = -0.01$   
 $\rho(\text{C}2) = -0.02$   
 $\rho(\text{C}1) = 0.01$   
 $\rho(\text{O}) = 0.00$

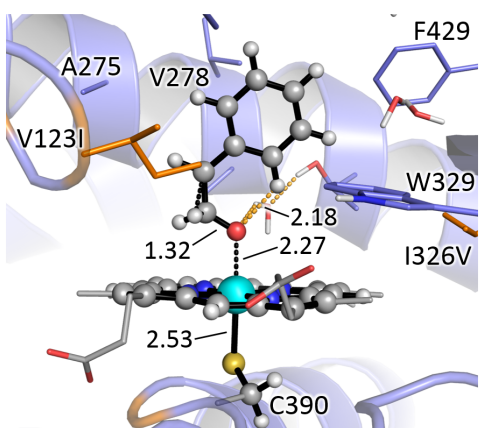

View 1

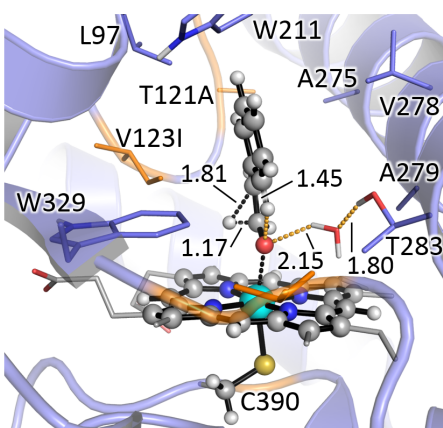

View 2

**aMOx-TS3-cis-si<sup>q</sup>**  
 $\Delta G^\ddagger = -0.2$  ( $\Delta E^\ddagger = 0.1$ )

$\angle\text{H-C}1\text{-C}2\text{-C}(\text{Ph}) = 109.2^\circ$

$q(\text{Ph}) = 0.27$   
 $q(\text{C}2) = -0.09$   
 $q(\text{C}1) = 0.04$   
 $q(\text{O}) = -0.61$   
 $\rho(\text{Ph}) = 0.01$   
 $\rho(\text{C}2) = 0.02$   
 $\rho(\text{C}1) = 0.00$   
 $\rho(\text{O}) = 0.04$

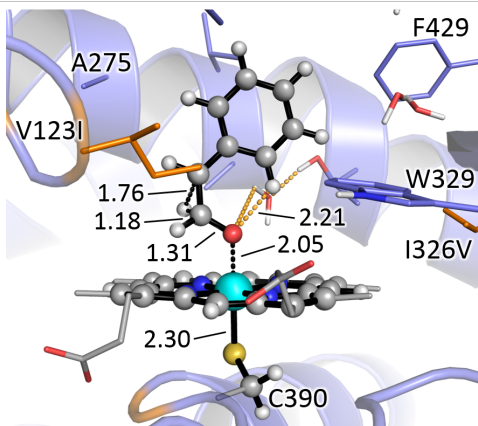

View 1

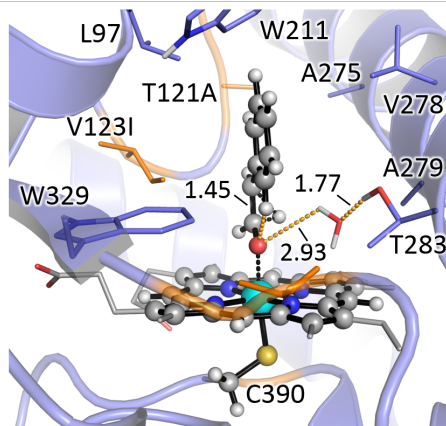

View 2

$$\begin{aligned}
 q(\text{Ph}) &= 0.22 \\
 q(\text{C2}) &= -0.14 \\
 q(\text{C1}) &= 0.08 \\
 q(\text{O}) &= -0.49 \\
 \rho(\text{Ph}) &= -0.01 \\
 \rho(\text{C2}) &= -0.03 \\
 \rho(\text{C1}) &= 0.01 \\
 \rho(\text{O}) &= 0.01
 \end{aligned}$$

**aMOx-TS3-trans-re<sup>d</sup>**  
 $\Delta G^\ddagger = -0.4$  ( $\Delta E^\ddagger = 0.4$ )

$$\angle \text{H-C1-C2-C(Ph)} = -107.6^\circ$$

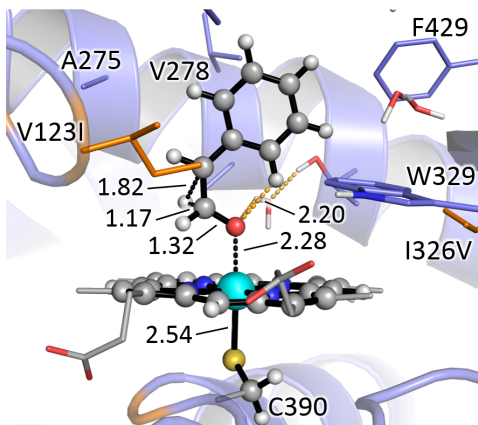

View 1

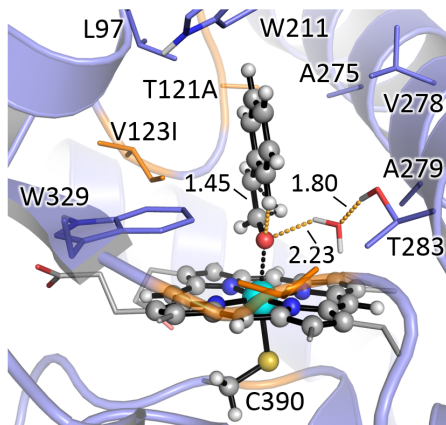

View 2

$$\begin{aligned}
 q(\text{Ph}) &= 0.26 \\
 q(\text{C2}) &= -0.11 \\
 q(\text{C1}) &= 0.08 \\
 q(\text{O}) &= -0.59 \\
 \rho(\text{Ph}) &= 0.00 \\
 \rho(\text{C2}) &= 0.01 \\
 \rho(\text{C1}) &= 0.00 \\
 \rho(\text{O}) &= 0.05
 \end{aligned}$$

**aMOx-TS3-trans-re<sup>a</sup>**  
 $\Delta G^\ddagger = -0.8$  ( $\Delta E^\ddagger = -0.2$ )

$$\angle \text{H-C1-C2-C(Ph)} = -111.1^\circ$$

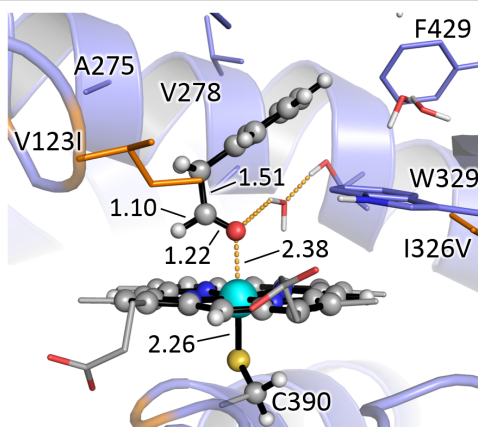

View 1

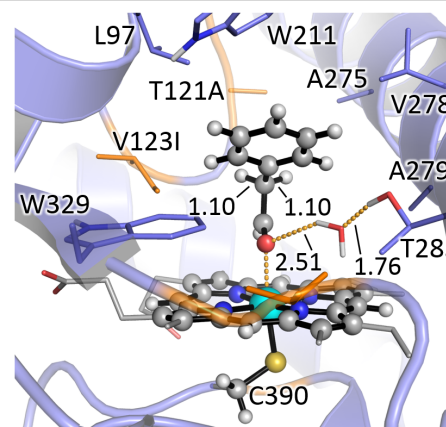

View 2

**aMOx-3<sup>d</sup>**  
 $\Delta G_r = -50.6$  ( $\Delta E_r = -50.3$ )

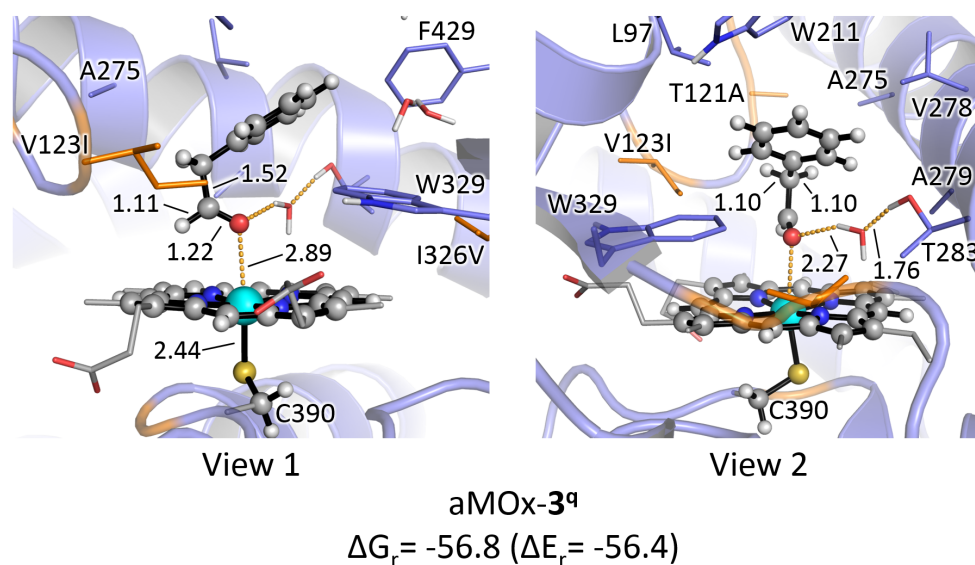

QM/MM calculations were also carried out considering a near attack conformation of styrene exposing the *re* face to the iron-oxo species (see **Figure S11**). This corresponds to the minor, less favorable, catalytically relevant binding mode of styrene characterized from restrained-MD simulations, which would lead to the minor *R*-epoxide as a side product.

QM/MM calculations showed that the substrate is not well stabilized by aMOx active site residues in this *si* face relative binding pose. During the optimization procedure, starting from a NAC conformation in which styrene is close to the iron-oxo, styrene is displaced far from the iron-oxo active species (**Figure S13-B**). The rate-limiting C1–O bond formation **TS1** was also calculated, becoming highly disfavored (activation barriers,  $\Delta G^\ddagger$ , higher than ca. 25 kcal·mol<sup>-1</sup> for both electronic states). Calculated activation barriers are much higher than the equivalent ones calculated for the preferential styrene NAC binding mode (*re* face oriented, **Figure S19**). These QM/MM results are in line with the preferential *re* face oriented catalytically relevant binding mode of styrene in aMOx active site, characterized by substrate-restrained MD simulations (see **Figure S11**). Due to active site shape, styrene *re* face binding modes are much more stable than *si* face ones, which are much less reactive.

Therefore, QM/MM calculations together with MD simulations carried out suggest that reactivity of styrene through *si* face binding modes in aMOx active site is highly disfavored and not expected.

**Figure S24:** QM/MM optimized structures corresponding to the lowest in energy calculated reaction pathways in **A) P450<sub>LA1</sub>** and **B) aMOx**. See **Figures S15** and **S19** for a complete description of the calculated mechanisms. Energy values are given in kcal·mol<sup>-1</sup>.

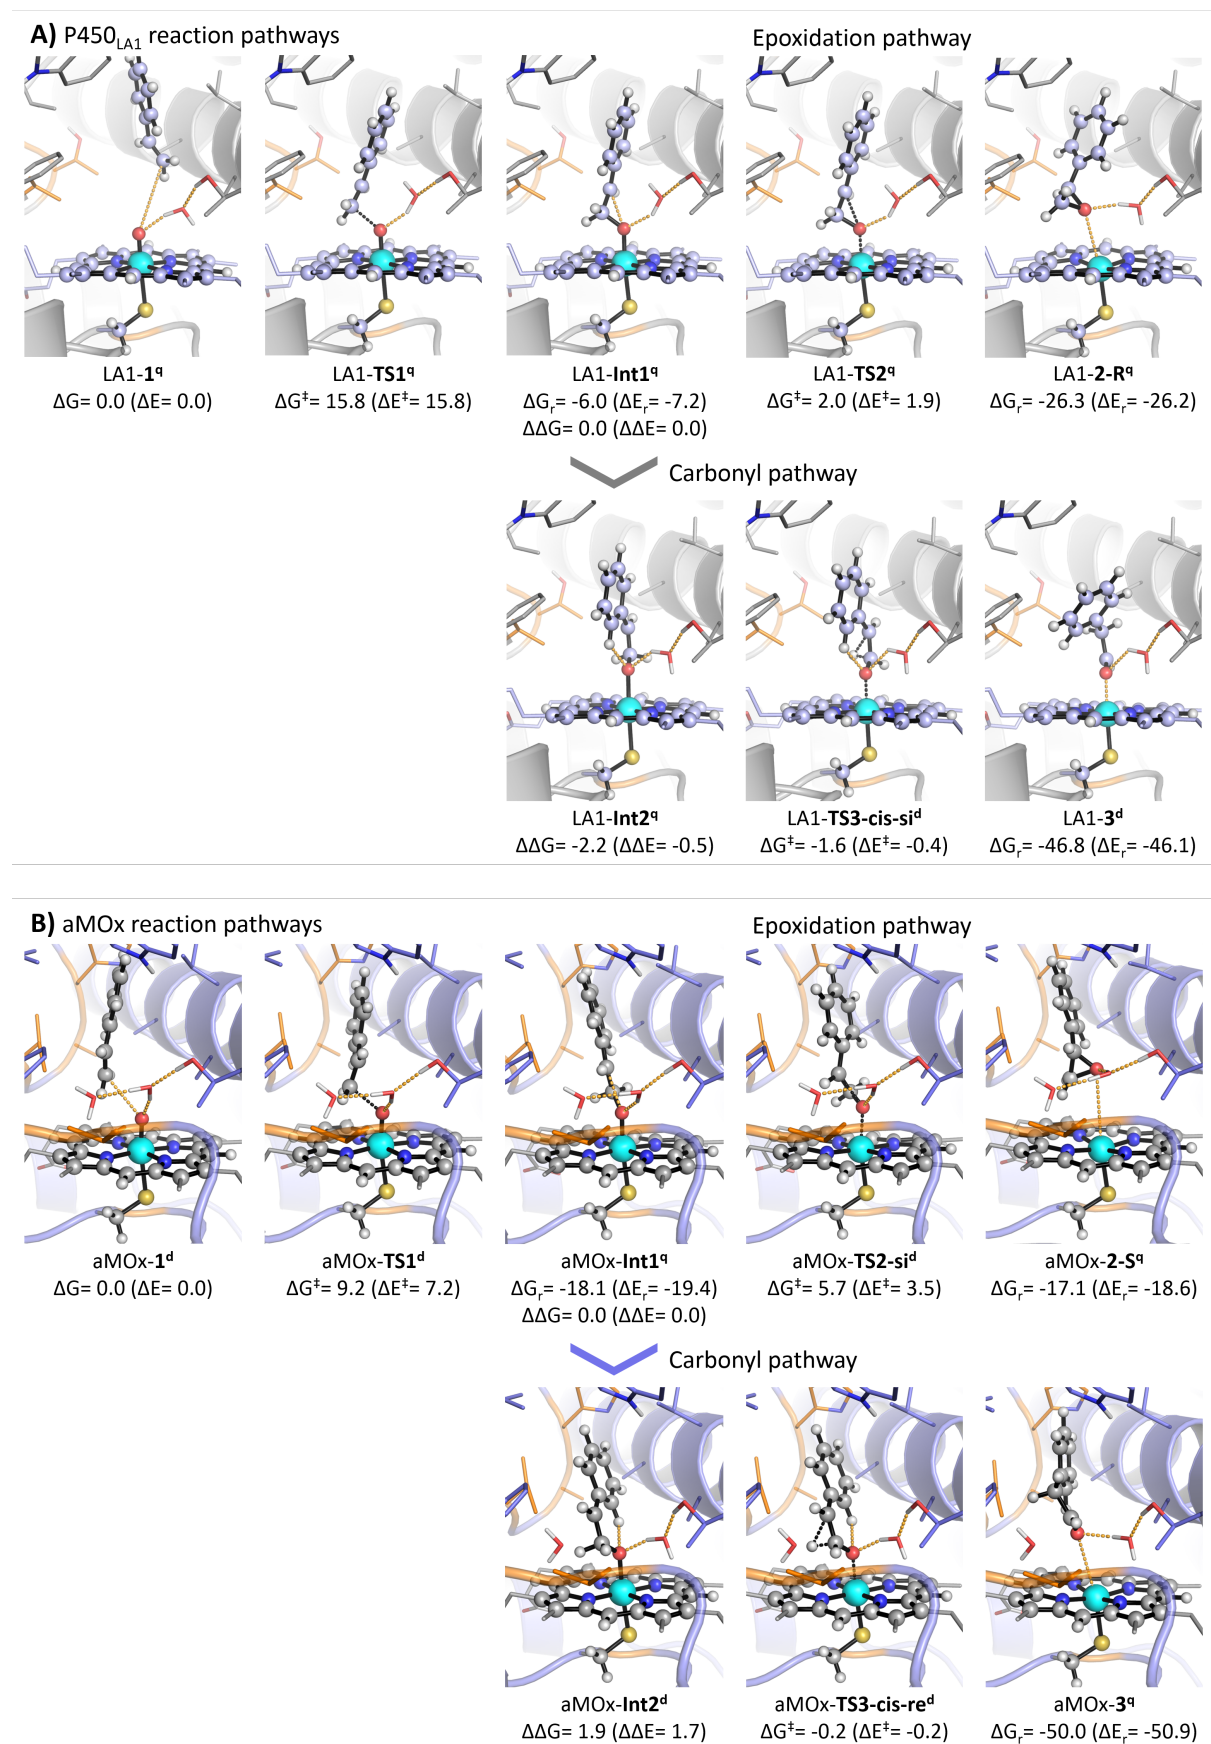



**Table S2:** Predicted lifetimes for the reactive radical intermediate from the enzyme-free DFT truncated model and QM/MM calculations, based on the Transition State Theory model. For comparison, the lifetimes of the radical intermediates estimated from QCT simulations are also reported. The equations used to obtain the statistic intermediate lifetime are also given.

| DFT free-enzyme model                                                                                               | Energy barrier ( $\Delta G^\ddagger$ )  | Predicted lifetime (fs)                  |
|---------------------------------------------------------------------------------------------------------------------|-----------------------------------------|------------------------------------------|
| Int1 <sup>q</sup> to TS2 <sup>q</sup>                                                                               | 2.7                                     | $1.1 \cdot 10^4$                         |
| Int1 <sup>q</sup> to TS-rotation <sup>q</sup>                                                                       | 2.0                                     | $3.3 \cdot 10^3$                         |
| QM/MM calculations                                                                                                  | Energy barrier ( $\Delta G^\ddagger$ )  | Predicted lifetime (fs)                  |
| LA1-Int1 <sup>q</sup> to LA1-TS2 <sup>q</sup>                                                                       | 2.0                                     | $3.3 \cdot 10^3$                         |
| aMOx-Int1 <sup>q</sup> to aMOx-TS2 <sup>q</sup>                                                                     | 10.7                                    | $7.8 \cdot 10^9$                         |
| aMOx-Int1 <sup>q</sup> to aMOx-TS-rotation <sup>q</sup>                                                             | 7.2                                     | $2.1 \cdot 10^7$                         |
| aMOx-Int1 <sup>d</sup> to aMOx-TS2 <sup>d</sup> *                                                                   | 5.7 (9.7 from aMOx-Int1 <sup>q</sup> )  | $1.7 \cdot 10^6$ ( $1.4 \cdot 10^9$ )    |
| aMOx-Int1 <sup>d</sup> to aMOx-TS-rotation <sup>d</sup> *                                                           | 8.1 (12.1 from aMOx-Int1 <sup>q</sup> ) | $9.7 \cdot 10^7$ ( $8.3 \cdot 10^{10}$ ) |
| * Higher in energy pathway. aMOx-Int <sup>d</sup> is 4.0 kcal·mol <sup>-1</sup> higher than aMOx-Int <sup>q</sup> . |                                         |                                          |
| QCT simulations                                                                                                     | Estimated lifetime (fs)                 |                                          |
| 15 trajectories (d)                                                                                                 | $9.2 \cdot 10^1$                        |                                          |
| 11 trajectories (q)                                                                                                 | $2.7 \cdot 10^2$                        |                                          |

$$t_{1/2} = \frac{\ln(2)}{k} \quad (1)$$

Where:

$t_{1/2}$  stands for the half-life time of a first order reaction,  
and  $k$  is the TST rate constant (as defined in eq. 2):

$$k = \frac{k_B T}{h} e^{-\Delta G^\ddagger / RT} \quad (2)$$

Where:

$k_B$  is the Boltzmann constant ( $1.380649 \cdot 10^{-23}$  J·K<sup>-1</sup>·mol<sup>-1</sup>),  
T is the temperature at 298.15 K,  
h is the Plank constant ( $6.62607015 \cdot 10^{-34}$  J·s),  
 $\Delta G^\ddagger$  is the computed free energy barrier in kcal·mol<sup>-1</sup>, and  
R is the ideal gas constant ( $1.987204259 \cdot 10^{-3}$  kcal·K<sup>-1</sup>·mol<sup>-1</sup>).

Intermediate lifetime obtained from QCT simulations are calculated as the average value of the timegap measured between the formation of the first C1-O bond and the second C2-O bond in reactive, epoxide forming, QCT trajectories.

Nonstatistical intermediates and non-IRC reaction pathways are well established for a variety of organic reactions,<sup>53-56</sup> especially those involving post-transition state bifurcations.<sup>57,58</sup> However, they are still relatively unexplored in organometallic reactions.<sup>59-66</sup> Recent contributions in this field by Ess and coworkers<sup>67</sup> have highlighted the necessity to use direct dynamics trajectory QCT simulations to consider atomic motion in organometallic reactions involving shallow intermediates, to properly understand organometallic reaction mechanisms and selectivities. Nevertheless, and because the nonstatistical dynamic effects on organometallic intermediates and their potential evolution toward non-IRC pathways are highly system dependent (shape of the PES, weight of the atoms involved, geometric requirements, energy acquired by the intermediate when it is formed, etc.), it is not trivial and very challenging to propose a set of rules that allow us to predict, a priori, when these dynamic effects will determine the selectivity or the reaction mechanism. Further work in this direction is still required.

## VI. Local Electric Field characterization in the active site cavity and its impact on the reactive intermediates

**Figure S25:** Estimation of the Local Electric Field (LEF) generated in enzyme active sites. The LEF in wildtype P450<sub>LA1</sub> and aMOx variant were calculated using TITAN 2.0, and using the QM/MM optimized key radical intermediates (**Int1<sup>a</sup>**) (find more details in the Computational Methods section).

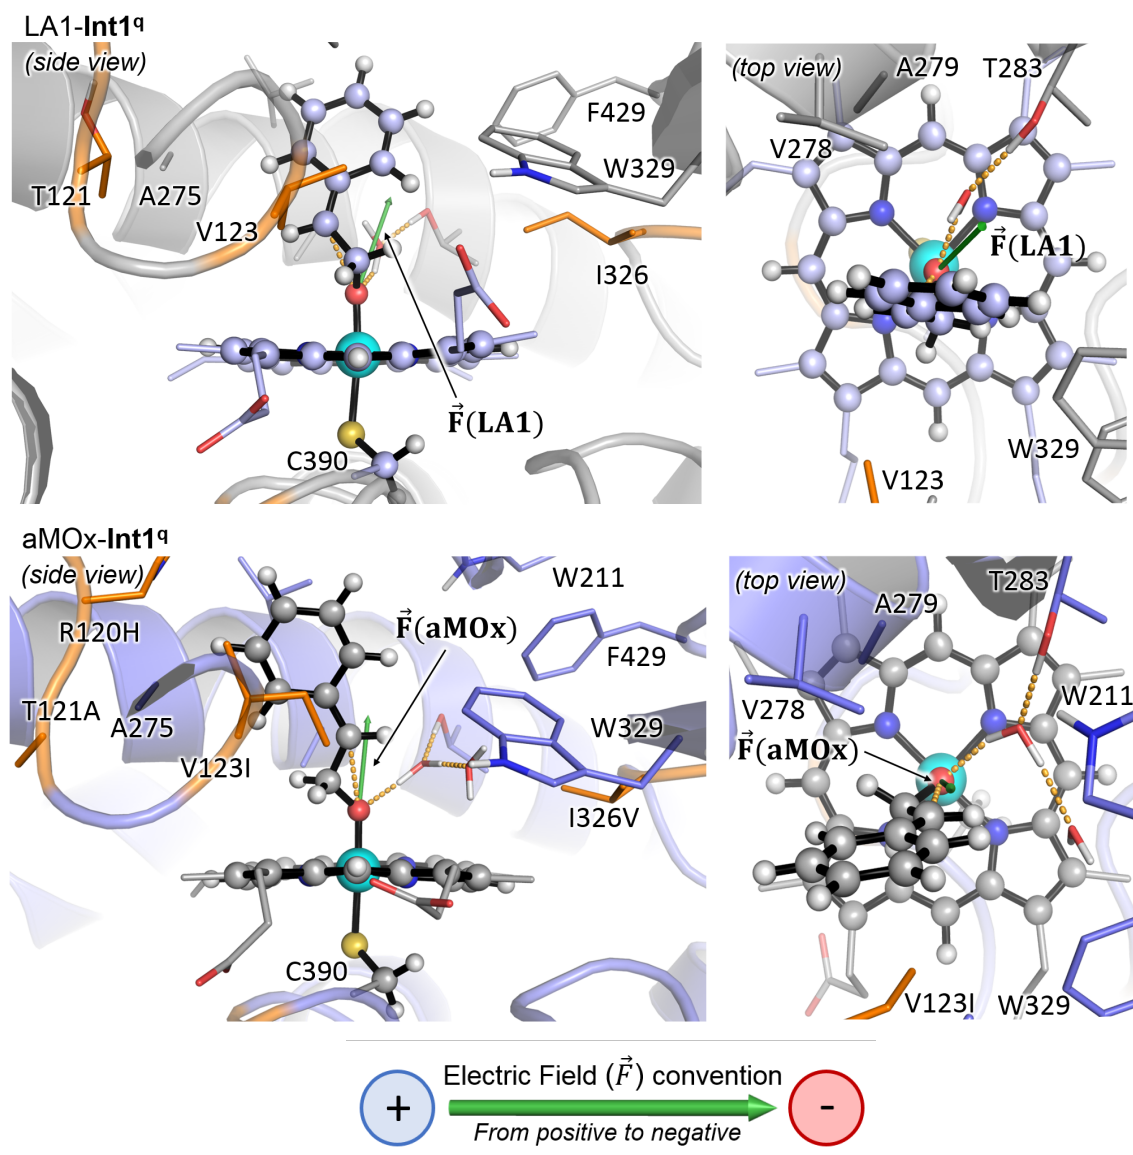

|                 | Electric field components (a.u.) |         |          |
|-----------------|----------------------------------|---------|----------|
|                 | $F_x$                            | $F_y$   | $F_z$    |
| $\vec{F}(LA1)$  | 0.00090                          | 0.00470 | 0.00040  |
| $\vec{F}(aMOx)$ | -0.00020                         | 0.00420 | -0.00030 |

The electric field convention used is that the direction of the field is from positive to negative (i.e. a free positive charge will follow the direction of the electric vector). This is the general convention despite Gaussian package uses the opposite (i.e. negative to positive).

Interestingly, calculations showed that the local electric field (LEF) generated in the active sites of wildtype P450<sub>LA1</sub> ( $\vec{F}(LA1)$ ) and aMOx variant ( $\vec{F}(aMOx)$ ) are very similar, and almost equivalent, in both direction and strength.

P450<sub>LA1</sub>  $\vec{F}(LA1)$  exhibits a large projection along the Fe-O bond despite the local electric field is not completely perpendicular to the heme cofactor. On the other hand, the local electric field generated in aMOx active site ( $\vec{F}(aMOx)$ ) is almost perpendicular to the heme (see top view representations) and has a similar strength as the one generated in P450<sub>LA1</sub>. In both cases, the LEF follows the Fe to O direction. Therefore, these calculations showed that evolution did not significantly altered the LEF exerted by the protein scaffold.

The direction of the LEF in the active site of these enzymes is relevant because it stabilizes the formation of the carbocation intermediate (see **Figures S26 to S29**).

These results support the conclusion that the preexisting electrostatic preorganization of the wildtype P450<sub>LA1</sub> active site favors the formation of the carbocation intermediate. This electrostatic preorganization is required, together with the strong conformational control achieved by the aMOx variant active site upon evolution, to direct the reaction toward the carbonyl formation pathway.

**Figure S26:** Impact of the local electric field characterized in aMOx active site (**Figure S25**) on stabilization of key intermediates.

**A)** DFT optimized quartet radical intermediate (**Int1<sup>q</sup>**) and doublet and quartet carbocation intermediates (**Int2<sup>d</sup>** and **Int2<sup>q</sup>**) in the absence and in the presence of an oriented electric field (EF) in terms of electronic energy ( $\Delta E$ ), enthalpy ( $\Delta H$ ), and quasi-harmonic corrected Gibbs energy ( $\Delta G$ ). Energy values were obtained at the (U)B3LYP/Def2TZVP/PCM (dichloromethane)//(U)B3LYP/631G(d)+SDD(Fe)/PCM (dichloromethane) level. Radical intermediate **Int1<sup>q</sup>** in the absence of EF was used as energy reference. An EF strength equivalent to the one generated by the aMOx active site ( $\vec{F}(aMOx) = (F_x, F_y, F_z) = (-0.00020, 0.00420, -0.00030)$  a.u., **Figure S25**) has been used in the calculations.

**B)** Optimized geometries for the stationary points reported in **A**). Mulliken charges ( $q$ ) and spin densities ( $\rho$ ) for the phenyl group (sum of all C and H atoms), C2 benzylic position, C1, O and Fe are reported.

Distances, energies and Mulliken charges and spin density values are given in Å, kcal·mol<sup>-1</sup> and a.u., respectively.

**A)**

| Structure               | Electronic State | Electric Field  | $\Delta\Delta E$ | $\Delta\Delta H$ | $\Delta\Delta G$ |
|-------------------------|------------------|-----------------|------------------|------------------|------------------|
| <b>Int1<sup>a</sup></b> | quartet (q)      | No field        | 0.0              | 0.0              | 0.0              |
| <b>Int2<sup>a</sup></b> | doublet (d)      | No field        | -4.2             | -4.7             | -3.8             |
|                         | quartet (q)      | No field        | 3.7              | 2.6              | 0.8              |
| <b>Int1-EF</b>          | quartet (q)      | $\vec{F}(aMOx)$ | -6.9             | -6.9             | -7.0             |
| <b>Int2-EF</b>          | doublet (d)      | $\vec{F}(aMOx)$ | -25.2            | -25.7            | -24.8            |
|                         | quartet (q)      | $\vec{F}(aMOx)$ | -19.1            | -20.2            | -21.9            |

<sup>a</sup> From **Figure S1**

**B)**

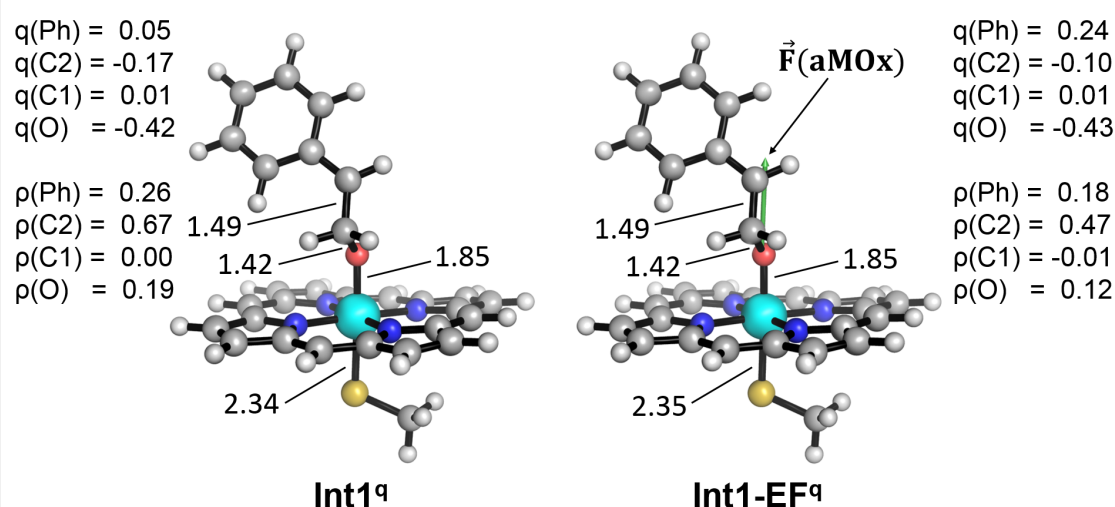



**Figure S27:** Impact of the local electric field characterized in aMOx active site (**Figure S25**) on stabilization of key intermediates, without considering polarization by implicit solvent model.

**A)** DFT optimized quartet radical intermediate (**Int1<sup>q</sup>**) and doublet and quartet carbocation intermediates (**Int2<sup>d</sup>** and **Int2<sup>q</sup>**) in gas phase (no implicit solvent model) and in the presence of an oriented electric field (EF) in terms of electronic energy ( $\Delta E$ ), enthalpy ( $\Delta H$ ), and quasi-harmonic corrected Gibbs energy ( $\Delta G$ ). Energy values were obtained at the (U)B3LYP/Def2TZVP//((U)B3LYP/6-31G(d)+SDD(Fe) level. Radical intermediate **Int1<sup>q</sup>** optimized in the gas phase and in the absence of EF was used as energy reference. An EF strength equivalent to the one generated by the aMOx active site ( $\vec{F}(aMOx) = (F_x, F_y, F_z) = (-0.00020, 0.0420, -0.00030)$  a.u., **Figure S25**) has been used in the calculations.

**B)** Optimized geometries for the stationary points reported in **A**). Mulliken charges ( $q$ ) and spin densities ( $\rho$ ) for the phenyl group (sum of all C and H atoms), C2 benzylic position, C1, O and Fe are reported.

Distances, energies and Mulliken charges and spin density values are given in Å, kcal·mol<sup>-1</sup> and a.u., respectively.

**A)**

| Structure                  | Electronic State | Electric Field  | $\Delta\Delta E$ | $\Delta\Delta H$ | $\Delta\Delta G$ |
|----------------------------|------------------|-----------------|------------------|------------------|------------------|
| <b>Int1</b> (gas phase)    | quartet (q)      | No field        | 0.0              | 0.0              | 0.0              |
| <b>Int2</b> (gas phase)    | doublet (d)      | No field        | 0.6              | -0.5             | 0.2              |
| <b>Int1-EF</b> (gas phase) | quartet (q)      | $\vec{F}(aMOx)$ | -3.3             | -3.3             | -3.3             |
| <b>Int2-EF</b> (gas phase) | doublet (d)      | $\vec{F}(aMOx)$ | -12.6            | -13.7            | -13.0            |
|                            | quartet (q)      | $\vec{F}(aMOx)$ | 0.6              | -0.6             | -3.6             |

**B)**

q(Ph) = 0.04  
q(C2) = -0.14  
q(C1) = 0.01  
q(O) = -0.38

$\rho$ (Ph) = 0.27  
 $\rho$ (C2) = 0.71  
 $\rho$ (C1) = -0.03  
 $\rho$ (O) = 0.22

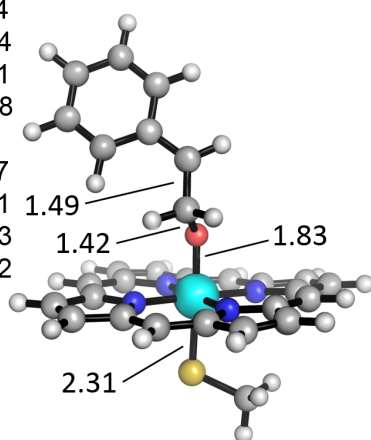

**Int1<sup>q</sup>** (gas phase)

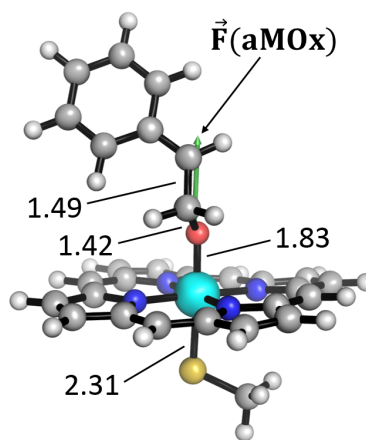

**Int1-EF<sup>q</sup>** (gas phase)

q(Ph) = 0.11  
q(C2) = -0.12  
q(C1) = 0.00  
q(O) = -0.37

$\rho$ (Ph) = 0.25  
 $\rho$ (C2) = 0.65  
 $\rho$ (C1) = -0.02  
 $\rho$ (O) = 0.21

$q(\text{Ph}) = 0.27$   
 $q(\text{C2}) = -0.11$   
 $q(\text{C1}) = 0.07$   
 $q(\text{O}) = -0.50$

$\rho(\text{Ph}) = -0.09$   
 $\rho(\text{C2}) = -0.23$   
 $\rho(\text{C1}) = 0.01$   
 $\rho(\text{O}) = 0.10$

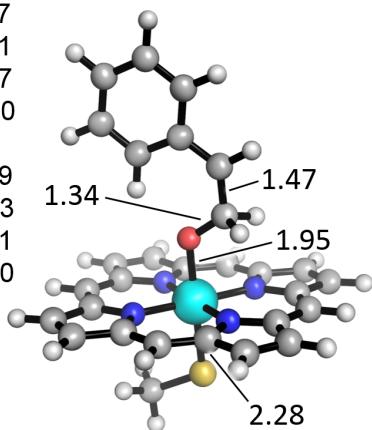

**Int2<sup>d</sup> (gas phase)**

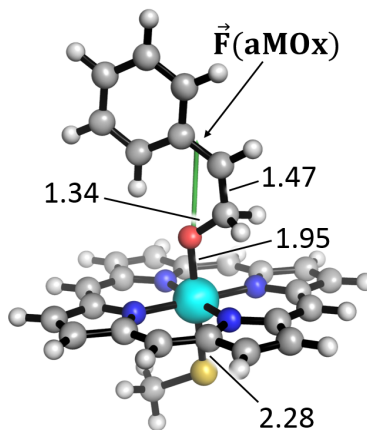

**Int2-EF<sup>d</sup> (gas phase)**

$q(\text{Ph}) = 0.41$   
 $q(\text{C2}) = -0.07$   
 $q(\text{C1}) = 0.06$   
 $q(\text{O}) = -0.52$

$\rho(\text{Ph}) = 0.00$   
 $\rho(\text{C2}) = -0.01$   
 $\rho(\text{C1}) = 0.00$   
 $\rho(\text{O}) = 0.02$

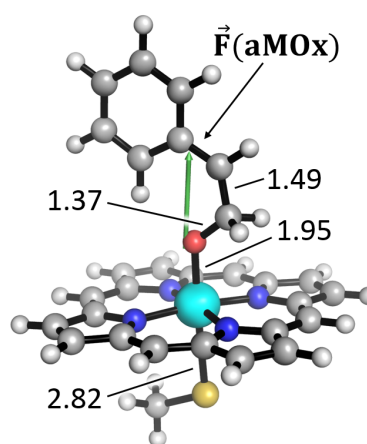

**Int2-EF<sup>q</sup> (gas phase)**

$q(\text{Ph}) = 0.31$   
 $q(\text{C2}) = -0.09$   
 $q(\text{C1}) = 0.06$   
 $q(\text{O}) = -0.55$

$\rho(\text{Ph}) = -0.10$   
 $\rho(\text{C2}) = -0.27$   
 $\rho(\text{C1}) = 0.02$   
 $\rho(\text{O}) = 0.22$



**Figure S28:** Study of the impact of the local electric field strength on the stabilization of key intermediates.

**A)** Electric field components (in a.u.) of different electric fields with the same orientation and direction than  $\vec{F}(aMOx)$ , but with different intensities that have been used.

**Calculations considering polarization from implicit solvent model:**

**B)** Single point calculations at the (U)B3LYP/Def2TZVP/PCM(dichloromethane) level in the presence of oriented electric fields as described in **A)**. The DFT optimized structures of the radical and carbocation intermediates in the absence of electric field have been used, respectively.  $\Delta\Delta E$  electronic energies are given in kcal·mol<sup>-1</sup>. Radical intermediate **Int1<sup>q</sup>** in the absence of EF was used as energy reference.

**C)** Mulliken charges and spin density values (in a.u.) obtained from **Int1<sup>q</sup>** single point calculations with the different electric fields studied. A figure showing the orientation and direction of the applied electric fields is also shown.

**D)** Mulliken charges and spin density values (in a.u.) obtained from **Int2<sup>d</sup>** single point calculations with the different electric fields studied. A figure showing the orientation and direction of the applied electric fields is also shown.

**E)** Mulliken charges and spin density values (in a.u.) obtained from **Int2<sup>q</sup>** single point calculations with the different electric fields studied. A figure showing the orientation and direction of the applied electric fields is also shown.

**Gas phase calculations:**

**F)** Single point calculations at the (U)B3LYP/Def2TZVP level (gas phase) in the presence of oriented electric fields as described in **A)**. The DFT optimized structures of the radical and carbocation intermediates in the gas phase and in the absence of electric field have been used, respectively.  $\Delta\Delta E$  electronic energies are given in kcal·mol<sup>-1</sup>. Radical intermediate **Int1<sup>q</sup>** (gas phase) in the absence of EF was used as energy reference.

**G)** Mulliken charges and spin density values (in a.u.) obtained from **Int1<sup>q</sup>** (gas phase) single point calculations with the different electric fields studied. A figure showing the orientation and direction of the applied electric fields is also shown.

**H)** Mulliken charges and spin density values (in a.u.) obtained from **Int2<sup>d</sup>** (gas phase) single point calculations with the different electric fields studied. A figure showing the orientation and direction of the applied electric fields is also shown.

A)

| Electric field intensity    | Electric field components (a.u.) |          |          |
|-----------------------------|----------------------------------|----------|----------|
|                             | $F_x$                            | $F_y$    | $F_z$    |
| $\vec{F}(aMOx) \times 2$    | -0.00040                         | 0.00840  | -0.00060 |
| $\vec{F}(aMOx) \times 1$    | -0.00020                         | 0.00420  | -0.00030 |
| $\vec{F}(aMOx) \times 0.5$  | -0.00010                         | 0.00210  | -0.00015 |
| No field                    | 0.00000                          | 0.00000  | 0.00000  |
| $-\vec{F}(aMOx) \times 0.5$ | 0.00010                          | -0.00210 | 0.00015  |
| $-\vec{F}(aMOx) \times 1$   | 0.00020                          | -0.00420 | 0.00030  |
| $-\vec{F}(aMOx) \times 2$   | 0.00040                          | -0.00840 | 0.00060  |

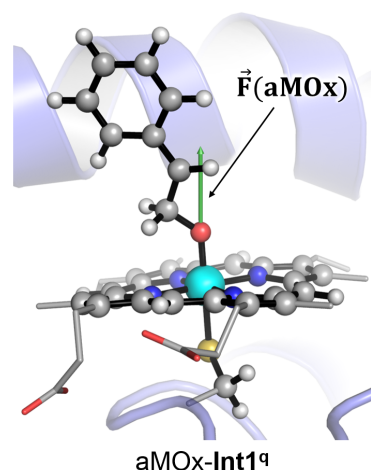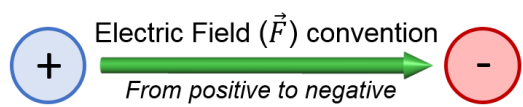

The electric field convention is that the direction of the field is from positive to negative (i.e. a free positive charge will follow the direction of the electric vector). This is the general convention despite Gaussian package uses the opposite (i.e. negative to positive).

**Calculations considering polarization from implicit solvent model:**

B)

| Electric field intensity    | $\Delta\Delta E$ (kcal·mol <sup>-1</sup> ) |                   |                   |
|-----------------------------|--------------------------------------------|-------------------|-------------------|
|                             | Int1 <sup>a</sup>                          | Int2 <sup>d</sup> | Int2 <sup>a</sup> |
| $\vec{F}(aMOx) \times 2$    | -31.2                                      | -52.7             | -48.5             |
| $\vec{F}(aMOx) \times 1$    | -6.8                                       | -25.0             | -19.0             |
| $\vec{F}(aMOx) \times 0.5$  | -1.9                                       | -13.7             | -6.8              |
| No field                    | 0.0                                        | -4.2              | 3.7               |
| $-\vec{F}(aMOx) \times 0.5$ | -0.2                                       | 3.5               | 12.2              |
| $-\vec{F}(aMOx) \times 1$   | -2.2                                       | 14.8              | 7.6               |
| $-\vec{F}(aMOx) \times 2$   | -12.6                                      | -11.6             | 2.9               |

Values highlighted in gray indicate a change in the electronic configuration as compared to the electronic configuration in the absence of electric field. For example: a radical configuration when a carbocation structure is expected.

c)

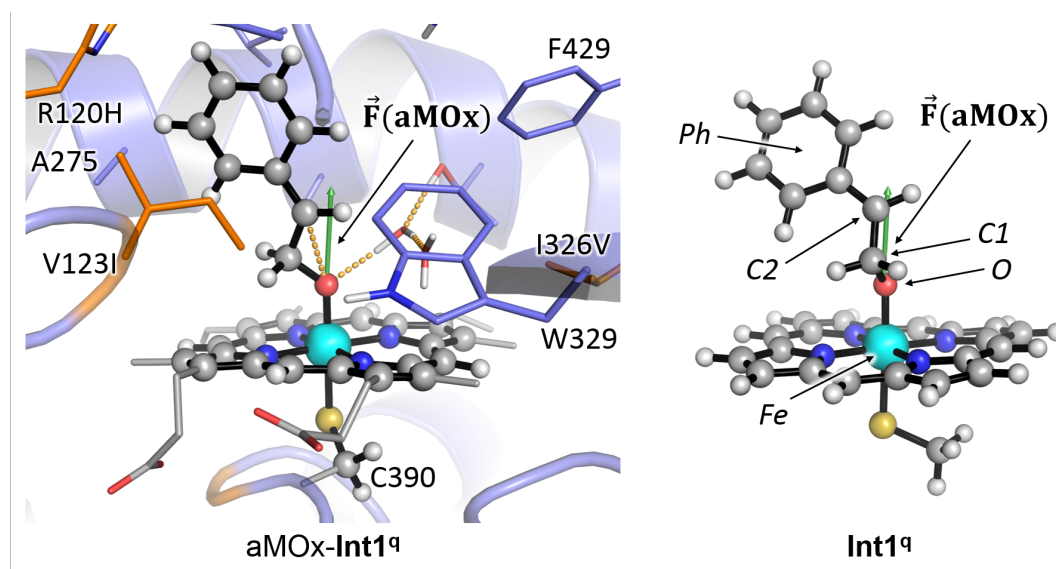

| Electric field intensity    | Int1 <sup>q</sup> Mulliken Charges (q) |       |      |       |       |
|-----------------------------|----------------------------------------|-------|------|-------|-------|
|                             | Ph                                     | C2    | C1   | O     | Fe    |
| $\vec{F}(aMOx) \times 2$    | 0.54                                   | 0.00  | 0.01 | -0.48 | -0.03 |
| $\vec{F}(aMOx) \times 1$    | 0.24                                   | -0.11 | 0.01 | -0.42 | -0.14 |
| $\vec{F}(aMOx) \times 0.5$  | 0.10                                   | -0.15 | 0.01 | -0.41 | -0.18 |
| No field                    | 0.05                                   | -0.17 | 0.01 | -0.42 | -0.20 |
| $-\vec{F}(aMOx) \times 0.5$ | 0.01                                   | -0.17 | 0.02 | -0.43 | -0.21 |
| $-\vec{F}(aMOx) \times 1$   | -0.01                                  | -0.18 | 0.02 | -0.45 | -0.22 |
| $-\vec{F}(aMOx) \times 2$   | -0.08                                  | -0.20 | 0.04 | -0.47 | -0.21 |

| Electric field intensity    | Int1 <sup>q</sup> Spin Densities ( $\rho$ ) |      |       |       |      |
|-----------------------------|---------------------------------------------|------|-------|-------|------|
|                             | Ph                                          | C2   | C1    | O     | Fe   |
| $\vec{F}(aMOx) \times 2$    | 0.06                                        | 0.09 | 0.00  | 0.20  | 2.55 |
| $\vec{F}(aMOx) \times 1$    | 0.18                                        | 0.48 | -0.01 | 0.12  | 2.26 |
| $\vec{F}(aMOx) \times 0.5$  | 0.24                                        | 0.66 | -0.01 | 0.17  | 2.06 |
| No field                    | 0.26                                        | 0.67 | 0.00  | -0.19 | 1.99 |
| $-\vec{F}(aMOx) \times 0.5$ | 0.27                                        | 0.67 | 0.00  | 0.19  | 1.97 |
| $-\vec{F}(aMOx) \times 1$   | 0.27                                        | 0.67 | 0.00  | 0.19  | 1.96 |
| $-\vec{F}(aMOx) \times 2$   | 0.28                                        | 0.69 | -0.04 | 0.13  | 1.20 |

Values highlighted in gray indicate a change in the electronic configuration as compared to the electronic configuration in the absence of electric field. For example: a radical configuration when a carbocation structure is expected.

D)

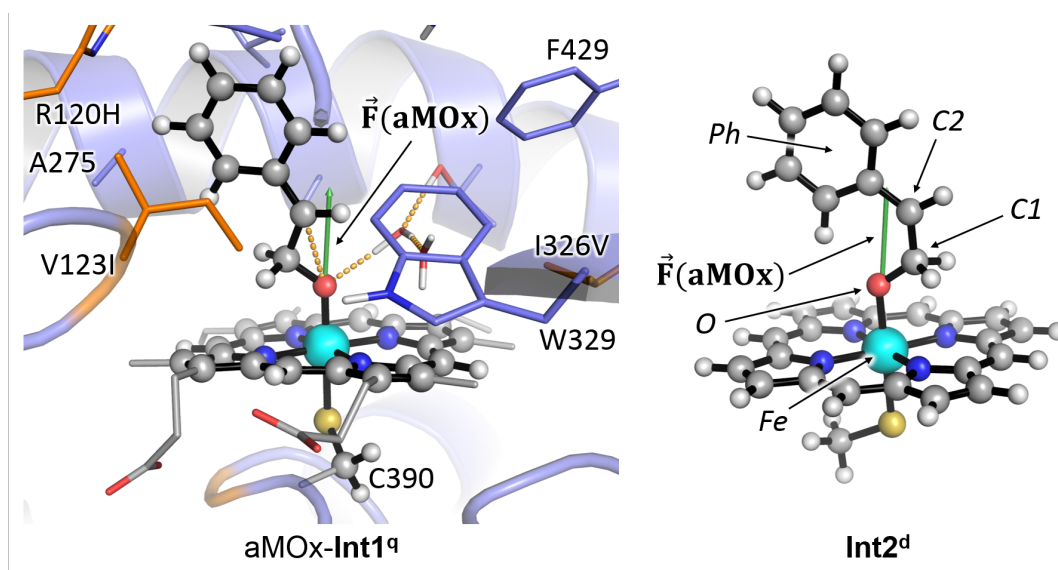

| Electric field intensity    | Int2 <sup>d</sup> Mulliken Charges (q) |       |      |       |       |
|-----------------------------|----------------------------------------|-------|------|-------|-------|
|                             | Ph                                     | C2    | C1   | O     | Fe    |
| $\vec{F}(aMOx) \times 2$    | 0.54                                   | -0.03 | 0.06 | -0.53 | -0.06 |
| $\vec{F}(aMOx) \times 1$    | 0.47                                   | -0.03 | 0.06 | -0.54 | -0.07 |
| $\vec{F}(aMOx) \times 0.5$  | 0.43                                   | -0.04 | 0.06 | -0.54 | -0.08 |
| No field                    | 0.39                                   | -0.05 | 0.06 | -0.54 | -0.08 |
| $-\vec{F}(aMOx) \times 0.5$ | 0.32                                   | -0.07 | 0.06 | -0.53 | -0.09 |
| $-\vec{F}(aMOx) \times 1$   | 0.17                                   | -0.13 | 0.06 | -0.52 | -0.09 |
| $-\vec{F}(aMOx) \times 2$   | -0.18                                  | -0.20 | 0.09 | -0.55 | -0.13 |

| Electric field intensity    | Int2 <sup>d</sup> Spin Densities ( $\rho$ ) |       |       |      |      |
|-----------------------------|---------------------------------------------|-------|-------|------|------|
|                             | Ph                                          | C2    | C1    | O    | Fe   |
| $\vec{F}(aMOx) \times 2$    | 0.00                                        | 0.00  | 0.00  | 0.04 | 1.03 |
| $\vec{F}(aMOx) \times 1$    | 0.00                                        | 0.00  | 0.00  | 0.02 | 1.04 |
| $\vec{F}(aMOx) \times 0.5$  | 0.00                                        | 0.01  | 0.00  | 0.02 | 1.04 |
| No field                    | 0.00                                        | 0.00  | 0.00  | 0.01 | 1.03 |
| $-\vec{F}(aMOx) \times 0.5$ | -0.02                                       | -0.06 | 0.00  | 0.03 | 1.01 |
| $-\vec{F}(aMOx) \times 1$   | 0.02                                        | 0.01  | 0.00  | 0.02 | 1.23 |
| $-\vec{F}(aMOx) \times 2$   | 0.36                                        | 0.57  | -0.04 | 0.05 | 1.09 |

Values highlighted in gray indicate a change in the electronic configuration as compared to the electronic configuration in the absence of electric field. For example: a radical configuration when a carbocation structure is expected.

E)

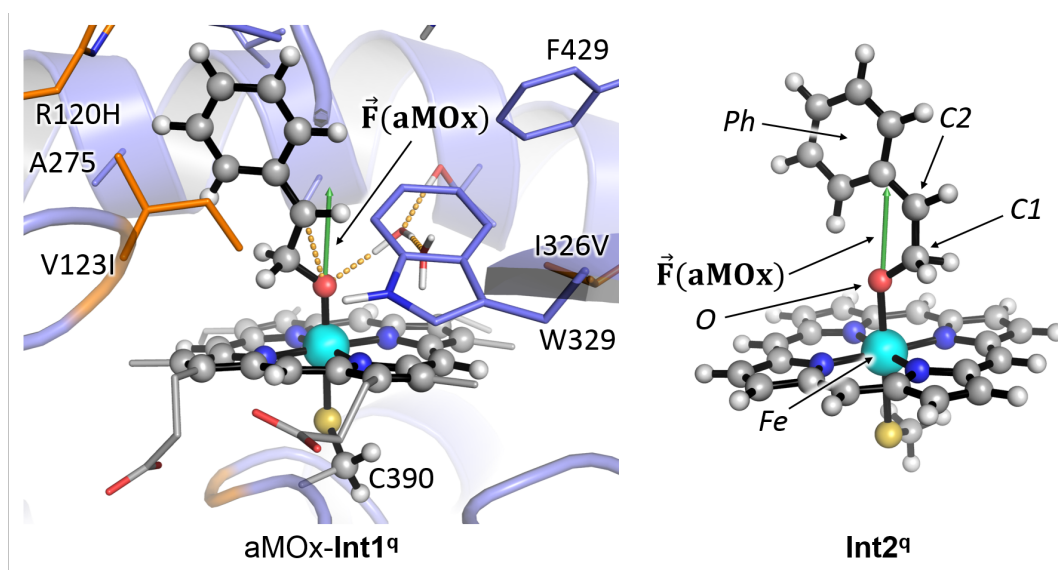

| Electric field intensity    | Int2 <sup>q</sup> Mulliken Charges (q) |       |      |       |       |
|-----------------------------|----------------------------------------|-------|------|-------|-------|
|                             | Ph                                     | C2    | C1   | O     | Fe    |
| $\vec{F}(aMOx) \times 2$    | 0.51                                   | -0.02 | 0.07 | -0.60 | 0.10  |
| $\vec{F}(aMOx) \times 1$    | 0.44                                   | -0.03 | 0.07 | -0.61 | 0.09  |
| $\vec{F}(aMOx) \times 0.5$  | 0.40                                   | -0.04 | 0.07 | -0.61 | 0.08  |
| No field                    | 0.36                                   | -0.05 | 0.07 | -0.60 | 0.07  |
| $-\vec{F}(aMOx) \times 0.5$ | 0.20                                   | -0.10 | 0.08 | -0.59 | 0.03  |
| $-\vec{F}(aMOx) \times 1$   | -0.14                                  | -0.19 | 0.10 | -0.60 | -0.06 |
| $-\vec{F}(aMOx) \times 2$   | -0.22                                  | -0.20 | 0.10 | -0.61 | -0.05 |

| Electric field intensity    | Int2 <sup>q</sup> Spin Densities ( $\rho$ ) |      |       |      |      |
|-----------------------------|---------------------------------------------|------|-------|------|------|
|                             | Ph                                          | C2   | C1    | O    | Fe   |
| $\vec{F}(aMOx) \times 2$    | 0.00                                        | 0.01 | -0.01 | 0.17 | 2.74 |
| $\vec{F}(aMOx) \times 1$    | 0.00                                        | 0.01 | 0.00  | 0.12 | 2.75 |
| $\vec{F}(aMOx) \times 0.5$  | 0.00                                        | 0.01 | 0.00  | 0.10 | 2.74 |
| No field                    | 0.00                                        | 0.01 | 0.00  | 0.08 | 2.72 |
| $-\vec{F}(aMOx) \times 0.5$ | 0.11                                        | 0.24 | -0.01 | 0.01 | 2.69 |
| $-\vec{F}(aMOx) \times 1$   | 0.34                                        | 0.61 | -0.05 | 0.16 | 2.63 |
| $-\vec{F}(aMOx) \times 2$   | 0.36                                        | 0.53 | -0.04 | 0.11 | 2.80 |

Values highlighted in gray indicate a change in the electronic configuration as compared to the electronic configuration in the absence of electric field. For example: a radical configuration when a carbocation structure is expected.

Gas phase calculations:

F)

| Electric field<br>intensity | $\Delta\Delta E$ (kcal·mol <sup>-1</sup> ) |                               |
|-----------------------------|--------------------------------------------|-------------------------------|
|                             | Int1 <sup>q</sup> (gas phase)              | Int2 <sup>d</sup> (gas phase) |
| $\vec{F}(aMOx)$ x2          | -13.6                                      | -32.8                         |
| $\vec{F}(aMOx)$ x1          | -3.3                                       | -12.6                         |
| $\vec{F}(aMOx)$ x0.5        | -0.9                                       | -4.9                          |
| No field                    | 0.0                                        | 0.6                           |
| $-\vec{F}(aMOx)$ x0.5       | -0.4                                       | 3.3                           |
| $-\vec{F}(aMOx)$ x1         | -2.1                                       | 2.4                           |
| $-\vec{F}(aMOx)$ x2         | -9.3                                       | -7.8                          |

Values highlighted in gray indicate a change in the electronic configuration as compared to the electronic configuration in the absence of electric field. For example: a radical configuration when a carbocation structure is expected.

G)

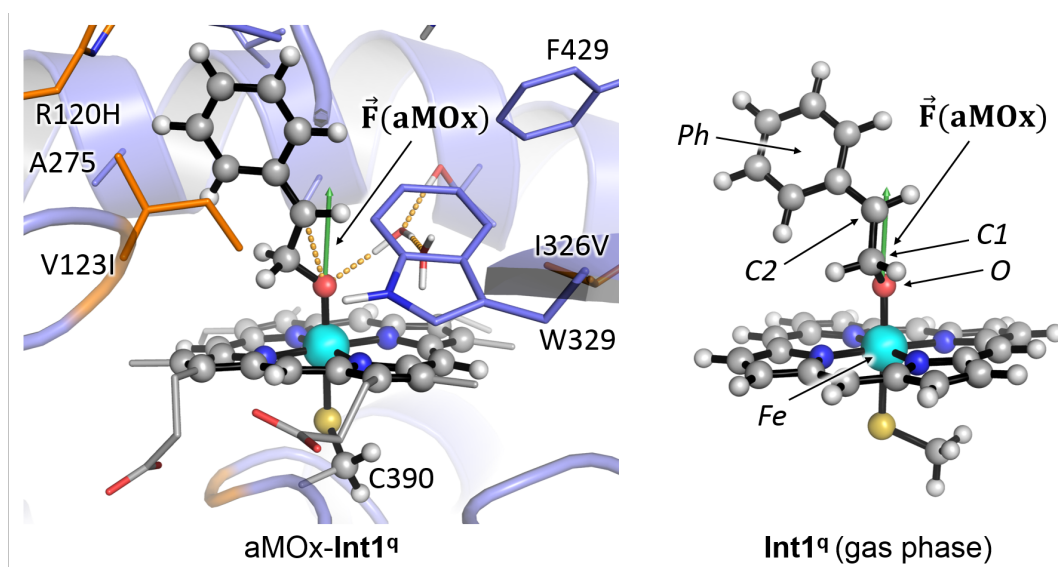

| Electric field intensity    | Int1 <sup>q</sup> (gas phase) Mulliken Charges (q) |       |      |       |       |
|-----------------------------|----------------------------------------------------|-------|------|-------|-------|
|                             | Ph                                                 | C2    | C1   | O     | Fe    |
| $\vec{F}(aMOx) \times 2$    | 0.25                                               | -0.09 | 0.00 | -0.39 | -0.17 |
| $\vec{F}(aMOx) \times 1$    | 0.11                                               | -0.12 | 0.00 | -0.37 | -0.21 |
| $\vec{F}(aMOx) \times 0.5$  | 0.07                                               | -0.13 | 0.00 | -0.37 | -0.22 |
| No field                    | 0.04                                               | -0.14 | 0.01 | -0.38 | -0.23 |
| $-\vec{F}(aMOx) \times 0.5$ | 0.02                                               | -0.14 | 0.01 | -0.39 | -0.23 |
| $-\vec{F}(aMOx) \times 1$   | -0.01                                              | -0.14 | 0.02 | -0.40 | -0.24 |
| $-\vec{F}(aMOx) \times 2$   | -0.05                                              | -0.14 | 0.03 | -0.42 | -0.25 |

| Electric field intensity    | Int1 <sup>q</sup> (gas phase) Spin Densities ( $\rho$ ) |      |       |      |      |
|-----------------------------|---------------------------------------------------------|------|-------|------|------|
|                             | Ph                                                      | C2   | C1    | O    | Fe   |
| $\vec{F}(aMOx) \times 2$    | 0.19                                                    | 0.48 | -0.01 | 0.15 | 2.18 |
| $\vec{F}(aMOx) \times 1$    | 0.25                                                    | 0.65 | -0.02 | 0.21 | 1.96 |
| $\vec{F}(aMOx) \times 0.5$  | 0.26                                                    | 0.69 | -0.03 | 0.22 | 1.90 |
| No field                    | 0.27                                                    | 0.71 | -0.03 | 0.22 | 1.86 |
| $-\vec{F}(aMOx) \times 0.5$ | 0.27                                                    | 0.72 | -0.03 | 0.21 | 1.84 |
| $-\vec{F}(aMOx) \times 1$   | 0.28                                                    | 0.72 | -0.03 | 0.21 | 1.81 |
| $-\vec{F}(aMOx) \times 2$   | 0.28                                                    | 0.71 | -0.04 | 0.18 | 1.64 |

Values highlighted in gray indicate a change in the electronic configuration as compared to the electronic configuration in the absence of electric field. For example: a radical configuration when a carbocation structure is expected.

H)

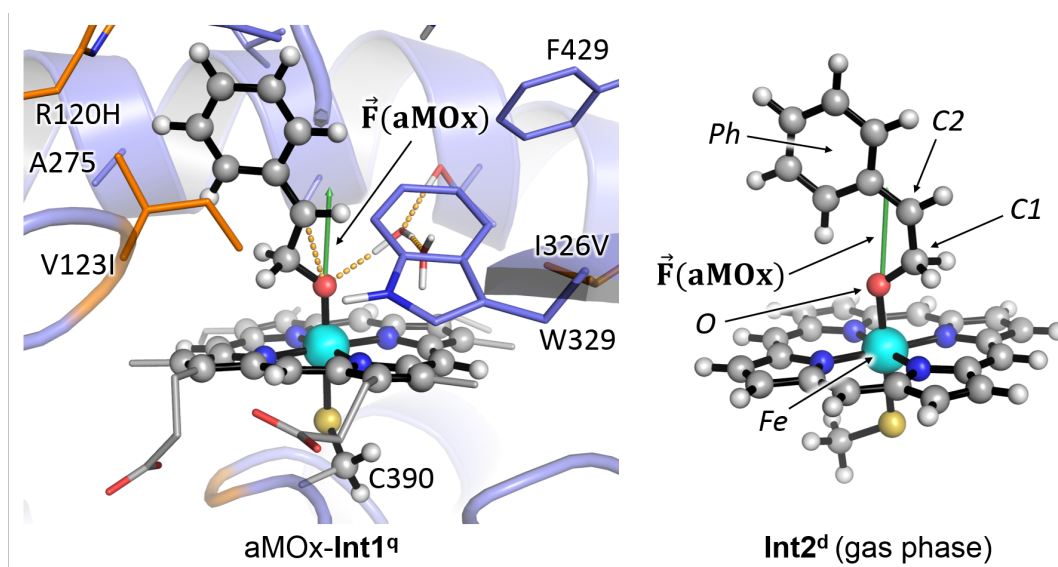

| Electric field intensity    | Int2 <sup>d</sup> (gas phase) Mulliken Charges (q) |       |      |       |       |
|-----------------------------|----------------------------------------------------|-------|------|-------|-------|
|                             | Ph                                                 | C2    | C1   | O     | Fe    |
| $\vec{F}(aMOx) \times 2$    | 0.48                                               | -0.06 | 0.06 | -0.52 | -0.11 |
| $\vec{F}(aMOx) \times 1$    | 0.41                                               | -0.07 | 0.06 | -0.52 | -0.11 |
| $\vec{F}(aMOx) \times 0.5$  | 0.36                                               | -0.09 | 0.06 | -0.51 | -0.12 |
| No field                    | 0.27                                               | -0.11 | 0.07 | -0.50 | -0.12 |
| $-\vec{F}(aMOx) \times 0.5$ | 0.18                                               | -0.13 | 0.07 | -0.50 | -0.13 |
| $-\vec{F}(aMOx) \times 1$   | -0.04                                              | -0.19 | 0.09 | -0.49 | -0.18 |
| $-\vec{F}(aMOx) \times 2$   | -0.09                                              | -0.19 | 0.09 | -0.51 | -0.18 |

| Electric field intensity    | Int2 <sup>d</sup> (gas phase) Spin Densities (ρ) |       |      |      |      |
|-----------------------------|--------------------------------------------------|-------|------|------|------|
|                             | Ph                                               | C2    | C1   | O    | Fe   |
| $\vec{F}(aMOx) \times 2$    | 0.00                                             | 0.00  | 0.00 | 0.02 | 1.01 |
| $\vec{F}(aMOx) \times 1$    | 0.00                                             | -0.01 | 0.00 | 0.02 | 0.99 |
| $\vec{F}(aMOx) \times 0.5$  | -0.03                                            | -0.09 | 0.00 | 0.05 | 0.97 |
| No field                    | -0.09                                            | -0.23 | 0.01 | 0.10 | 0.95 |
| $-\vec{F}(aMOx) \times 0.5$ | -0.15                                            | -0.36 | 0.02 | 0.12 | 0.93 |
| $-\vec{F}(aMOx) \times 1$   | -0.31                                            | -0.65 | 0.04 | 0.12 | 1.98 |
| $-\vec{F}(aMOx) \times 2$   | -0.33                                            | -0.63 | 0.04 | 0.08 | 2.03 |

Values highlighted in gray indicate a change in the electronic configuration as compared to the electronic configuration in the absence of electric field. For example: a radical configuration when a carbocation structure is expected.



**Figure S29:** Study of the impact of the local electric field direction on the stabilization of key intermediates.

**A)** Electric field components (in a.u.) of the different fields orthogonal to  $\vec{F}(aMOx)$  but with the same strength that have been used:

**Calculations considering polarization from implicit solvent model:**

**B)** Single point calculations at the (U)B3LYP/Def2TZVP/PCM(dichloromethane) in the presence of oriented electric fields as described in **A**. The DFT optimized structures of the radical and carbocation intermediates in the absence of electric field have been used, respectively.  $\Delta\Delta E$  electronic energies are given in kcal·mol<sup>-1</sup>. Radical intermediate **Int1<sup>q</sup>** in the absence of EF was used as energy reference.

**C)** Mulliken charges and spin density values (in a.u.) obtained from **Int1<sup>q</sup>** single point calculations with the different fields orthogonal to  $\vec{F}(aMOx)$  but with the same intensity. A figure showing the orientation and direction of the applied electric fields is also shown.

**D)** Mulliken charges and spin density values (in a.u.) obtained from **Int2<sup>d</sup>** single point calculations with the different fields orthogonal to  $\vec{F}(aMOx)$  but with the same intensity. A figure showing the orientation and direction of the applied electric fields is also shown.

**E)** Mulliken charges and spin density values (in a.u.) obtained from **Int2<sup>q</sup>** single point calculations with the different fields orthogonal to  $\vec{F}(aMOx)$  but with the same intensity. A figure showing the orientation and direction of the applied electric fields is also shown.

**Gas Phase calculations:**

**F)** Single point calculations at the (U)B3LYP/Def2TZVP level (gas phase) in the presence of oriented electric fields as described in **A**. The DFT optimized structures of the radical and carbocation intermediates in the gas phase and in the absence of electric field have been used, respectively.  $\Delta\Delta E$  electronic energies are given in kcal·mol<sup>-1</sup>. Radical intermediate **Int1<sup>q</sup>** (gas phase) in the absence of EF was used as energy reference.

**G)** Mulliken charges and spin density values (in a.u.) obtained from **Int1<sup>q</sup>** (gas phase) single point calculations with the different fields orthogonal to  $\vec{F}(aMOx)$  but with the same intensity. A figure showing the orientation and direction of the applied electric fields is also shown.

**H)** Mulliken charges and spin density values (in a.u.) obtained from **Int2<sup>d</sup>** (gas phase) single point calculations with the different fields orthogonal to  $\vec{F}(aMOx)$  but with the same intensity. A figure showing the orientation and direction of the applied electric fields is also shown.

A)

| Electric field directions     | Electric field components (a.u.) |          |          |
|-------------------------------|----------------------------------|----------|----------|
|                               | $F_x$                            | $F_y$    | $F_z$    |
| No field                      | 0.00000                          | 0.00000  | 0.00000  |
| $\vec{F}_i = \vec{F}(aMOx)$   | -0.00020                         | 0.00420  | -0.00030 |
| $-\vec{F}_i = -\vec{F}(aMOx)$ | 0.00020                          | -0.00420 | 0.00030  |
| $\vec{F}_j$                   | 0.00421                          | 0.00020  | -0.00001 |
| $-\vec{F}_j$                  | -0.00421                         | -0.00020 | 0.00001  |
| $\vec{F}_k$                   | 0.00000                          | 0.00030  | 0.00420  |
| $-\vec{F}_k$                  | 0.00000                          | -0.00030 | -0.00420 |

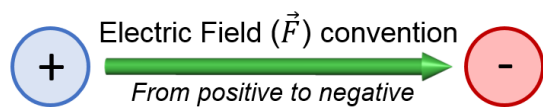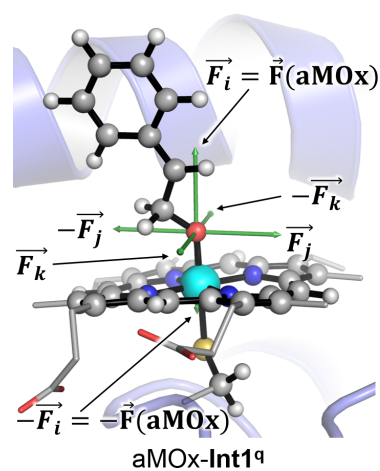

The electric field convention is that the direction of the field is from positive to negative (i.e. a free positive charge will follow the direction of the electric vector). This is the general convention despite Gaussian package uses the opposite (i.e. negative to positive).

**Calculations considering polarization from implicit solvent model:**

B)

| Electric field directions     | $\Delta\Delta E$ (kcal·mol <sup>-1</sup> ) |                   |                   |
|-------------------------------|--------------------------------------------|-------------------|-------------------|
|                               | Int1 <sup>a</sup>                          | Int2 <sup>d</sup> | Int2 <sup>a</sup> |
| No field                      | 0.0                                        | -4.1              | 3.7               |
| $\vec{F}_i = \vec{F}(aMOx)$   | -6.7                                       | -24.9             | -18.9             |
| $-\vec{F}_i = -\vec{F}(aMOx)$ | -2.2                                       | 14.8              | 7.6               |
| $\vec{F}_j$                   | -6.3                                       | -6.8              | -1.0              |
| $-\vec{F}_j$                  | -4.2                                       | -11.6             | -1.7              |
| $\vec{F}_k$                   | -5.5                                       | -9.2              | 1.0               |
| $-\vec{F}_k$                  | -3.7                                       | -8.0              | -3.0              |

Values highlighted in gray indicate a change in the electronic configuration as compared to the electronic configuration in the absence of electric field. For example: a radical configuration when a carbocation structure is expected.

c)

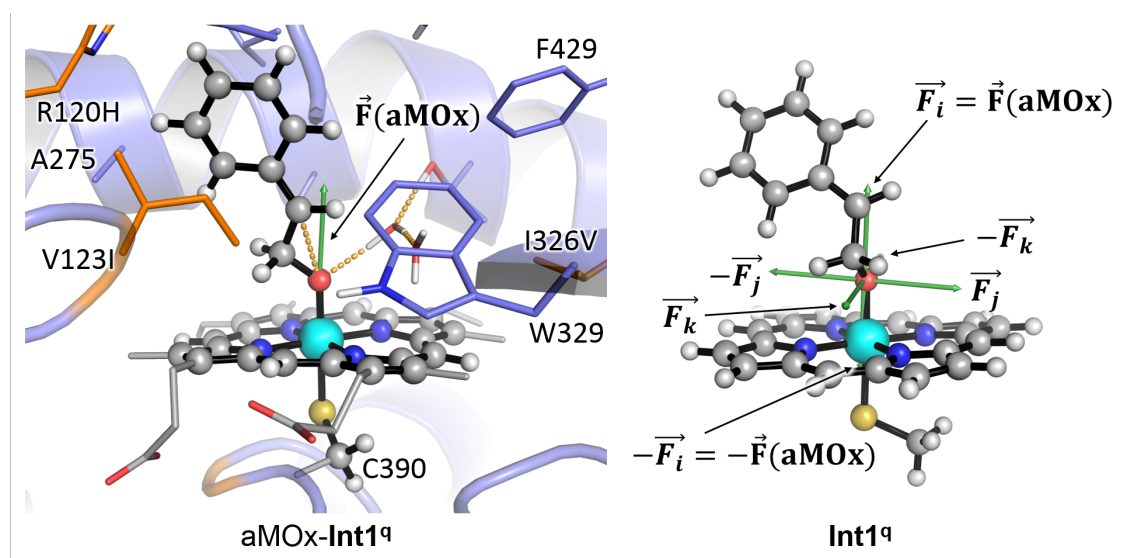

| Electric field directions     | Int1 <sup>q</sup> Mulliken Charges (q) |       |      |       |       |
|-------------------------------|----------------------------------------|-------|------|-------|-------|
|                               | Ph                                     | C2    | C1   | O     | Fe    |
| No field                      | 0.05                                   | -0.17 | 0.01 | -0.42 | -0.20 |
| $\vec{F}_i = \vec{F}(aMOx)$   | 0.24                                   | -0.11 | 0.01 | -0.42 | -0.14 |
| $-\vec{F}_i = -\vec{F}(aMOx)$ | -0.01                                  | -0.18 | 0.02 | -0.45 | -0.22 |
| $\vec{F}_j$                   | -0.01                                  | -0.16 | 0.01 | -0.42 | -0.20 |
| $-\vec{F}_j$                  | 0.12                                   | -0.17 | 0.02 | -0.42 | -0.20 |
| $\vec{F}_k$                   | 0.03                                   | -0.16 | 0.00 | -0.43 | -0.21 |
| $-\vec{F}_k$                  | 0.07                                   | -0.18 | 0.02 | -0.41 | -0.19 |

| Electric field directions     | Int1 <sup>q</sup> Spin Densities ( $\rho$ ) |      |       |      |      |
|-------------------------------|---------------------------------------------|------|-------|------|------|
|                               | Ph                                          | C2   | C1    | O    | Fe   |
| No field                      | 0.26                                        | 0.67 | 0.00  | 0.19 | 1.99 |
| $\vec{F}_i = \vec{F}(aMOx)$   | 0.18                                        | 0.48 | -0.01 | 0.12 | 2.26 |
| $-\vec{F}_i = -\vec{F}(aMOx)$ | 0.27                                        | 0.67 | 0.00  | 0.19 | 1.96 |
| $\vec{F}_j$                   | 0.27                                        | 0.68 | 0.00  | 0.20 | 1.97 |
| $-\vec{F}_j$                  | 0.25                                        | 0.67 | 0.00  | 0.17 | 2.03 |
| $\vec{F}_k$                   | 0.26                                        | 0.68 | 0.00  | 0.19 | 1.98 |
| $-\vec{F}_k$                  | 0.26                                        | 0.67 | 0.00  | 0.18 | 2.00 |

D)

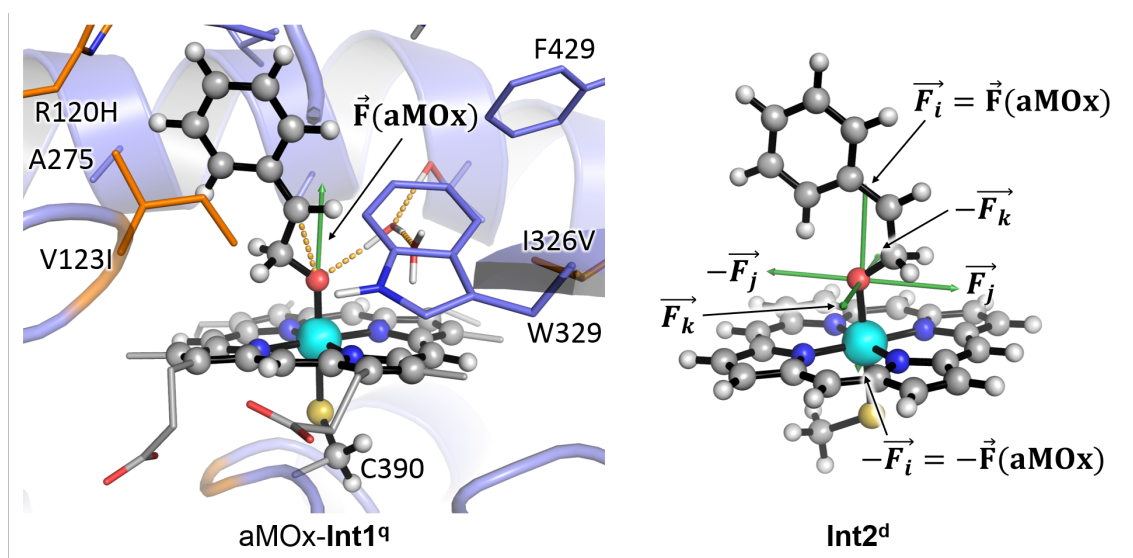

| Electric field directions     | Int2 <sup>d</sup> Mulliken Charges (q) |       |      |       |       |
|-------------------------------|----------------------------------------|-------|------|-------|-------|
|                               | Ph                                     | C2    | C1   | O     | Fe    |
| No field                      | 0.39                                   | -0.05 | 0.06 | -0.54 | -0.08 |
| $\vec{F}_i = \vec{F}(aMOx)$   | 0.47                                   | -0.03 | 0.06 | -0.54 | -0.07 |
| $-\vec{F}_i = -\vec{F}(aMOx)$ | 0.17                                   | -0.13 | 0.06 | -0.52 | -0.09 |
| $\vec{F}_j$                   | 0.33                                   | -0.05 | 0.05 | -0.54 | -0.08 |
| $-\vec{F}_j$                  | 0.45                                   | -0.04 | 0.07 | -0.53 | -0.08 |
| $\vec{F}_k$                   | 0.39                                   | -0.05 | 0.06 | -0.54 | -0.08 |
| $-\vec{F}_k$                  | 0.39                                   | -0.05 | 0.06 | -0.54 | -0.08 |

| Electric field directions     | Int2 <sup>d</sup> Spin Densities ( $\rho$ ) |      |      |      |      |
|-------------------------------|---------------------------------------------|------|------|------|------|
|                               | Ph                                          | C2   | C1   | O    | Fe   |
| No field                      | 0.00                                        | 0.00 | 0.00 | 0.01 | 1.03 |
| $\vec{F}_i = \vec{F}(aMOx)$   | 0.00                                        | 0.00 | 0.00 | 0.02 | 1.04 |
| $-\vec{F}_i = -\vec{F}(aMOx)$ | 0.02                                        | 0.01 | 0.00 | 0.02 | 1.23 |
| $\vec{F}_j$                   | 0.00                                        | 0.00 | 0.00 | 0.01 | 1.03 |
| $-\vec{F}_j$                  | 0.00                                        | 0.00 | 0.00 | 0.01 | 1.03 |
| $\vec{F}_k$                   | 0.00                                        | 0.00 | 0.00 | 0.01 | 1.03 |
| $-\vec{F}_k$                  | 0.00                                        | 0.00 | 0.00 | 0.01 | 1.03 |

E)

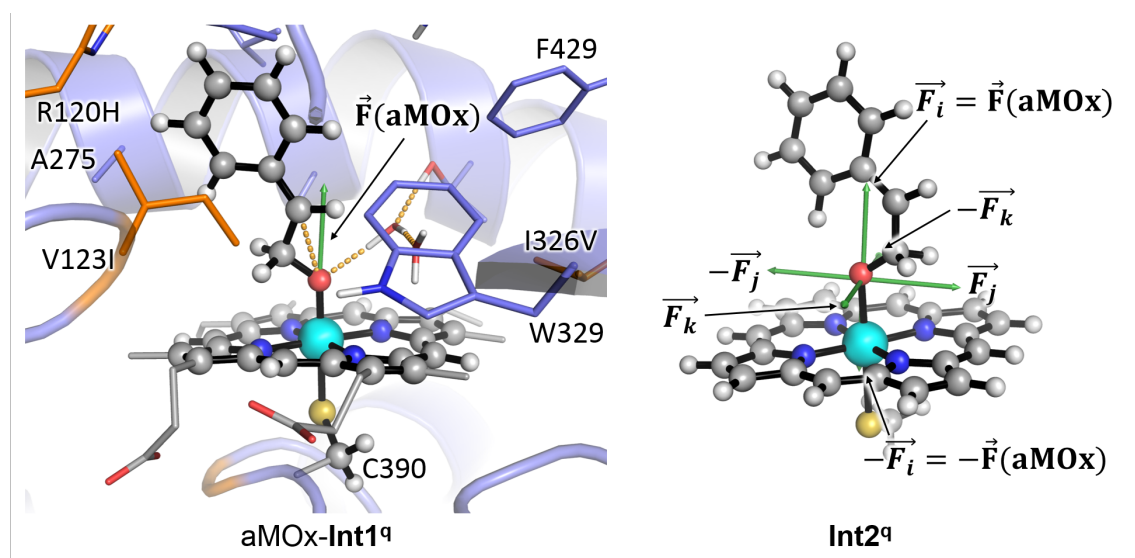

| Electric field directions     | Int2 <sup>q</sup> Mulliken Charges (q) |       |      |       |       |
|-------------------------------|----------------------------------------|-------|------|-------|-------|
|                               | Ph                                     | C2    | C1   | O     | Fe    |
| No field                      | 0.36                                   | -0.05 | 0.07 | -0.60 | 0.07  |
| $\vec{F}_i = \vec{F}(aMOx)$   | 0.44                                   | -0.03 | 0.07 | -0.61 | 0.09  |
| $-\vec{F}_i = -\vec{F}(aMOx)$ | -0.14                                  | -0.19 | 0.10 | -0.60 | -0.06 |
| $\vec{F}_j$                   | 0.31                                   | -0.05 | 0.06 | -0.60 | 0.07  |
| $-\vec{F}_j$                  | 0.41                                   | -0.04 | 0.08 | -0.59 | 0.07  |
| $\vec{F}_k$                   | 0.34                                   | -0.05 | 0.07 | -0.60 | 0.07  |
| $-\vec{F}_k$                  | 0.38                                   | -0.05 | 0.07 | -0.60 | 0.08  |

| Electric field directions     | Int2 <sup>q</sup> Spin Densities ( $\rho$ ) |      |       |      |      |
|-------------------------------|---------------------------------------------|------|-------|------|------|
|                               | Ph                                          | C2   | C1    | O    | Fe   |
| No field                      | 0.00                                        | 0.01 | 0.00  | 0.08 | 2.72 |
| $\vec{F}_i = \vec{F}(aMOx)$   | 0.00                                        | 0.01 | 0.00  | 0.12 | 2.75 |
| $-\vec{F}_i = -\vec{F}(aMOx)$ | 0.34                                        | 0.61 | -0.05 | 0.16 | 2.62 |
| $\vec{F}_j$                   | 0.00                                        | 0.01 | 0.00  | 0.07 | 2.72 |
| $-\vec{F}_j$                  | 0.00                                        | 0.00 | 0.00  | 0.08 | 2.73 |
| $\vec{F}_k$                   | 0.00                                        | 0.00 | 0.00  | 0.08 | 2.73 |
| $-\vec{F}_k$                  | 0.00                                        | 0.01 | 0.00  | 0.08 | 2.72 |

Values highlighted in gray indicate a change in the electronic configuration as compared to the electronic configuration in the absence of electric field. For example: a radical configuration when a carbocation structure is expected.

Gas phase calculations:

F)

| Electric field directions     | $\Delta\Delta E$ (kcal·mol <sup>-1</sup> ) |                               |
|-------------------------------|--------------------------------------------|-------------------------------|
|                               | Int1 <sup>a</sup> (gas phase)              | Int2 <sup>d</sup> (gas phase) |
| No field                      | 0.0                                        | 0.6                           |
| $\vec{F}_i = \vec{F}(aMOx)$   | -3.3                                       | -12.6                         |
| $-\vec{F}_i = -\vec{F}(aMOx)$ | -2.1                                       | 2.4                           |
| $\vec{F}_j$                   | -2.5                                       | -3.8                          |
| $-\vec{F}_j$                  | -4.1                                       | -1.4                          |
| $\vec{F}_k$                   | -2.5                                       | -2.0                          |
| $-\vec{F}_k$                  | -3.3                                       | -2.5                          |

Values highlighted in gray indicate a change in the electronic configuration as compared to the electronic configuration in the absence of electric field. For example: a radical configuration when a carbocation structure is expected.

G)

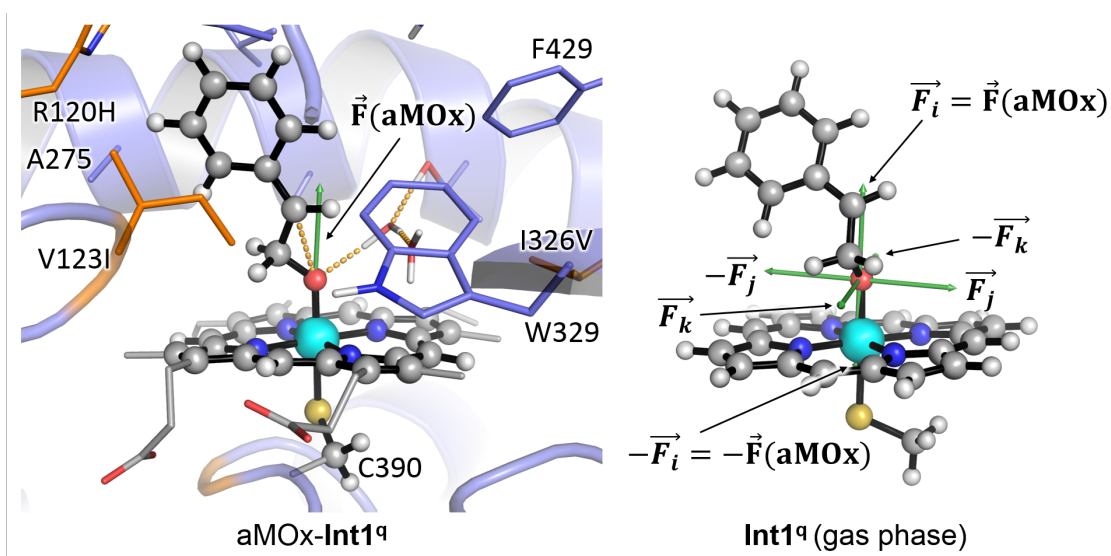

| Electric field directions     | Int1 <sup>q</sup> (gas phase) Mulliken Charges (q) |       |      |       |       |
|-------------------------------|----------------------------------------------------|-------|------|-------|-------|
|                               | Ph                                                 | C2    | C1   | O     | Fe    |
| No field                      | 0.04                                               | -0.14 | 0.01 | -0.38 | -0.23 |
| $\vec{F}_i = \vec{F}(aMOx)$   | 0.11                                               | -0.12 | 0.00 | -0.37 | -0.21 |
| $-\vec{F}_i = -\vec{F}(aMOx)$ | -0.01                                              | -0.14 | 0.02 | -0.40 | -0.24 |
| $\vec{F}_j$                   | 0.08                                               | -0.14 | 0.01 | -0.38 | -0.23 |
| $-\vec{F}_j$                  | 0.00                                               | -0.13 | 0.00 | -0.39 | -0.23 |
| $\vec{F}_k$                   | 0.05                                               | -0.14 | 0.02 | -0.38 | -0.22 |
| $-\vec{F}_k$                  | 0.03                                               | -0.13 | 0.00 | -0.39 | -0.23 |

| Electric field directions     | Int1 <sup>q</sup> (gas phase) Spin Densities (ρ) |      |       |      |      |
|-------------------------------|--------------------------------------------------|------|-------|------|------|
|                               | Ph                                               | C2   | C1    | O    | Fe   |
| No field                      | 0.27                                             | 0.71 | -0.03 | 0.22 | 1.86 |
| $\vec{F}_i = \vec{F}(aMOx)$   | 0.25                                             | 0.65 | -0.02 | 0.21 | 1.96 |
| $-\vec{F}_i = -\vec{F}(aMOx)$ | 0.28                                             | 0.72 | -0.03 | 0.21 | 1.81 |
| $\vec{F}_j$                   | 0.26                                             | 0.70 | -0.03 | 0.22 | 1.88 |
| $-\vec{F}_j$                  | 0.27                                             | 0.71 | -0.03 | 0.22 | 1.85 |
| $\vec{F}_k$                   | 0.27                                             | 0.71 | -0.03 | 0.22 | 1.87 |
| $-\vec{F}_k$                  | 0.27                                             | 0.71 | -0.03 | 0.22 | 1.85 |

H)

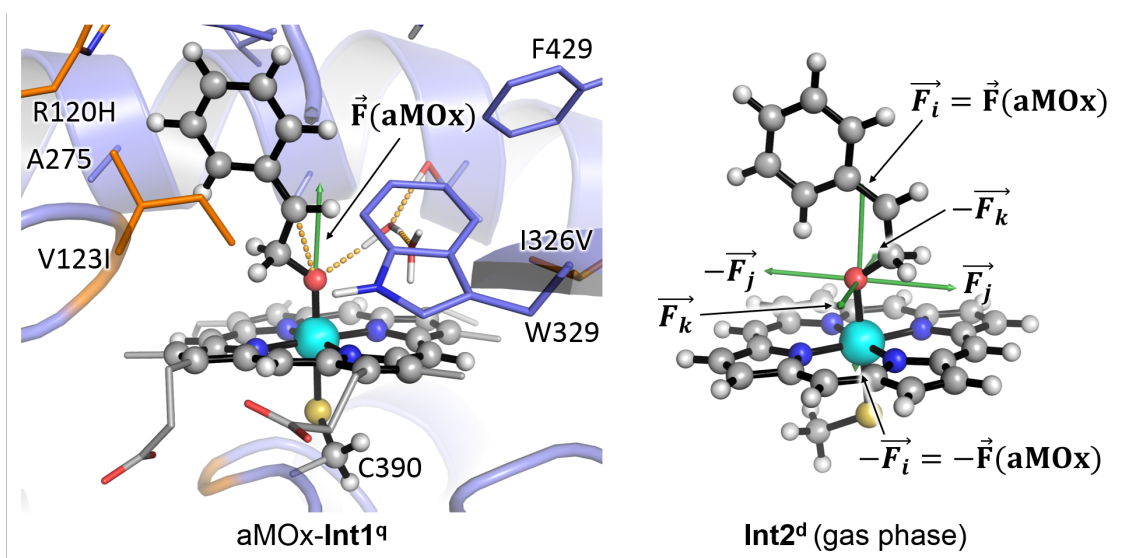

| Electric field directions     | Int2 <sup>d</sup> (gas phase) Mulliken Charges (q) |       |      |       |       |
|-------------------------------|----------------------------------------------------|-------|------|-------|-------|
|                               | Ph                                                 | C2    | C1   | O     | Fe    |
| No field                      | 0.27                                               | -0.11 | 0.07 | -0.50 | -0.12 |
| $\vec{F}_i = \vec{F}(aMOx)$   | 0.41                                               | -0.07 | 0.06 | -0.52 | -0.11 |
| $-\vec{F}_i = -\vec{F}(aMOx)$ | -0.04                                              | -0.19 | 0.09 | -0.49 | -0.18 |
| $\vec{F}_j$                   | 0.32                                               | -0.10 | 0.08 | -0.50 | -0.12 |
| $-\vec{F}_j$                  | 0.22                                               | -0.12 | 0.06 | -0.50 | -0.13 |
| $\vec{F}_k$                   | 0.27                                               | -0.11 | 0.07 | -0.50 | -0.12 |
| $-\vec{F}_k$                  | 0.27                                               | -0.11 | 0.07 | -0.50 | -0.12 |

| Electric field directions     | Int2 <sup>d</sup> (gas phase) Spin Densities (ρ) |       |      |      |      |
|-------------------------------|--------------------------------------------------|-------|------|------|------|
|                               | Ph                                               | C2    | C1   | O    | Fe   |
| No field                      | -0.09                                            | -0.23 | 0.01 | 0.10 | 0.95 |
| $\vec{F}_i = \vec{F}(aMOx)$   | 0.00                                             | -0.01 | 0.00 | 0.02 | 0.99 |
| $-\vec{F}_i = -\vec{F}(aMOx)$ | -0.31                                            | -0.65 | 0.04 | 0.12 | 1.98 |
| $\vec{F}_j$                   | -0.07                                            | -0.20 | 0.01 | 0.08 | 0.95 |
| $-\vec{F}_j$                  | -0.11                                            | -0.27 | 0.01 | 0.10 | 0.94 |
| $\vec{F}_k$                   | -0.10                                            | -0.24 | 0.01 | 0.10 | 0.95 |
| $-\vec{F}_k$                  | -0.09                                            | -0.23 | 0.01 | 0.09 | 0.95 |

Values highlighted in gray indicate a change in the electronic configuration as compared to the electronic configuration in the absence of electric field. For example: a radical configuration when a carbocation structure is expected.



DFT calculations using the computational truncated model have been carried out in order to assess the impact that the LEF generated by the protein has on the stabilization of the key intermediates involved in the studied reactions. Calculations showed that generated LEF in aMOx active site has the suitable orientation, direction and strength to favor the formation and stabilization of the carbocation **Int2** (**Figures S25, S28 and S29**). Other orientations and directions of the electric field would lead to much less or insignificant stabilization of the carbocation intermediate **Int2** as compared to radical **Int1**

These results support the conclusion that aMOx and P450<sub>LA1</sub> scaffolds generate an optimal electrostatic preorganization and local electric field that favors the formation of carbocation **Int2**.

## VII. Absolute energies of the characterized stationary points

**Table S3:** Energies and thermochemistry parameters (at T = 298.15 K and P = 1 atm) of all DFT optimized stationary points reported in **Figures S1 to S2** and **S4** and **Table S1:** Electronic energies (E), enthalpy (H), free energy (G), quasi harmonic corrected free energy (G-qh), electronic energies from high level single point calculations (E(SP)), and imaginary frequencies for the TS. All energies are given in a.u.

| Structure                                  | Electronic State | E            | H            | G            | G-qh         | E(SP)                     | Imag. Freq.   |
|--------------------------------------------|------------------|--------------|--------------|--------------|--------------|---------------------------|---------------|
| [ 1 + Cpd I ]<br>(reactant complex)        | doublet (d)      | -1935.265125 | -1934.780477 | -1934.880918 | -1934.878482 | -3075.828461              | -             |
|                                            | quartet (q)      | -1935.264817 | -1934.780147 | -1934.881164 | -1934.878701 | -3075.828095              | -             |
| TS1<br>(conformer 1)                       | doublet (d)      | -1935.242306 | -1934.759298 | -1934.855056 | -1934.853430 | -3075.813350              | 907.8i        |
|                                            | quartet (q)      | -1935.243414 | -1934.760303 | -1934.854566 | -1934.853497 | -3075.814598              | 461.1i        |
| TS1<br>(conformer 2)                       | doublet (d)      | -1935.242243 | -1934.759322 | -1934.856449 | -1934.854333 | -3075.811944              | 649.7i        |
|                                            | quartet (q)      | -1935.242758 | -1934.759627 | -1934.855291 | -1934.853638 | -3075.811734              | 496.2i        |
| Int1                                       | quartet (q)      | -1935.281328 | -1934.796395 | -1934.891310 | -1934.890105 | -3075.851040              | -             |
| TS-rotation                                | quartet (q)      | -1935.276546 | -1934.793228 | -1934.885900 | -1934.885140 | -3075.847996              | 44.3i         |
| TS2                                        | quartet (q)      | -1935.279376 | -1934.795513 | -1934.890321 | -1934.889208 | -3075.845657              | 265.9i        |
| [ 2 + Fe(III)-Porph ]<br>(product complex) | doublet (d)      | -1935.325727 | -1934.838700 | -1934.932404 | -1934.931468 | -3075.894010              | -             |
|                                            | quartet (q)      | -1935.325022 | -1934.838378 | -1934.940629 | -1934.937327 | -3075.886509              | -             |
| Int2                                       | doublet (d)      | -1935.290374 | -1934.806235 | -1934.899050 | -1934.898554 | -3075.857663              | -             |
|                                            | MECP             | -1935.277517 | -1934.797501 | -1934.891096 | -1934.890811 | -3075.846824 <sup>a</sup> | No stationary |
|                                            | quartet (q)      | -1935.277506 | -1934.794285 | -1934.891641 | -1934.890895 | -3075.845175              | -             |
| TS3                                        | doublet (d)      | -1935.288331 | -1934.805889 | -1934.898489 | -1934.897724 | -3075.856393              | 520.8i        |
|                                            | quartet (q)      | -1935.277177 | -1934.795399 | -1934.891983 | -1934.890975 | -3075.845409              | 293.5i        |
| [ 3 + Fe(III)-Porph ]<br>(product complex) | doublet (d)      | -1935.361687 | -1934.875234 | -1934.970606 | -1934.969210 | -3075.926939              | -             |
|                                            | quartet (q)      | -1935.359022 | -1934.873030 | -1934.975805 | -1934.972938 | -3075.923585              | -             |

<sup>a</sup>E(SP) energy value of Int2<sup>MECP</sup> was obtained at the quartet electronic state on the optimized MECP structure.

**Table S4:** Energies and thermochemistry parameters (at T = 298.15 K and P = 1 atm) of DFT key intermediate models which include water, an oriented external electric field, and/or in gas phase conditions as reported in **Figures S9, S26, and S27**: Electronic energies (E), enthalpy (H), free energy (G), quasi harmonic corrected free energy (G-qh), electronic energies from high level single point calculations (E(SP)), and imaginary frequencies for the TS. All energies are given in a.u.

| <b>Structure</b>           | <b>Electronic State</b> | <b>E</b>     | <b>H</b>     | <b>G</b>     | <b>G-qh</b>  | <b>E(SP)</b> | <b>Imag. Freq.</b> |
|----------------------------|-------------------------|--------------|--------------|--------------|--------------|--------------|--------------------|
| <b>Int1-wat</b>            | quartet (q)             | -2011.707699 | -2011.195223 | -2011.298351 | -2011.296838 | -3152.335645 | -                  |
| <b>Int2-wat</b>            | doublet (d)             | -2011.715644 | -2011.203764 | -2011.303542 | -2011.302938 | -3152.342817 | -                  |
|                            | quartet (d)             | -2011.705827 | -2011.194723 | -2011.299252 | -2011.298181 | -3152.336261 | -                  |
| <b>Int1-EF</b>             | quartet (q)             | -1935.281356 | -1934.796473 | -1934.891700 | -1934.890313 | -3075.861966 | -                  |
| <b>Int2-EF</b>             | doublet (d)             | -1935.290312 | -1934.806200 | -1934.898890 | -1934.898493 | -3075.891142 | -                  |
|                            | quartet (d)             | -1935.277521 | -1934.794305 | -1934.891691 | -1934.890820 | -3075.881490 | -                  |
| <b>Int1 (gas phase)</b>    | quartet (q)             | -1935.266178 | -1934.781378 | -1934.877347 | -1934.875499 | -3075.838272 | -                  |
| <b>Int2 (gas phase)</b>    | doublet (d)             | -1935.267514 | -1934.784403 | -1934.878430 | -1934.877433 | -3075.837333 | -                  |
| <b>Int1-EF (gas phase)</b> | quartet (q)             | -1935.266178 | -1934.781378 | -1934.877340 | -1934.875497 | -3075.843462 | -                  |
| <b>Int1-EF (gas phase)</b> | doublet (d)             | -1935.267514 | -1934.784402 | -1934.878430 | -1934.877433 | -3075.858397 | -                  |
|                            | quartet (d)             | -1935.254937 | -1934.772121 | -1934.873096 | -1934.870984 | -3075.837275 | -                  |

**Table S5:** Energies and thermochemistry parameters (at T = 298.15 K and P = 1 atm) of all QM/MM optimized stationary points reported in **Figure S14**: QM Electronic energies ( $E_{QM}$ ), MM energies ( $E_{MM}$ ), enthalpy corrections (H correction), free energy corrections (G correction), QM electronic energies from high level single point calculations ( $E_{QM}(SP)$ ), and imaginary frequencies for the TS. All energies are given in a.u.

| Structure        | Electronic State | $E_{QM}$     | $E_{MM}$   | H correction | G correction | $E_{QM}(SP)$ | Imag. Freq. |
|------------------|------------------|--------------|------------|--------------|--------------|--------------|-------------|
| LA1-1            | doublet (d)      | -1935.351349 | -33.084589 | 21.514788    | 19.219301    | -3075.754223 | -           |
|                  | quartet (q)      | -1935.351338 | -33.084660 | 21.514809    | 19.219092    | -3075.754211 | -           |
| LA1-TS1          | doublet (d)      | -1935.330082 | -33.078188 | 21.513777    | 19.221848    | -3075.732727 | 1176.5i     |
|                  | quartet (q)      | -1935.329990 | -33.078586 | 21.512806    | 19.219680    | -3075.730383 | 536.6i      |
| LA1-Int1         | doublet (d)      | -1935.371117 | -33.076224 | 21.514896    | 19.222621    | -3075.763804 | -           |
|                  | quartet (q)      | -1935.361684 | -33.082500 | 21.515726    | 19.220808    | -3075.763805 | -           |
| LA1-TS2          | quartet (q)      | -1935.365557 | -33.077532 | 21.515204    | 19.221040    | -3075.765857 | 246.6i      |
| LA1-2-S          | doublet (d)      | -1935.400827 | -33.073524 | 21.518979    | 19.228222    | -3075.798238 | -           |
|                  | quartet (q)      | -1935.413905 | -33.064068 | 21.518725    | 19.225065    | -3075.811396 | -           |
| LA1-Int2         | doublet (d)      | -1935.368357 | -33.076648 | 21.515114    | 19.223893    | -3075.768582 | -           |
|                  | quartet (q)      | -1935.378882 | -33.065326 | 21.514123    | 19.220382    | -3075.778619 | -           |
| LA1-TS3-cis-re   | doublet (d)      | -1935.368594 | -33.075916 | 21.513368    | 19.222331    | -3075.762461 | 568.4i      |
|                  | quartet (q)      | -1935.376298 | -33.068129 | 21.512809    | 19.219646    | -3075.776528 | 252.9i      |
| LA1-TS3-trans-si | doublet (d)      | -1935.363562 | -33.077474 | 21.513879    | 19.224325    | -3075.765706 | 609.0i      |
|                  | quartet (q)      | -1935.374502 | -33.068434 | 21.512948    | 19.219898    | -3075.775666 | 365.1i      |
| LA1-3            | doublet (d)      | -1935.440131 | -33.082048 | 21.517279    | 19.223487    | -3075.840844 | -           |
|                  | quartet (q)      | -1935.455678 | -33.073811 | 21.517330    | 19.221186    | -3075.856313 | -           |

**Table S6:** Energies and thermochemistry parameters (at T = 298.15 K and P = 1 atm) of all QM/MM optimized stationary points reported in **Figures S15** and **S18**: QM Electronic energies ( $E_{QM}$ ), MM energies ( $E_{MM}$ ), enthalpy corrections (H correction), free energy corrections (G correction), QM electronic energies from high level single point calculations ( $E_{QM}(SP)$ ), and imaginary frequencies for the TS. All energies are given in a.u.

| Structure        | Electronic State | $E_{QM}$     | $E_{MM}$   | H correction | G correction | $E_{QM}(SP)$ | Imag. Freq. |
|------------------|------------------|--------------|------------|--------------|--------------|--------------|-------------|
| LA1-1            | doublet (d)      | -1935.332059 | -33.746423 | 21.075534    | 18.825776    | -3075.735388 | -           |
|                  | quartet (q)      | -1935.332095 | -33.746318 | 21.075581    | 18.825418    | -3075.735286 | -           |
| LA1-TS1          | doublet (d)      | -1935.315493 | -33.738259 | 21.073208    | 18.825083    | -3075.717371 | 565.6i      |
|                  | quartet (q)      | -1935.312160 | -33.742797 | 21.073874    | 18.825508    | -3075.713645 | 536.6i      |
| LA1-Int1         | doublet (d)      | -1935.356247 | -33.737708 | 21.075330    | 18.828193    | -3075.752882 | -           |
|                  | quartet (q)      | -1935.348563 | -33.742400 | 21.075907    | 18.827339    | -3075.750662 | -           |
| LA1-TS2          | quartet (q)      | -1935.352368 | -33.737562 | 21.075357    | 18.827551    | -3075.752516 | 232.7i      |
| LA1-2-R          | doublet (d)      | -1935.389901 | -33.736014 | 21.078196    | 18.829823    | -3075.788047 | -           |
|                  | quartet (q)      | -1935.402571 | -33.733395 | 21.077863    | 18.827183    | -3075.801398 | -           |
| LA1-Int2         | doublet (d)      | -1935.367946 | -33.730257 | 21.074889    | 18.829591    | -3075.767176 | -           |
|                  | quartet (q)      | -1935.375375 | -33.719533 | 21.073837    | 18.824622    | -3075.774333 | -           |
| LA1-TS3-cis-si   | doublet (d)      | -1935.365349 | -33.730285 | 21.072931    | 18.826421    | -3075.766575 | 662.5i      |
|                  | quartet (q)      | -1935.373458 | -33.720084 | 21.072514    | 18.824221    | -3075.773553 | 475.8i      |
| LA1-TS3-trans-re | doublet (d)      | -1935.362167 | -33.732088 | 21.073130    | 18.825918    | -3075.764348 | 547.3i      |
|                  | quartet (q)      | -1935.372045 | -33.720877 | 21.072808    | 18.824431    | -3075.772187 | 359.4i      |
| LA1-3            | doublet (d)      | -1935.438046 | -33.733051 | 21.077289    | 18.828491    | -3075.837861 | -           |
|                  | quartet (q)      | -1935.451814 | -33.722890 | 21.076884    | 18.826072    | -3075.850967 | -           |

**Table S7:** Energies and thermochemistry parameters (at T = 298.15 K and P = 1 atm) of all QM/MM optimized stationary points reported in **Figures S19** and **S22**: QM Electronic energies ( $E_{QM}$ ), MM energies ( $E_{MM}$ ), enthalpy corrections (H correction), free energy corrections (G correction), QM electronic energies from high level single point calculations ( $E_{QM(SP)}$ ), and imaginary frequencies for the TS. All energies are given in a.u.

| Structure         | Electronic State | $E_{QM}$     | $E_{MM}$   | H correction | G correction | $E_{QM(SP)}$ | Imag. Freq. |
|-------------------|------------------|--------------|------------|--------------|--------------|--------------|-------------|
| aMOx-1            | doublet (d)      | -1935.333357 | -32.712510 | 21.216497    | 18.962179    | -3075.737987 | -           |
|                   | quartet (q)      | -1935.333224 | -32.712667 | 21.216535    | 18.962108    | -3075.737716 | -           |
| aMOx-TS1          | doublet (d)      | -1935.311884 | -32.721937 | 21.215266    | 18.965431    | -3075.717137 | 730.71i     |
|                   | quartet (q)      | -1935.308749 | -32.724638 | 21.215219    | 18.965361    | -3075.713160 | 562.80i     |
| aMOx-Int1         | doublet (d)      | -1935.353642 | -32.722520 | 21.215587    | 18.964836    | -3075.753075 | -           |
|                   | quartet (q)      | -1935.346585 | -32.729377 | 21.216309    | 18.964322    | -3075.752112 | -           |
| aMOx-TS-rotation  | doublet (d)      | -1935.332542 | -32.728321 | 21.215027    | 18.965502    | -3075.735061 | 198.9i      |
|                   | quartet (q)      | -1935.333718 | -32.732248 | 21.214739    | 18.965276    | -3075.738736 | 28.5i       |
| aMOx-TS2 pro-S    | doublet (d)      | -1935.343453 | -32.724584 | 21.216917    | 18.968298    | -3075.745461 | 165.36i     |
|                   | quartet (q)      | -1935.344953 | -32.720409 | 21.216191    | 18.966326    | -3075.746106 | 204.84i     |
| aMOx-TS2 pro-R    | doublet (d)      | -1935.345426 | -32.713461 | 21.218015    | 18.972809    | -3075.746322 | 272.29i     |
|                   | quartet (q)      | -1935.355773 | -32.691483 | 21.217486    | 18.970633    | -3075.757005 | 283.45i     |
| aMOx-2-S          | doublet (d)      | -1935.384645 | -32.719154 | 21.219332    | 18.968274    | -3075.788313 | -           |
|                   | quartet (q)      | -1935.396595 | -32.711121 | 21.219612    | 18.966711    | -3075.799978 | -           |
| aMOx-2-R          | doublet (d)      | -1935.374758 | -32.718887 | 21.220610    | 18.971738    | -3075.777062 | -           |
|                   | quartet (q)      | -1935.391825 | -32.716978 | 21.218939    | 18.967188    | -3075.793889 | -           |
| aMOx-Int2         | doublet (d)      | -1935.365568 | -32.704801 | 21.215140    | 18.965195    | -3075.768084 | -           |
|                   | quartet (q)      | -1935.363783 | -32.699454 | 21.214301    | 18.961688    | -3075.764836 | -           |
| aMOx-TS3-cis-re   | doublet (d)      | -1935.364189 | -32.705604 | 21.213734    | 18.965050    | -3075.767524 | 467.16i     |
|                   | quartet (q)      | -1935.364236 | -32.700888 | 21.213009    | 18.962149    | -3075.766227 | 656.28i     |
| aMOx-TS3-trans-si | doublet (d)      | -1935.361163 | -32.704075 | 21.214167    | 18.965147    | -3075.765368 | 518.92i     |
|                   | quartet (q)      | -1935.361838 | -32.699253 | 21.213483    | 18.962155    | -3075.764167 | 378.06i     |
| aMOx-3            | doublet (d)      | -1935.427515 | -32.709415 | 21.217914    | 18.965831    | -3075.830264 | -           |
|                   | quartet (q)      | -1935.433494 | -32.709659 | 21.217860    | 18.963220    | -3075.835787 | -           |

a

b

<sup>a</sup> aMOx-**Int2**<sup>a</sup> was optimized with C2-*cis*-H, C2-*trans*-H, and *cis*-H-*trans*-H distances frozen. Distance values are taken from optimized structure in the doublet state. Frequency calculation showed that the optimized structure has all frequencies positive.

<sup>b</sup> aMOx-**TS3-cis-re**<sup>a</sup> was optimized with C2-*cis*-H, C1-*cis*-H and O-C1 distances frozen. Distance values are taken from optimized structure in the doublet state. Frequency calculation showed that all frequencies of the optimized structure are positive except one, which corresponds to the H-migration coordinate.

**Table S8:** Energies and thermochemistry parameters (at T = 298.15 K and P = 1 atm) of all QM/MM optimized stationary points reported in **Figure S23**: QM Electronic energies ( $E_{QM}$ ), MM energies ( $E_{MM}$ ), enthalpy corrections (H correction), free energy corrections (G correction), QM electronic energies from high level single point calculations ( $E_{QM}(SP)$ ), and imaginary frequencies for the TS. All energies are given in a.u.

| Structure         | Electronic State | $E_{QM}$     | $E_{MM}$   | H correction | G correction | $E_{QM}(SP)$ | Imag. Freq. |
|-------------------|------------------|--------------|------------|--------------|--------------|--------------|-------------|
| aMOx-1            | doublet (d)      | -1935.338494 | -34.059275 | 18.960519    | 16.933275    | -3075.741695 | -           |
|                   | quartet (q)      | -1935.336423 | -34.061060 | 18.960343    | 16.932280    | -3075.739559 | -           |
| aMOx-TS1          | doublet (d)      | -1935.313335 | -34.038172 | 18.959442    | 16.934153    | -3075.715825 | 815.70i     |
|                   | quartet (q)      | -1935.309333 | -34.047519 | 18.958746    | 16.931954    | -3075.712011 | 644.22i     |
| aMOx-Int1         | doublet (d)      | -1935.355270 | -34.036612 | 18.960335    | 16.934571    | -3075.751600 | -           |
|                   | quartet (q)      | -1935.348978 | -34.042221 | 18.961458    | 16.935269    | -3075.751028 | -           |
| aMOx-TS2          | doublet (d)      | -1935.351443 | -34.037669 | 18.960346    | 16.936449    | -3075.746717 | 298.38i     |
|                   | quartet (q)      | -1935.353640 | -34.035004 | 18.960589    | 16.935521    | -3075.753894 | 291.80i     |
| aMOx-2-R          | doublet (d)      | -1935.394311 | -34.036759 | 18.963203    | 16.936829    | -3075.796103 | -           |
|                   | quartet (q)      | -1935.411262 | -34.028680 | 18.963239    | 16.936302    | -3075.812572 | -           |
| aMOx-Int2         | doublet (d)      | -1935.350515 | -34.046698 | 18.959657    | 16.934921    | -3075.751475 | -           |
|                   | quartet (q)      | -1935.359256 | -34.036149 | 18.958777    | 16.931831    | -3075.759424 | -           |
| aMOx-TS3-cis-si   | doublet (d)      | -1935.348892 | -34.045948 | 18.958300    | 16.933753    | -3075.751202 | 594.37i     |
|                   | quartet (q)      | -1935.359837 | -34.034443 | 18.957697    | 16.931455    | -3075.761026 | 422.01i     |
| aMOx-TS3-trans-re | doublet (d)      | -1935.347017 | -34.047826 | 18.958259    | 16.933640    | -3075.749718 | 568.28i     |
|                   | quartet (q)      | -1935.358925 | -34.035410 | 18.957669    | 16.930973    | -3075.760527 | 391.82i     |
| aMOx-3            | doublet (d)      | -1935.426242 | -34.050773 | 18.962880    | 16.934412    | -3075.827505 | -           |
|                   | quartet (q)      | -1935.444105 | -34.039749 | 18.962439    | 16.931293    | -3075.845771 | -           |



## B. Experimental section

### I. Materials and Methods

**(A) Chemicals and Enzymes:** All solvents, buffer components and chemicals were purchased from commercial suppliers (Merck, Sigma-Aldrich, Alfa Aesar, Fisher Scientific, Carl Roth). Lysozyme and DNase I were purchased from Carl Roth and GoldBio respectively.

**(B) NMR spectroscopy:**  $^1\text{H}$  and  $^{13}\text{C}$  NMR spectra were recorded on a Bruker Avance spectrometer working at a frequency of 500 MHz (protons) using  $\text{CDCl}_3$  as solvents. Chemical shifts ( $\delta$ ) are given in ppm and referenced to the residual solvent peak or tetramethylsilane. Coupling constants (Hz) and signal multiplicity (s = singlet, d = doublet, dt = doublet of triplets, t = triplet, m = multiplet) are as well noted in the conventional form.

**(C) GC-MS analysis:** Gas chromatography-mass spectrometry was carried out on an Agilent GC 7820A instrument coupled with an Agilent 5977B Series mass selective detector (MSD). An Agilent HP-5MS UI column (30 m  $\times$  250  $\mu\text{m}$   $\times$  0.25  $\mu\text{m}$ ) was operated with hydrogen as carrier gas (40  $\text{cm s}^{-1}$ ). Injector temperature: 250°C. Split mode with a split ratio of 1:50. Electron ionization of the analyte with 70 eV acceleration voltage. Temperature profile: 90°C for 2 min, 5°C/min to 100°C, 10°C/min to 130°C, 50°C/min to 200 min, hold 0.5 min.

**(D) Chiral GC analysis:** Chiral gas chromatography analysis was performed on a Shimadzu GC-2010 instrument equipped with a flame ionization detector (FID) using an Agilent CP-Chirasil-Dex CB column (30 m  $\times$  250  $\mu\text{m}$   $\times$  0.25  $\mu\text{m}$ , CP7502) with hydrogen as carrier gas (40  $\text{cm s}^{-1}$  linear velocity). Injector temperature: 220°C. Split mode with a split ratio of 1:20, 1  $\mu\text{L}$  injection volume. Detector temperature: 250°C. Temperature profile: 70°C for 2 min, 4°C/min to 102°C, 10°C/min to 140°C, 30°C/min to 190 min, hold 4 min.

**(E) DNA sequences:** Gene and amino acid sequence of phenylacetaldehyde reductase from *Rhodococcus* Sp., ST-10 (PAR-ADH) cloned into a pET22b(+) vector containing a C-terminal 6 $\times$ His-tag.<sup>68</sup>

### PAR-ADH

```
ATGAAGGCCATCCAGTACACTCGCATTGGCGCTGAGCCTGAACTGACTGAGATCCCAAAGCCCGAGCCCGGGCCCGGAGAAGT
CCTTCTTGAAGTGACAGCAGCCGGAGTTTGTCACTCTGATGATTTTATTATGAGCTTGCCAGAAGAACAGTATACCTACGGGT
TACCCTTGACATTAGGACACGAAGGAGCAGGGAAGGTGCGCAGCCGTGGGTGAGGGCGTTGAGGGATTAGATATCGGCACGAAC
GTCGTAGTGTACGGCCCGTGGGGCTGTGGAAATTGCTGGCACTGTTCTCAGGGTCTTGAGAACTATTGTAGTCGCGCACAGGA
GTTAGGAATTAACCCCTCCAGGATTGGGAGCTCCAGGGGCATTGGCCGAGTTTATGATCGTAGATAGTCCCCGCCATTTAGTGC
CTATTGGAGACTTAGACCCAGTTAAACTGTTCCATTGACCGACGCGGGTCTTACACCTTATCACGCTATTAAACGTAGCTTA
CCCAAGCTTCGTGGCGGATCGTATGCGGTGGTTATTGGCACGGGCGGCCCTTGGCCATGTCGCCATCCAATTATTACGTCACTT
GTCGGCGGCCACTGTCATTGCCTTGGACGTTAGTGCAGATAAACTTGAATTAGCTACGAAAGTCGGGGCCCATGAGGTTGTGT
TAAGCGATAAAGATGCTGCCGAAAATGTACGTAAGATCACAGGATCACAGGGAGCTGCACTTGTCTTAGATTTTCGTCCGATAT
CAGCCACAATCGATACCGCGATGGCCGTGGCCGGTTCGGTAGCGATGTCACCATTGTGGGCATTGGGACGGACAAGCCCA
CGCAAAGTCGGATTCTTTCAAAGCCCTACGAAGCTTCTGTAACCGTTCTTACTGGGGTGCACGCAACGAATTAATCGAAC
```

TGATCGATTTAGCCCACGCCGGGATCTTCGACATTTCCGGTAGAACTTTCTCTTTGGATAACGGTGCAGAGGCGTACCGTTCG  
TTGGCGCGGGTACGCTGAGTGGCCGTGCCGTGGTGGTTCCGGGTTTGCCTCGAGCACCATCACCACCATCAC**TGA**

MKAIQYTRIGAEPELTFEIPKPEPGPGEVLLLEVTAAGVCHSDDFIMSLPEEQYTYGLPLTLGHEGAGKVAAVGEGVEGLDIGTN  
VVVYGPWGCNCWHSQGLENYCSRAQELGINPPGLGAPGALAEFMIVDSRHLVPIGDLDPVKTVPLTDAGLTPYHAIKRSL  
PKLRGGSYAVVIGTGGGLGHVAIQLLRHLSAATVIALDVSADKLELATKVGAEVVLSDKDAENVRKI TGSQGAALVLDVFGY  
QPTIDTAMAVAGVGSVDTIVGIGDQAHAKVGFQSPYEASVTVPYWGARNELIELIDLAHAGIFDISVETFSLDNGAEAYRR  
LAAGTLSGRAVVVPGLEHHHHHH

In preliminary work, P450<sub>LA1</sub> was cloned into a pET22b(+) vector containing a C-terminal 6×His-tag.<sup>69</sup> Gene and amino acid sequence of cytochrome P450<sub>LA1</sub> monooxygenase (Uniprot ID: A0P0F6) as well as P7 and anti-Markovnikov oxygenase (aMOx) are given:

### **P450<sub>LA1</sub>**

**ATG**GAACGCACTGCAAATCCAGCGGACGTTCCGGCTGGTGGTAAATCTTCTGAAGGCAAGGCGGGTACTCCACCGGCTGCTGA  
AGCTCAATGCCCTTTCAGCAAAATGGCAGCAGATTTTCGACGCTTTTCGACGGCCATATCAGGCTGATCCGGCAGAAGCGCTGC  
GTTGGTCTCGTGACCAGCTGCCGGTTTTCTATTCCCGAACCTGGGTTACTGGGTGGTTTTCTCGTTACGATGATATCAAAGCT  
GTTTTTCGTGACAACATCCTGTTTCAGCCCGCTAACGCTCTGAAAAAATTACTCCGGCAACCCCGGAAGCGATGGAGGTCTC  
GAAAGGTTATGGTTACGCAATGAACCGTACCATGGTTAACGAAGACGAACCAGTTCACATGGAACGTCGTCGTGCACTGATGG  
GCCACTTCTGCCGACAATCTGGAAGCTCGTCAGGAGATGGTACGCCCGCTGACCCGCGAAAAAATCGATGCATTTCATCGAT  
TCCGGTCGCGTGGATCTGGTGAAGCCATGCTGTATGAGGTTCCGCTGAACGTTGCTCTGCACCTTCTGGGCGTTCCGGAGGA  
TGACATTGCCATTCTGAAAACTTTTTCTGTGCGCACACAGCGTCAACACCTGGGGTAAACCGACCGATGAGCAGCAGGTTGCGA  
TCGACACAGCAGTGGTTCAGTTCGGAACATGCTGGTAAAATCATCGAAAAAATGCGCAAGGAACCGGACCGTACCAGTTGG  
ATGCACGAAACCATCCGTAAAAACGCAGAAATGCCGGATATTGTTCCGGATTCTTATGTTCACTCCATGATGATGGCGATCAT  
CGTTGCGGCACACGAGACCACCGCTGGCCTCTGCAGGTATGTTTTAAAACCTGCTGACTCACCGTCAGGCTTGGCAGGATA  
TCTGCGAGGACCCGTCCTGATTCCGAACGCAGTTGAGGAGTGTCTGCGTTATAGCGGCTCCATCGTGGCATGGCGTCGTCAA  
GCTACGGCTGCCACCCGATCCGGTGGTGTGACATCCCGGAAGGTGCTAAACTGCTGATCGTTCAAGCATCTGGTAATCAGGA  
TGAGCGTCACTTCGAGGATGGTGACAAATTTGACATCTACCGGATAACCGCGTGGACCACCTGACCTTTGGCTACGGTTCTC  
ATCAGTGTATGGGCAAAACATTGCCCGTATGGAGATGCGCATCTTCTGGAAGAAATGACTCGTCGCTGCCTCACCTGCAA  
CTGGCGGAACAGGAATCACTTACCTGTCCAACACCAGCTTTCGTGGTCCGGATCATGTGTGGGTGCAATGGGATCCGGAAAA  
AAACCTGAACGTGCCGATCCGAGCCTGGCTAACCGCAACCACCGTTTTCCAGTTGGTGCCCCAGCCCGCGTATATTGCAC  
GTAATAATTCGCATCAAACCTGTTCTGTCGTGAAGCCGACGGCATCTGGGCTGACCATTGAGGATGCAAAGGGTGGTCTCTG  
CCACGTTGGTCCGCTGGTGGCAGATCGAAGTGTGTGTTGACGGCTTCGACCGTAAATATTCCTGTGTGGTGGTGGGACTC  
CCGTGACTATGATATCGCAGTTCGTGGAAGAAGGCGGTGCGGGTGGTAGCCGTCGATTCACGAAGTGGCTGCCGAGGGCC  
TGGAGCTGCGCCTGCGTGGTCTTAACTGTTCCGCTGGACGAACAGGCGGCTTCCATGTTCTGATTGCGGGTGGCATT  
GGTATCACCCGATCCTGGCAATGGCGGACCACCTGAAAGCCCTGGGTCGTGACTACACCATCCACTACTGCGGTGTTCTCG  
TCGTTCTATGGCATTCTGGACCGTCTGCAGGCAGACCATGGCGAGCGTCTGTCTGTGCATGCTGGCGATGAGAACCCTCACG  
CCGAGCTGGCTGGTATTGTTGCCTCCCTGCCGGAAGGTGGCCAGATTTACGCATGTGGTCCGGAACGTATGATCAGCGAGCTG  
GAAGATCTGACCGCCCGTCTGCCACATGGCACCCCTGCATTTTCGAGCACTTCAGCGCTCAGGAACTGCCCTGGACCCGCTAA  
AGAAAACGCATTCCAGGTAGAACTGAAAGATTCCGGTCTGACTCTGGAGGTGGCTGCGAACGTTACCTGCTGGATGCACTGC  
TGGCGTCTGGTATCGATATCTTGTGACTGCCGTGAAGGCCTGTGTGGCTCTTGCAGGTTAGAAGTCTGGAGGGCGAGATC  
GACCACCGCAGCTGGTACTGACTCGCACCGAACGTCGGGAAAACCGTCGCATGATGTCTTGCTGTTCCCGCTCTGTAAGG  
CGGTAAGCTGAAACTGGCACTGCTCGAGCACCACCACCACCAC**TGA**

MERTANPADVPAGGKSSEKAGTPPAEAEQCPFSKMAADFDAFAGPYQADPAEALRWSRDQLPVFYS PNLGYWVVSRYDDIKA  
VFRDNILFSPRNAMELEKI TPATPEAMEVLKGYGYAMNRTMVNEDEPVHMERRRALMGHFLPDNLEARQEMVRRRLTREKIDAFID  
SGRVDLVEAMLYEVLNVALHFLGVPEDDIAILKNFVAHSVNTWGKPTDEQQVAIAHDVGVQFVNYAGKIEKMRKEPDGTGW  
MHETIRKNAEMPDI V PDSYVHSMMAI I VAAHETTS LASAGMFKLLTHRQAWQDICEPSLI PNAVEECLRYSGSIVAWRRQ  
ATAATRIGGVDIPEGAKLLIVQASGNQDERHFEDGDKFDIYRDNVADHLTFGYGSHQCMGKNIARMEMRIFLEEMTRRLPHLQ  
LAEQEFYTLNNTSFRGPDHVWVEWDEKKNPERADPSLANGNHRFPVGA PARRDIARKIRIKTVRREADGILGLTIEDAKGRSL  
PRWSAGAHIEVCVDGFRKYS LCGRADSRDYDIAVLL EEGGRGSRRIHEVAAEGLELRLRGPSNLFRLEQARSYVLIAGGI  
GITPILAMADHLKALGRDYTIHYCGRSRRSMAFLDRLQADHGERLSVHAGDENRHAELAGIVASLPEGGQIYACGPERMISEL  
EDLTARLPHGTLHFEHFSAQETALDPSKENAFQVELKDSGLTLEVAANVTLLDALLASGIDISCDCREGLCGSCEVEVLEGEI  
DHRDVVLRTERAENRRMSSCSRSVKGKLLKLLALLEHHHHHH

## P450<sub>LA1</sub>-P7

ATGGAACGCACTGCCAAATCCAGCGGACGTTCCGGCTGGTGGTAAATCTTCTGAAGGCAAGGCGGGTACTCCACCGGCTGCTGA  
AGCTCAATGCCCTTTTCAGCAAAATGGCAGCAGATTTTCGACGCTTTTCGACGGCCATATCAGGCTGATCCGGCAGAAGCGCTGC  
GTTGGTCTCGTGACCAGCTGCCGGTTTTCTATTCCCCGAACCTGGGTACTGGGTGGTTTTCTCGTTACGATGATATCAAAGCT  
GTTTTTCGTGACAACATCCTGTTTCAGCCCGCTAACGCTCTGGAAAAAATTACTCCGGCAACCCCGGAAGCGATGGAGGTCCT  
GAAAGGTTATGGTTACGCAATGAACCGTGCCATGGTTAACGAAGACGAACCAGTTCACATGGAACGTCGTCGTGCACTGATGG  
GCCACTTCTGCCGACAATCTGGAAGCTCGTCAGGAGATGGTACGCCCGCTGACCCGCGAAAAAATCGATGCATTTCATCGAT  
TCCGGTCGCGTGGATCTGGTGAAGCCATGCTGTATGAGGTTCCGCTGAACGTTGCTCTGCACCTTCTGGCGGTTCCGGAGGA  
TGACATTGCCATTCTGAAAAAGTTTTCTGTGCGCACACAGCGTCAGCACCTGGGGTAAACCGACCGATGAGCAGCAGGTTGCGA  
TCGACACAGACGTTGGTTCAGTTCGGAACATATGCTGGTAAAATCATCGAAAAAATGCGCAAGGAACCGGACGGTACCGGTTGG  
ATGCACGAAACCATCCGTAAAAACGCAGAAATGCCGGATATTGTTCCGATTCTTATGTTCACTCCATGATGATGGCGATCAT  
CGTTGCCGACACGAGACCACCAGCTGCGCTCTGCAGGTATGTTTTAAACCTGCTGACTCACCGTCAGGCTTGGCAGGATA  
TCTGCGAGGACCCGTCCTGATTCCGAACGCAGTTGAGGAGTGTCTGCGTTATAGCGGCTCCATCGTGGCATGGCGTCGTCAA  
GCTACGGCTGCCACCGTATCGGTGGTGTGACATCCCGGAAGGTGCTAAACTGCTGATCGTTCAAGCATCTGGTAATCAGGA  
TGAGCGTCACTTCGAGGATGGTGACAAATTTGACATCTACCGCGATAACGCGGTGGACCACCTGACCTTTGGCCACGGTTCTC  
ATCAGTGTATGGGCAAAACATTGCCCGTATGGAGATGCGCATCTTCTGGAAGAAATGACTCGTCGCTGCCTCACCTGCAA  
CTGGCGGGACAGGAATCACTTACCTGTCCAACACCAGCTTTCGTGGTCCGGATCATGTGTGGGTGCAATGGGATCCGGAAAA  
AAACCTGAACGTGCCGATCCGAGCCTGGCTAACGGCAACCACCGTTTTCCAGTTGGTGGCCAGCCCGCGCTGATATTGCAC  
GTAATAATTCGCATCAAACTGTTTCGTGCGTGAAGCCGACGGCATCTGGGCTGACCATTGAGGATGCAAAGGGTCGTTCTCTG  
CCACGTTGGTCCGCTGGTGGCAGATCGAAGTGTGTGTTGACGGCTTCGACCGTAAATATCCCTGTGTGGTGGTGGGACTC  
CCGTGACTATGATATCGCAGTTCGCTGGAAGAAGGCGGTGCGGTTGGTAGCCGTCGTATTCACGAAGTGGCTGCCGAGGGCC  
TGGAGCTGCGCCTGCGTGGTCTTAACTGTTCCGCTGGACGAACAGGCGGCTTCCATGTTCTGATTGCGGGTGGCATT  
GGTATCACCCGATCCTGGCAATGGCGGACCACCTGAAAGCCCTGGGTCGTGACTACACCATCCACTACTGCGGTCGTTCTCG  
TCGTTCTATGGCATTCTGGACCGTCTGCAGGACAGCCATGGCGAGCGTCTGTCTGTGCATGCTGGCGATGAGAACCCTCACG  
CCGAGCTGGCTGGTATTGTTGCCTCCCTGCCGGAAGGTGGCCAGATTTACGCATGTGGTCCGGAACGTATGATCAGCGAGCTG  
GAAGATCTGACCGCCGCTGTCACATGGCACCTGCATTTTCGAGCACTTCAGCGCTCAGGAAACTGCCCTGGACCCGCTAA  
AGAAAACGCATTCCAGGTAGAACTGAAAGATTCCGGTCTGACTCTGGAGGTGGCTGCGAACGTTACCTGCTGGATGCACTGC  
TGGCGTCTGGTATCGATATCTTGTGACTGCCGTGAAGGCCTGTGTGGCTCTTGCAGGTTAGAAGTCTGGAGGGCGAGATC  
GACCACCGCGACGTGGTACTGACTCGCACCGAACGTCGGGAAAACCGTCGCATGATGTCTTGCTGTTCCCGCTCTGTAAAAGG  
CGGTAAGCTGAAACTGGCACTGCTCGAGCACCACCACCACCACCTGA

MERTANPADVPAGGKSSEKAGTPPAEAEQCPFSKMAADFDAFAGPYQADPAEALRWSRDQLPVFYS PNLGYWVVSRYDDIKA  
VFRDNILFSPRNALEKITPATPEAMEVLKGYGYAMNRA MVNEDEPVHMERRRALMGHFLPDNLEARQEMVRRRLTREKIDAFID  
SGRVDLVEAMLYEVP LNVALHFLGVPEDDIAILK KFSVAHSVSTWKGKPTDEQQVAIAHDVGVQFWNYAGKIEKMRKEPDGTGW  
MHETIRKNAEMPDI V PDSYVHSMMAI I VAAHETTS LASAGMFKLLTHRQAWQDICE D PSLIPNAVEECLRYSGSIVAWRRQ  
ATAATRIGGVDIPEGAKLLIVQASGNQDERHFEDGDKFDIYRDNVNDHLTFHG H GSHQCMGKNIARMEMRIFLEEMTRRLPHLQ  
LAGQEFTYLSNTSFRGPDHVWVEWDEKKNPERADPSLANGNHRFPV G APARRDIARKIRIKTVRREADGILGLTIEDAKGRSL  
PRWSAGAHIEVCVDGFD RKYS LCGRADSRDYDIAVLL E EGGRRGSRRIHEVAAEGLELRLRGPSNLFRLEDEQARSYVLIAGGI  
GITPILAMADHLKALGRDYTIHYCGRSRRSMAFLDRLQADHGERLSVHAGDENRHAELAGIVASLPEGGQIYACGPERMISEL  
EDLTARLPHGTLHFEHFSAQETALDPSKENAFQVELKDSGLTLEVAANVTLLDALLASGIDISCDCREGLCGSCEVEVLEGEI  
DHRDVVLRTERAENRRMSSCSRSVKGGKLLALLEHHHHHH

P450<sub>LA1</sub>-P7 has the following mutations compared to P450<sub>LA1</sub>: T121A, N201K, N209S, Y385H, E418G

## aMOx

ATGGAGCGCACTGCAAATCCAGCGGACGTTCCGGCTGGTGGTAAATCTTCTGAAGGCAAGGCGGGTACTCCACCGCTGTGA  
AGCTCAATGCCCTTTCAGCAAAATGGCAGCAGATTTTCGACGCTTTTCGACGGCCATATCAGGCTGATCCGGCAGAAGCGCTGC  
GTTGGTCTCGTGACCAGCTGCCGGTTTTCTATTCCCGAACCTGGGTACTGGGTGGTTTTCTCGTTACGATGATATCAAAGCT  
GTTTTTCGTGACAACATCCTGTTTCAGCCCGCTAACGCTCTGGAAAAATCACTCCGCTGACCCCGGAAGCGATGGAGGTCTC  
GAAAGGTTATGGTTACGCACTGAACCATGCCATGATTAACGAAGACGAACAGTTCACATGGAACGTCGTCGTGCACTGATGG  
GCCACTTCTGCCGACAATCTGGAAGCTCGTCAGGAGATGGTACGCCGCTGACCCGCGAAAAAATCGATGCATTTCATCGAT  
TCCGGTCGCGTGGATCTGGTGAAGCCATGCTGTATGAGGTTCCACTGAACGTTGCCCTGCACTTCTGGCGGTTCCGGAGGA  
TGACATTGCCATTCTGAAAAAGTTTTCTGTGCGCACACAGCGTCAGCACCTGGGGTAAACCGACCGATGAGCAGCAGGTTGCGA  
TCGACACAGACGTTGGTTCAGTTCTGGAACATATGCTGGTAAAATCATCGAAAAAATGCGCAAGGAACCGGACGGTACCGGTTGG  
ATGCACGAAACCATCCGTAAAAACGCAGAAATGCCGGATATTGTCCCGATTCTTATGTTCACTCCATGATGATGGCGATCAT  
CGTTGCCGACACGAGACCACCGCTGCCCTCTGCAGGTATGTTTTAAACCTGCTGACTCACCGTCAGGCTTGGCAGGATA  
TCTGCGAGGACCCGCTCTGTGATTCCGAACGCAGTTGAGGAGTGTCTGCGTTATAGCGGCTCCGTTATGGCATGGCGTCGTC  
GCTACGGCTGCCACCGTATCGGTGGTGTGACATCCCGGAAGGTGCTAAACTGCTGATCGTTCAAGCATCTGGTAATCAGGA  
TGAGCGTCACTTCGAGGATGGTGACAAATTTGACATCTACCGCGATAACCGGTTGGACCACCTGACCTTTGGCGTGGGTTCTC  
ACCACTGTCTGGGCAAAAACATTGCCCGTATGGAGATGCGCATCTTCTGGAAGAAATGACTCGTCGCTGCCTCACCTGCAA  
CTGGCGGGACAGGAATCACTTACCTGTCCAACACCAGCTTTCGTGGTCCGGATCATGTGTGGGTGCAATGGGATCCGGAAAA  
AAACCTGAACGTGCCGATCCGAGCCTGGCTAACGGCAACCACCGTTTTCCAGTTGGTGGCCAGCCCGCGCTGATATTGCAC  
GTAATAATTCGCATCAAACTGTTTCGTGCGTGAAGCCGACGGCATCTGGGCTGACCATTGAGGATGCAAAGGGTCTTCTCTG  
CCACGTTGGTCCGCTGGTGGCAGATCGAAGTGTGTGTTGACGGCTTCGACCGTAAATATCCCTGTGTGGTGGTGGGACTC  
CCGTGACTATGATATCGCAGTTCGTGGAAGAAGGCGGTGCGGTTGGTAGCCGTCGTATTACGAAGTGGCTGCCGAGGGCC  
TGGAGCTGCGCCTGCGTGGTCTTAACTGTTCCGCTGGACGAACAGGCGGTTCCATGTTCTGATTGGGGTGGCATT  
GGTATCACCCGATCTGGCAATGGCGGACCACCTGAAAGCCCTGGGTCGTGACTACACCATCCACTACTGCGGTCGTTCTCG  
TCGTTCTATGGCATTCTGGACCGTCTGCAGGACAGCATGGCGAGCGTCTGTCTGTGATGCTGGCGATGAGAACCCTCAG  
CCGAGCTGGCTGGTATTGTTGCCTCCCTGCCGGAAGGTGGCCAGATTTACGCATGTGGTCCGGAACGTATGATCAGCGAGCTG  
GAAGATCTGACCGCCGCTGTCACATGGCACCTGCATTTTCGAGCACTTCAGCGCTCAGGAAACTGCCCTGGACCCGCTAA  
AGAAAACGCATTCCAGGTAGAACTGAAAGAT  
TCCGGTCTGACTCTGGAGGTGGCTGCGAACGTTACCCTGCTGGATGCACTGCTGGCGTCTGGTATCGATATCTCTTGTGACTG  
CCGTGAAGGCCTGTGTGGCTCTTGCAGGTTAGAAGTCTGGAGGGCGAGATCGACCACCGCGACGTGGTACTGACTCGCACCG  
AACGTGCGGAAAACCGTGCATGATGCTTTGCTGTTCCCGCTCTGTAAGGCGGTAAGCTGAAACTGGCACTGCTCGAGCAC  
CACCACCACCACCTGA

MERTANPADVPAGGKSSEKAGTPPAEAEQCPFSKMAADFDAFAGPYQADPAEALRWSRDQLPVFYSPLNGYWVVSRYDDIKA  
VFRDNILFSPRNLAKITPLTPEAMEVLKGYGYALNHAMINEDEPVHMERRRRLMGHFLPDNLEARQEMVRRRLTREKIDAFID  
SGRVDLVEAMLYEVLNVALHFLGVPEDDIAILKRFVSAHSVSTWKGKPTDEQQVAIAHDVGVQFWNYAGKIEKMRKEPDGTGW  
MHETIRKNAEMPDI VPDSYVHSMMAIIVAHEHTTSLASAGMFKLLTHRQAWQDICEPSLIPNAVEECLRYSGSVMAWRRQ  
ATAATRIGGVDIPEGAKLLIVQASGNQDERHFEDGDKFDIYRDNVADHLTFVGVSHQCLGKNIARMEMRIFLEEMTRRLPHLQ  
LAGQEFTYLSNTSFRGPDHVVEWDPEKNPERADPSLANGNHRFPVGAAPARRDIARKIRIKTVRREADGILGLTIEDAKGRSL  
PRWSAGAHIEVCVDGFRKYSLGRADSRDYDIAVLLLEEGRRGSRRIHEVAAEGLELRLRGPSNLFRLEQARSYVLIAGGI  
GITPILAMADHLKALGRDYTIHYCGRSRRSMAFLDRLQADHGERLSVHAGDENRHAELAGIVASLPEGGQIYACGPERMISEL  
EDLTARLPHGTLHFEHFSAQETALDPSKENAFQVELKDSGLTLEVAANVTLLDALLASGIDISDCDREGLCGSEVEVLEGEI  
DHRDVVLRTERAENRRMSSCSRSVKGKLLKLLALLEHHHHHH

aMOx has the following mutations compared to P450<sub>LA1</sub>: A103L, M118L, R120H, T121A, V123I, N201K, N209S, I326V, V327M, Y385V, M391L, E418G

## II. General procedures

### (A) Large scale expression of P450 variants and PAR-ADH

*E. coli* BL21(DE3) cells were transformed with plasmid DNA encoding P450 variants or PAR-ADH and grown overnight in 5 mL LB medium (100  $\mu\text{g mL}^{-1}$  ampicillin final concentration) at 37°C, 180 rpm. Expression cultures were inoculated with 4 mL of preculture into 400 mL TB medium (100  $\mu\text{g mL}^{-1}$  ampicillin final concentration) in a 2 L flask with baffles and incubated for 2 – 3 h at 37°C and 100 rpm until an  $\text{OD}_{600} = 0.6 - 0.8$  was reached. The flask was cooled on ice for 10 min before expression was induced (0.2 mM IPTG, final concentration). In addition, aminolaevulinic acid (0.5 mM, final concentration) was added for the expression of P450 variants. Induced cells were shaken for 20 h at 25°C, 100 rpm. The cells were harvested (3220 $\times$ g, 10 min, 4°C) and stored at -20°C.

### (B) Expression of P450<sub>LA1</sub> variants in 24-deepwell plates

The expression of P450 variants was also carried out in 24-deepwell plates for easier handling. Individual *E. coli* BL21(DE3) transformants containing plasmid DNA encoding P450 variants were cultivated in 4 mL/well of TB medium (100  $\mu\text{g mL}^{-1}$  ampicillin, final concentration) for 20 h at 37°C, 250 rpm using humidity control. Expression cultures were inoculated with 300  $\mu\text{L}$  of preculture into 3.6 mL of TB medium (100  $\mu\text{g mL}^{-1}$  ampicillin, final concentration). The cultures were incubated for 4 h at 37°C, 250 rpm, then cooled on ice for 10 min before induction with induction master mix (100  $\mu\text{L}$ , 0.2 mM IPTG, 0.5 mM aminolaevulinic acid, final concentration). Induced cells were shaken for 20 h at 25°C, 250 rpm using humidity control. The cells were harvested (3220 $\times$ g, 10 min, 4°C) and stored at -20°C for three days.

### (C) Biotransformations

Styrene or isotopically labeled  $\beta$ -*d*-styrene was converted in an enzyme cascade employing the P450 variant together with an alcohol dehydrogenase (PAR-ADH) to convert styrene directly to 2-phenylethanol and for cofactor regeneration. Since aldehydes are prone to side reactions in buffered systems, we chose to prevent aldehyde accumulation by direct reduction to the corresponding alcohol with an alcohol dehydrogenase. *E. coli* BL21(DE3) cells were lysed with lysis buffer (3 mL/g wet cell pellet, 0.1 M  $\text{NaH}_2\text{PO}_4$ , pH 8.0, 0.15 M NaCl, 2% glycerol by weight, 1.0 mg/mL lysozyme, 0.2 mg/mL DNase I) for 4 h on ice followed by centrifugation (10 min, 20238 $\times$ g, 4°C). The supernatant was used as lysate in biotransformations. For biotransformations, 100  $\mu\text{L}$  of lysate were mixed with 584  $\mu\text{L}$  NADH buffer solution (0.1 M  $\text{NaH}_2\text{PO}_4$ , pH 8.0, 0.15 M NaCl, 2% glycerol by weight, 5 mM NADH, final concentration) and 100  $\mu\text{L}$  PAR-ADH lysate (prepared following the identical lysing protocol as described above) and 1% isopropanol for NADH cofactor regeneration. To start the reaction, 16  $\mu\text{L}$  substrate stock in 1:1 DMSO/isopropanol (5 mM final substrate concentration, 1% isopropanol

for cofactor regeneration) were added in 2 mL screw-top glass vials. The biotransformation was stopped and extracted with 800  $\mu$ L MTBE. The organic phase was analyzed using GC-MS or chiral GC.

Note: Instead of lysate, purified P450 enzyme (as prepared in chapter (D)) can also be used for biotransformations. A final enzyme concentration of 2 – 5  $\mu$ M was typically used.

#### **(D) ÄKTA purification of P450 variants**

*E. coli* BL21(DE3) cells were lysed with lysis buffer (3 mL/g wet cell pellet, 0.05 M TRIS, pH 8.0, 0.05 M NaCl, 10% glycerol by weight, 10 mM imidazole, 1.0 mg/mL lysozyme, 0.2 mg/mL DNase I) for 4 h on ice using a Dounce homogenizer followed by centrifugation (35 min, 20,000 $\times$ g, 4°C). The supernatant was filtered using a syringe filter (0.45  $\mu$ m pore size, PES) before loading the IMAC column. The protein (containing a C-terminal 6 $\times$ His-tag) was purified by loading the lysate on a nickel NTA column (5 mL HisTrap HP, GE Healthcare, Piscataway, NJ) using an ÄKTA purifier. The column was washed with 5 column volumes buffer A (0.05 M TRIS, pH 8.0, 0.05 M NaCl, 10% glycerol by weight, 10 mM imidazole) and the protein was eluted using a linear gradient from 100% buffer A to 100% buffer B (0.05 M TRIS, pH 8.0, 0.05 M NaCl, 10% glycerol by weight, 250 mM imidazole) over 7.5 column volumes. The combined fractions were dialyzed (2 L overnight, 2 L for 4 h, 0.05 M TRIS, pH 8.0, 0.05 M NaCl, 10% glycerol by weight, MWCO = 6 - 8 kDa) after purification. 200  $\mu$ L aliquots were frozen using liquid nitrogen and stored at -20°C. The concentration of purified P450 enzymes was determined from ferrous carbon monoxide binding difference spectra using a previously reported protocol.<sup>70</sup>

#### **(E) Determination of dissociation constants**

A solution of styrene in DMSO (1  $\mu$ L) was added to a buffered solution of purified P450<sub>LA1</sub> or aMOx (199  $\mu$ L, 1  $\mu$ M final concentration in 0.05 M TRIS, pH 8.0, 0.05 M NaCl, 10% glycerol by weight) to reach the following final concentrations: 0, 50, 100, 250, 500 and 1000  $\mu$ M. UV/Vis spectra were recorded from 325 to 525 nm in 1 nm increments before and after addition of substrate and the difference spectra were determined by subtracting the enzyme reference spectra from the substrate-bound spectra. The absorbance differences between  $\lambda_{\max}$  and  $\lambda_{\min}$  were calculated and plotted against the substrate concentrations. The dissociation constants were determined by fitting the data to a binding isotherm model using the following formula:

$$\Delta Abs = ([styrene] \times \Delta Abs_{max}) / ([styrene] + K_d).$$

### **(F) Determination of kinetic parameters**

For the determination of initial velocities, 100  $\mu\text{L}$  of purified P450<sub>LA1</sub> (5.2 - 5.8  $\mu\text{M}$ ) or aMOx (2.3 - 2.4  $\mu\text{M}$ ) were mixed with 584  $\mu\text{L}$  NADH buffer solution (0.1 M NaH<sub>2</sub>PO<sub>4</sub>, pH 8.0, 0.15 M NaCl, 2% glycerol by weight, 5 mM NADH, final concentration) and 100  $\mu\text{L}$  PAR-ADH lysate (60 U/mL). To start the reaction, 16  $\mu\text{L}$  styrene stock solution in 1:1 DMSO/isopropanol were added to reach the following final substrate concentrations: 50, 100, 250, 500, 750, 1000, 1500 and 2000  $\mu\text{M}$ . The biotransformations were stopped after 0, 10, 15 and 60 minutes by extracting with 800  $\mu\text{L}$  MTBE (containing 100  $\mu\text{M}$  3-phenylpropanol as internal standard). Each reaction was typically performed in duplicates. The organic phase was analyzed using GC-MS. The determined initial velocities were plotted against the substrate concentrations and the kinetic parameters were determined by fitting the data to the Michaelis-Menten equation.

### **(G) NADH consumption and H<sub>2</sub>O<sub>2</sub> formation**

To compare the NADH consumption and peroxide formation to product formation, 100  $\mu\text{L}$  of purified P450<sub>LA1</sub> (4.5  $\mu\text{M}$ ) or aMOx (2.5  $\mu\text{M}$ ) were mixed with 29  $\mu\text{L}$  NADH buffer solution (0.1 M NaH<sub>2</sub>PO<sub>4</sub>, pH 8.0, 0.15 M NaCl, 2% glycerol by weight, 250  $\mu\text{M}$  NADH, final concentration) and either 655  $\mu\text{L}$  lysis buffer (0.1 M NaH<sub>2</sub>PO<sub>4</sub>, pH 8.0, 0.15 M NaCl, 2% glycerol by weight) or 555  $\mu\text{L}$  lysis buffer and 100  $\mu\text{L}$  PAR-ADH lysate (60 U/mL). The reactions were started by adding 16  $\mu\text{L}$  styrene stock solution (12.5 mM in 1:1 DMSO:isopropanol). After 15 minutes the absorption at 340 nm was measured to determine NADH consumption. 50  $\mu\text{L}$  of the same reaction was used to determine the peroxide concentration using the Pierce<sup>TM</sup> quantitative peroxide assay kit (Thermo Fisher). The other reaction was stopped by extracting with 800  $\mu\text{L}$  MTBE (containing 100  $\mu\text{M}$  3-phenylpropanol as internal standard) and the organic phase was analyzed using GC-MS.

### III. Chemical synthesis of *d*-labeled styrenes

#### Reaction:

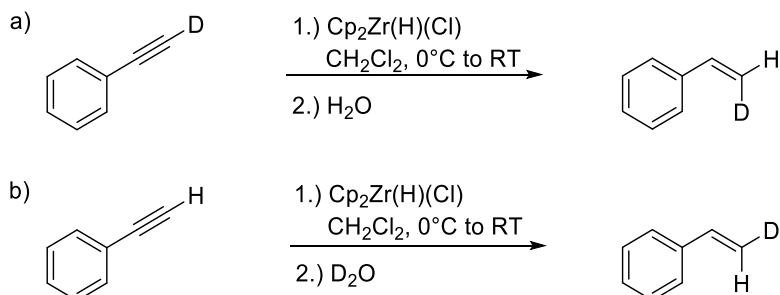

**Scheme S1:** Synthesis of a) *cis*-styrene- $\beta$ -*d* and b) *trans*-styrene- $\beta$ -*d* by hydrozirconation/hydrolysis according to literature.<sup>71,72</sup>

Under a nitrogen atmosphere, zirconocene hydrochloride (2.09 g, 7.7 mmol) was added in two equal portions to a solution of anhydrous dichloromethane (20 mL) and cooled to 0°C. After the addition of a) phenylacetylene-*d*<sub>1</sub> (784  $\mu$ L, 7.0 mmol) or b) phenylacetylene (784  $\mu$ L, 7.0 mmol), the reaction mixtures were kept in the dark, slowly warmed up to room temperature and stirred for 2 h. Either a) H<sub>2</sub>O (1.0 mL) or b) D<sub>2</sub>O (1.0 mL) was added and the reaction mixtures were stirred for further 2 h. The resulting mixtures were dried using MgSO<sub>4</sub>, filtered and concentrated *in vacuo* to ca. 5 mL each (rotary evaporator without heating). Pentane (10 mL) was added and the resulting suspensions were passed through a pad of silica using pentane as eluent. The filtrate was concentrated *in vacuo* (rotary evaporator without heating) and distilled using a bulb to bulb distillation. Product fractions for both a) *cis*-styrene- $\beta$ -*d* and b) *trans*-styrene- $\beta$ -*d* were isolated as colorless liquid (ca. 200  $\mu$ L each) showing >95% *d*-incorporation and 2 - 3% residual pentane from NMR analysis.

#### a) *cis*-Styrene- $\beta$ -*d*

<sup>1</sup>H NMR (500 MHz, CDCl<sub>3</sub>)  $\delta$  = 7.42–7.40 (m, 2H), 7.34–7.30 (m, 2H), 7.26–7.24 (m, 1H), 6.72 (dt, *J* = 10.8 Hz, 2.6 Hz, 1H), 5.22 (d, *J* = 11.0 Hz, 1H) ppm.

<sup>13</sup>C NMR (125 MHz, CDCl<sub>3</sub>)  $\delta$  = 137.6, 136.8, 128.5, 127.8, 126.2, 113.5 (t, *J* = 23.6 Hz) ppm.

GC-MS *m/z*: 105, 104, 79, 78.

#### b) *trans*-Styrene- $\beta$ -*d*

<sup>1</sup>H NMR (500 MHz, CDCl<sub>3</sub>)  $\delta$  = 7.42–7.40 (m, 2H), 7.34–7.30 (m, 2H), 7.26–7.24 (m, 1H), 6.71 (d, *J* = 17.6 Hz, 1H), 5.73 (d, *J* = 17.6 Hz, 1H) ppm.

<sup>13</sup>C NMR (125 MHz, CDCl<sub>3</sub>)  $\delta$  = 137.6, 136.8, 128.5, 127.8, 126.2, 113.5 (t, *J* = 24.6 Hz) ppm.

GC-MS *m/z*: 105, 104, 79, 78.



# <sup>1</sup>H NMR spectra:

## *cis*-Styrene-β-*d* (residue fraction)

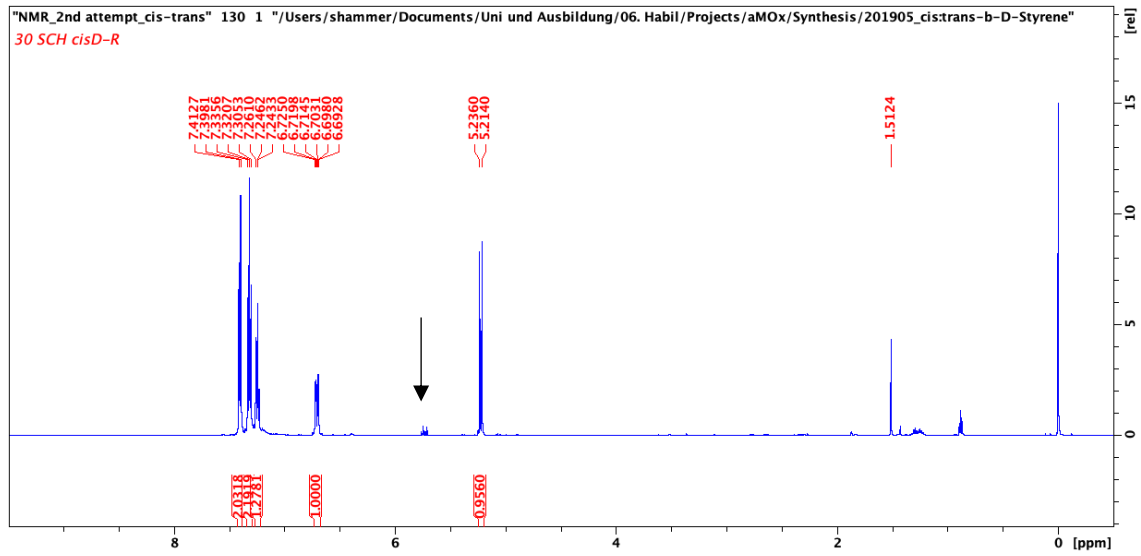

## *trans*-Styrene-β-*d* (fraction 3)

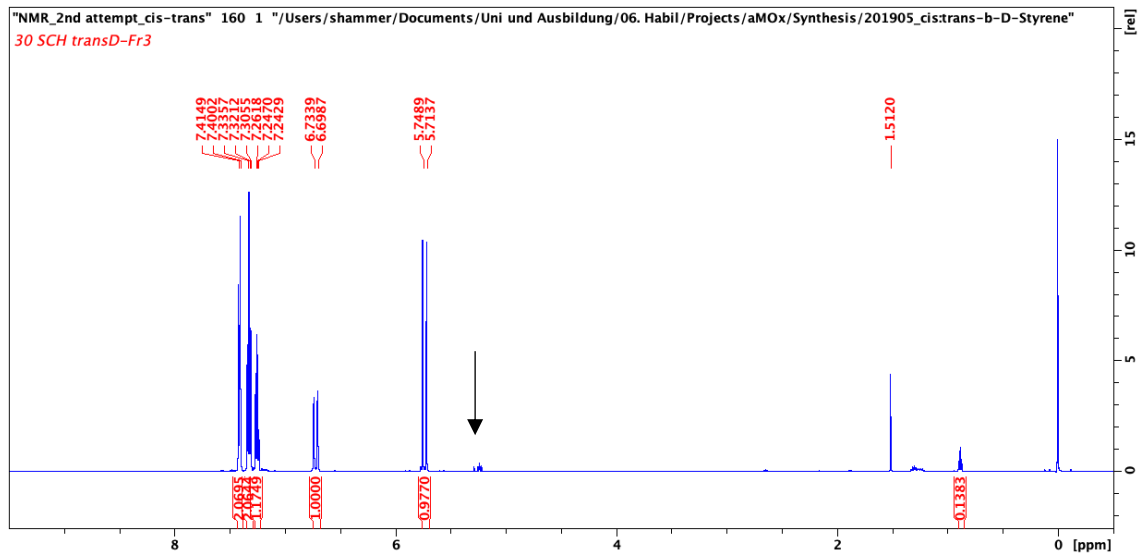

## Styrene (commercial)

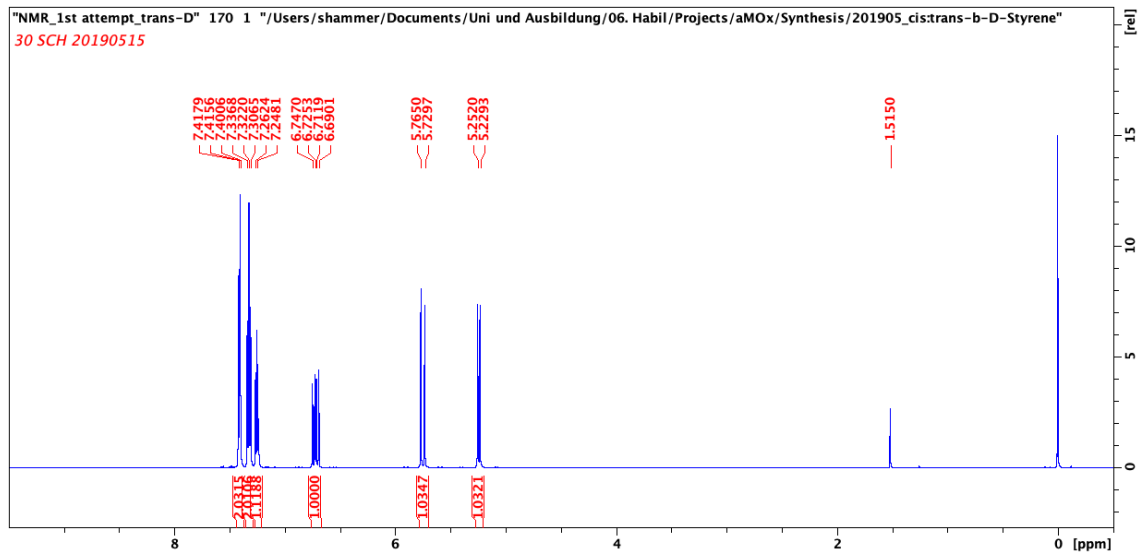

### <sup>13</sup>C NMR spectra:

#### *cis*-Styrene-β-*d* (residue fraction)

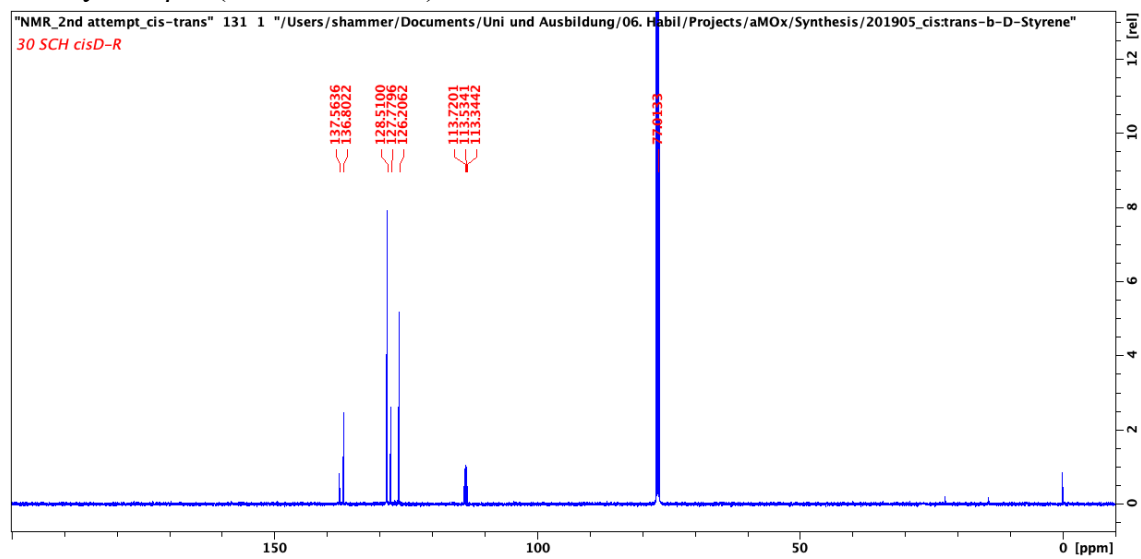

#### *trans*-Styrene-β-*d* (fraction 3)

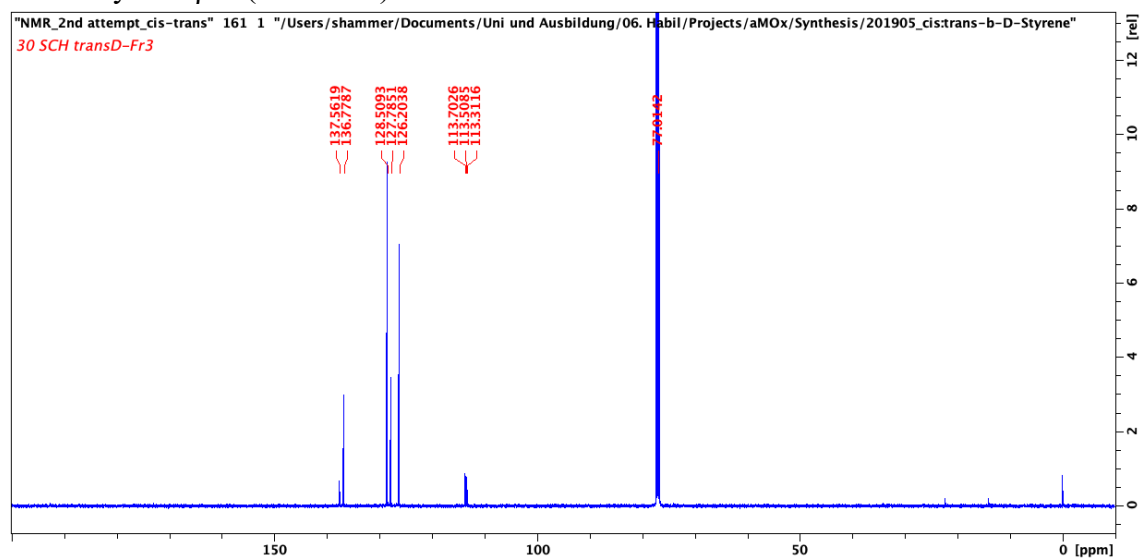

#### Styrene (commercial)

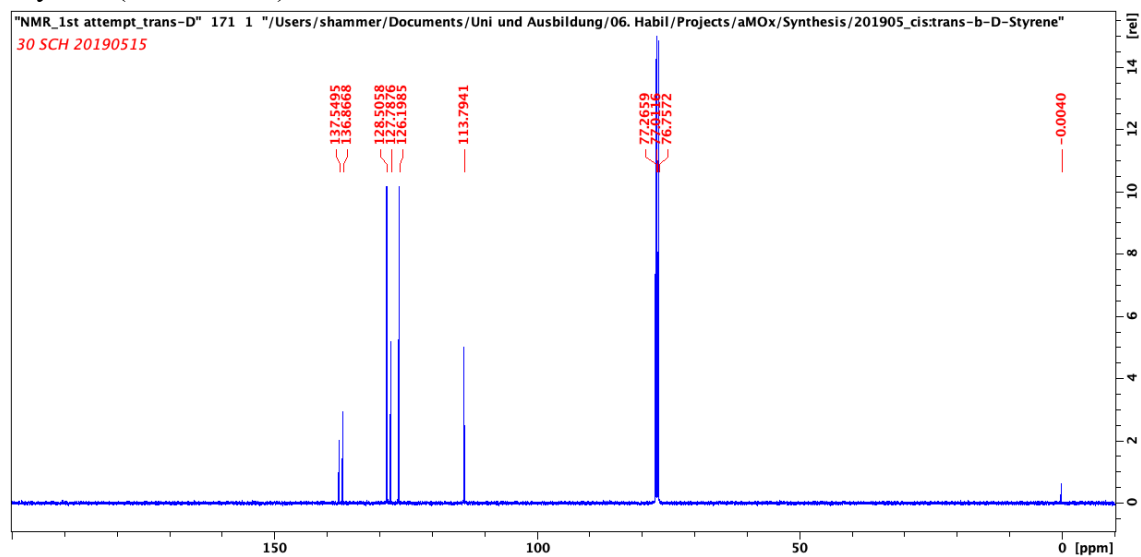

#### IV. Determination of the migration tendency (*cis* vs. *trans*)

**Question:** Does aMOx differentiate between these enantiotopic hydrogen atoms (blue)?

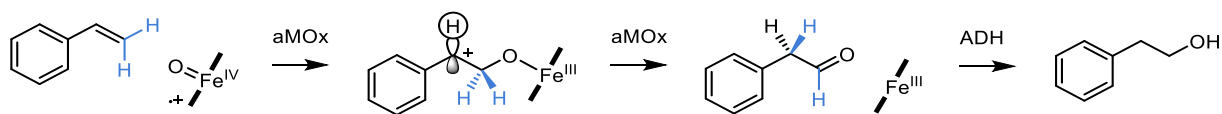

**Approach:** Conversion of isotopically labeled substrates (*cis*-styrene- $\beta$ -*d* and *trans*-styrene- $\beta$ -*d*) and MS-analysis of the reduced products. The fragmentation pattern provides information about the deuteride migration to the neighboring (benzylic) carbon atom.

**Figure S30:** Rationale behind the experiment of using MS fragmentation patterns to determine the position of the deuterium in the resulting product. An increase in mass ( $m/z = +1$ ) for the benzylic cleavage and McLafferty rearrangement fragments provides information about the deuteride migration.

#### Bioconversion of unlabeled styrene:

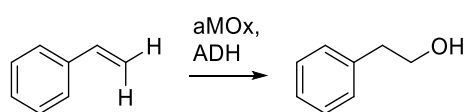

- Molecular ion peak  $m/z = 122$
- After benzylic cleavage:  $m/z = 91$
- McLafferty rearrangement product:  $m/z = 92$

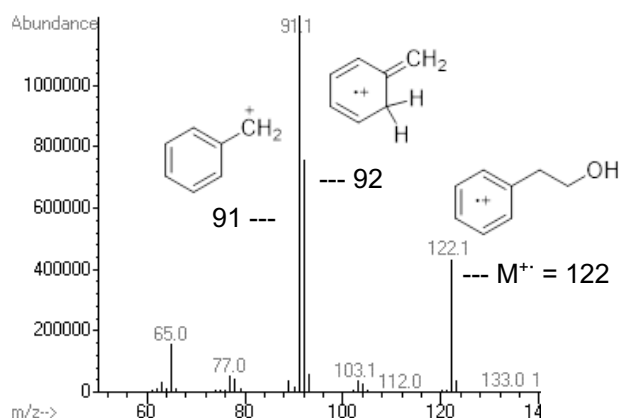

#### Mass fragmentations observed for 2-phenylethanol:

Benzylic cleavage:<sup>73</sup>

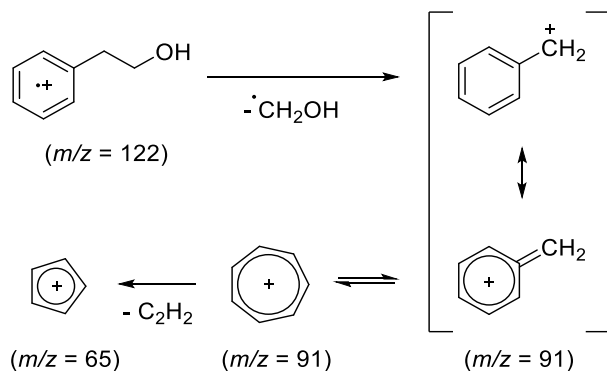

McLafferty rearrangement:

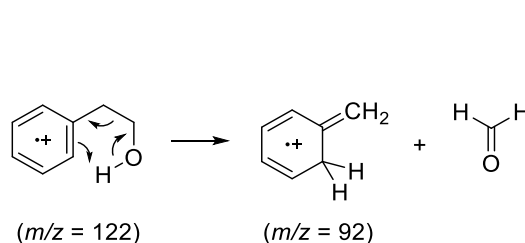

**Figure S31:** Deuteride migration regioselectivity evidence from MS fragmentation of deuterium labeled anti-Markovnikov products from bioconversions.

### Bioconversion of *trans*-styrene- $\beta$ -*d*:

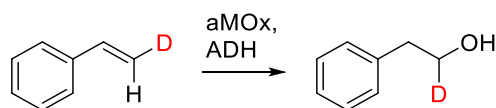

- Molecular ion peak  $m/z = 123$  confirms the *d*-label of the product.
- After benzylic cleavage:  $m/z = 91$
- McLafferty rearrangement product:  $m/z = 92$

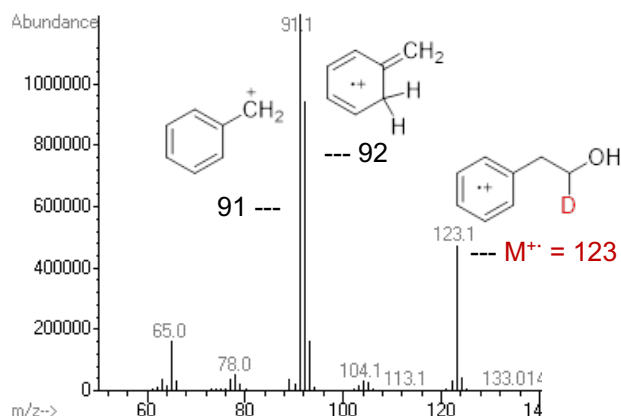

→ *d*-label remains untouched if in *trans*-position

### Bioconversion of *cis*-styrene- $\beta$ -*d*:

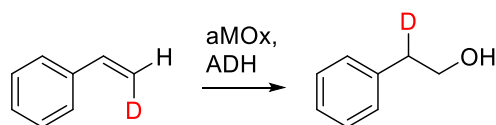

- Molecular ion peak  $m/z = 123$  confirms the *d*-label of the product.
- After benzylic cleavage:  $m/z = 92$
- McLafferty rearrangement product:  $m/z = 93$

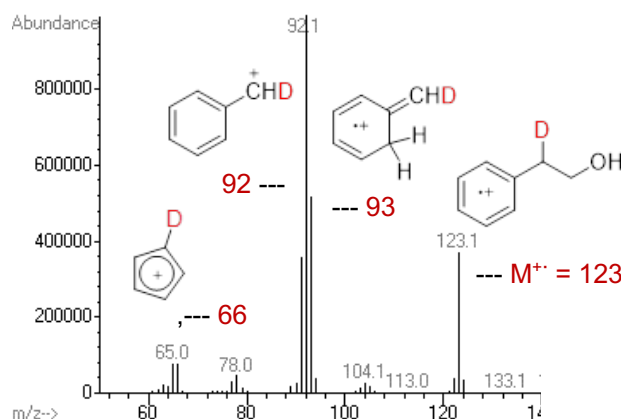

→ *d*-label migrates if in *cis*-position

**aMOx differentiates between enantiotopic hydrogen atoms → *cis*-selective hydride migration**

Both isotopically labeled isomers of styrene are converted to *d*-labeled 2-phenylethanol (molecular ion peak  $m/z = 123$ ) but the mass spectra differ clearly with regard to the fragmentation pattern. In the case of *trans*-styrene- $\beta$ -*d* as substrate, the fragmentation pattern is similar to that of unlabeled 2-phenylethanol. The ion count of  $m/z = 91$  results from a benzylic cleavage product whereas  $m/z = 92$  derives from a McLafferty rearrangement product. However, if *cis*-styrene- $\beta$ -*d* is used as substrate, the ion count of these most prominent fragmentation products increases by one, which indicates that a deuterium atom must have migrated to the benzylic position during the aMOx-catalyzed bioconversion. A residual ion

count of  $m/z = 91$  might suggest, that small quantities of the *trans*-hydride migrated or it originates from remaining quantities of non-labeled substrate.

This experiment confirms, that a high level of catalyst-control provided by aMOx enables the regioselective hydride migration exclusively for the hydride/deuteride in *cis*-position of the styrene substrate and thereby discriminates between enantiotopic hydrogen atoms. Yet, this finding does not provide any information about the expected enantioselectivity of this transformation.

## v. MS spectra from isotopic labeling experiment

**Table S9:** MS spectra of GC separated 2-phenylethanol or 2-phenylethan-2-*d*-1-ol after biotransformation of styrene, *cis*-styrene- $\beta$ -*d* and *trans*-styrene- $\beta$ -*d* using P450<sub>LA1</sub>, P450<sub>LA1</sub>-P7 and aMOx. P450<sub>LA1</sub> was *cis*-selective from the beginning and maintained the selectivity throughout the evolution. This can be derived from identical fragmentation patterns for the product 2-phenylethan-2-*d*-1-ol for P450<sub>LA1</sub>, P450<sub>LA1</sub>-P7 and aMOx. **Blue circle:** proton,  $m/z = \pm 0$ ; **red circle:** deuterium,  $m/z = +1$ .

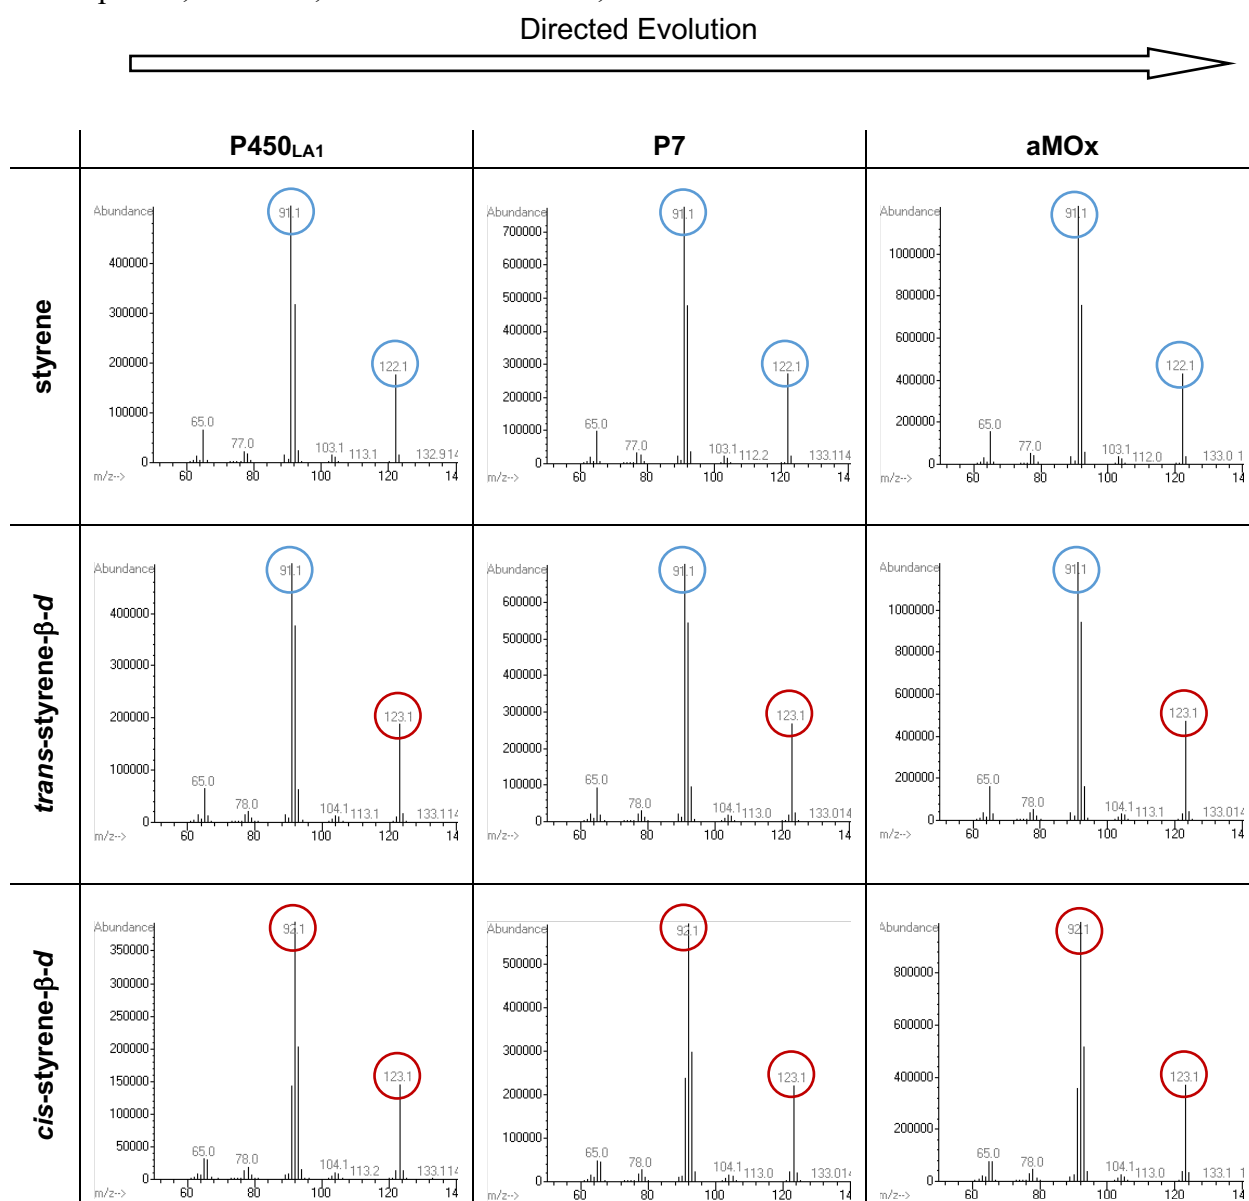

**Table S10:** MS spectra of GC separated 2-phenyloxirane or 2-phenyloxirane-3-*d* after biotransformation of styrene, *cis*-styrene- $\beta$ -*d* and *trans*-styrene- $\beta$ -*d* using P450<sub>LA1</sub>, P450<sub>LA1</sub>-P7 and aMOx. For the isotopically labeled epoxidation product, the fragmentation pattern is identical for both scenarios as expected. **Blue circle:** proton,  $m/z = \pm 0$ ; **red circle:** deuterium,  $m/z = +1$ .

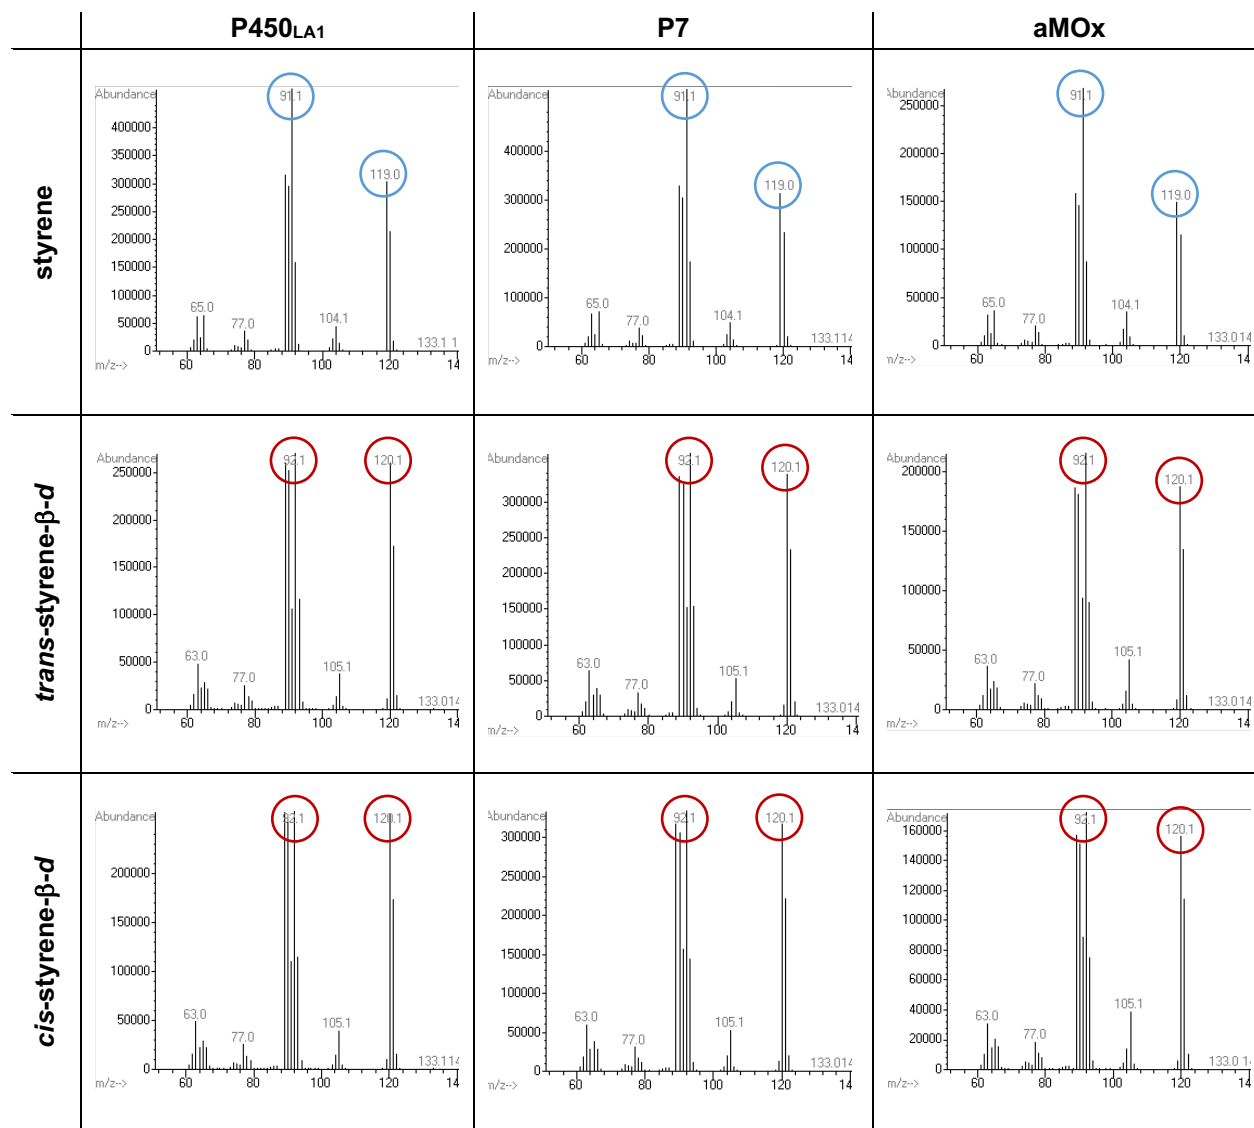

**Figure S32:** GC-MS chromatogram after biotransformation of *cis*-styrene- $\beta$ -*d* with P450<sub>LA1</sub> (black), P450<sub>LA1</sub>-P7 (red) and aMOx (blue) combined with PAR-ADH.

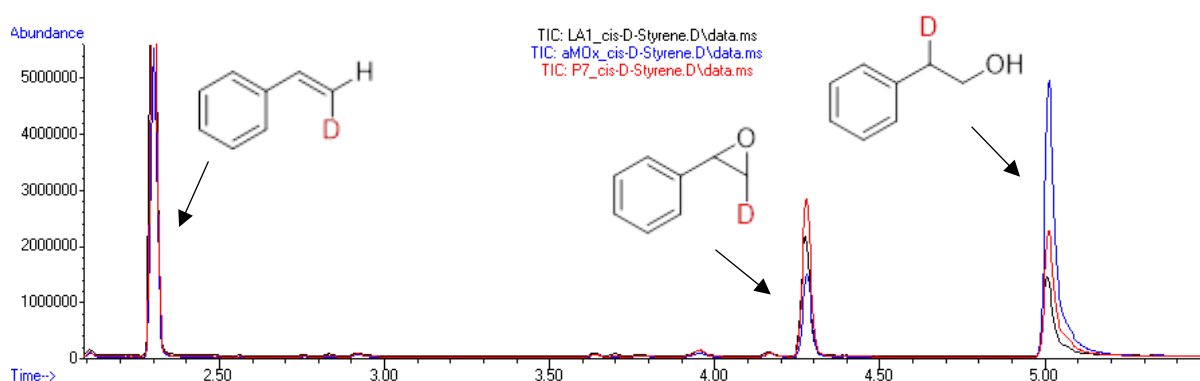

## VI. Chemical and enzymatic synthesis of isotopically labeled 2-phenylethan-2-*d*-1-ol

### Reactions:

A) - Preparative scale biotransformation

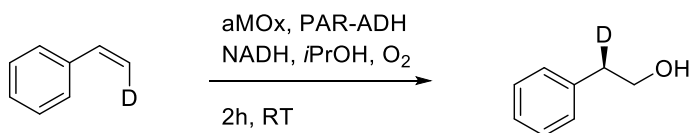

B) - Synthesis of racemic 2-phenylethan-2-*d*-1-ol

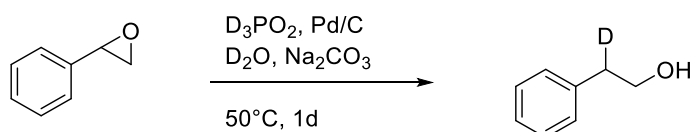

**Scheme 2:** A) Bioconversion of *cis*-styrene- $\beta$ -*d* with aMOx and PAR-ADH on preparative scale, B) chemical synthesis of racemic 2-phenylethan-2-*d*-1-ol .

### Setup A – Preparative scale bioconversion of *cis*-styrene- $\beta$ -*d* with aMOx and PAR-ADH

Cell free aMOx lysate (37 mL, 2.5  $\mu$ M final conc., 0.0625 mol% catalyst) and cell free PAR-ADH lysate (25 mL) were mixed in a 500 mL Schott flask together with NADH (2 mM final conc., 20 mL of a 200 mM stock solution) and *cis*-Styrene- $\beta$ -*d* (0.4 mmol, 2 mM final conc., 2 mL of a 200 mM stock solution in isopropanol) in a reaction buffer system (116 mL, 100 mM sodium phosphate, 150 mM NaCl, 2% glycerol, pH 8.0). The reaction mixture was incubated for 2 h at room temperature (180 rpm). After extraction with MTBE (3  $\times$  100 mL), the phases were separated by centrifugation. The combined organic extracts were washed with water (100 mL) and brine (100 mL) and dried over MgSO<sub>4</sub>, filtered, concentrated and purified by column chromatography (10 - 20% ethyl acetate/cyclohexane). By removing the epoxidation product, 20.0 mg (40.7%) of predominantly (*R*)-2-phenylethan-2-*d*-1-ol were isolated.

**(*R*)-2-phenylethan-2-*d*-1-ol from biotransformation:** <sup>1</sup>H NMR (500 MHz, CDCl<sub>3</sub>)  $\delta$  = 7.32–7.29 (m, 2H), 7.24–7.21 (m, 3H), 3.85 (br d, J = 6.4 Hz, 2H), 2.86 (m, 1H) ppm. <sup>13</sup>C NMR (125 MHz, CDCl<sub>3</sub>)  $\delta$  = 138.4, 129.0, 128.6, 126.5, 63.6, 38.8 (t, J = 19.5 Hz) ppm.



## $^1\text{H}$ NMR (500 MHz, $\text{CDCl}_3$ )

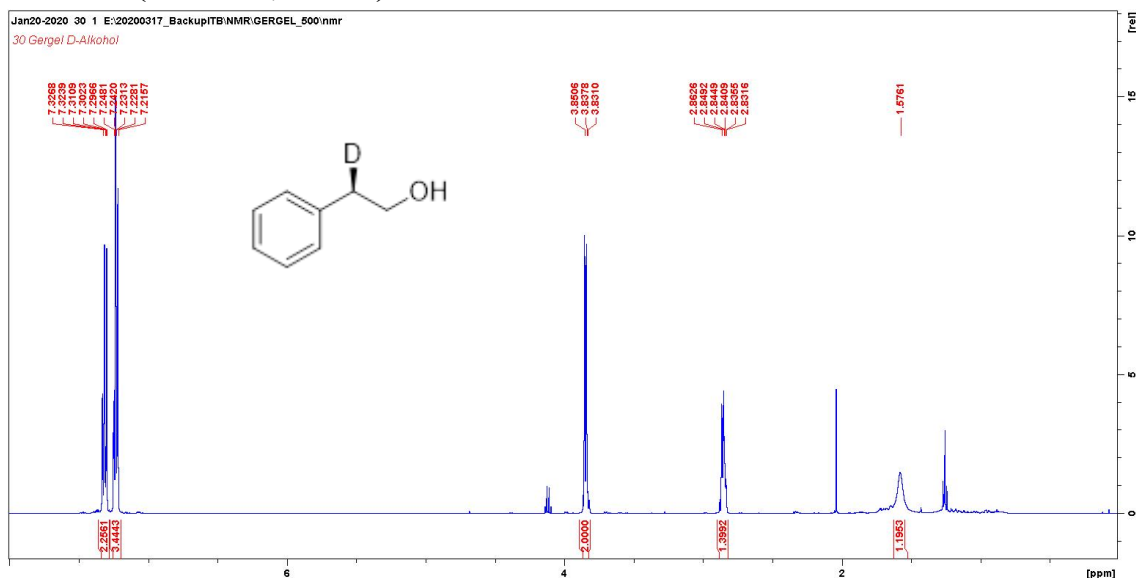

## $^{13}\text{C}$ NMR (125 MHz, $\text{CDCl}_3$ )

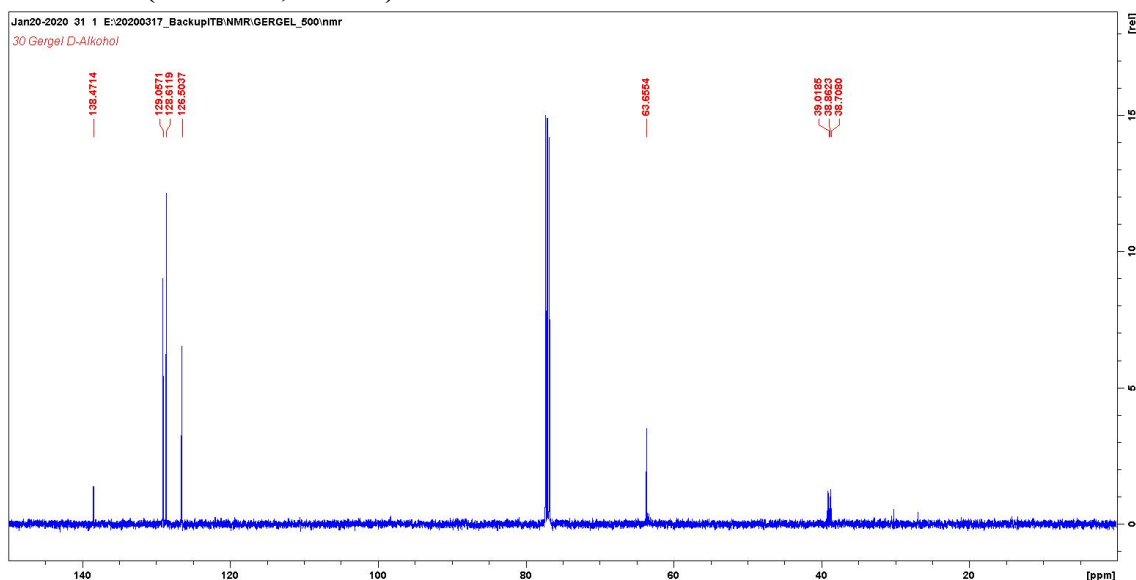

### Setup B – Chemical synthesis of racemic 2-phenylethanol-2-d1-ol

Racemic 2-phenylethanol-2-d1-ol was synthesized according to literature.<sup>74</sup> A solution of  $\text{D}_3\text{PO}_2$  (6.00 mmol, 3 eq.) in  $\text{D}_2\text{O}$  (12 mL) was added to a mixture of styrene oxide (0.24 g, 2.00 mmol, 1 eq.), sodium carbonate (0.64 g, 6.00 mmol, 3 eq.) and 10% Pd/C (35.4 mg). The mixture was stirred over night at 50°C. After cooling, the mixture was acidified with aqueous HCl (1 M), taken up in dichloromethane (100 mL) and filtered through celite. The organic phase was separated, dried over  $\text{MgSO}_4$ , filtered and concentrated to yield 2-phenylethanol-2-d1-ol (49%, 120 mg, 0.97 mmol).

**(rac)-2-phenylethan-2-*d*-1-ol:**  $^1\text{H}$  NMR (500 MHz,  $\text{CDCl}_3$ )  $\delta$  = 7.33–7.30 (m, 2H), 7.25–7.22 (m, 3H), 3.86 (br d,  $J$  = 6.4 Hz, 2H), 2.86 (m, 1H) ppm.  $^{13}\text{C}$  NMR (125 MHz,  $\text{CDCl}_3$ )  $\delta$  = 138.4, 129.0, 128.6, 126.5, 63.6, 38.8 (t,  $J$  = 19.5 Hz) ppm.

### $^1\text{H}$ NMR (500 MHz, $\text{CDCl}_3$ )

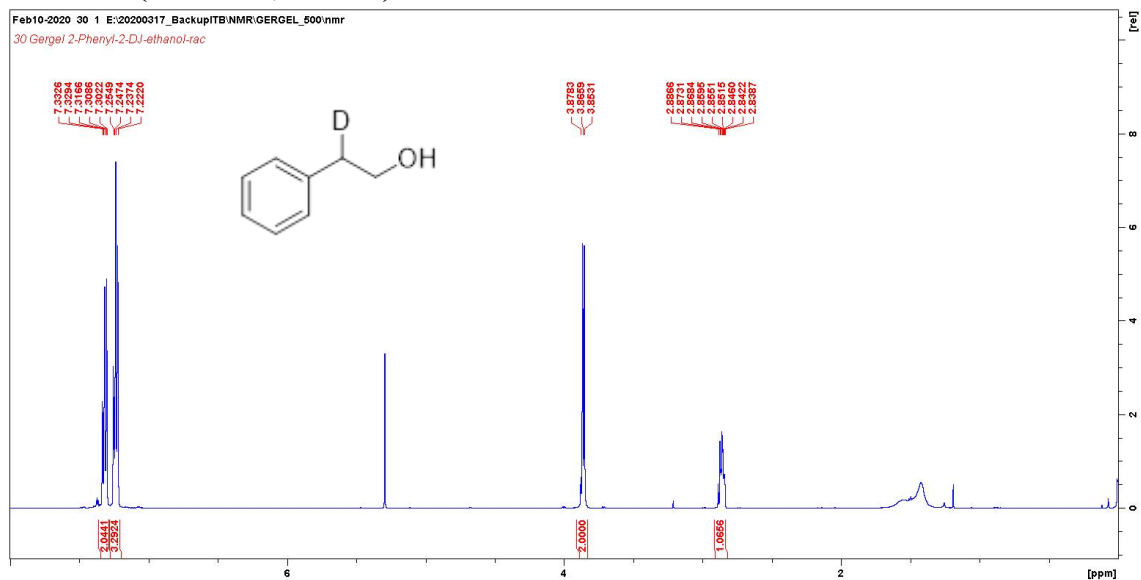

### $^{13}\text{C}$ NMR (125 MHz, $\text{CDCl}_3$ )

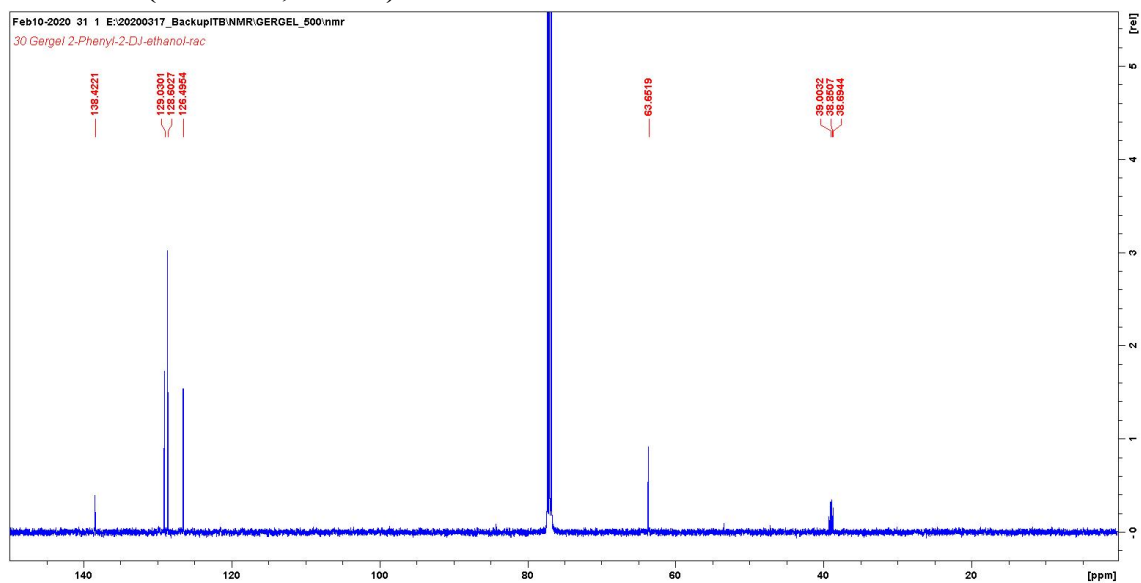

## VII. NMR-analysis to determine the enantioselectivity

**Question:** Is the hydride migration controlled by aMOx also enantioselective?

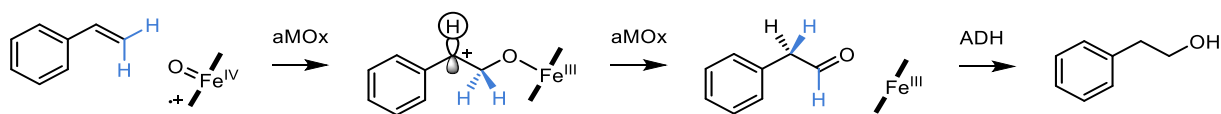

**Approach:** *cis*-styrene- $\beta$ - $d$  was converted by aMOx and PAR-ADH on preparative scale and the anti-Markovnikov product was isolated and purified after biotransformation (**Section B vi**). The obtained enantioenriched 2-phenylethanol-2- $d$ -1-ol was esterified with (*S*)-(+)-MTPA-Cl in order to undergo a Mosher ester analysis for the determination of the absolute configuration of the formed  $d$ -labeled stereogenic center. For comparison, also the Mosher esters of (*rac*)-2-phenylethanol-2- $d$ -1-ol and 2-phenylethanol were synthesized. Although the chemical shifts of generated diastereomeric compounds using the Mosher ester method should differ significantly, this is not the case for compounds with deuterium stereocenters. As shown in **Figure S33-A** (red), the signals of the benzylic protons of the racemic mixture overlap fully and prevent a separated consideration of the diastereomers. For this reason, the spectra have been simplified by decoupling by irradiation of the methylene protons.<sup>75,76</sup> Two baseline separated broad peaks for both diastereomers are the result (**Figure S33-B**, red).

### Mosher ester derivatization<sup>75-77</sup>

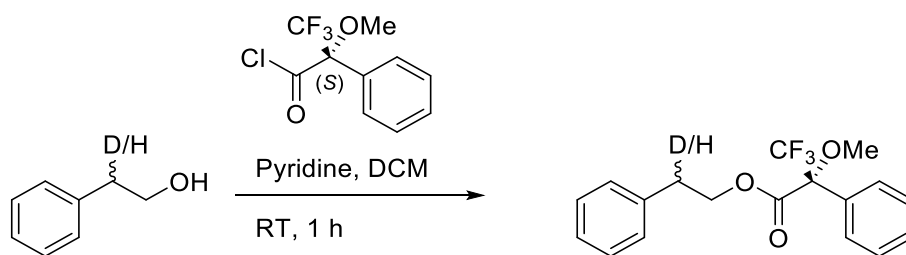

**Scheme S3:** Mosher ester derivatization of (*R*)-2-phenylethanol-2- $d$ -1-ol, (*rac*)-2-phenylethanol-2- $d$ -1-ol and 2-phenylethanol.

**(R)-2-phenylethyl-2-d (R)-3,3,3-trifluoro-2-methoxy-2-phenylpropanoate:**

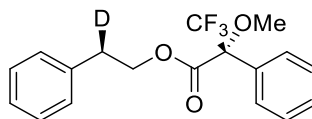

(S)-(+)-MTPA-Cl (27.9  $\mu$ L, 0.15 mmol, 1.9 eq.) was added to a mixture of (R)-2-phenylethyl-2-d-1-ol (9.66 mg, 0.08 mmol, 1 eq.) and pyridine (19.6  $\mu$ L, 24.3 mmol, 3.1 eq.) in DCM (1 mL) and stirred for 1 h at room temperature. The reaction mixture was directly purified by prep-TLC on silica gel (9:1 cyclohexane/ethyl acetate). Scratching off the spot with the highest retention factor ( $R_f$ ), extraction with DMC, filtering and concentrating *in vacuo* yielded the (R)-d-mosher ester (94%, 25.2 mg, 0.07 mmol) as yellow oil.

$^1\text{H}$  NMR (500 MHz,  $\text{CDCl}_3$ )  $\delta$  = 7.45–7.43 (m, 2H), 7.42–7.35 (m, 3H), 7.31–7.28 (m, 2H), 7.26–7.24 (m, 1H), 7.21–7.19 (m, 2H), 4.55 (d,  $J$  = 6.8 Hz, 2H), 3.47 (s, 3H), 3.02 (t,  $J$  = 6.5 Hz, 1H) ppm.

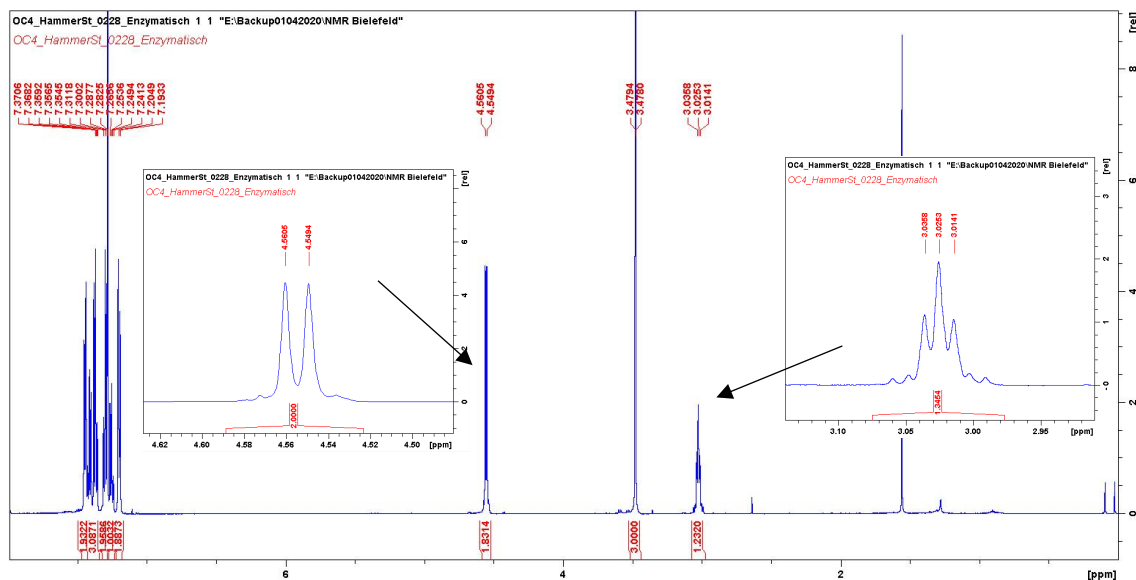

$^1\text{H}$  NMR (500 MHz,  $\text{CDCl}_3$ ) with decoupling by irradiation of the methylene protons ( $\delta$  = 4.52) using the Bruker zgpd.2 standard pulse program.

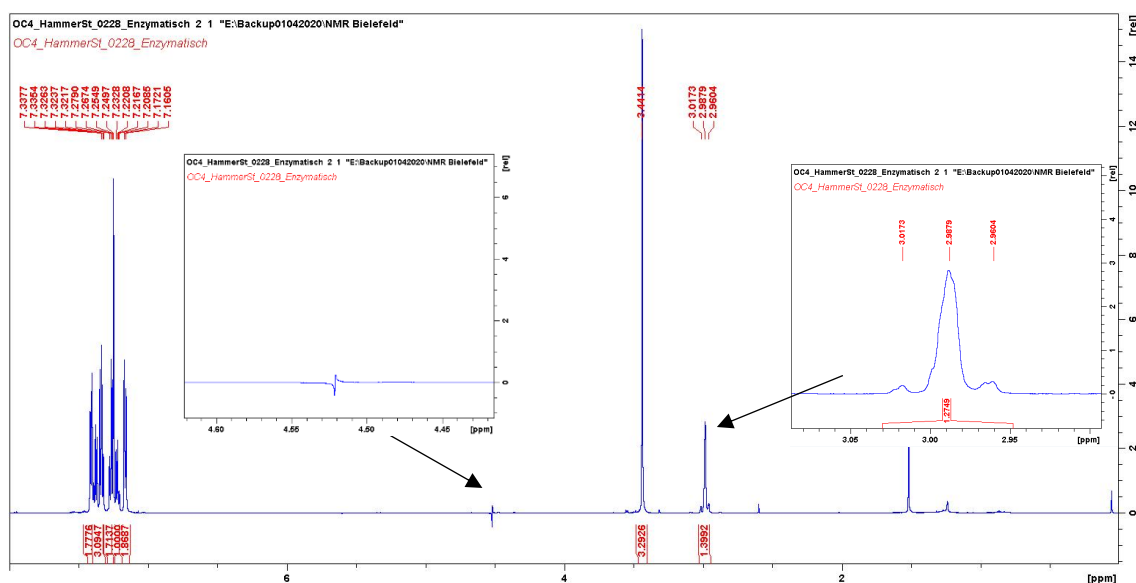

**(rac)-2-phenylethyl-2-*d* (2*R*)-3,3,3-trifluoro-2-methoxy-2-phenylpropanoate:**

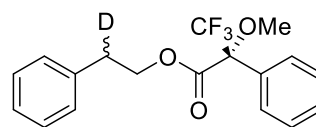

(*S*)-(+)-MTPA-Cl (28.8  $\mu$ L, 0.15 mmol, 1.9 eq.) was added to a mixture of (*rac*)-2-phenylethyl-2-*d*-1-ol (10.0 mg, 0.08 mmol, 1 eq.) and pyridine (20.3  $\mu$ L, 25.1 mmol, 3.1 eq.) in DCM (1 mL) and stirred for 1 h at room temperature. The reaction mixture was directly purified by prep-TLC on silica gel (9:1 cyclohexane/ethyl acetate). Scratching off the spot with the highest retention factor ( $R_f$ ), extraction with DMC, filtering and concentrating *in vacuo* yielded the (*rac*)-*d*-Mosher ester (89%, 24.4 mg, 0.07 mmol) as yellow oil.

$^1\text{H}$  NMR (500 MHz,  $\text{CDCl}_3$ )  $\delta$  = 7.45–7.43 (m, 2H), 7.42–7.35 (m, 3H), 7.31–7.28 (m, 2H), 7.26–7.24 (m, 1H), 7.21–7.19 (m, 2H), 4.55 (d,  $J$  = 6.8 Hz, 2H), 3.47 (s, 3H), 3.05–2.98 (m, 1H) ppm.

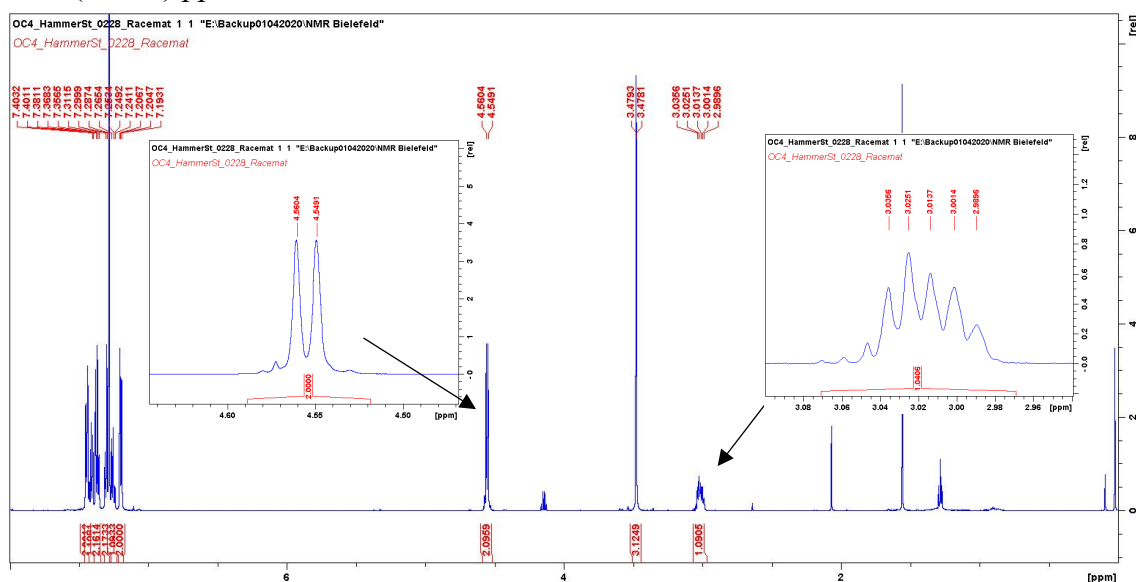

$^1\text{H}$  NMR (500 MHz,  $\text{CDCl}_3$ ) with decoupling by irradiation of the methylene protons ( $\delta$  = 4.52) using the Bruker zgpd.2 standard pulse program.

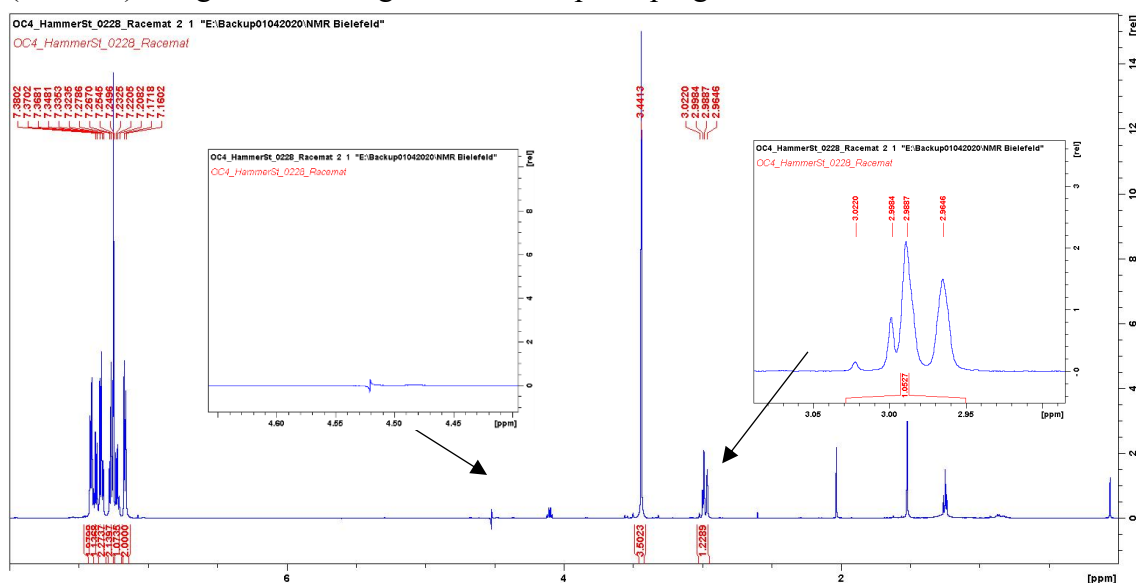

**Phenethyl (R)-3,3,3-trifluoro-2-methoxy-2-phenylpropanoate:**

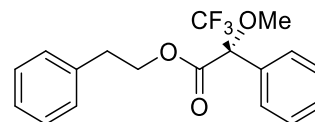

(S)-(+)-MTPA-Cl (14.4  $\mu$ L, 0.08 mmol, 1.9 eq.) was added to a mixture of 2-phenylethanol (5.00 mg, 0.04 mmol, 1 eq.) and pyridine (10.1  $\mu$ L, 12.6 mmol, 3.1 eq.) in DCM (1 mL) and stirred for 1 h at room temperature. The reaction mixture was directly purified by prep-TLC on silica gel (9:1 cyclohexane/ethyl acetate). Scratching off the spot with the highest retention factor ( $R_f$ ), extraction with DMC, filtering and concentrating *in vacuo* yielded the Mosher ester (>99%, 14.21 mg, 0.04 mmol) as yellow oil.

$^1\text{H NMR}$  (500 MHz,  $\text{CDCl}_3$ )  $\delta$  = 7.45–7.43 (m, 2H), 7.42–7.35 (m, 3H), 7.31–7.28 (m, 2H), 7.26–7.24 (m, 1H), 7.21–7.19 (m, 2H), 4.56 (t,  $J$  = 6.9 Hz, 2H), 3.47 (s, 3H), 3.07–2.99 (m, 2H) ppm.

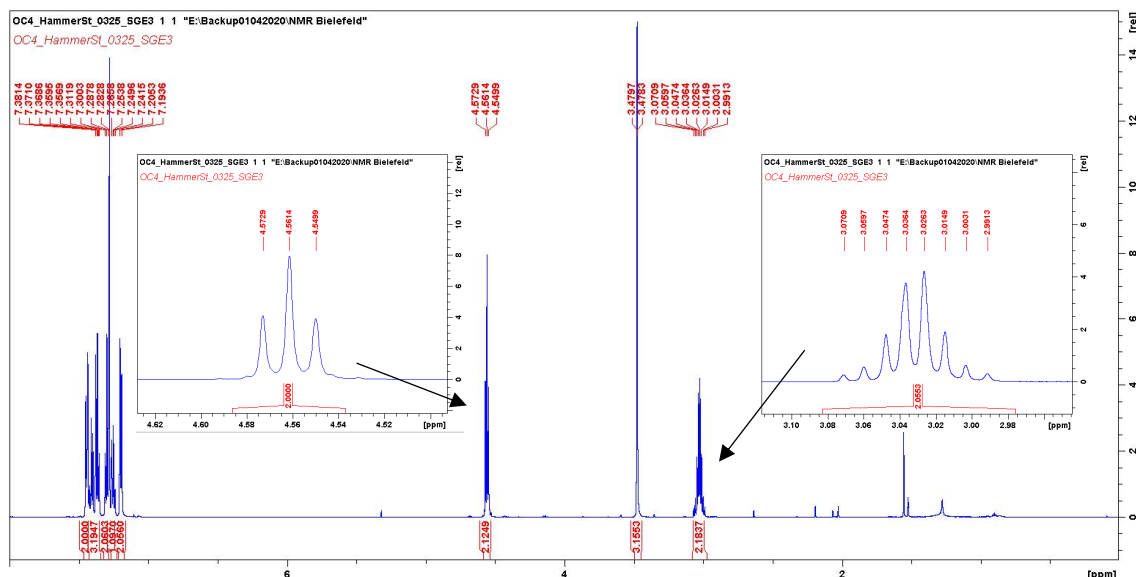

$^1\text{H NMR}$  (500 MHz,  $\text{CDCl}_3$ ) with decoupling by irradiation of the methylene protons ( $\delta$  = 4.52) using the Bruker zgpd.2 standard pulse program.

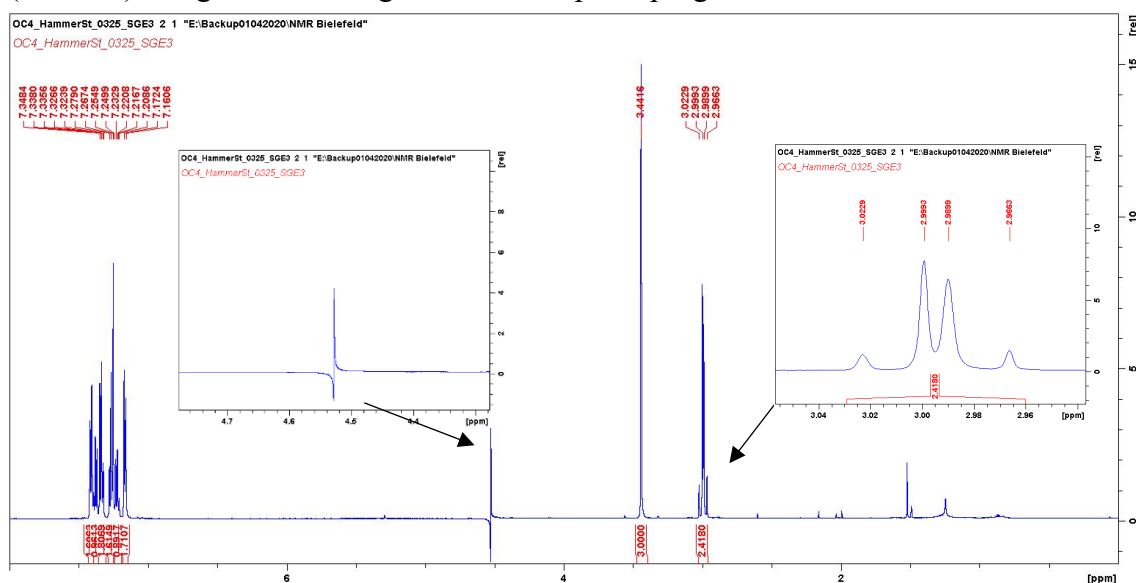

**Figure S33:** Hydride migration enantioselectivity evidence from NMR analysis.

**A – Benzylic protons**

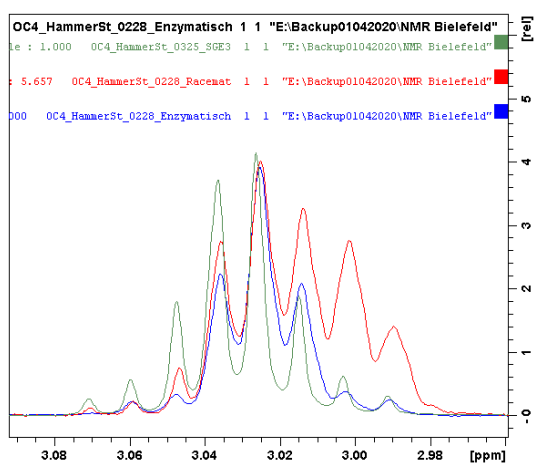

**B – Benzylic protons after decoupling**

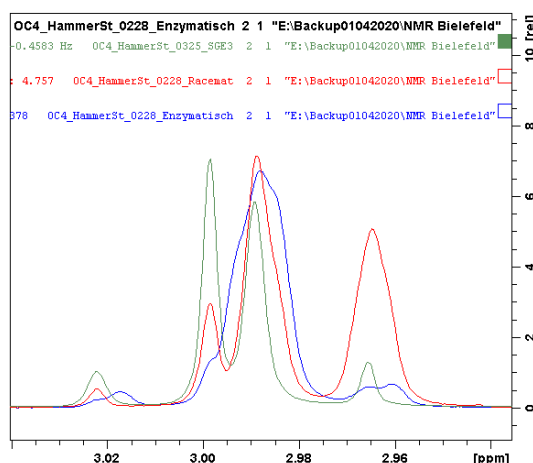

(A) Overlap of proton NMR spectra showing the signal of  $\beta$ -deuterated (*R*)-enantioenriched (blue) and racemic (red) 2-phenylethanol as well as the benzylic protons of non-deuterated 2-phenylethanol (green). (B) Overlapped spectra after decoupling by irradiation of the methylene protons ( $\delta = 4.52$ ).

**C – Biotransformation**

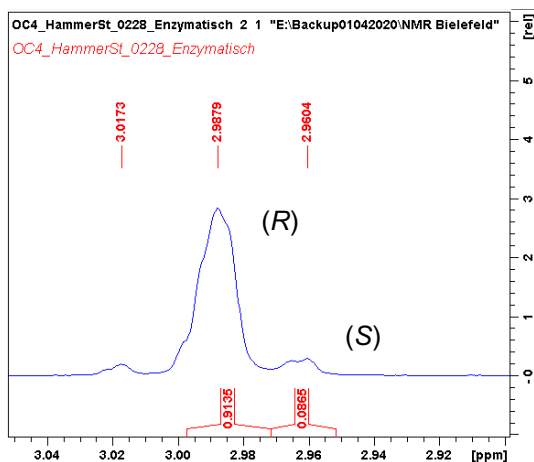

91(*R*):9(*S*)

**D – Racemate**

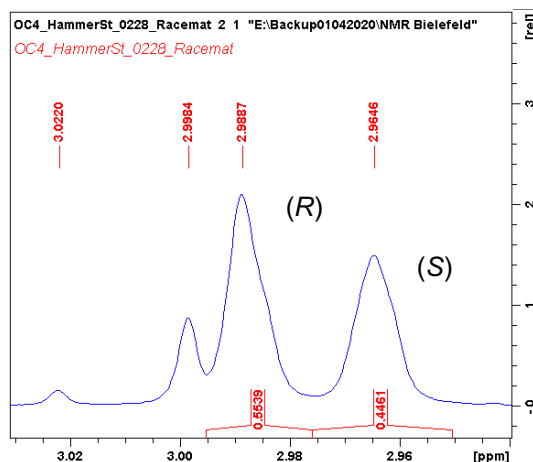

55(*R*):45(*S*)

Both the sample from the biotransformation (C) and the synthesized racemate (D) contain considerable amounts of the undeuterated compound (compare to green in Fig. A + B). It is believed that this species loses its deuterium label through keto-enol tautomerism of the aldehyde before being reduced to the corresponding alcohol. This impurity was neglected as far as possible in the integration of both signals. Comparison with literature data<sup>75,76</sup> reveals that the aMOx-catalyzed deuteride migration yields predominately the *R*-enantiomer with an enantiomeric ratio of  $de = >90(R):10(S)$ . This confirms that aMOx provides a high level of enantiocontrol over the hydride/deuteride migration.

**Figure S34:** Hydride migration enantioselectivity for styrene and  $\alpha$ -methylstyrene.

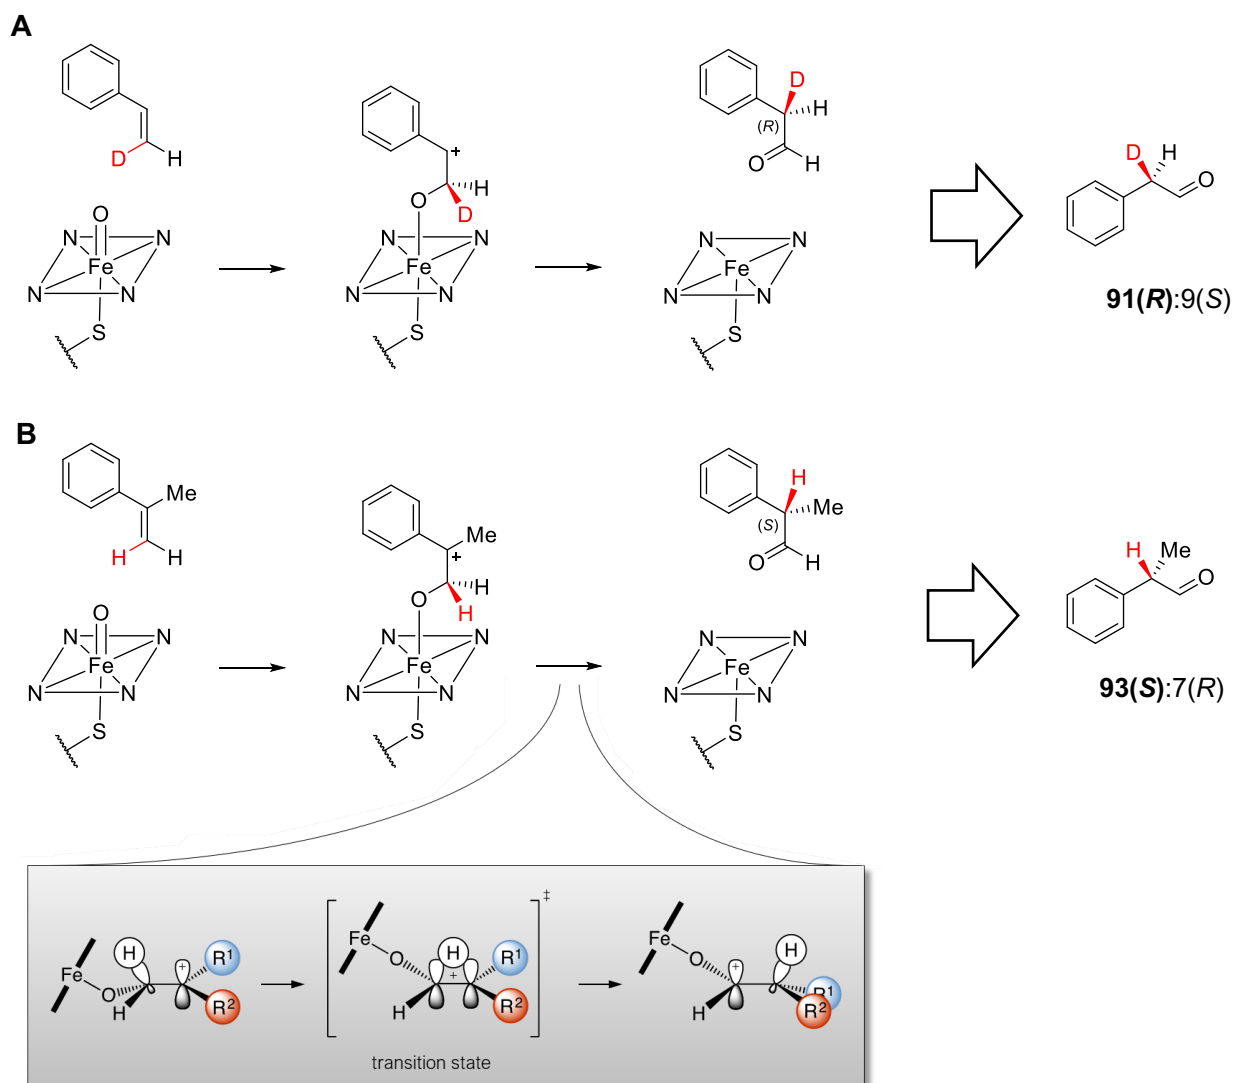

Enantioselectivity was determined in different ways for styrene (**A**) (**Figure S33** and **Figure S35**), and  $\alpha$ -methylstyrene (**B**), see previous paper<sup>69</sup>), but in both cases the same selectivity was determined. The hydride/deuteride migration occurs selectively on the *re*-side after proper positioning of the substrate in the active site (see **Figure S21**). This also confirms the postulated orbital alignment (grey box), where only the *cis*-substituent is able to migrate because of the favored orbital overlap of the empty  $p_z$ -orbital.



## VIII. Enantioselectivity in epoxidation as a function of evolution

Figure S35: Enantioselectivity in the epoxidation as a function of evolution.

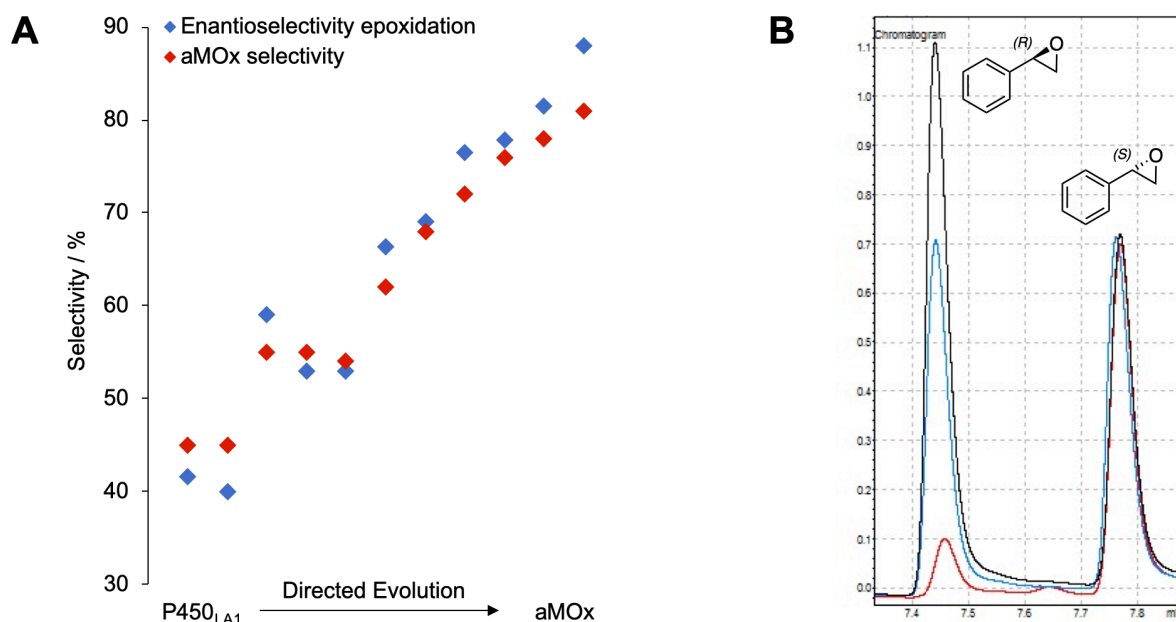

(A) Enantioselectivity in the epoxidation as a function of directed evolution. Interestingly, the enantioselectivity in epoxidation changes during evolution stepwise in analogy to the aMOx selectivity. While wildtype P450<sub>LA1</sub> generates preferably the (*R*)-enantiomer (60:40 of *R*:*S*), epoxidation gets more and more (*S*)-selective during directed evolution and reaches a ratio of 14:86 (*R*:*S*) for aMOx. (B) Chiral-GC chromatograms of selected variants: P450<sub>LA1</sub> (black), P7 (blue) and aMOx (red).

## IX. UV/Vis spectroscopic analysis of substrate binding

**Figure S36:** UV/Vis spectroscopic analysis of substrate binding.

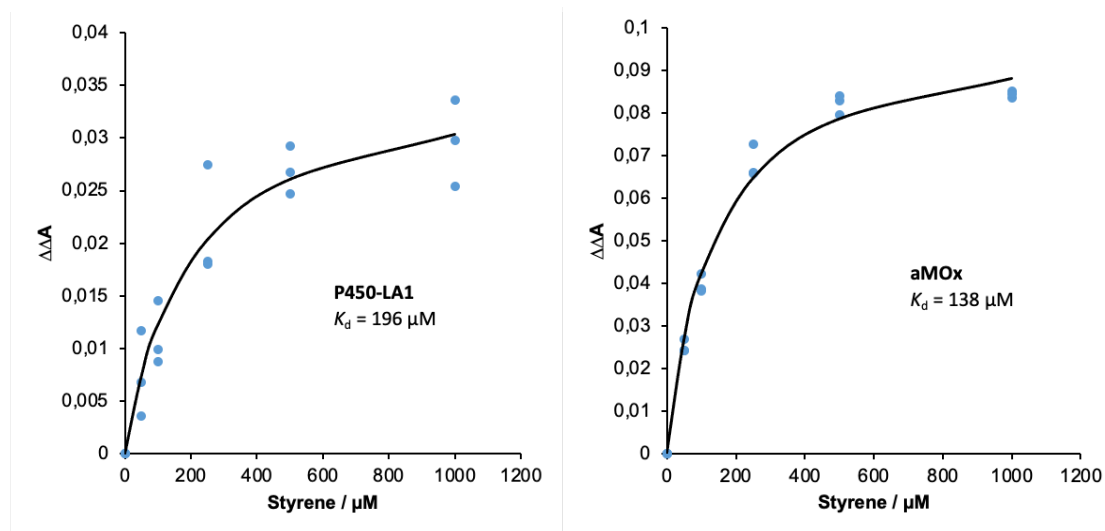

The dissociation constant of styrene was determined by UV/Vis difference spectroscopy at different substrate concentrations. The obtained difference spectra support type I binding in which heme bound water is displaced by productive substrate binding. The determined dissociation constant decreases from  $196 \mu\text{M}$  for P450<sub>LA1</sub> to  $136 \mu\text{M}$  for aMOx during the directed evolution, which supports the optimization of the active site for styrene binding (see general procedures in the experimental section of the SI details). Please consider that this data should be treated with caution, as styrene has a solubility limit of approximately 2 mM under these conditions.

## x. Michealis-Menten kinetics

Figure S37: Michealis-Menten kinetics.

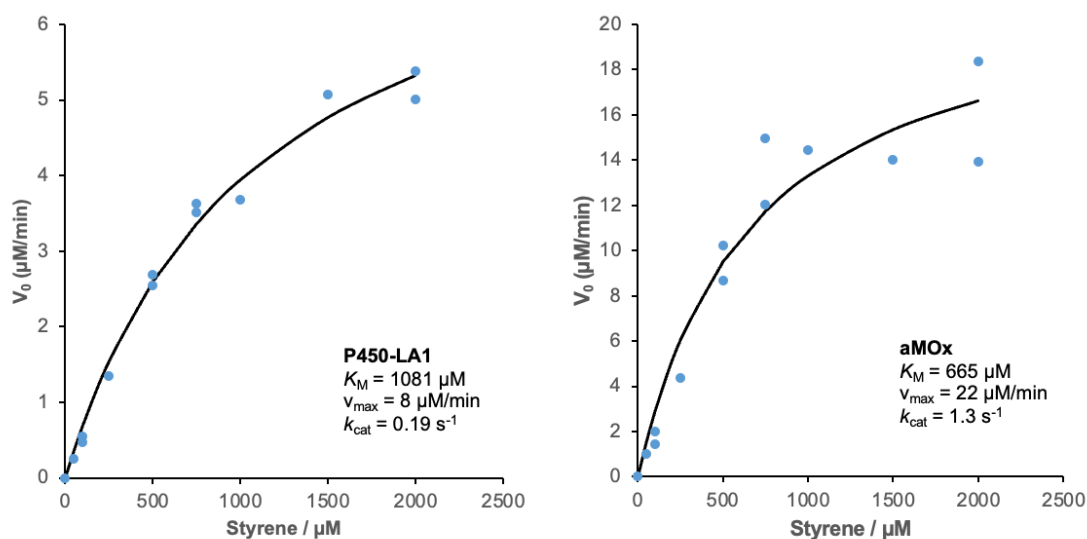

The kinetic parameters for the P450<sub>LA1</sub> and aMOX catalyzed reaction with styrene were calculated by determining the initial velocities at different substrate concentrations (see general procedures in the experimental section of the SI details). During the directed evolution  $K_M$  decreased 1.6-fold while  $k_{\text{cat}}$  increased 6.8-fold. The resulting catalytic efficiency of aMOX ( $2.0 \times 10^3 \text{ M}^{-1} \text{ s}^{-1}$ ) is one order of magnitude higher than the efficiency of P450<sub>LA1</sub>. The decrease of  $K_M$  during evolution is in accordance with improved substrate binding to aMOX. Please consider that this data should be treated with caution, as styrene has a solubility limit of approximately 2 mM under these conditions.

## XI. Coupling efficiencies

**Figure S38:** Coupling efficiencies.

| Enzyme              | Coupling efficiency / % | Uncoupling to H <sub>2</sub> O <sub>2</sub> / % |
|---------------------|-------------------------|-------------------------------------------------|
| P450 <sub>LA1</sub> | 6.5                     | 3.9                                             |
| aMOx                | 26                      | 4.6                                             |

The coupling efficiencies of P450<sub>LA1</sub> and aMOx were determined using styrene as the substrate by relating NADH consumption to product formation. During directed evolution the coupling efficiency increases significantly, which might result from improved substrate binding and contribute to the increased  $k_{cat}$ . However, uncoupling via the peroxide shunt (H<sub>2</sub>O<sub>2</sub> formation) is not observed, suggesting that the active site is not water accessible but that there might be uncoupling via the oxidase shunt.

### C. Optimized structures (cartesian coordinates) of characterized stationary points

**Table S11:** Cartesian coordinates (xyz, in Å) of all DFT optimized stationary points reported in **Figures S1 to S2 and S4** and **Tables S1 and S3**.

| [ 1 + Cpd I ] <sup>d</sup> (reactant complex) |           |           |           | [ 1 + Cpd I ] <sup>a</sup> (reactant complex) |           |           |           |
|-----------------------------------------------|-----------|-----------|-----------|-----------------------------------------------|-----------|-----------|-----------|
| Fe                                            | 0.925842  | 0.031903  | 0.092113  | Fe                                            | 0.930808  | 0.030444  | 0.086757  |
| N                                             | 2.200204  | 1.434344  | -0.612806 | N                                             | 2.201381  | 1.436738  | -0.614668 |
| N                                             | 1.787169  | -1.325214 | -1.140866 | N                                             | 1.795317  | -1.321802 | -1.139979 |
| N                                             | 0.340850  | 1.299830  | 1.543398  | N                                             | 0.340788  | 1.298696  | 1.541680  |
| N                                             | -0.089762 | -1.455600 | 0.997032  | N                                             | -0.087283 | -1.458064 | 0.990200  |
| C                                             | 2.305031  | 2.738653  | -0.188337 | C                                             | 2.302868  | 2.741260  | -0.188420 |
| C                                             | 1.466910  | -2.661108 | -1.251631 | C                                             | 1.481845  | -2.660472 | -1.247895 |
| C                                             | 3.021851  | 1.329378  | -1.707520 | C                                             | 3.027397  | 1.333998  | -1.705953 |
| C                                             | 2.671545  | -1.065028 | -2.169977 | C                                             | 2.687605  | -1.062100 | -2.163321 |
| C                                             | 0.698712  | 2.616762  | 1.682202  | C                                             | 0.693660  | 2.616521  | 1.679415  |
| C                                             | -0.171768 | -2.764106 | 0.593083  | C                                             | -0.167715 | -2.766072 | 0.586119  |
| C                                             | -0.588404 | 1.058601  | 2.523849  | C                                             | -0.591122 | 1.055646  | 2.518638  |
| C                                             | -0.972050 | -1.330102 | 2.045880  | C                                             | -0.971550 | -1.333165 | 2.037792  |
| C                                             | 3.223675  | 3.466172  | -1.029127 | C                                             | 3.222588  | 3.470749  | -1.026341 |
| C                                             | 2.187965  | -3.257993 | -2.349027 | C                                             | 2.213543  | -3.257558 | -2.337696 |
| C                                             | 3.663459  | 2.592839  | -1.976598 | C                                             | 3.667127  | 2.598773  | -1.972822 |
| C                                             | 2.928294  | -2.268934 | -2.920061 | C                                             | 2.954198  | -2.267588 | -2.906746 |
| C                                             | -0.018438 | 3.219866  | 2.778481  | C                                             | -0.029319 | 3.219224  | 2.772267  |
| C                                             | -1.117622 | -3.484511 | 1.409538  | C                                             | -1.115793 | -3.487269 | 1.399316  |
| C                                             | -0.821802 | 2.251349  | 3.299848  | C                                             | -0.831230 | 2.248760  | 3.292333  |
| C                                             | -1.615348 | -2.592995 | 2.311750  | C                                             | -1.615467 | -2.596417 | 2.301103  |
| H                                             | 3.483677  | 4.508482  | -0.896901 | H                                             | 3.480390  | 4.513418  | -0.892641 |
| H                                             | 2.116834  | -4.299424 | -2.635174 | H                                             | 2.148366  | -4.300138 | -2.621036 |
| H                                             | 4.362404  | 2.766385  | -2.784548 | H                                             | 4.368537  | 2.773915  | -2.778279 |
| H                                             | 3.594152  | -2.329687 | -3.771173 | H                                             | 3.626296  | -2.328682 | -3.752910 |
| H                                             | 0.091970  | 4.249566  | 3.093081  | H                                             | 0.076244  | 4.249892  | 3.085346  |
| H                                             | -1.353011 | -4.534843 | 1.295834  | H                                             | -1.350676 | -4.537581 | 1.284431  |
| H                                             | -1.509244 | 2.317915  | 4.133125  | H                                             | -1.522197 | 2.314362  | 4.122778  |
| H                                             | -2.345189 | -2.757680 | 3.093819  | H                                             | -2.346906 | -2.761779 | 3.081549  |
| C                                             | 1.619418  | 3.289160  | 0.884994  | C                                             | 1.614871  | 3.290456  | 0.883730  |
| C                                             | 0.559795  | -3.333630 | -0.445662 | C                                             | 0.570643  | -3.334635 | -0.448515 |
| C                                             | -1.207541 | -0.163792 | 2.759689  | C                                             | -1.208386 | -0.168138 | 2.752955  |
| C                                             | 3.233569  | 0.169888  | -2.446247 | C                                             | 3.245849  | 0.173744  | -2.441631 |
| H                                             | 1.804184  | 4.334430  | 1.111636  | H                                             | 1.797264  | 4.336166  | 1.110250  |
| H                                             | 0.395424  | -4.386608 | -0.651228 | H                                             | 0.410522  | -4.388170 | -0.654488 |
| H                                             | -1.927780 | -0.210823 | 3.570267  | H                                             | -1.930192 | -0.216659 | 3.562050  |
| H                                             | 3.909266  | 0.233951  | -3.293077 | H                                             | 3.925602  | 0.237468  | -3.285205 |
| O                                             | -0.273820 | 0.412030  | -0.939553 | O                                             | -0.280527 | 0.422111  | -0.926806 |
| S                                             | 3.086033  | -0.660948 | 1.416508  | S                                             | 3.080868  | -0.653952 | 1.421238  |
| C                                             | 2.863795  | -2.314049 | 2.140818  | C                                             | 2.859468  | -2.306158 | 2.147841  |
| H                                             | 2.718821  | -3.048239 | 1.339124  | H                                             | 2.717523  | -3.042045 | 1.347158  |
| H                                             | 3.771120  | -2.583282 | 2.689729  | H                                             | 3.766006  | -2.572984 | 2.699228  |
| H                                             | 1.997387  | -2.346332 | 2.805774  | H                                             | 1.991634  | -2.338524 | 2.810890  |
| C                                             | -2.835347 | 2.715130  | -1.968226 | C                                             | -2.853405 | 2.720371  | -1.955814 |
| H                                             | -2.012674 | 2.089900  | -1.629435 | H                                             | -2.029067 | 2.098189  | -1.615564 |
| H                                             | -2.571710 | 3.693430  | -2.360866 | H                                             | -2.592960 | 3.700665  | -2.345548 |
| C                                             | -4.117877 | 2.327193  | -1.918868 | C                                             | -4.134304 | 2.326479  | -1.911514 |
| H                                             | -4.880112 | 3.018254  | -2.280656 | H                                             | -4.898417 | 3.014820  | -2.274511 |
| C                                             | -4.646320 | 1.044337  | -1.421544 | C                                             | -4.658648 | 1.040298  | -1.418488 |
| C                                             | -6.036221 | 0.829517  | -1.442977 | C                                             | -6.047421 | 0.818990  | -1.445865 |
| C                                             | -3.822715 | 0.015607  | -0.921592 | C                                             | -3.832250 | 0.014587  | -0.916961 |
| C                                             | -6.591440 | -0.365317 | -0.982074 | C                                             | -6.598848 | -0.379270 | -0.989337 |
| H                                             | -6.686989 | 1.612400  | -1.826568 | H                                             | -6.700311 | 1.599479  | -1.830708 |
| C                                             | -4.377517 | -1.176578 | -0.460696 | C                                             | -4.383255 | -1.181032 | -0.460440 |
| H                                             | -2.744140 | 0.146489  | -0.893718 | H                                             | -2.754453 | 0.150479  | -0.884416 |
| C                                             | -5.763181 | -1.374499 | -0.487650 | C                                             | -5.767839 | -1.385427 | -0.493376 |
| H                                             | -7.668856 | -0.506295 | -1.009855 | H                                             | -7.675463 | -0.525256 | -1.021683 |
| H                                             | -3.724948 | -1.956275 | -0.075764 | H                                             | -3.728568 | -1.958307 | -0.074225 |
| H                                             | -6.190228 | -2.306651 | -0.127282 | H                                             | -6.191938 | -2.320219 | -0.136382 |

**TS1<sup>d</sup>** (conformer 1)

|    |           |           |           |
|----|-----------|-----------|-----------|
| Fe | 0.840080  | -0.018140 | -0.127900 |
| N  | 1.902920  | -1.619920 | 0.485880  |
| N  | 2.110990  | 1.210400  | 0.864800  |
| N  | -0.307180 | -1.228350 | -1.251300 |
| N  | -0.065620 | 1.598590  | -0.927640 |
| C  | 1.676300  | -2.938600 | 0.175080  |
| C  | 2.054240  | 2.579640  | 0.934500  |
| C  | 2.967060  | -1.611260 | 1.355070  |
| C  | 3.130430  | 0.827250  | 1.701660  |
| C  | -0.240180 | -2.598440 | -1.336230 |
| C  | 0.168900  | 2.916540  | -0.618770 |
| C  | -1.328410 | -0.846260 | -2.088400 |
| C  | -1.130980 | 1.594740  | -1.792430 |
| C  | 2.623540  | -3.782220 | 0.861880  |
| C  | 3.070820  | 3.075240  | 1.833600  |
| C  | 3.422740  | -2.958730 | 1.595500  |
| C  | 3.737130  | 1.988490  | 2.309940  |
| C  | -1.256180 | -3.092770 | -2.234010 |
| C  | -0.762840 | 3.765460  | -1.321720 |
| C  | -1.931950 | -2.005650 | -2.699690 |
| C  | -1.568990 | 2.945520  | -2.050860 |
| H  | 2.656970  | -4.861130 | 0.780540  |
| H  | 3.236060  | 4.121640  | 2.056160  |
| H  | 4.250330  | -3.220130 | 2.242450  |
| H  | 4.565210  | 1.954370  | 3.006330  |
| H  | -1.410220 | -4.137760 | -2.470870 |
| H  | -0.782220 | 4.845520  | -1.251560 |
| H  | -2.756290 | -1.970870 | -3.400470 |
| H  | -2.390000 | 3.210300  | -2.704780 |
| C  | 0.677520  | -3.402230 | -0.672500 |
| C  | 1.154400  | 3.381050  | 0.242840  |
| C  | -1.721010 | 0.461580  | -2.338740 |
| C  | 3.533820  | -0.480640 | 1.931210  |
| H  | 0.614330  | -4.473670 | -0.833920 |
| H  | 1.223430  | 4.454110  | 0.391040  |
| H  | -2.552630 | 0.611020  | -3.019920 |
| H  | 4.365270  | -0.633640 | 2.612020  |
| O  | -0.167600 | 0.003640  | 1.206860  |
| S  | 2.510850  | 0.027620  | -1.966100 |
| C  | 2.688310  | 1.730250  | -2.613370 |
| H  | 3.016160  | 2.420220  | -1.830690 |
| H  | 3.458710  | 1.702400  | -3.391900 |
| H  | 1.757460  | 2.098920  | -3.051730 |
| C  | -1.435170 | -1.457210 | 2.034720  |
| H  | -1.408630 | -0.886190 | 2.954830  |
| H  | -0.672220 | -2.216770 | 1.922990  |
| C  | -2.551520 | -1.492250 | 1.236420  |
| H  | -2.561800 | -2.202440 | 0.412670  |
| C  | -3.720210 | -0.642250 | 1.342690  |
| C  | -4.794160 | -0.846000 | 0.445440  |
| C  | -3.845680 | 0.387670  | 2.305420  |
| C  | -5.945320 | -0.066560 | 0.511870  |
| H  | -4.711470 | -1.629160 | -0.303900 |
| C  | -4.995220 | 1.165900  | 2.367100  |
| H  | -3.034110 | 0.579730  | 3.000000  |
| C  | -6.051870 | 0.942640  | 1.473900  |
| H  | -6.759300 | -0.243060 | -0.185650 |
| H  | -5.072330 | 1.953070  | 3.111910  |
| H  | -6.948480 | 1.553560  | 1.527640  |

**TS1<sup>a</sup>** (conformer 1)

|    |           |           |           |
|----|-----------|-----------|-----------|
| Fe | 0.909060  | 0.076890  | -0.111470 |
| N  | 1.911340  | -1.537000 | 0.605170  |
| N  | 2.121670  | 1.295410  | 0.918100  |
| N  | -0.233420 | -1.175470 | -1.251730 |
| N  | 0.051580  | 1.657860  | -0.991960 |
| C  | 1.669110  | -2.860930 | 0.321650  |
| C  | 2.124450  | 2.667530  | 0.900430  |
| C  | 2.921590  | -1.523430 | 1.531150  |
| C  | 3.098780  | 0.924750  | 1.811260  |
| C  | -0.185140 | -2.548700 | -1.279930 |
| C  | 0.326780  | 2.983250  | -0.756540 |
| C  | -1.240580 | -0.810200 | -2.104960 |
| C  | -1.007380 | 1.639290  | -1.870780 |
| C  | 2.560650  | -3.701050 | 1.084070  |
| C  | 3.119440  | 3.177720  | 1.815880  |
| C  | 3.337560  | -2.871310 | 1.835340  |
| C  | 3.721080  | 2.097390  | 2.382760  |
| C  | -1.194360 | -3.061550 | -2.177520 |
| C  | -0.567000 | 3.820850  | -1.519390 |
| C  | -1.850650 | -1.982830 | -2.688850 |
| C  | -1.396930 | 2.987840  | -2.205980 |
| H  | 2.574290  | -4.782550 | 1.038810  |
| H  | 3.317180  | 4.228640  | 1.984220  |
| H  | 4.122650  | -3.129760 | 2.534470  |
| H  | 4.518540  | 2.073820  | 3.114440  |
| H  | -1.360550 | -4.112020 | -2.379780 |
| H  | -0.550920 | 4.903180  | -1.510820 |
| H  | -2.667050 | -1.963000 | -3.399510 |
| H  | -2.203170 | 3.243510  | -2.881720 |
| C  | 0.695460  | -3.336710 | -0.549860 |
| C  | 1.298850  | 3.460490  | 0.114270  |
| C  | -1.613090 | 0.501140  | -2.387090 |
| C  | 3.473160  | -0.379490 | 2.101800  |
| H  | 0.617250  | -4.413000 | -0.667970 |
| H  | 1.408530  | 4.536960  | 0.199450  |
| H  | -2.436550 | 0.647530  | -3.079060 |
| H  | 4.270950  | -0.519430 | 2.824500  |
| O  | -0.218450 | 0.064360  | 1.164200  |
| S  | 2.499540  | -0.179240 | -1.919190 |
| C  | 1.844290  | 0.591070  | -3.438920 |
| H  | 1.658440  | 1.658630  | -3.299530 |
| H  | 2.583920  | 0.446530  | -4.232640 |
| H  | 0.912210  | 0.104580  | -3.743580 |
| C  | -1.397930 | -1.390130 | 1.929370  |
| H  | -1.369130 | -0.868180 | 2.878480  |
| H  | -0.643550 | -2.153380 | 1.789810  |
| C  | -2.556520 | -1.444930 | 1.182260  |
| H  | -2.585400 | -2.136810 | 0.343500  |
| C  | -3.738370 | -0.625030 | 1.359280  |
| C  | -4.857410 | -0.849080 | 0.523500  |
| C  | -3.837700 | 0.395120  | 2.335530  |
| C  | -6.022850 | -0.100890 | 0.661580  |
| H  | -4.798010 | -1.624380 | -0.236530 |
| C  | -5.002520 | 1.142410  | 2.469140  |
| H  | -2.993040 | 0.605460  | 2.984090  |
| C  | -6.102570 | 0.898850  | 1.636450  |
| H  | -6.869810 | -0.294530 | 0.008950  |
| H  | -5.056370 | 1.922210  | 3.223990  |
| H  | -7.010300 | 1.485570  | 1.745680  |

**TS1<sup>d</sup>** (conformer 2)

|    |           |           |           |
|----|-----------|-----------|-----------|
| Fe | 0.885360  | 0.043199  | 0.099993  |
| N  | 1.559433  | -1.836812 | -0.189529 |
| N  | -0.321097 | -0.621111 | 1.565542  |
| N  | 2.277761  | 0.731103  | -1.195651 |
| N  | 0.359215  | 1.945454  | 0.536335  |
| C  | 2.501791  | -2.242588 | -1.102472 |
| C  | -1.215571 | 0.125004  | 2.294830  |
| C  | 1.156383  | -2.972717 | 0.469484  |
| C  | -0.477677 | -1.921968 | 1.986640  |
| C  | 3.111492  | -0.021470 | -1.984575 |
| C  | -0.637838 | 2.346151  | 1.391239  |
| C  | 2.499147  | 2.040326  | -1.545762 |
| C  | 0.835987  | 3.088813  | -0.057634 |
| C  | 2.685261  | -3.672246 | -1.027741 |
| C  | -1.953087 | -0.724990 | 3.196649  |
| C  | 1.854561  | -4.124490 | -0.048254 |
| C  | -1.491404 | -1.993649 | 3.009712  |
| C  | 3.886076  | 0.836112  | -2.849910 |
| C  | -0.789581 | 3.781442  | 1.340588  |
| C  | 3.508770  | 2.114878  | -2.575147 |
| C  | 0.126892  | 4.241704  | 0.445739  |
| H  | 3.373993  | -4.235551 | -1.644298 |
| H  | -2.715029 | -0.377347 | 3.882522  |
| H  | 1.715652  | -5.137488 | 0.307114  |
| H  | -1.798101 | -2.904897 | 3.507040  |
| H  | 4.619694  | 0.485642  | -3.564579 |
| H  | -1.506751 | 4.343880  | 1.924675  |
| H  | 3.865445  | 3.035604  | -3.018792 |
| H  | 0.318660  | 5.261683  | 0.138108  |
| C  | 3.215364  | -1.406104 | -1.952022 |
| C  | -1.380596 | 1.502539  | 2.206534  |
| C  | 1.837901  | 3.141175  | -1.016859 |
| C  | 0.211970  | -3.019558 | 1.486908  |
| H  | 3.927041  | -1.869991 | -2.627554 |
| H  | -2.134847 | 1.956356  | 2.841449  |
| H  | 2.114547  | 4.119395  | -1.397025 |
| H  | -0.013032 | -3.990060 | 1.917645  |
| O  | -0.274910 | 0.002954  | -1.113254 |
| S  | 2.720083  | 0.374360  | 1.762805  |
| C  | 1.996566  | 0.758329  | 3.397759  |
| H  | 1.393366  | -0.068184 | 3.781474  |
| H  | 2.830384  | 0.937862  | 4.085597  |
| H  | 1.385029  | 1.664177  | 3.357753  |
| C  | -1.503137 | -1.604496 | -1.683603 |
| H  | -1.604906 | -1.926306 | -0.655173 |
| H  | -0.674566 | -2.030514 | -2.235002 |
| C  | -2.539980 | -1.010461 | -2.360220 |
| H  | -2.412567 | -0.833246 | -3.426834 |
| C  | -3.790730 | -0.544803 | -1.795252 |
| C  | -4.762920 | 0.013435  | -2.657394 |
| C  | -4.097834 | -0.628210 | -0.415589 |
| C  | -5.986714 | 0.460990  | -2.169483 |
| H  | -4.542980 | 0.088659  | -3.719419 |
| C  | -5.321009 | -0.178785 | 0.068196  |
| H  | -3.372036 | -1.041897 | 0.277001  |
| C  | -6.272683 | 0.366347  | -0.803526 |
| H  | -6.718518 | 0.884672  | -2.851539 |
| H  | -5.536727 | -0.249757 | 1.130739  |
| H  | -7.226769 | 0.716022  | -0.419467 |

**TS1<sup>a</sup>** (conformer 2)

|    |           |           |           |
|----|-----------|-----------|-----------|
| Fe | 0.905660  | 0.118410  | 0.064450  |
| N  | 1.859090  | -1.456900 | -0.795850 |
| N  | 0.323100  | -1.103470 | 1.589560  |
| N  | 1.614210  | 1.332610  | -1.366010 |
| N  | 0.138360  | 1.691420  | 1.034240  |
| C  | 2.542770  | -1.445620 | -1.983430 |
| C  | -0.446670 | -0.752850 | 2.667620  |
| C  | 1.887830  | -2.756840 | -0.349420 |
| C  | 0.561850  | -2.452920 | 1.711390  |
| C  | 2.325690  | 0.963880  | -2.482810 |
| C  | -0.618100 | 1.664230  | 2.184060  |
| C  | 1.450680  | 2.692190  | -1.451140 |
| C  | 0.167980  | 3.004850  | 0.630340  |
| C  | 3.022720  | -2.770640 | -2.295320 |
| C  | -0.703750 | -1.909050 | 3.494840  |
| C  | 2.617340  | -3.583930 | -1.280380 |
| C  | -0.074850 | -2.962200 | 2.902930  |
| C  | 2.605510  | 2.123120  | -3.298740 |
| C  | -1.064860 | 2.995920  | 2.515300  |
| C  | 2.066950  | 3.195210  | -2.657130 |
| C  | -0.572810 | 3.827490  | 1.556180  |
| H  | 3.594520  | -3.025540 | -3.178470 |
| H  | -1.285730 | -1.895550 | 4.407560  |
| H  | 2.785610  | -4.646190 | -1.157380 |
| H  | -0.035280 | -3.994210 | 3.227410  |
| H  | 3.152050  | 2.098580  | -4.232860 |
| H  | -1.672930 | 3.242600  | 3.376280  |
| H  | 2.075720  | 4.236140  | -2.954060 |
| H  | -0.694910 | 4.899000  | 1.462980  |
| C  | 2.755720  | -0.322330 | -2.777520 |
| C  | -0.900310 | 0.535070  | 2.941230  |
| C  | 0.788790  | 3.479760  | -0.518120 |
| C  | 1.287340  | -3.225300 | 0.813960  |
| H  | 3.317630  | -0.461520 | -3.695800 |
| H  | -1.507480 | 0.671490  | 3.830740  |
| H  | 0.733520  | 4.546320  | -0.711780 |
| H  | 1.389960  | -4.282980 | 1.035760  |
| O  | -0.520590 | -0.146670 | -0.817310 |
| S  | 2.990280  | 0.247280  | 1.316410  |
| C  | 2.690020  | 1.058640  | 2.924130  |
| H  | 1.971990  | 0.483180  | 3.516950  |
| H  | 3.640610  | 1.084530  | 3.466490  |
| H  | 2.312900  | 2.076190  | 2.797410  |
| C  | -1.705010 | -1.812300 | -0.887670 |
| H  | -1.829100 | -1.804540 | 0.187770  |
| H  | -0.886600 | -2.413350 | -1.262780 |
| C  | -2.743060 | -1.484530 | -1.733000 |
| H  | -2.611760 | -1.680640 | -2.795870 |
| C  | -3.991070 | -0.847970 | -1.363220 |
| C  | -4.968850 | -0.625990 | -2.360840 |
| C  | -4.290220 | -0.437680 | -0.041660 |
| C  | -6.189310 | -0.031430 | -2.055090 |
| H  | -4.755680 | -0.930300 | -3.382700 |
| C  | -5.509570 | 0.158430  | 0.259590  |
| H  | -3.557930 | -0.580380 | 0.746910  |
| C  | -6.467090 | 0.363600  | -0.742360 |
| H  | -6.924830 | 0.126570  | -2.839050 |
| H  | -5.718080 | 0.468800  | 1.279890  |
| H  | -7.418340 | 0.829410  | -0.501010 |

Int1<sup>a</sup>

|    |           |           |           |
|----|-----------|-----------|-----------|
| Fe | -0.858760 | 0.051050  | -0.261280 |
| N  | -1.698730 | -1.461430 | 0.758260  |
| N  | -1.796770 | 1.373990  | 0.927230  |
| N  | 0.029670  | -1.266320 | -1.498350 |
| N  | -0.055290 | 1.572500  | -1.321930 |
| C  | -1.613840 | -2.802880 | 0.462860  |
| C  | -1.778360 | 2.743050  | 0.812510  |
| C  | -2.451020 | -1.364110 | 1.905670  |
| C  | -2.527700 | 1.090250  | 2.057490  |
| C  | -0.127850 | -2.634000 | -1.492610 |
| C  | -0.279370 | 2.913990  | -1.132140 |
| C  | 0.902570  | -0.981670 | -2.521220 |
| C  | 0.836120  | 1.473100  | -2.361780 |
| C  | -2.336930 | -3.567930 | 1.447020  |
| C  | -2.531340 | 3.336990  | 1.889620  |
| C  | -2.845710 | -2.678540 | 2.345980  |
| C  | -2.985990 | 2.314250  | 2.666550  |
| C  | 0.669010  | -3.223710 | -2.538460 |
| C  | 0.491650  | 3.681740  | -2.080530 |
| C  | 1.314390  | -2.202100 | -3.168810 |
| C  | 1.189500  | 2.789680  | -2.836070 |
| H  | -2.424890 | -4.646820 | 1.441150  |
| H  | -2.671180 | 4.401870  | 2.024690  |
| H  | -3.442770 | -2.875850 | 3.227100  |
| H  | -3.581950 | 2.364350  | 3.568820  |
| H  | 0.722100  | -4.285180 | -2.743940 |
| H  | 0.491620  | 4.762670  | -2.138140 |
| H  | 2.002480  | -2.250640 | -4.003060 |
| H  | 1.878590  | 2.984210  | -3.647880 |
| C  | -0.902260 | -3.355120 | -0.594160 |
| C  | -1.095070 | 3.467540  | -0.155500 |
| C  | 1.302920  | 0.289060  | -2.915130 |
| C  | -2.820650 | -0.180670 | 2.532160  |
| H  | -0.927350 | -4.434050 | -0.706600 |
| H  | -1.174310 | 4.549160  | -0.121010 |
| H  | 2.001300  | 0.360870  | -3.742460 |
| H  | -3.415030 | -0.255440 | 3.436880  |
| O  | 0.600750  | 0.072070  | 0.867820  |
| S  | -2.655000 | 0.057530  | -1.768110 |
| C  | -4.219680 | 0.026400  | -0.821820 |
| H  | -4.291690 | -0.870980 | -0.202310 |
| H  | -5.033450 | 0.016090  | -1.554280 |
| H  | -4.322050 | 0.912680  | -0.191080 |
| C  | 1.335590  | -1.055730 | 1.326600  |
| H  | 0.683700  | -1.708220 | 1.925580  |
| H  | 1.699190  | -1.646720 | 0.476310  |
| C  | 2.456950  | -0.538830 | 2.168530  |
| H  | 2.206200  | -0.262590 | 3.190880  |
| C  | 3.774470  | -0.260250 | 1.726060  |
| C  | 4.727820  | 0.268160  | 2.647150  |
| C  | 4.218730  | -0.494840 | 0.390870  |
| C  | 6.033600  | 0.533300  | 2.262400  |
| H  | 4.412680  | 0.459830  | 3.669980  |
| C  | 5.527480  | -0.222710 | 0.016160  |
| H  | 3.522310  | -0.880330 | -0.346840 |
| C  | 6.446070  | 0.289530  | 0.943870  |
| H  | 6.738550  | 0.933630  | 2.986210  |
| H  | 5.840520  | -0.406840 | -1.008270 |
| H  | 7.468360  | 0.499230  | 0.642610  |

TS-rotation<sup>a</sup>

|    |           |           |           |
|----|-----------|-----------|-----------|
| Fe | -0.818545 | 0.021998  | 0.235611  |
| N  | -1.559340 | 0.822289  | -1.445827 |
| N  | -0.153907 | 1.832191  | 0.805652  |
| N  | -1.547776 | -1.777683 | -0.288990 |
| N  | -0.139202 | -0.770631 | 1.966761  |
| C  | -2.325188 | 0.184767  | -2.396194 |
| C  | 0.452985  | 2.151777  | 1.996815  |
| C  | -1.381770 | 2.111778  | -1.893368 |
| C  | -0.155159 | 2.982725  | 0.051720  |
| C  | -2.321253 | -2.061288 | -1.392144 |
| C  | 0.456656  | -0.093657 | 3.003080  |
| C  | -1.389861 | -2.964293 | 0.387406  |
| C  | -0.164524 | -2.093679 | 2.334070  |
| C  | -2.641160 | 1.098453  | -3.464020 |
| C  | 0.830885  | 3.543233  | 1.998097  |
| C  | -2.047637 | 2.287137  | -3.158794 |
| C  | 0.464575  | 4.054913  | 0.789693  |
| C  | -2.652954 | -3.463263 | -1.411384 |
| C  | 0.814918  | -1.016256 | 4.053071  |
| C  | -2.068128 | -4.023974 | -0.315755 |
| C  | 0.439024  | -2.256229 | 3.634602  |
| H  | -3.233260 | 0.843026  | -4.333411 |
| H  | 1.323752  | 4.043005  | 2.822063  |
| H  | -2.056731 | 3.210922  | -3.722951 |
| H  | 0.588822  | 5.063480  | 0.416902  |
| H  | -3.251232 | -3.940492 | -2.176856 |
| H  | 1.299103  | -0.732522 | 4.978680  |
| H  | -2.090980 | -5.056619 | 0.007850  |
| H  | 0.544964  | -3.204115 | 4.146411  |
| C  | -2.700778 | -1.151708 | -2.368788 |
| C  | 0.720610  | 1.268247  | 3.034166  |
| C  | -0.724661 | -3.126461 | 1.595438  |
| C  | -0.705188 | 3.117036  | -1.215386 |
| H  | -3.308126 | -1.519552 | -3.189174 |
| H  | 1.206392  | 1.665948  | 3.919160  |
| H  | -0.678449 | -4.126643 | 2.013394  |
| H  | -0.639168 | 4.089090  | -1.692684 |
| O  | 0.805221  | -0.324685 | -0.564006 |
| S  | -2.843161 | 0.388328  | 1.325608  |
| C  | -3.424134 | 2.078974  | 0.946909  |
| H  | -3.600608 | 2.210390  | -0.123145 |
| H  | -4.371565 | 2.206769  | 1.480946  |
| H  | -2.715343 | 2.832778  | 1.296971  |
| C  | 1.006833  | -0.920919 | -1.813556 |
| H  | 0.461452  | -0.361774 | -2.597618 |
| H  | 0.562785  | -1.935022 | -1.827754 |
| C  | 2.442201  | -1.036942 | -2.243043 |
| H  | 2.538088  | -1.497901 | -3.226627 |
| C  | 3.649787  | -0.668765 | -1.607115 |
| C  | 4.883220  | -0.923806 | -2.288315 |
| C  | 3.742044  | -0.052774 | -0.319397 |
| C  | 6.106770  | -0.592044 | -1.727870 |
| H  | 4.847854  | -1.390758 | -3.270090 |
| C  | 4.975693  | 0.273445  | 0.228254  |
| H  | 2.827925  | 0.154425  | 0.221572  |
| C  | 6.168328  | 0.010991  | -0.461926 |
| H  | 7.022892  | -0.801484 | -2.274755 |
| H  | 5.013744  | 0.740747  | 1.209629  |
| H  | 7.127431  | 0.270921  | -0.022833 |



TS2<sup>a</sup>

|    |           |           |           |
|----|-----------|-----------|-----------|
| Fe | -0.896700 | 0.015870  | 0.204660  |
| N  | -0.197160 | 1.506020  | 1.369820  |
| N  | -0.008930 | -1.350200 | 1.394030  |
| N  | -1.800620 | 1.385470  | -0.973660 |
| N  | -1.615590 | -1.472190 | -0.948120 |
| C  | -0.417020 | 2.855520  | 1.218380  |
| C  | 0.005980  | -2.713580 | 1.223570  |
| C  | 0.575550  | 1.365520  | 2.499740  |
| C  | 0.750780  | -1.093090 | 2.510410  |
| C  | -1.802830 | 2.750540  | -0.813220 |
| C  | -1.382770 | -2.818950 | -0.805310 |
| C  | -2.565610 | 1.126640  | -2.086800 |
| C  | -2.393970 | -1.332440 | -2.073050 |
| C  | 0.239880  | 3.582470  | 2.275290  |
| C  | 0.786630  | -3.332440 | 2.267010  |
| C  | 0.855390  | 2.660100  | 3.067920  |
| C  | 1.246760  | -2.328590 | 3.064910  |
| C  | -2.582220 | 3.368110  | -1.857450 |
| C  | -2.040090 | -3.547420 | -1.862240 |
| C  | -3.054310 | 2.362330  | -2.646320 |
| C  | -2.668250 | -2.626660 | -2.646230 |
| H  | 0.220760  | 4.659530  | 2.382410  |
| H  | 0.951470  | -4.398410 | 2.359120  |
| H  | 1.445580  | 2.823390  | 3.960590  |
| H  | 1.868440  | -2.398640 | 3.948340  |
| H  | -2.737950 | 4.434780  | -1.957050 |
| H  | -2.011860 | -4.623730 | -1.974890 |
| H  | -3.678640 | 2.431720  | -3.527940 |
| H  | -3.262100 | -2.790020 | -3.536440 |
| C  | -1.160990 | 3.444690  | 0.204250  |
| C  | -0.628830 | -3.407260 | 0.201900  |
| C  | -2.843730 | -0.131020 | -2.605120 |
| C  | 1.023490  | 0.164090  | 3.033150  |
| H  | -1.251420 | 4.525990  | 0.209980  |
| H  | -0.529950 | -4.487800 | 0.190630  |
| H  | -3.459340 | -0.178890 | -3.497540 |
| H  | 1.634280  | 0.211880  | 3.928880  |
| O  | 0.683200  | 0.058050  | -0.898830 |
| S  | -2.895130 | 0.005420  | 1.579040  |
| C  | -3.353900 | -1.734120 | 1.925910  |
| H  | -2.557150 | -2.256650 | 2.461850  |
| H  | -4.249570 | -1.720670 | 2.555870  |
| H  | -3.581780 | -2.277530 | 1.005020  |
| C  | 1.374070  | 1.220460  | -1.311550 |
| H  | 1.726890  | 1.816150  | -0.460430 |
| H  | 0.744540  | 1.865560  | -1.941270 |
| C  | 2.481860  | 0.613280  | -2.098640 |
| H  | 2.220140  | 0.269700  | -3.097130 |
| C  | 3.775280  | 0.284780  | -1.621190 |
| C  | 4.687400  | -0.382250 | -2.489680 |
| C  | 4.229050  | 0.615100  | -0.311460 |
| C  | 5.976950  | -0.685440 | -2.079320 |
| H  | 4.356770  | -0.647530 | -3.490490 |
| C  | 5.518990  | 0.300700  | 0.091170  |
| H  | 3.555580  | 1.106340  | 0.382810  |
| C  | 6.401210  | -0.346300 | -0.786590 |
| H  | 6.657070  | -1.190230 | -2.759470 |
| H  | 5.846460  | 0.556570  | 1.094920  |
| H  | 7.409830  | -0.587480 | -0.463840 |

[ 2 + Fe(III)-Porph ]<sup>d</sup> (product complex)

|    |           |           |           |
|----|-----------|-----------|-----------|
| Fe | 0.894420  | -0.030930 | 0.306260  |
| N  | 2.157270  | -0.273150 | -1.249610 |
| N  | 0.530300  | -2.005410 | 0.349690  |
| N  | 1.103830  | 1.970990  | 0.109900  |
| N  | -0.532560 | 0.239260  | 1.696320  |
| C  | 2.857320  | 0.696490  | -1.929620 |
| C  | -0.366050 | -2.679490 | 1.145720  |
| C  | 2.584940  | -1.474930 | -1.763070 |
| C  | 1.174280  | -2.967550 | -0.390810 |
| C  | 1.949020  | 2.651760  | -0.737670 |
| C  | -1.290200 | -0.724420 | 2.322480  |
| C  | 0.532920  | 2.928100  | 0.918070  |
| C  | -0.892320 | 1.434590  | 2.274940  |
| C  | 3.732440  | 0.092210  | -2.905540 |
| C  | -0.282360 | -4.100010 | 0.903070  |
| C  | 3.565780  | -1.255160 | -2.800230 |
| C  | 0.677020  | -4.279280 | -0.046730 |
| C  | 1.892870  | 4.068440  | -0.470440 |
| C  | -2.150830 | -0.121290 | 3.311150  |
| C  | 1.017240  | 4.239640  | 0.558800  |
| C  | -1.900280 | 1.217280  | 3.285540  |
| H  | 4.383450  | 0.642870  | -3.572760 |
| H  | -0.887940 | -4.846160 | 1.401830  |
| H  | 4.050680  | -2.041710 | -3.364620 |
| H  | 1.022290  | -5.203870 | -0.492020 |
| H  | 2.459310  | 4.818760  | -1.007470 |
| H  | -2.848320 | -0.666440 | 3.934410  |
| H  | 0.714100  | 5.160450  | 1.041130  |
| H  | -2.351100 | 2.000020  | 3.882570  |
| C  | 2.760110  | 2.063870  | -1.701110 |
| C  | -1.226010 | -2.087420 | 2.062070  |
| C  | -0.392440 | 2.684270  | 1.926230  |
| C  | 2.137070  | -2.728330 | -1.364440 |
| H  | 3.378790  | 2.720010  | -2.305430 |
| H  | -1.883170 | -2.739300 | 2.629230  |
| H  | -0.766960 | 3.541740  | 2.476900  |
| H  | 2.560850  | -3.591840 | -1.868010 |
| O  | -0.775470 | 0.009740  | -1.232260 |
| S  | 2.587090  | -0.114610 | 1.764530  |
| C  | 2.109640  | -1.188610 | 3.169600  |
| H  | 1.906320  | -2.210200 | 2.839390  |
| H  | 2.956060  | -1.202910 | 3.864030  |
| H  | 1.232090  | -0.797780 | 3.690380  |
| C  | -0.832840 | 0.858250  | -2.399760 |
| H  | -1.103300 | 0.331780  | -3.312480 |
| H  | -0.023310 | 1.578200  | -2.478400 |
| C  | -1.833380 | 1.006850  | -1.326180 |
| H  | -1.689260 | 1.838830  | -0.641090 |
| C  | -3.229870 | 0.499350  | -1.433580 |
| C  | -4.283950 | 1.305860  | -0.984750 |
| C  | -3.516500 | -0.755020 | -1.991810 |
| C  | -5.606430 | 0.874480  | -1.106430 |
| H  | -4.068310 | 2.274790  | -0.540790 |
| C  | -4.837310 | -1.187980 | -2.105700 |
| H  | -2.702980 | -1.394770 | -2.321280 |
| C  | -5.886180 | -0.373390 | -1.667480 |
| H  | -6.415180 | 1.510330  | -0.757070 |
| H  | -5.048530 | -2.163450 | -2.535210 |
| H  | -6.914330 | -0.712610 | -1.758290 |

[ 2 + Fe(III)-Porph ]<sup>a</sup> (product complex)

Int2<sup>d</sup>

|    |           |           |           |    |           |           |           |
|----|-----------|-----------|-----------|----|-----------|-----------|-----------|
| Fe | 1.226120  | -0.033950 | 0.375830  | Fe | -0.927160 | 0.120630  | 0.025080  |
| N  | 1.850440  | 1.301530  | -0.998890 | N  | -0.512630 | 1.506470  | -1.384430 |
| N  | 1.771290  | -1.519680 | -0.869290 | N  | -0.370280 | 1.443620  | 1.446370  |
| N  | 0.238210  | 1.452870  | 1.325340  | N  | -1.425250 | -1.232390 | -1.400640 |
| N  | 0.162180  | -1.369190 | 1.456700  | N  | -1.283320 | -1.295810 | 1.430080  |
| C  | 1.778650  | 2.677470  | -0.909030 | C  | -0.650200 | 1.344980  | -2.738650 |
| C  | 1.619530  | -2.874810 | -0.656670 | C  | -0.373470 | 1.221470  | 2.798870  |
| C  | 2.579750  | 1.043680  | -2.141880 | C  | -0.025850 | 2.775120  | -1.196430 |
| C  | 2.510210  | -1.408430 | -2.029320 | C  | 0.097610  | 2.720380  | 1.267690  |
| C  | 0.386990  | 2.808580  | 1.111880  | C  | -1.455750 | -0.998750 | -2.752880 |
| C  | 0.228490  | -2.744070 | 1.363500  | C  | -1.176430 | -1.123220 | 2.787370  |
| C  | -0.563200 | 1.341150  | 2.443130  | C  | -1.870530 | -2.520630 | -1.223740 |
| C  | -0.632740 | -1.111710 | 2.553770  | C  | -1.744330 | -2.576830 | 1.241170  |
| C  | 2.475980  | 3.288420  | -2.009400 | C  | -0.247430 | 2.552340  | -3.427530 |
| C  | 2.277070  | -3.622120 | -1.696000 | C  | 0.097890  | 2.397940  | 3.497660  |
| C  | 2.970810  | 2.275270  | -2.775230 | C  | 0.142270  | 3.439100  | -2.470380 |
| C  | 2.827370  | -2.712850 | -2.548720 | C  | 0.392830  | 3.327340  | 2.547080  |
| C  | -0.335760 | 3.555280  | 2.107230  | C  | -1.922370 | -2.176470 | -3.450050 |
| C  | -0.537480 | -3.356140 | 2.417140  | C  | -1.569930 | -2.333280 | 3.474350  |
| C  | -0.927010 | 2.645300  | 2.931590  | C  | -2.178780 | -3.120500 | -2.502000 |
| C  | -1.073380 | -2.343450 | 3.154530  | C  | -1.920730 | -3.235180 | 2.515550  |
| H  | 2.558890  | 4.356280  | -2.165870 | H  | -0.264180 | 2.683070  | -4.502470 |
| H  | 2.296420  | -4.702650 | -1.755990 | H  | 0.188050  | 2.480470  | 4.573740  |
| H  | 3.545560  | 2.339040  | -3.690300 | H  | 0.510870  | 4.449700  | -2.595390 |
| H  | 3.393960  | -2.891840 | -3.453450 | H  | 0.774350  | 4.332130  | 2.679980  |
| H  | -0.379630 | 4.635890  | 2.151920  | H  | -2.034350 | -2.251900 | -4.524600 |
| H  | -0.646600 | -4.424140 | 2.555170  | H  | -1.572250 | -2.457590 | 4.550170  |
| H  | -1.555970 | 2.823910  | 3.794220  | H  | -2.545710 | -4.130420 | -2.636750 |
| H  | -1.713400 | -2.406900 | 4.025180  | H  | -2.271770 | -4.251920 | 2.640960  |
| C  | 1.110240  | 3.385690  | 0.078820  | C  | -1.092810 | 0.190270  | -3.378300 |
| C  | 0.914770  | -3.451930 | 0.388760  | C  | -0.752050 | 0.037860  | 3.426500  |
| C  | -0.971200 | 0.148870  | 3.023180  | C  | -2.016490 | -3.156610 | 0.005410  |
| C  | 2.894540  | -0.217130 | -2.626480 | C  | 0.266220  | 3.348080  | 0.037390  |
| H  | 1.139740  | 4.469210  | 0.028370  | H  | -1.159360 | 0.219440  | -4.461930 |
| H  | 0.879570  | -4.535410 | 0.434830  | H  | -0.710090 | 0.017820  | 4.511560  |
| H  | -1.603200 | 0.206340  | 3.903330  | H  | -2.381630 | -4.179190 | 0.000760  |
| H  | 3.476700  | -0.275420 | -3.540320 | H  | 0.646770  | 4.365160  | 0.040850  |
| O  | -1.874830 | -0.175460 | -1.788150 | O  | 0.982590  | -0.419980 | -0.078810 |
| S  | 3.165780  | -0.026310 | 1.808870  | S  | -3.137380 | 0.745370  | 0.157140  |
| C  | 4.629640  | -0.061440 | 0.696100  | C  | -3.260140 | 2.574990  | 0.189130  |
| H  | 4.655200  | 0.821720  | 0.051820  | H  | -2.837600 | 3.018550  | -0.716740 |
| H  | 5.532880  | -0.071030 | 1.313680  | H  | -4.320790 | 2.840770  | 0.248040  |
| H  | 4.624700  | -0.957430 | 0.069300  | H  | -2.745340 | 2.993930  | 1.058270  |
| C  | -2.089430 | 1.217220  | -2.062230 | C  | 1.333530  | -1.715820 | -0.137010 |
| H  | -2.654060 | 1.425270  | -2.970460 | H  | 0.880030  | -2.275810 | -0.998680 |
| H  | -1.233840 | 1.864000  | -1.873320 | H  | 0.928690  | -2.338350 | 0.707680  |
| C  | -2.772940 | 0.559380  | -0.930920 | C  | 2.737690  | -2.116240 | -0.180990 |
| H  | -2.369230 | 0.745770  | 0.063900  | H  | 2.877920  | -3.195750 | -0.235190 |
| C  | -4.217420 | 0.188080  | -0.972110 | C  | 3.899400  | -1.325820 | -0.157690 |
| C  | -5.052650 | 0.545700  | 0.094520  | C  | 5.170850  | -1.973740 | -0.209470 |
| C  | -4.761490 | -0.501750 | -2.064500 | C  | 3.845040  | 0.099160  | -0.082700 |
| C  | -6.413740 | 0.235260  | 0.063270  | C  | 6.335390  | -1.229650 | -0.187370 |
| H  | -4.635320 | 1.069690  | 0.951510  | H  | 5.209580  | -3.057600 | -0.266410 |
| C  | -6.120400 | -0.816030 | -2.093120 | C  | 5.023630  | 0.829570  | -0.060450 |
| H  | -4.109980 | -0.803360 | -2.879320 | H  | 2.870570  | 0.570400  | -0.043630 |
| C  | -6.951650 | -0.445700 | -1.031460 | C  | 6.260050  | 0.171720  | -0.112670 |
| H  | -7.051100 | 0.519820  | 0.896140  | H  | 7.302170  | -1.720570 | -0.226970 |
| H  | -6.530740 | -1.354890 | -2.943020 | H  | 4.990250  | 1.912770  | -0.002740 |
| H  | -8.009620 | -0.692230 | -1.054860 | H  | 7.177020  | 0.753870  | -0.095130 |

Int2<sup>MECP</sup>

|    |           |           |           |
|----|-----------|-----------|-----------|
| Fe | 0.958688  | 0.150999  | -0.040172 |
| N  | 1.029034  | -1.070447 | 1.573453  |
| N  | 0.336814  | 1.671864  | 1.137362  |
| N  | 1.483027  | -1.403118 | -1.234206 |
| N  | 0.811162  | 1.344303  | -1.664009 |
| C  | 1.425850  | -2.386964 | 1.593607  |
| C  | 0.061700  | 2.957998  | 0.742528  |
| C  | 0.725005  | -0.737738 | 2.871398  |
| C  | 0.120644  | 1.628566  | 2.493288  |
| C  | 1.822772  | -2.673054 | -0.829621 |
| C  | 0.478641  | 2.677504  | -1.676023 |
| C  | 1.635729  | -1.378230 | -2.598654 |
| C  | 1.051115  | 0.993783  | -2.970042 |
| C  | 1.372359  | -2.896646 | 2.942786  |
| C  | -0.335860 | 3.750167  | 1.882141  |
| C  | 0.934538  | -1.875623 | 3.733795  |
| C  | -0.302604 | 2.925232  | 2.966851  |
| C  | 2.192580  | -3.471871 | -1.973587 |
| C  | 0.515235  | 3.182939  | -3.027632 |
| C  | 2.073276  | -2.670341 | -3.070035 |
| C  | 0.866751  | 2.138573  | -3.829891 |
| H  | 1.635700  | -3.906776 | 3.230156  |
| H  | -0.604198 | 4.798188  | 1.839587  |
| H  | 0.767359  | -1.876255 | 4.803583  |
| H  | -0.536267 | 3.157624  | 3.998270  |
| H  | 2.501088  | -4.508650 | -1.926589 |
| H  | 0.294843  | 4.204915  | -3.308556 |
| H  | 2.265278  | -2.914204 | -4.107334 |
| H  | 0.995773  | 2.127508  | -4.904794 |
| C  | 1.803208  | -3.134971 | 0.481751  |
| C  | 0.133819  | 3.435366  | -0.562217 |
| C  | 1.427641  | -0.269832 | -3.413525 |
| C  | 0.291396  | 0.511439  | 3.304472  |
| H  | 2.095543  | -4.166740 | 0.651606  |
| H  | -0.110467 | 4.480399  | -0.725700 |
| H  | 1.588807  | -0.396868 | -4.479564 |
| H  | 0.086955  | 0.628563  | 4.364279  |
| O  | -1.142966 | -0.382399 | -0.295331 |
| S  | 3.425225  | 0.786121  | 0.217688  |
| C  | 3.740119  | 1.038020  | 2.012963  |
| H  | 3.550199  | 0.120720  | 2.579725  |
| H  | 4.785713  | 1.326629  | 2.163737  |
| H  | 3.101601  | 1.829196  | 2.418951  |
| C  | -1.557980 | -1.649066 | -0.288467 |
| H  | -1.205726 | -2.245883 | 0.607716  |
| H  | -1.113925 | -2.294549 | -1.095161 |
| C  | -2.973175 | -2.021627 | -0.287036 |
| H  | -3.141563 | -3.098575 | -0.301368 |
| C  | -4.111317 | -1.196082 | -0.237004 |
| C  | -5.404239 | -1.798318 | -0.206323 |
| C  | -4.002280 | 0.226449  | -0.217497 |
| C  | -6.539327 | -1.010571 | -0.157659 |
| H  | -5.483872 | -2.881601 | -0.221713 |
| C  | -5.151896 | 1.001815  | -0.167818 |
| H  | -3.008655 | 0.657258  | -0.240472 |
| C  | -6.411508 | 0.388929  | -0.138013 |
| H  | -7.523749 | -1.466389 | -0.134079 |
| H  | -5.077268 | 2.084436  | -0.152021 |
| H  | -7.305740 | 1.004588  | -0.099050 |

Int2<sup>†</sup>

|    |           |           |           |
|----|-----------|-----------|-----------|
| Fe | 0.959110  | 0.150820  | -0.039790 |
| N  | 1.029140  | -1.070380 | 1.573690  |
| N  | 0.337130  | 1.671720  | 1.137660  |
| N  | 1.483430  | -1.402940 | -1.234250 |
| N  | 0.811600  | 1.344110  | -1.664090 |
| C  | 1.425900  | -2.386740 | 1.593660  |
| C  | 0.061910  | 2.957680  | 0.742590  |
| C  | 0.725130  | -0.737650 | 2.871510  |
| C  | 0.120880  | 1.628490  | 2.493480  |
| C  | 1.822880  | -2.672780 | -0.829660 |
| C  | 0.478860  | 2.677240  | -1.675970 |
| C  | 1.635920  | -1.378100 | -2.598650 |
| C  | 1.051380  | 0.993710  | -2.970090 |
| C  | 1.372350  | -2.896520 | 2.942790  |
| C  | -0.335770 | 3.749930  | 1.882080  |
| C  | 0.934610  | -1.875570 | 3.733870  |
| C  | -0.302560 | 2.925250  | 2.966890  |
| C  | 2.192440  | -3.471750 | -1.973580 |
| C  | 0.515240  | 3.182670  | -3.027600 |
| C  | 2.073210  | -2.670310 | -3.070050 |
| C  | 0.866730  | 2.138540  | -3.829950 |
| H  | 1.635690  | -3.906700 | 3.230050  |
| H  | -0.604150 | 4.798010  | 1.839410  |
| H  | 0.767420  | -1.876210 | 4.803650  |
| H  | -0.536270 | 3.157660  | 3.998290  |
| H  | 2.500900  | -4.508560 | -1.926550 |
| H  | 0.294730  | 4.204770  | -3.308480 |
| H  | 2.265150  | -2.914230 | -4.107370 |
| H  | 0.995610  | 2.127450  | -4.904910 |
| C  | 1.803240  | -3.134730 | 0.481770  |
| C  | 0.134020  | 3.434880  | -0.562190 |
| C  | 1.427720  | -0.269820 | -3.413600 |
| C  | 0.291520  | 0.511530  | 3.304590  |
| H  | 2.095400  | -4.166390 | 0.651550  |
| H  | -0.110420 | 4.479870  | -0.725670 |
| H  | 1.588680  | -0.396940 | -4.479570 |
| H  | 0.087000  | 0.628590  | 4.364320  |
| O  | -1.140590 | -0.382360 | -0.294680 |
| S  | 3.418110  | 0.784630  | 0.218210  |
| C  | 3.738240  | 1.037530  | 2.012220  |
| H  | 3.549950  | 0.120530  | 2.579980  |
| H  | 4.784360  | 1.325960  | 2.159970  |
| H  | 3.101270  | 1.829370  | 2.419280  |
| C  | -1.556760 | -1.648520 | -0.288260 |
| H  | -1.205310 | -2.245810 | 0.607970  |
| H  | -1.113330 | -2.294260 | -1.095070 |
| C  | -2.972390 | -2.020690 | -0.286970 |
| H  | -3.140490 | -3.097560 | -0.301430 |
| C  | -4.110820 | -1.195850 | -0.236900 |
| C  | -5.403970 | -1.798330 | -0.206220 |
| C  | -4.002280 | 0.226650  | -0.217410 |
| C  | -6.539120 | -1.010590 | -0.157550 |
| H  | -5.483740 | -2.881550 | -0.221580 |
| C  | -5.151820 | 1.001840  | -0.167740 |
| H  | -3.008540 | 0.657480  | -0.240390 |
| C  | -6.411420 | 0.388960  | -0.137910 |
| H  | -7.523570 | -1.466390 | -0.133930 |
| H  | -5.077260 | 2.084520  | -0.151950 |
| H  | -7.305670 | 1.004550  | -0.098940 |

TS3<sup>d</sup>

|    |           |           |           |
|----|-----------|-----------|-----------|
| Fe | 0.895670  | 0.181770  | 0.233150  |
| N  | 1.845810  | -0.780910 | -1.266590 |
| N  | 0.754200  | -1.575580 | 1.220610  |
| N  | 0.951380  | 1.921870  | -0.798600 |
| N  | -0.127950 | 1.130590  | 1.699750  |
| C  | 2.317140  | -0.205430 | -2.421260 |
| C  | 0.184690  | -1.760430 | 2.457040  |
| C  | 2.194700  | -2.109960 | -1.331370 |
| C  | 1.239260  | -2.803660 | 0.834930  |
| C  | 1.540390  | 2.112740  | -2.021790 |
| C  | -0.573090 | 0.563050  | 2.865610  |
| C  | 0.448140  | 3.140170  | -0.421560 |
| C  | -0.487200 | 2.452380  | 1.755110  |
| C  | 2.979230  | -1.198130 | -3.236440 |
| C  | 0.308610  | -3.143040 | 2.858780  |
| C  | 2.901930  | -2.379460 | -2.561790 |
| C  | 0.960790  | -3.790380 | 1.852420  |
| C  | 1.403110  | 3.494090  | -2.431040 |
| C  | -1.232890 | 1.557970  | 3.683760  |
| C  | 0.724850  | 4.131560  | -1.437660 |
| C  | -1.180130 | 2.730470  | 2.993830  |
| H  | 3.436570  | -0.999390 | -4.197730 |
| H  | -0.061040 | -3.548050 | 3.792640  |
| H  | 3.283000  | -3.350090 | -2.853860 |
| H  | 1.237810  | -4.835400 | 1.789970  |
| H  | 1.782080  | 3.901730  | -3.359980 |
| H  | -1.673440 | 1.364090  | 4.653870  |
| H  | 0.430570  | 5.172100  | -1.379840 |
| H  | -1.567400 | 3.700700  | 3.279080  |
| C  | 2.176310  | 1.132600  | -2.777310 |
| C  | -0.431190 | -0.774310 | 3.222400  |
| C  | -0.224700 | 3.397110  | 0.768300  |
| C  | 1.908070  | -3.061840 | -0.357400 |
| H  | 2.599810  | 1.438030  | -3.729560 |
| H  | -0.837260 | -1.076490 | 4.183290  |
| H  | -0.566070 | 4.413070  | 0.942540  |
| H  | 2.241020  | -4.079710 | -0.536610 |
| O  | -0.901540 | -0.147670 | -0.635970 |
| S  | 2.846590  | 0.769730  | 1.270890  |
| C  | 3.975370  | -0.674080 | 1.331410  |
| H  | 4.210060  | -1.038890 | 0.327930  |
| H  | 4.903630  | -0.350750 | 1.813900  |
| H  | 3.544920  | -1.493760 | 1.913180  |
| C  | -1.220620 | -1.323150 | -1.139910 |
| H  | -1.454430 | -2.149650 | -0.323000 |
| H  | -0.447020 | -1.853990 | -1.722520 |
| C  | -2.558460 | -1.683080 | -1.557240 |
| H  | -2.618280 | -2.668090 | -2.018120 |
| C  | -3.785220 | -1.002940 | -1.323130 |
| C  | -4.995810 | -1.648290 | -1.691870 |
| C  | -3.833400 | 0.307850  | -0.776930 |
| C  | -6.212090 | -1.005300 | -1.524130 |
| H  | -4.957470 | -2.649050 | -2.112950 |
| C  | -5.059680 | 0.937640  | -0.608950 |
| H  | -2.903410 | 0.786140  | -0.495890 |
| C  | -6.243180 | 0.286870  | -0.980220 |
| H  | -7.135460 | -1.498940 | -1.809660 |
| H  | -5.100960 | 1.938290  | -0.190270 |
| H  | -7.197200 | 0.788840  | -0.846350 |

TS3<sup>a</sup>

|    |           |           |           |
|----|-----------|-----------|-----------|
| Fe | 0.986040  | 0.145460  | -0.013110 |
| N  | 0.947910  | -1.099940 | 1.582740  |
| N  | 0.314460  | 1.654410  | 1.149360  |
| N  | 1.536530  | -1.401970 | -1.200660 |
| N  | 0.905520  | 1.353880  | -1.631590 |
| C  | 1.321290  | -2.423660 | 1.604660  |
| C  | 0.065480  | 2.946970  | 0.756360  |
| C  | 0.590050  | -0.778340 | 2.870200  |
| C  | 0.038880  | 1.599980  | 2.494500  |
| C  | 1.838750  | -2.682190 | -0.797530 |
| C  | 0.578950  | 2.688360  | -1.645010 |
| C  | 1.755180  | -1.362470 | -2.556080 |
| C  | 1.201020  | 1.015610  | -2.929200 |
| C  | 1.194520  | -2.949200 | 2.942410  |
| C  | -0.373540 | 3.730910  | 1.885780  |
| C  | 0.738330  | -1.930500 | 3.725860  |
| C  | -0.392860 | 2.895400  | 2.962650  |
| C  | 2.254840  | -3.470590 | -1.932190 |
| C  | 0.675300  | 3.206780  | -2.988690 |
| C  | 2.200070  | -2.653460 | -3.022250 |
| C  | 1.058350  | 2.169320  | -3.785070 |
| H  | 1.426510  | -3.967460 | 3.228150  |
| H  | -0.632140 | 4.781380  | 1.842150  |
| H  | 0.520410  | -1.941460 | 4.786400  |
| H  | -0.669320 | 3.119270  | 3.985290  |
| H  | 2.546150  | -4.512250 | -1.884090 |
| H  | 0.470240  | 4.232320  | -3.268670 |
| H  | 2.439050  | -2.886740 | -4.052190 |
| H  | 1.234180  | 2.167960  | -4.853390 |
| C  | 1.744150  | -3.162580 | 0.504190  |
| C  | 0.192950  | 3.437160  | -0.539010 |
| C  | 1.593090  | -0.244480 | -3.367890 |
| C  | 0.158440  | 0.472470  | 3.299710  |
| H  | 2.012180  | -4.200800 | 0.673610  |
| H  | -0.038610 | 4.485200  | -0.701360 |
| H  | 1.802710  | -0.361770 | -4.426460 |
| H  | -0.091680 | 0.580480  | 4.350520  |
| O  | -1.136560 | -0.358820 | -0.393350 |
| S  | 3.425680  | 0.745370  | 0.353100  |
| C  | 3.653060  | 1.038170  | 2.155240  |
| H  | 3.421080  | 0.138040  | 2.733630  |
| H  | 4.694340  | 1.315260  | 2.350470  |
| H  | 3.007830  | 1.848940  | 2.508100  |
| C  | -1.575600 | -1.602090 | -0.422480 |
| H  | -1.568420 | -2.129000 | 0.618860  |
| H  | -0.959660 | -2.335290 | -0.987540 |
| C  | -2.981840 | -1.974000 | -0.506800 |
| H  | -3.146220 | -3.048960 | -0.573940 |
| C  | -4.127070 | -1.151240 | -0.380650 |
| C  | -5.412860 | -1.760310 | -0.355030 |
| C  | -4.026430 | 0.266880  | -0.319390 |
| C  | -6.554410 | -0.980370 | -0.276990 |
| H  | -5.488440 | -2.843040 | -0.403170 |
| C  | -5.179930 | 1.035130  | -0.236560 |
| H  | -3.037550 | 0.708610  | -0.333420 |
| C  | -6.436770 | 0.417070  | -0.216070 |
| H  | -7.535120 | -1.444840 | -0.260900 |
| H  | -5.108580 | 2.117240  | -0.188640 |
| H  | -7.333760 | 1.026570  | -0.152270 |

[ 3 + Fe(III)-Porph ]<sup>d</sup> (product complex)

|    |           |           |           |
|----|-----------|-----------|-----------|
| Fe | -0.893930 | -0.069950 | 0.368810  |
| N  | -1.805120 | 0.834540  | -1.180670 |
| N  | -0.206480 | 1.717560  | 0.978230  |
| N  | -1.411150 | -1.878780 | -0.367250 |
| N  | 0.186890  | -0.998780 | 1.797180  |
| C  | -2.610520 | 0.230360  | -2.118980 |
| C  | 0.550120  | 1.956310  | 2.100220  |
| C  | -1.827730 | 2.179800  | -1.473930 |
| C  | -0.428940 | 2.946820  | 0.402990  |
| C  | -2.275630 | -2.112910 | -1.411700 |
| C  | 0.882100  | -0.385880 | 2.811080  |
| C  | -1.083620 | -3.116620 | 0.135800  |
| C  | 0.312230  | -2.349380 | 2.015470  |
| C  | -3.149510 | 1.217700  | -3.023400 |
| C  | 0.804690  | 3.371290  | 2.238220  |
| C  | -2.657870 | 2.425510  | -2.628020 |
| C  | 0.203330  | 3.985110  | 1.181450  |
| C  | -2.486780 | -3.531760 | -1.576450 |
| C  | 1.461160  | -1.376190 | 3.689630  |
| C  | -1.742320 | -4.154320 | -0.620640 |
| C  | 1.112460  | -2.594740 | 3.192440  |
| H  | -3.809950 | 0.996490  | -3.852450 |
| H  | 1.380050  | 3.816950  | 3.039870  |
| H  | -2.834220 | 3.401350  | -3.062700 |
| H  | 0.178910  | 5.039460  | 0.936560  |
| H  | -3.121510 | -3.975320 | -2.333280 |
| H  | 2.059660  | -1.148780 | 4.562830  |
| H  | -1.641500 | -5.214860 | -0.427320 |
| H  | 1.361680  | -3.577150 | 3.573270  |
| C  | -2.844270 | -1.136800 | -2.222010 |
| C  | 1.043990  | 0.985770  | 2.964420  |
| C  | -0.265940 | -3.344210 | 1.236170  |
| C  | -1.172570 | 3.168620  | -0.749930 |
| H  | -3.504370 | -1.470640 | -3.016710 |
| H  | 1.628980  | 1.326640  | 3.813140  |
| H  | -0.090500 | -4.375450 | 1.526600  |
| H  | -1.273040 | 4.193370  | -1.094090 |
| O  | 0.952130  | -0.169410 | -0.847930 |
| S  | -2.697400 | -0.041110 | 1.692210  |
| C  | -3.494110 | 1.604670  | 1.575540  |
| H  | -3.836110 | 1.810650  | 0.558190  |
| H  | -4.360850 | 1.591100  | 2.244430  |
| H  | -2.814680 | 2.399230  | 1.893640  |
| C  | 1.024510  | -0.509360 | -2.020190 |
| H  | 2.134440  | 0.074600  | -3.699070 |
| H  | 0.112070  | -0.805440 | -2.562430 |
| C  | 2.304560  | -0.557030 | -2.813870 |
| H  | 2.377870  | -1.581140 | -3.209990 |
| C  | 3.555090  | -0.153390 | -2.069660 |
| C  | 4.322630  | -1.111020 | -1.393770 |
| C  | 3.962490  | 1.186820  | -2.034980 |
| C  | 5.472150  | -0.737330 | -0.694470 |
| H  | 4.021410  | -2.155760 | -1.418130 |
| C  | 5.111540  | 1.563450  | -1.336750 |
| H  | 3.379590  | 1.939330  | -2.561080 |
| C  | 5.869590  | 0.601610  | -0.664260 |
| H  | 6.058130  | -1.492410 | -0.177510 |
| H  | 5.415790  | 2.606490  | -1.321670 |
| H  | 6.765710  | 0.893030  | -0.123300 |

[ 3 + Fe(III)-Porph ]<sup>a</sup> (product complex)

|    |           |           |           |
|----|-----------|-----------|-----------|
| Fe | 1.166030  | 0.029840  | -0.251240 |
| N  | 1.332920  | 1.191290  | 1.387700  |
| N  | 0.312800  | 1.570320  | -1.227660 |
| N  | 1.605350  | -1.587210 | 0.879350  |
| N  | 0.597960  | -1.206120 | -1.741730 |
| C  | 1.852670  | 0.824680  | 2.611460  |
| C  | -0.153880 | 1.568590  | -2.524610 |
| C  | 1.081090  | 2.543530  | 1.479300  |
| C  | 0.193050  | 2.871590  | -0.789810 |
| C  | 2.093910  | -1.582740 | 2.169430  |
| C  | 0.097170  | -0.836380 | -2.971410 |
| C  | 1.644370  | -2.902680 | 0.470480  |
| C  | 0.767570  | -2.571640 | -1.803100 |
| C  | 1.932050  | 1.967990  | 3.482930  |
| C  | -0.569570 | 2.892890  | -2.908100 |
| C  | 1.449830  | 3.033190  | 2.782270  |
| C  | -0.358020 | 3.700430  | -1.830980 |
| C  | 2.439030  | -2.919820 | 2.577240  |
| C  | -0.048380 | -1.991210 | -3.819600 |
| C  | 2.157420  | -3.738780 | 1.524640  |
| C  | 0.364980  | -3.067990 | -3.094070 |
| H  | 2.303190  | 1.940550  | 4.499460  |
| H  | -0.977620 | 3.151540  | -3.876760 |
| H  | 1.344950  | 4.061450  | 3.104000  |
| H  | -0.554260 | 4.760450  | -1.732550 |
| H  | 2.839440  | -3.181390 | 3.548310  |
| H  | -0.426570 | -1.964480 | -4.833500 |
| H  | 2.280360  | -4.811870 | 1.452310  |
| H  | 0.398260  | -4.108960 | -3.389150 |
| C  | 2.221560  | -0.462090 | 2.977810  |
| C  | -0.244630 | 0.454680  | -3.346960 |
| C  | 1.255460  | -3.369290 | -0.777530 |
| C  | 0.548200  | 3.333040  | 0.469820  |
| H  | 2.620360  | -0.605720 | 3.976840  |
| H  | -0.631870 | 0.600860  | -4.350030 |
| H  | 1.341200  | -4.434600 | -0.965660 |
| H  | 0.400410  | 4.387340  | 0.680110  |
| O  | -1.512920 | -0.401030 | 0.658070  |
| S  | 3.429670  | 0.333850  | -1.083100 |
| C  | 3.796240  | 2.131440  | -0.956830 |
| H  | 3.733740  | 2.473600  | 0.080070  |
| H  | 4.812940  | 2.306190  | -1.322190 |
| H  | 3.101000  | 2.717920  | -1.564100 |
| C  | -1.790320 | -1.064140 | 1.638580  |
| H  | -3.190110 | -0.950830 | 3.207410  |
| H  | -0.986100 | -1.548770 | 2.226900  |
| C  | -3.190720 | -1.305340 | 2.165510  |
| H  | -3.310470 | -2.396490 | 2.236710  |
| C  | -4.302190 | -0.673610 | 1.362870  |
| C  | -4.940010 | -1.388170 | 0.340120  |
| C  | -4.706440 | 0.644130  | 1.616620  |
| C  | -5.957360 | -0.799760 | -0.414280 |
| H  | -4.640610 | -2.413460 | 0.134880  |
| C  | -5.723040 | 1.235800  | 0.864400  |
| H  | -4.224320 | 1.209490  | 2.410890  |
| C  | -6.351840 | 0.514830  | -0.153980 |
| H  | -6.443260 | -1.369490 | -1.201870 |
| H  | -6.025860 | 2.257770  | 1.076250  |
| H  | -7.145430 | 0.972990  | -0.737940 |

**Table S12:** Cartesian coordinates (xyz, in Å) of all DFT optimized stationary points reported in **Figures S9, S26, and S27** and **Table S4**.

| Int1-wat <sup>a</sup> |           |           |           | Int2-wat <sup>d</sup> |           |           |           |
|-----------------------|-----------|-----------|-----------|-----------------------|-----------|-----------|-----------|
| Fe                    | 0.894581  | 0.093474  | -0.334507 | Fe                    | 0.993823  | 0.008747  | 0.229941  |
| N                     | 1.364184  | 1.709752  | 0.758225  | N                     | 0.868403  | -2.007552 | 0.205176  |
| N                     | 2.172986  | -1.010108 | 0.745098  | N                     | 0.007323  | 0.023659  | 1.987724  |
| N                     | -0.329335 | 1.216760  | -1.474326 | N                     | 1.891829  | -0.006926 | -1.584184 |
| N                     | 0.452889  | -1.519593 | -1.459750 | N                     | 1.057575  | 2.029526  | 0.210090  |
| C                     | 0.959362  | 3.006341  | 0.531564  | C                     | 1.412692  | -2.846801 | -0.740853 |
| C                     | 2.517393  | -2.324391 | 0.527858  | C                     | -0.312277 | 1.135564  | 2.725274  |
| C                     | 2.148124  | 1.741611  | 1.888569  | C                     | 0.288846  | -2.822570 | 1.149036  |
| C                     | 2.839864  | -0.617814 | 1.884761  | C                     | -0.475945 | -1.052430 | 2.688178  |
| C                     | -0.500581 | 2.580405  | -1.402925 | C                     | 2.281612  | -1.120695 | -2.287135 |
| C                     | 1.030943  | -2.762863 | -1.380263 | C                     | 0.594427  | 2.860260  | 1.198500  |
| C                     | -1.155581 | 0.774037  | -2.478468 | C                     | 2.310615  | 1.074309  | -2.320262 |
| C                     | -0.484904 | -1.592880 | -2.460797 | C                     | 1.582979  | 2.842473  | -0.761542 |
| C                     | 1.504824  | 3.873552  | 1.544169  | C                     | 1.165409  | -4.224625 | -0.382962 |
| C                     | 3.431044  | -2.767115 | 1.549661  | C                     | -1.013112 | 0.748897  | 3.929814  |
| C                     | 2.229369  | 3.089200  | 2.391656  | C                     | 0.464548  | -4.209242 | 0.785615  |
| C                     | 3.618290  | -1.716167 | 2.398983  | C                     | -1.117598 | -0.608704 | 3.905292  |
| C                     | -1.460742 | 3.005999  | -2.389931 | C                     | 2.950455  | -0.730057 | -3.508121 |
| C                     | 0.437281  | -3.645958 | -2.354764 | C                     | 0.827482  | 4.241137  | 0.836722  |
| C                     | -1.874984 | 1.886239  | -3.047866 | C                     | 2.965636  | 0.631394  | -3.529798 |
| C                     | -0.510110 | -2.924942 | -3.015320 | C                     | 1.441043  | 4.229978  | -0.381127 |
| H                     | 1.336727  | 4.941792  | 1.591449  | H                     | 1.489099  | -5.079199 | -0.963929 |
| H                     | 3.852470  | -3.762527 | 1.605282  | H                     | -1.373431 | 1.440393  | 4.681252  |
| H                     | 2.784217  | 3.381539  | 3.273895  | H                     | 0.097022  | -5.048667 | 1.362580  |
| H                     | 4.233112  | -1.668557 | 3.288590  | H                     | -1.579455 | -1.264217 | 4.632985  |
| H                     | -1.773269 | 4.031561  | -2.538836 | H                     | 3.350230  | -1.421464 | -4.239388 |
| H                     | 0.716199  | -4.682692 | -2.492313 | H                     | 0.551711  | 5.093286  | 1.445257  |
| H                     | -2.593058 | 1.803276  | -3.853576 | H                     | 3.381259  | 1.290433  | -4.281721 |
| H                     | -1.167520 | -3.243553 | -3.814030 | H                     | 1.772627  | 5.070509  | -0.977747 |
| C                     | 0.110918  | 3.423841  | -0.485146 | C                     | 2.069718  | -2.440188 | -1.898136 |
| C                     | 2.012903  | -3.139989 | -0.476055 | C                     | -0.036795 | 2.451988  | 2.369509  |
| C                     | -1.256626 | -0.537297 | -2.925377 | C                     | 2.163359  | 2.405264  | -1.948164 |
| C                     | 2.812527  | 0.653907  | 2.440412  | C                     | -0.356814 | -2.383340 | 2.299424  |
| H                     | -0.122491 | 4.481936  | -0.541786 | H                     | 2.439543  | -3.218559 | -2.558774 |
| H                     | 2.376715  | -4.160946 | -0.523946 | H                     | -0.355388 | 3.228914  | 3.058058  |
| H                     | -1.955897 | -0.741173 | -3.729433 | H                     | 2.543596  | 3.161228  | -2.628367 |
| H                     | 3.393489  | 0.822622  | 3.341088  | H                     | -0.777824 | -3.137679 | 2.957270  |
| O                     | -0.531373 | -0.351138 | 0.806513  | O                     | -0.842580 | 0.146430  | -0.690500 |
| S                     | 2.577075  | 0.622803  | -1.881606 | S                     | 3.028528  | 0.024879  | 1.259386  |
| C                     | 4.129878  | 0.937742  | -0.969872 | C                     | 3.101629  | -1.334655 | 2.487305  |
| H                     | 4.016706  | 1.767007  | -0.267261 | H                     | 3.021293  | -2.313453 | 2.006909  |
| H                     | 4.883307  | 1.208740  | -1.716894 | H                     | 4.069112  | -1.270641 | 2.996105  |
| H                     | 4.466763  | 0.047451  | -0.433782 | H                     | 2.306794  | -1.239324 | 3.231901  |
| C                     | -1.396771 | 0.585748  | 1.445642  | C                     | -1.190135 | -0.739866 | -1.644701 |
| H                     | -0.844658 | 1.119110  | 2.235111  | H                     | -0.902815 | -1.799950 | -1.383910 |
| H                     | -1.744139 | 1.335763  | 0.727478  | H                     | -0.628540 | -0.629351 | -2.604139 |
| C                     | -2.524464 | -0.190341 | 2.041262  | C                     | -2.585048 | -0.961457 | -2.018700 |
| H                     | -2.256369 | -0.840719 | 2.870766  | H                     | -2.696647 | -1.640052 | -2.864632 |
| C                     | -3.857415 | -0.254226 | 1.566532  | C                     | -3.772249 | -0.497434 | -1.426765 |
| C                     | -4.799183 | -1.082751 | 2.248695  | C                     | -5.016499 | -0.974256 | -1.940802 |
| C                     | -4.333377 | 0.482169  | 0.440816  | C                     | -3.775809 | 0.408245  | -0.323306 |
| C                     | -6.121811 | -1.160841 | 1.840250  | C                     | -6.209367 | -0.571840 | -1.370786 |
| H                     | -4.459844 | -1.657268 | 3.106932  | H                     | -5.010951 | -1.662102 | -2.781199 |
| C                     | -5.659117 | 0.393538  | 0.039065  | C                     | -4.981700 | 0.798409  | 0.238889  |
| H                     | -3.650724 | 1.114111  | -0.117929 | H                     | -2.829132 | 0.780599  | 0.042693  |
| C                     | -6.564555 | -0.422924 | 0.732193  | C                     | -6.189932 | 0.313454  | -0.279705 |
| H                     | -6.816429 | -1.798743 | 2.380221  | H                     | -7.154773 | -0.934975 | -1.760078 |
| H                     | -5.996161 | 0.962224  | -0.823627 | H                     | -4.991422 | 1.486207  | 1.078193  |
| H                     | -7.600324 | -0.485827 | 0.411272  | H                     | -7.128708 | 0.630181  | 0.165764  |
| O                     | -0.140915 | -2.497023 | 2.598456  | O                     | -1.639015 | 2.689854  | -1.478199 |
| H                     | 0.750592  | -2.321060 | 2.935359  | H                     | -1.277411 | 1.820375  | -1.187249 |
| H                     | -0.263462 | -1.804584 | 1.912529  | H                     | -1.057791 | 3.331520  | -1.042676 |

Int2-wat<sup>a</sup>

|    |           |           |           |
|----|-----------|-----------|-----------|
| S  | -2.609997 | 0.001226  | -2.196524 |
| C  | -2.902608 | -1.754142 | -2.658856 |
| H  | -3.627397 | -1.797008 | -3.478566 |
| H  | -3.303851 | -2.322095 | -1.813571 |
| N  | 0.208990  | -1.420080 | -1.139627 |
| N  | 0.175458  | 1.446914  | -1.256456 |
| N  | -1.986881 | 1.498260  | 0.592770  |
| C  | 1.061533  | -3.476702 | -1.751320 |
| N  | -1.937809 | -1.367627 | 0.737071  |
| C  | 1.779177  | -2.528059 | -2.417977 |
| C  | 0.083930  | -2.776739 | -0.953806 |
| C  | -0.834812 | -3.393841 | -0.111026 |
| C  | 1.241421  | -1.247018 | -2.029198 |
| C  | 1.714704  | -0.022382 | -2.490563 |
| C  | 1.212622  | 1.222501  | -2.131157 |
| C  | 1.708917  | 2.478393  | -2.641371 |
| C  | 0.955964  | 3.461129  | -2.071678 |
| C  | -0.001055 | 2.808072  | -1.210610 |
| C  | -0.963290 | 3.471093  | -0.454655 |
| C  | -1.885207 | 2.851064  | 0.384518  |
| C  | -2.867386 | 3.550319  | 1.178037  |
| C  | -3.561297 | 2.603758  | 1.870067  |
| C  | -3.007628 | 1.324043  | 1.497901  |
| C  | -3.457781 | 0.104182  | 1.988329  |
| C  | -2.959545 | -1.143313 | 1.627126  |
| C  | -3.453939 | -2.398543 | 2.139310  |
| C  | -1.775851 | -2.730709 | 0.672307  |
| C  | -2.720430 | -3.383230 | 1.546940  |
| H  | -0.817946 | -4.478090 | -0.061090 |
| H  | 2.538416  | -0.041770 | -3.197282 |
| H  | -0.998865 | 4.553670  | -0.525896 |
| H  | -4.273394 | 0.126311  | 2.704224  |
| Fe | -0.918289 | 0.038722  | -0.303679 |
| C  | 1.001187  | -0.912753 | 2.071941  |
| C  | 2.426121  | -1.252610 | 2.181228  |
| C  | 3.555404  | -0.615137 | 1.641962  |
| C  | 4.840540  | -1.196653 | 1.870359  |
| C  | 3.459951  | 0.582015  | 0.868991  |
| C  | 5.975952  | -0.614300 | 1.340483  |
| C  | 4.611295  | 1.156225  | 0.351012  |
| C  | 5.859391  | 0.562274  | 0.579976  |
| H  | 0.701560  | -0.874880 | 3.158420  |
| H  | 0.536234  | -1.893660 | 1.793257  |
| H  | 2.611047  | -2.139600 | 2.788209  |
| H  | 4.910706  | -2.105158 | 2.461506  |
| H  | 2.486231  | 1.030996  | 0.728985  |
| H  | 6.951699  | -1.057385 | 1.510344  |
| H  | 4.544880  | 2.068341  | -0.233232 |
| H  | 6.753925  | 1.020264  | 0.167422  |
| O  | 0.561299  | 0.130263  | 1.350778  |
| O  | 1.003044  | 2.672116  | 2.248462  |
| H  | 0.814482  | 1.738986  | 1.981695  |
| H  | 0.575428  | 3.181597  | 1.543532  |
| H  | -1.977567 | -2.236497 | -2.989842 |
| H  | -4.258879 | -2.496391 | 2.856695  |
| H  | -2.799534 | -4.454978 | 1.678505  |
| H  | 1.171766  | -4.553267 | -1.785352 |
| H  | 2.599002  | -2.666901 | -3.111371 |
| H  | 2.523246  | 2.576860  | -3.348044 |
| H  | 1.026555  | 4.532304  | -2.212164 |
| H  | -2.993230 | 4.625473  | 1.194032  |
| H  | -4.375760 | 2.741552  | 2.569782  |

Int1-EF<sup>a</sup>

|    |           |           |           |
|----|-----------|-----------|-----------|
| Fe | 37.815127 | 32.293075 | 49.178314 |
| N  | 39.030701 | 32.679041 | 50.729149 |
| N  | 39.403914 | 32.233763 | 47.946541 |
| N  | 36.226527 | 32.286398 | 50.416643 |
| N  | 36.596965 | 31.845482 | 47.629697 |
| C  | 38.672868 | 32.771737 | 52.054931 |
| C  | 39.397009 | 31.934817 | 46.605459 |
| C  | 40.382216 | 32.929517 | 50.674573 |
| C  | 40.702862 | 32.555455 | 48.264270 |
| C  | 36.250716 | 32.424840 | 51.786150 |
| C  | 36.975510 | 31.588342 | 46.334733 |
| C  | 34.906420 | 32.130529 | 50.067176 |
| C  | 35.226777 | 31.756212 | 47.656359 |
| C  | 39.830766 | 33.081804 | 52.854572 |
| C  | 40.729616 | 32.056579 | 46.067485 |
| C  | 40.886620 | 33.189984 | 51.999250 |
| C  | 41.536291 | 32.450594 | 47.092245 |
| C  | 34.909869 | 32.357508 | 52.309902 |
| C  | 35.811043 | 31.326071 | 45.523464 |
| C  | 34.076909 | 32.184983 | 51.245080 |
| C  | 34.727420 | 31.438609 | 46.340126 |
| H  | 39.816909 | 33.206955 | 53.929686 |
| H  | 40.991815 | 31.872088 | 45.033592 |
| H  | 41.920223 | 33.416858 | 52.227348 |
| H  | 42.599824 | 32.651668 | 47.076695 |
| H  | 34.656964 | 32.440476 | 53.359160 |
| H  | 35.840150 | 31.096069 | 44.466100 |
| H  | 32.998420 | 32.091848 | 51.239160 |
| H  | 33.680178 | 31.315630 | 46.095370 |
| C  | 37.385426 | 32.635916 | 52.557188 |
| C  | 38.276395 | 31.610769 | 45.852117 |
| C  | 34.429156 | 31.906403 | 48.782006 |
| C  | 41.164610 | 32.898388 | 49.527378 |
| H  | 37.252703 | 32.733318 | 53.629667 |
| H  | 38.425216 | 31.395149 | 44.799138 |
| H  | 33.356503 | 31.802309 | 48.656176 |
| H  | 42.221050 | 33.121979 | 49.633380 |
| O  | 37.607067 | 34.093340 | 48.820253 |
| S  | 37.988854 | 29.989629 | 49.590443 |
| C  | 39.750240 | 29.565660 | 49.839991 |
| H  | 40.169836 | 30.098061 | 50.697141 |
| H  | 39.792700 | 28.489468 | 50.037167 |
| H  | 40.343459 | 29.786047 | 48.949283 |
| C  | 37.368794 | 35.121605 | 49.773208 |
| H  | 38.220349 | 35.194068 | 50.465476 |
| H  | 36.478713 | 34.889912 | 50.371895 |
| C  | 37.215626 | 36.400269 | 49.015395 |
| H  | 38.135584 | 36.877663 | 48.683469 |
| C  | 35.994034 | 36.980262 | 48.590831 |
| C  | 36.015879 | 38.197637 | 47.846403 |
| C  | 34.715976 | 36.416991 | 48.881645 |
| C  | 34.843556 | 38.812097 | 47.432438 |
| H  | 36.977814 | 38.645075 | 47.608327 |
| C  | 33.549100 | 37.038979 | 48.458906 |
| H  | 34.653026 | 35.483204 | 49.431031 |
| C  | 33.599266 | 38.239345 | 47.735393 |
| H  | 34.890854 | 39.740299 | 46.869138 |
| H  | 32.587709 | 36.587752 | 48.690143 |
| H  | 32.681511 | 38.720030 | 47.409086 |

Int2-EF<sup>d</sup>

|    |           |           |           |
|----|-----------|-----------|-----------|
| Fe | 37.838692 | 32.153782 | 49.152729 |
| N  | 39.414766 | 32.349049 | 47.892329 |
| N  | 36.600805 | 31.943414 | 47.571878 |
| N  | 39.068951 | 32.453198 | 50.734455 |
| N  | 36.255685 | 32.059857 | 50.409326 |
| C  | 40.733424 | 32.514858 | 48.243092 |
| C  | 35.241883 | 31.748463 | 47.612056 |
| C  | 39.381496 | 32.305498 | 46.520085 |
| C  | 36.950682 | 31.958895 | 46.243094 |
| C  | 40.437284 | 32.588806 | 50.696216 |
| C  | 34.943888 | 31.846878 | 50.061937 |
| C  | 38.713127 | 32.492472 | 52.060364 |
| C  | 36.280494 | 32.166365 | 51.778292 |
| C  | 41.554286 | 32.578875 | 47.057292 |
| C  | 34.720525 | 31.629376 | 46.271442 |
| C  | 40.716017 | 32.451798 | 45.989473 |
| C  | 35.779173 | 31.762515 | 45.422889 |
| C  | 40.956039 | 32.720612 | 52.036248 |
| C  | 34.117972 | 31.816748 | 51.245881 |
| C  | 39.887311 | 32.663763 | 52.881224 |
| C  | 34.945976 | 32.017402 | 52.309403 |
| H  | 42.629585 | 32.705541 | 47.059073 |
| H  | 33.677592 | 31.468930 | 46.028778 |
| H  | 40.962934 | 32.451624 | 44.935199 |
| H  | 35.783922 | 31.731825 | 44.340563 |
| H  | 42.003759 | 32.840830 | 52.281548 |
| H  | 33.046297 | 31.662557 | 51.244793 |
| H  | 39.878657 | 32.726844 | 53.962104 |
| H  | 34.694292 | 32.060227 | 53.361618 |
| C  | 41.216132 | 32.619343 | 49.544385 |
| C  | 34.465647 | 31.695279 | 48.765429 |
| C  | 37.417227 | 32.370459 | 52.552789 |
| C  | 38.237958 | 32.132888 | 45.746289 |
| H  | 42.287426 | 32.741388 | 49.670414 |
| H  | 33.399303 | 31.533938 | 48.642010 |
| H  | 37.285419 | 32.423547 | 53.628963 |
| H  | 38.362466 | 32.118454 | 44.667971 |
| O  | 37.519074 | 34.307310 | 48.999064 |
| S  | 38.223581 | 29.635837 | 49.374751 |
| C  | 38.433766 | 28.962428 | 47.675252 |
| H  | 39.309482 | 29.398730 | 47.183554 |
| H  | 38.572087 | 27.877238 | 47.725846 |
| H  | 37.555065 | 29.169828 | 47.056155 |
| C  | 38.501945 | 35.185493 | 49.198000 |
| H  | 39.430167 | 34.989616 | 48.581201 |
| H  | 38.974656 | 35.137736 | 50.218430 |
| C  | 38.341514 | 36.623230 | 48.974721 |
| H  | 39.237710 | 37.202222 | 49.198253 |
| C  | 37.222855 | 37.332937 | 48.501926 |
| C  | 37.315307 | 38.748158 | 48.344127 |
| C  | 36.000012 | 36.672564 | 48.178587 |
| C  | 36.230612 | 39.470912 | 47.883273 |
| H  | 38.247468 | 39.248255 | 48.590912 |
| C  | 34.921799 | 37.413316 | 47.716540 |
| H  | 35.956700 | 35.597546 | 48.305713 |
| C  | 35.034854 | 38.802133 | 47.569748 |
| H  | 36.298688 | 40.547155 | 47.762859 |
| H  | 33.988610 | 36.917972 | 47.467919 |
| H  | 34.184810 | 39.373294 | 47.207340 |

Int2-EF<sup>d</sup>

|    |           |           |           |
|----|-----------|-----------|-----------|
| Fe | 37.825787 | 32.230751 | 49.223926 |
| N  | 36.544800 | 32.077060 | 47.670084 |
| N  | 36.261835 | 32.050872 | 50.489698 |
| N  | 39.390755 | 32.476180 | 47.959374 |
| N  | 39.107845 | 32.448991 | 50.778821 |
| C  | 36.883174 | 32.106954 | 46.342420 |
| C  | 36.329364 | 32.058466 | 51.858638 |
| C  | 35.181490 | 31.933752 | 47.716149 |
| C  | 34.934743 | 31.912503 | 50.171292 |
| C  | 39.328004 | 32.431738 | 46.589198 |
| C  | 38.774119 | 32.380964 | 52.108338 |
| C  | 40.717462 | 32.642616 | 48.277671 |
| C  | 40.471057 | 32.618295 | 50.733672 |
| C  | 35.697890 | 31.969404 | 45.523313 |
| C  | 35.004903 | 31.911511 | 52.423302 |
| C  | 34.641386 | 31.864653 | 46.376111 |
| C  | 34.139127 | 31.823458 | 51.375889 |
| C  | 40.650979 | 32.585990 | 46.026149 |
| C  | 39.958551 | 32.522572 | 52.925732 |
| C  | 41.512448 | 32.718298 | 47.073136 |
| C  | 41.010719 | 32.671143 | 52.073336 |
| H  | 35.695165 | 31.960058 | 44.440382 |
| H  | 34.786842 | 31.885447 | 53.483800 |
| H  | 33.590720 | 31.750267 | 46.139778 |
| H  | 33.062493 | 31.708704 | 51.396839 |
| H  | 40.872470 | 32.588833 | 44.966051 |
| H  | 39.964706 | 32.507237 | 54.008577 |
| H  | 42.586976 | 32.850863 | 47.051095 |
| H  | 42.059276 | 32.801175 | 52.310761 |
| C  | 38.170038 | 32.264964 | 45.835616 |
| C  | 37.489638 | 32.204997 | 52.614041 |
| C  | 41.228471 | 32.714785 | 49.570399 |
| C  | 34.421103 | 31.862157 | 48.879205 |
| H  | 38.280011 | 32.259609 | 44.755125 |
| H  | 37.382765 | 32.181326 | 53.694563 |
| H  | 42.300969 | 32.844773 | 49.679302 |
| H  | 33.346655 | 31.748266 | 48.770215 |
| O  | 37.464882 | 34.184959 | 49.199051 |
| S  | 38.244468 | 29.969411 | 49.243662 |
| C  | 36.669302 | 29.049770 | 49.052698 |
| H  | 36.186749 | 29.279252 | 48.098498 |
| H  | 36.898240 | 27.979353 | 49.081854 |
| H  | 35.972386 | 29.281462 | 49.862923 |
| C  | 38.461731 | 35.075583 | 49.335439 |
| H  | 39.305275 | 34.932975 | 48.603864 |
| H  | 39.041663 | 34.973876 | 50.291071 |
| C  | 38.211777 | 36.511527 | 49.236653 |
| H  | 39.105630 | 37.117313 | 49.385025 |
| C  | 37.016280 | 37.200923 | 48.971194 |
| C  | 37.045440 | 38.627427 | 48.915044 |
| C  | 35.780572 | 36.519223 | 48.754561 |
| C  | 35.890107 | 39.339690 | 48.653701 |
| H  | 37.986912 | 39.143202 | 49.080422 |
| C  | 34.631492 | 37.249883 | 48.492357 |
| H  | 35.781186 | 35.437212 | 48.800762 |
| C  | 34.684207 | 38.649532 | 48.442368 |
| H  | 35.910504 | 40.423655 | 48.610846 |
| H  | 33.688842 | 36.738546 | 48.325698 |
| H  | 33.777992 | 39.212218 | 48.236759 |



**Int1<sup>a</sup>** (gas phase)

|    |           |           |           |
|----|-----------|-----------|-----------|
| Fe | 37.828897 | 32.282386 | 49.162436 |
| N  | 39.025379 | 32.688085 | 50.726940 |
| N  | 39.435531 | 32.197778 | 47.955463 |
| N  | 36.220645 | 32.311320 | 50.379506 |
| N  | 36.627824 | 31.836880 | 47.600426 |
| C  | 38.649747 | 32.793509 | 52.045400 |
| C  | 39.443253 | 31.884988 | 46.620022 |
| C  | 40.377297 | 32.929953 | 50.687774 |
| C  | 40.728613 | 32.522369 | 48.285519 |
| C  | 36.228124 | 32.457740 | 51.746351 |
| C  | 37.021858 | 31.563487 | 46.316837 |
| C  | 34.906681 | 32.167091 | 50.011604 |
| C  | 35.258910 | 31.772508 | 47.607334 |
| C  | 39.798146 | 33.105156 | 52.858284 |
| C  | 40.783290 | 31.995302 | 46.096607 |
| C  | 40.865672 | 33.200063 | 52.016842 |
| C  | 41.577554 | 32.400192 | 47.125502 |
| C  | 34.879249 | 32.407680 | 52.252216 |
| C  | 35.865697 | 31.313852 | 45.487798 |
| C  | 34.060266 | 32.237231 | 51.177214 |
| C  | 34.772982 | 31.452527 | 46.285282 |
| H  | 39.771681 | 33.239920 | 53.932154 |
| H  | 41.058444 | 31.798077 | 45.068306 |
| H  | 41.897143 | 33.423477 | 52.258328 |
| H  | 42.641732 | 32.599321 | 47.119460 |
| H  | 34.611376 | 32.499489 | 53.297109 |
| H  | 35.906923 | 31.074896 | 44.432754 |
| H  | 32.981029 | 32.153544 | 51.157775 |
| H  | 33.727651 | 31.346398 | 46.024542 |
| C  | 37.354514 | 32.668029 | 52.529720 |
| C  | 38.329951 | 31.562610 | 45.855562 |
| C  | 34.447763 | 31.941976 | 48.719830 |
| C  | 41.173487 | 32.880573 | 49.550229 |
| H  | 37.207814 | 32.773872 | 53.599938 |
| H  | 38.492024 | 31.334036 | 44.806987 |
| H  | 33.375535 | 31.851713 | 48.577875 |
| H  | 42.229622 | 33.102000 | 49.667381 |
| O  | 37.634818 | 34.061470 | 48.771262 |
| S  | 37.958899 | 30.019043 | 49.611166 |
| C  | 39.711643 | 29.566574 | 49.853656 |
| H  | 40.150037 | 30.109699 | 50.695061 |
| H  | 39.733287 | 28.494577 | 50.075579 |
| H  | 40.301549 | 29.754616 | 48.953023 |
| C  | 37.440807 | 35.127444 | 49.685029 |
| H  | 38.333495 | 35.238094 | 50.320183 |
| H  | 36.594325 | 34.914322 | 50.350883 |
| C  | 37.223408 | 36.374230 | 48.889457 |
| H  | 38.110363 | 36.810940 | 48.434469 |
| C  | 35.974567 | 36.964389 | 48.574957 |
| C  | 35.936884 | 38.151585 | 47.784870 |
| C  | 34.724872 | 36.443470 | 49.022811 |
| C  | 34.739579 | 38.777922 | 47.476075 |
| H  | 36.875871 | 38.566198 | 47.425752 |
| C  | 33.532057 | 37.077367 | 48.705226 |
| H  | 34.704333 | 35.529854 | 49.607925 |
| C  | 33.525062 | 38.248198 | 47.934731 |
| H  | 34.743923 | 39.682928 | 46.873825 |
| H  | 32.592937 | 36.657036 | 49.056588 |
| H  | 32.586616 | 38.738571 | 47.691505 |

**Int2<sup>a</sup>** (gas phase)

|    |           |           |           |
|----|-----------|-----------|-----------|
| Fe | 37.833797 | 32.252468 | 49.188805 |
| N  | 36.572247 | 32.065792 | 47.621178 |
| N  | 36.252861 | 32.114853 | 50.439915 |
| N  | 39.414494 | 32.434662 | 47.937126 |
| N  | 39.094940 | 32.484859 | 50.755466 |
| C  | 36.926453 | 32.057388 | 46.298313 |
| C  | 36.302090 | 32.153534 | 51.808010 |
| C  | 35.207069 | 31.953527 | 47.654293 |
| C  | 34.929260 | 31.996174 | 50.106125 |
| C  | 39.370422 | 32.350117 | 46.569080 |
| C  | 38.745644 | 32.447235 | 52.081070 |
| C  | 40.739964 | 32.590080 | 48.269897 |
| C  | 40.462032 | 32.633274 | 50.722534 |
| C  | 35.748676 | 31.923779 | 45.468334 |
| C  | 34.967983 | 32.043823 | 52.357544 |
| C  | 34.681259 | 31.862114 | 46.309814 |
| C  | 34.115658 | 31.948994 | 51.301235 |
| C  | 40.702850 | 32.468464 | 46.021725 |
| C  | 39.922333 | 32.589359 | 52.908234 |
| C  | 41.551483 | 32.619854 | 47.075684 |
| C  | 40.985870 | 32.707314 | 52.066280 |
| H  | 35.758053 | 31.887415 | 44.386032 |
| H  | 34.734871 | 32.044849 | 53.415108 |
| H  | 33.631416 | 31.763279 | 46.062889 |
| H  | 33.036808 | 31.854612 | 51.310299 |
| H  | 40.939869 | 32.435322 | 44.965527 |
| H  | 39.916943 | 32.593552 | 53.991184 |
| H  | 42.628380 | 32.733105 | 47.064152 |
| H  | 42.033371 | 32.824764 | 52.314526 |
| C  | 38.221214 | 32.180119 | 45.804676 |
| C  | 37.453907 | 32.298828 | 52.574368 |
| C  | 41.233891 | 32.689587 | 49.566635 |
| C  | 34.432220 | 31.925810 | 48.809013 |
| H  | 38.345661 | 32.142113 | 44.726341 |
| H  | 37.333740 | 32.298565 | 53.653851 |
| H  | 42.307224 | 32.803421 | 49.686256 |
| H  | 33.357010 | 31.829540 | 48.688877 |
| O  | 37.496223 | 34.176361 | 49.115662 |
| S  | 38.258678 | 30.009844 | 49.276875 |
| C  | 36.690250 | 29.090193 | 49.115410 |
| H  | 36.203686 | 29.315037 | 48.161621 |
| H  | 36.914093 | 28.020077 | 49.159927 |
| H  | 36.003506 | 29.346584 | 49.927605 |
| C  | 38.505878 | 35.058956 | 49.218273 |
| H  | 39.312454 | 34.894428 | 48.452942 |
| H  | 39.112400 | 34.925133 | 50.154976 |
| C  | 38.234249 | 36.498798 | 49.159466 |
| H  | 39.127003 | 37.118023 | 49.253590 |
| C  | 37.006279 | 37.171417 | 49.001282 |
| C  | 36.994091 | 38.598843 | 48.973606 |
| C  | 35.767361 | 36.474052 | 48.866863 |
| C  | 35.808403 | 39.292995 | 48.820061 |
| H  | 37.934380 | 39.134991 | 49.075451 |
| C  | 34.586742 | 37.188778 | 48.713482 |
| H  | 35.788353 | 35.391010 | 48.889076 |
| C  | 34.599815 | 38.588257 | 48.689404 |
| H  | 35.809189 | 40.378906 | 48.800236 |
| H  | 33.646244 | 36.655197 | 48.611462 |
| H  | 33.669117 | 39.136200 | 48.568783 |

**Int1-EF<sup>a</sup>** (gas phase)

|    |           |           |           |
|----|-----------|-----------|-----------|
| Fe | 37.828903 | 32.282375 | 49.163044 |
| N  | 39.025757 | 32.689228 | 50.726971 |
| N  | 39.435268 | 32.196735 | 47.955788 |
| N  | 36.220924 | 32.312355 | 50.380444 |
| N  | 36.627464 | 31.835718 | 47.601646 |
| C  | 38.650421 | 32.795681 | 52.045433 |
| C  | 39.442680 | 31.882896 | 46.620590 |
| C  | 40.377678 | 32.930996 | 50.687317 |
| C  | 40.728439 | 32.521530 | 48.285301 |
| C  | 36.228710 | 32.459839 | 51.747173 |
| C  | 37.021206 | 31.561287 | 46.318188 |
| C  | 34.906868 | 32.167953 | 50.012936 |
| C  | 35.258549 | 31.771458 | 47.608902 |
| C  | 39.799019 | 33.107891 | 52.857822 |
| C  | 40.782608 | 31.992741 | 46.096790 |
| C  | 40.866360 | 33.202103 | 52.016071 |
| C  | 41.577118 | 32.398407 | 47.125195 |
| C  | 34.879940 | 32.410290 | 52.253368 |
| C  | 35.864845 | 31.311085 | 45.489597 |
| C  | 34.060711 | 32.239075 | 51.178673 |
| C  | 34.772312 | 31.450472 | 46.287209 |
| H  | 39.772800 | 33.243488 | 53.931595 |
| H  | 41.057526 | 31.794701 | 45.068584 |
| H  | 41.897896 | 33.425659 | 52.257153 |
| H  | 42.641300 | 32.597488 | 47.118755 |
| H  | 34.612301 | 32.502937 | 53.298244 |
| H  | 35.905823 | 31.071299 | 44.434731 |
| H  | 32.981461 | 32.155472 | 51.159531 |
| H  | 33.726917 | 31.344225 | 46.026775 |
| C  | 37.355289 | 32.670650 | 52.530132 |
| C  | 38.329197 | 31.559971 | 45.856628 |
| C  | 34.447655 | 31.941868 | 48.721436 |
| C  | 41.173611 | 32.880699 | 49.549633 |
| H  | 37.208828 | 32.777332 | 53.600304 |
| H  | 38.491028 | 31.330566 | 44.808197 |
| H  | 33.375389 | 31.851595 | 48.579781 |
| H  | 42.229782 | 33.102173 | 49.666374 |
| O  | 37.634850 | 34.061169 | 48.770531 |
| S  | 37.958889 | 30.019348 | 49.613503 |
| C  | 39.711670 | 29.566996 | 49.855961 |
| H  | 40.150276 | 30.110767 | 50.696838 |
| H  | 39.733322 | 28.495173 | 50.078720 |
| H  | 40.301384 | 29.754307 | 48.955048 |
| C  | 37.441051 | 35.127857 | 49.683510 |
| H  | 38.333923 | 35.239040 | 50.318314 |
| H  | 36.594776 | 34.915237 | 50.349777 |
| C  | 37.223392 | 36.373978 | 48.886971 |
| H  | 38.110165 | 36.810062 | 48.431026 |
| C  | 35.974495 | 36.964119 | 48.572678 |
| C  | 35.936615 | 38.150551 | 47.781448 |
| C  | 34.724949 | 36.443954 | 49.021816 |
| C  | 34.739277 | 38.776878 | 47.472775 |
| H  | 36.875481 | 38.564575 | 47.421341 |
| C  | 33.532093 | 37.077831 | 48.704342 |
| H  | 34.704536 | 35.530926 | 49.607853 |
| C  | 33.524910 | 38.247906 | 47.932697 |
| H  | 34.743469 | 39.681290 | 46.869629 |
| H  | 32.593086 | 36.658081 | 49.056698 |
| H  | 32.586433 | 38.738270 | 47.689564 |

**Int2-EF<sup>d</sup>** (gas phase)

|    |           |           |           |
|----|-----------|-----------|-----------|
| Fe | 37.833820 | 32.252491 | 49.188766 |
| N  | 36.572292 | 32.065933 | 47.621098 |
| N  | 36.252857 | 32.114780 | 50.439835 |
| N  | 39.414543 | 32.434734 | 47.937126 |
| N  | 39.094948 | 32.484692 | 50.755459 |
| C  | 36.926521 | 32.057659 | 46.298241 |
| C  | 36.302063 | 32.153381 | 51.807930 |
| C  | 35.207111 | 31.953686 | 47.654182 |
| C  | 34.929260 | 31.996153 | 50.106014 |
| C  | 39.370491 | 32.350334 | 46.569069 |
| C  | 38.745621 | 32.446999 | 52.081055 |
| C  | 40.740017 | 32.590084 | 48.269928 |
| C  | 40.462044 | 32.633072 | 50.722565 |
| C  | 35.748756 | 31.924143 | 45.468227 |
| C  | 34.967945 | 32.043671 | 52.357433 |
| C  | 34.681320 | 31.862406 | 46.309689 |
| C  | 34.115635 | 31.948923 | 51.301105 |
| C  | 40.702930 | 32.468704 | 46.021744 |
| C  | 39.922298 | 32.589043 | 52.908249 |
| C  | 41.551552 | 32.619961 | 47.075729 |
| C  | 40.985859 | 32.707008 | 52.066322 |
| H  | 35.758148 | 31.887894 | 44.385921 |
| H  | 34.734814 | 32.044651 | 53.414993 |
| H  | 33.631481 | 31.763613 | 46.062737 |
| H  | 33.036785 | 31.854576 | 51.310143 |
| H  | 40.939960 | 32.435677 | 44.965542 |
| H  | 39.916885 | 32.593178 | 53.991199 |
| H  | 42.628452 | 32.733189 | 47.064220 |
| H  | 42.033356 | 32.824429 | 52.314594 |
| C  | 38.221287 | 32.180435 | 45.804630 |
| C  | 37.453873 | 32.298595 | 52.574318 |
| C  | 41.233925 | 32.689457 | 49.566681 |
| C  | 34.432243 | 31.925884 | 48.808887 |
| H  | 38.345749 | 32.142544 | 44.726295 |
| H  | 37.333683 | 32.298275 | 53.653797 |
| H  | 42.307259 | 32.803261 | 49.686329 |
| H  | 33.357033 | 31.829651 | 48.688721 |
| O  | 37.496265 | 34.176350 | 49.115791 |
| S  | 38.258690 | 30.009798 | 49.276600 |
| C  | 36.690243 | 29.090168 | 49.115208 |
| H  | 36.203579 | 29.315125 | 48.161499 |
| H  | 36.914078 | 28.020044 | 49.159580 |
| H  | 36.003590 | 29.346485 | 49.927502 |
| C  | 38.505909 | 35.058971 | 49.218445 |
| H  | 39.312366 | 34.894627 | 48.452934 |
| H  | 39.112553 | 34.925022 | 50.155025 |
| C  | 38.234200 | 36.498814 | 49.159729 |
| H  | 39.126919 | 37.118073 | 49.253948 |
| C  | 37.006222 | 37.171391 | 49.001476 |
| C  | 36.993992 | 38.598820 | 48.973858 |
| C  | 35.767326 | 36.473995 | 48.866970 |
| C  | 35.808292 | 39.292942 | 48.820278 |
| H  | 37.934258 | 39.134991 | 49.075775 |
| C  | 34.586700 | 37.188690 | 48.713547 |
| H  | 35.788349 | 35.390949 | 48.889141 |
| C  | 34.599731 | 38.588173 | 48.689529 |
| H  | 35.809048 | 40.378857 | 48.800503 |
| H  | 33.646221 | 36.655087 | 48.611462 |
| H  | 33.669025 | 39.136093 | 48.568882 |

**Int2-EF<sup>a</sup>** (gas phase)

|    |           |           |           |
|----|-----------|-----------|-----------|
| Fe | 38.049469 | 32.396069 | 48.953751 |
| N  | 39.704124 | 32.417152 | 47.784206 |
| N  | 36.902794 | 32.050266 | 47.325008 |
| N  | 39.229431 | 32.488159 | 50.600986 |
| N  | 36.428101 | 32.124866 | 50.134754 |
| C  | 41.005718 | 32.568298 | 48.196655 |
| C  | 35.538925 | 31.894007 | 47.293575 |
| C  | 39.740273 | 32.342392 | 46.414082 |
| C  | 37.322369 | 32.038052 | 46.016994 |
| C  | 40.596119 | 32.628334 | 50.631535 |
| C  | 35.128582 | 31.957254 | 49.725910 |
| C  | 38.812977 | 32.486984 | 51.909206 |
| C  | 36.395592 | 32.186275 | 51.506760 |
| C  | 41.885742 | 32.593552 | 47.053654 |
| C  | 35.087051 | 31.772734 | 45.928986 |
| C  | 41.101265 | 32.453239 | 45.948818 |
| C  | 36.192627 | 31.861454 | 45.137772 |
| C  | 41.052120 | 32.719608 | 51.997005 |
| C  | 34.252811 | 31.903551 | 50.871731 |
| C  | 39.946869 | 32.632141 | 52.788773 |
| C  | 35.038250 | 32.045559 | 51.975315 |
| H  | 42.961971 | 32.699409 | 47.107117 |
| H  | 34.054729 | 31.637152 | 45.631638 |
| H  | 41.401226 | 32.421467 | 44.908970 |
| H  | 36.254318 | 31.814142 | 44.057865 |
| H  | 42.087231 | 32.830425 | 52.294678 |
| H  | 33.179031 | 31.773663 | 50.820782 |
| H  | 39.888626 | 32.657368 | 53.869610 |
| H  | 34.742340 | 32.055908 | 53.016727 |
| C  | 41.427299 | 32.669437 | 49.517948 |
| C  | 34.706074 | 31.851402 | 48.405708 |
| C  | 37.497051 | 32.355167 | 52.336582 |
| C  | 38.636993 | 32.171993 | 45.586460 |
| H  | 42.492714 | 32.780903 | 49.694405 |
| H  | 33.642673 | 31.721128 | 48.229607 |
| H  | 37.315891 | 32.377010 | 53.406780 |
| H  | 38.817074 | 32.134628 | 44.516495 |
| O  | 37.805618 | 34.333149 | 48.862415 |
| S  | 38.555542 | 29.627615 | 49.176769 |
| C  | 37.011414 | 28.768589 | 48.744736 |
| H  | 36.710865 | 29.036337 | 47.725517 |
| H  | 37.124573 | 27.683764 | 48.820091 |
| H  | 36.212387 | 29.097200 | 49.419601 |
| C  | 38.762135 | 35.295818 | 49.029224 |
| H  | 39.622612 | 35.151901 | 48.331684 |
| H  | 39.249626 | 35.227146 | 50.031937 |
| C  | 38.360462 | 36.722290 | 48.875641 |
| H  | 39.187836 | 37.419468 | 49.016899 |
| C  | 37.105469 | 37.290199 | 48.583382 |
| C  | 36.992592 | 38.713512 | 48.495213 |
| C  | 35.922215 | 36.516003 | 48.368183 |
| C  | 35.782101 | 39.321320 | 48.213371 |
| H  | 37.881859 | 39.318783 | 48.655319 |
| C  | 34.717220 | 37.143291 | 48.087036 |
| H  | 36.002140 | 35.438305 | 48.431572 |
| C  | 34.633766 | 38.540131 | 48.007034 |
| H  | 35.720337 | 40.404636 | 48.151672 |
| H  | 33.826908 | 36.540756 | 47.926208 |
| H  | 33.683731 | 39.018841 | 47.785442 |

**Table S13:** Cartesian coordinates (xyz, in Å) of the QM atoms of all QM/MM optimized stationary points reported in **Figure S14** and **Table S5**.

| LA1-1 <sup>d</sup> |           |           |           | LA1-1 <sup>a</sup> |           |           |           |
|--------------------|-----------|-----------|-----------|--------------------|-----------|-----------|-----------|
| S                  | 39.799000 | 27.538000 | 45.405998 | S                  | 39.804001 | 27.525000 | 45.408001 |
| C                  | 40.945000 | 26.624001 | 46.512001 | C                  | 40.951000 | 26.608000 | 46.511002 |
| H                  | 41.685001 | 26.086000 | 45.910000 | H                  | 41.688999 | 26.069000 | 45.909000 |
| H                  | 41.467999 | 27.320999 | 47.167000 | H                  | 41.474998 | 27.302999 | 47.166000 |
| N                  | 37.698002 | 28.681000 | 47.366001 | N                  | 37.705002 | 28.670000 | 47.365002 |
| N                  | 38.041000 | 29.816999 | 44.755001 | N                  | 38.050999 | 29.799999 | 44.752998 |
| N                  | 40.674999 | 30.653999 | 45.481998 | N                  | 40.688999 | 30.629999 | 45.480000 |
| C                  | 36.441002 | 27.570999 | 48.958000 | C                  | 36.444000 | 27.559999 | 48.956001 |
| N                  | 40.316002 | 29.495001 | 48.073002 | N                  | 40.324001 | 29.474001 | 48.074001 |
| C                  | 35.629002 | 27.798000 | 47.897999 | C                  | 35.632999 | 27.790001 | 47.896000 |
| C                  | 37.735001 | 28.121000 | 48.622002 | C                  | 37.740002 | 28.107000 | 48.620998 |
| C                  | 38.846001 | 28.104000 | 49.464001 | C                  | 38.849998 | 28.087999 | 49.464001 |
| C                  | 36.417999 | 28.476999 | 46.893002 | C                  | 36.424000 | 28.469000 | 46.890999 |
| C                  | 35.986000 | 28.820000 | 45.618999 | C                  | 35.993000 | 28.813000 | 45.618000 |
| C                  | 36.749001 | 29.400999 | 44.598000 | C                  | 36.757999 | 29.391001 | 44.597000 |
| C                  | 36.293999 | 29.587999 | 43.233002 | C                  | 36.304001 | 29.580000 | 43.230999 |
| C                  | 37.366001 | 30.152000 | 42.589001 | C                  | 37.377998 | 30.139000 | 42.587002 |
| C                  | 38.439999 | 30.291000 | 43.534000 | C                  | 38.452999 | 30.273001 | 43.530998 |
| C                  | 39.695000 | 30.841000 | 43.257999 | C                  | 39.709999 | 30.820000 | 43.256001 |
| C                  | 40.728001 | 31.042000 | 44.165001 | C                  | 40.742001 | 31.020000 | 44.162998 |
| C                  | 41.991001 | 31.694000 | 43.847000 | C                  | 42.004002 | 31.674000 | 43.848000 |
| C                  | 42.669998 | 31.679001 | 45.035999 | C                  | 42.683998 | 31.658001 | 45.036999 |
| C                  | 41.848999 | 31.054001 | 46.035999 | C                  | 41.861000 | 31.031000 | 46.035999 |
| C                  | 42.205002 | 30.888000 | 47.384998 | C                  | 42.216000 | 30.864000 | 47.386002 |
| C                  | 41.490002 | 30.187000 | 48.334000 | C                  | 41.498001 | 30.167000 | 48.334000 |
| C                  | 41.883999 | 29.986000 | 49.710999 | C                  | 41.888000 | 29.969000 | 49.713001 |
| C                  | 40.014999 | 28.834999 | 49.235001 | C                  | 40.020000 | 28.816999 | 49.236000 |
| C                  | 41.014000 | 29.101000 | 50.247002 | C                  | 41.016998 | 29.084000 | 50.249001 |
| H                  | 38.780998 | 27.542000 | 50.389999 | H                  | 38.783001 | 27.525999 | 50.389999 |
| H                  | 34.959000 | 28.569000 | 45.375000 | H                  | 34.965000 | 28.565001 | 45.374001 |
| H                  | 39.869999 | 31.164000 | 42.237000 | H                  | 39.886002 | 31.143000 | 42.236000 |
| H                  | 43.152000 | 31.311001 | 47.701000 | H                  | 43.161999 | 31.287001 | 47.702999 |
| Fe                 | 39.134998 | 29.757999 | 46.459999 | Fe                 | 39.146000 | 29.733000 | 46.458000 |
| C                  | 38.924000 | 33.422001 | 50.333000 | C                  | 38.951000 | 33.459000 | 50.297001 |
| C                  | 38.355000 | 34.568001 | 49.943001 | C                  | 38.387001 | 34.605999 | 49.900002 |
| C                  | 37.233002 | 34.723999 | 49.002998 | C                  | 37.276001 | 34.759998 | 48.945999 |
| C                  | 36.758999 | 33.672001 | 48.191002 | C                  | 36.827999 | 33.710999 | 48.116001 |
| C                  | 36.598000 | 35.973999 | 48.902000 | C                  | 36.622002 | 36.000000 | 48.855999 |
| C                  | 35.696999 | 33.875999 | 47.311001 | C                  | 35.768002 | 33.907001 | 47.231998 |
| C                  | 35.521000 | 36.167999 | 48.037998 | C                  | 35.549000 | 36.187000 | 47.986000 |
| C                  | 35.070000 | 35.123001 | 47.231998 | C                  | 35.119999 | 35.145000 | 47.164001 |
| H                  | 39.737000 | 33.421001 | 51.050999 | H                  | 39.754002 | 33.457001 | 51.026001 |
| H                  | 38.598999 | 32.452999 | 49.966000 | H                  | 38.631001 | 32.491001 | 49.924000 |
| H                  | 38.726002 | 35.505001 | 50.362000 | H                  | 38.749001 | 35.542999 | 50.327999 |
| H                  | 37.237000 | 32.698002 | 48.224998 | H                  | 37.320999 | 32.743999 | 48.144001 |
| H                  | 36.953999 | 36.801998 | 49.514000 | H                  | 36.957001 | 36.825001 | 49.483002 |
| H                  | 35.358002 | 33.062000 | 46.675999 | H                  | 35.445000 | 33.095001 | 46.587002 |
| H                  | 35.040001 | 37.141998 | 47.995998 | H                  | 35.050999 | 37.153999 | 47.953999 |
| H                  | 34.245998 | 35.275002 | 46.541000 | H                  | 34.297001 | 35.290001 | 46.471001 |
| O                  | 38.562000 | 31.174999 | 47.028000 | O                  | 38.585999 | 31.159000 | 47.019001 |

LA1-TS1<sup>d</sup>

|    |           |           |           |
|----|-----------|-----------|-----------|
| S  | 39.855999 | 27.641001 | 45.418999 |
| C  | 40.987000 | 26.707001 | 46.525002 |
| H  | 41.728001 | 26.177999 | 45.917999 |
| H  | 41.507000 | 27.391001 | 47.194000 |
| N  | 37.699001 | 28.715000 | 47.407001 |
| N  | 38.047001 | 29.839001 | 44.785999 |
| N  | 40.674000 | 30.674000 | 45.513000 |
| C  | 36.445999 | 27.580999 | 48.980999 |
| N  | 40.306999 | 29.506001 | 48.104000 |
| C  | 35.636002 | 27.816999 | 47.919998 |
| C  | 37.741001 | 28.128000 | 48.655998 |
| C  | 38.848999 | 28.096001 | 49.499001 |
| C  | 36.424000 | 28.504000 | 46.919998 |
| C  | 35.988998 | 28.840000 | 45.646000 |
| C  | 36.750999 | 29.430000 | 44.634998 |
| C  | 36.289001 | 29.643000 | 43.273998 |
| C  | 37.358002 | 30.212000 | 42.632000 |
| C  | 38.443001 | 30.333000 | 43.568001 |
| C  | 39.693001 | 30.879000 | 43.286999 |
| C  | 40.723000 | 31.070999 | 44.199001 |
| C  | 41.987999 | 31.726000 | 43.888000 |
| C  | 42.668999 | 31.702000 | 45.074001 |
| C  | 41.853001 | 31.068001 | 46.075001 |
| C  | 42.212002 | 30.889999 | 47.411999 |
| C  | 41.487000 | 30.184999 | 48.356998 |
| C  | 41.887001 | 29.971001 | 49.729000 |
| C  | 40.012001 | 28.820999 | 49.266998 |
| C  | 41.020000 | 29.082001 | 50.266998 |
| H  | 38.784000 | 27.525000 | 50.417000 |
| H  | 34.965000 | 28.579000 | 45.397999 |
| H  | 39.865002 | 31.212999 | 42.270000 |
| H  | 43.166000 | 31.294001 | 47.730000 |
| Fe | 39.145000 | 29.754000 | 46.493999 |
| C  | 37.801998 | 31.650000 | 48.818001 |
| C  | 38.220001 | 32.911999 | 49.174000 |
| C  | 37.535000 | 34.147999 | 48.860001 |
| C  | 36.436001 | 34.217999 | 47.967999 |
| C  | 37.959999 | 35.344002 | 49.484001 |
| C  | 35.777000 | 35.421001 | 47.744999 |
| C  | 37.284000 | 36.539001 | 49.272999 |
| C  | 36.187000 | 36.584000 | 48.408001 |
| H  | 38.292000 | 30.797001 | 49.259998 |
| H  | 36.807999 | 31.476000 | 48.423000 |
| H  | 39.139000 | 33.011002 | 49.745998 |
| H  | 36.109001 | 33.327000 | 47.441002 |
| H  | 38.820999 | 35.318001 | 50.146000 |
| H  | 34.941002 | 35.457001 | 47.049999 |
| H  | 37.611000 | 37.443001 | 49.778000 |
| H  | 35.665001 | 37.522999 | 48.249001 |
| O  | 38.577000 | 31.257999 | 46.966999 |

LA1-TS1<sup>a</sup>

|    |           |           |           |
|----|-----------|-----------|-----------|
| S  | 39.820000 | 27.584999 | 45.431999 |
| C  | 40.957001 | 26.653000 | 46.530998 |
| H  | 41.695000 | 26.122999 | 45.921001 |
| H  | 41.480000 | 27.341000 | 47.195000 |
| N  | 37.727001 | 28.705000 | 47.396000 |
| N  | 38.068001 | 29.858999 | 44.782001 |
| N  | 40.692001 | 30.684000 | 45.497002 |
| C  | 36.477001 | 27.575001 | 48.980999 |
| N  | 40.347000 | 29.504999 | 48.094002 |
| C  | 35.655998 | 27.827999 | 47.931999 |
| C  | 37.772999 | 28.115999 | 48.640999 |
| C  | 38.893002 | 28.082001 | 49.473000 |
| C  | 36.444000 | 28.518000 | 46.931000 |
| C  | 36.007000 | 28.879000 | 45.660000 |
| C  | 36.769001 | 29.452999 | 44.637001 |
| C  | 36.306999 | 29.639000 | 43.271000 |
| C  | 37.381001 | 30.184000 | 42.616001 |
| C  | 38.464001 | 30.319000 | 43.553001 |
| C  | 39.720001 | 30.860001 | 43.271000 |
| C  | 40.750999 | 31.068001 | 44.181000 |
| C  | 42.013000 | 31.726000 | 43.868999 |
| C  | 42.688000 | 31.714001 | 45.060001 |
| C  | 41.866001 | 31.084000 | 46.060001 |
| C  | 42.223000 | 30.912001 | 47.403999 |
| C  | 41.513000 | 30.198999 | 48.355000 |
| C  | 41.915001 | 29.990000 | 49.730000 |
| C  | 40.056999 | 28.822001 | 49.249001 |
| C  | 41.054001 | 29.091000 | 50.262001 |
| H  | 38.834000 | 27.504000 | 50.389000 |
| H  | 34.977001 | 28.636000 | 45.418999 |
| H  | 39.896000 | 31.177000 | 42.248001 |
| H  | 43.172001 | 31.330999 | 47.720001 |
| Fe | 39.174999 | 29.761000 | 46.459000 |
| C  | 37.852001 | 31.617001 | 48.830002 |
| C  | 38.265999 | 32.874001 | 49.216000 |
| C  | 37.584999 | 34.117001 | 48.909000 |
| C  | 36.492001 | 34.198002 | 48.012001 |
| C  | 38.008999 | 35.308998 | 49.541000 |
| C  | 35.838001 | 35.405998 | 47.791000 |
| C  | 37.339001 | 36.507999 | 49.332001 |
| C  | 36.247002 | 36.563999 | 48.460999 |
| H  | 38.325001 | 30.760000 | 49.283001 |
| H  | 36.848000 | 31.455999 | 48.455002 |
| H  | 39.187000 | 32.966999 | 49.786999 |
| H  | 36.164001 | 33.311001 | 47.478001 |
| H  | 38.867001 | 35.278000 | 50.207001 |
| H  | 35.006001 | 35.446999 | 47.091999 |
| H  | 37.667999 | 37.407001 | 49.845001 |
| H  | 35.730999 | 37.507000 | 48.301998 |
| O  | 38.602001 | 31.274000 | 47.009998 |

LA1-Int1<sup>d</sup>

|    |           |           |           |
|----|-----------|-----------|-----------|
| S  | 39.867001 | 27.629000 | 45.409000 |
| C  | 40.985001 | 26.681000 | 46.519001 |
| H  | 41.719002 | 26.142000 | 45.911999 |
| H  | 41.514000 | 27.363001 | 47.183998 |
| N  | 37.709000 | 28.679001 | 47.417000 |
| N  | 38.040001 | 29.850000 | 44.794998 |
| N  | 40.653999 | 30.683001 | 45.514999 |
| C  | 36.445999 | 27.556000 | 48.997002 |
| N  | 40.305000 | 29.482000 | 48.119999 |
| C  | 35.634998 | 27.799000 | 47.938999 |
| C  | 37.744999 | 28.094000 | 48.665001 |
| C  | 38.859001 | 28.061001 | 49.504002 |
| C  | 36.429001 | 28.482000 | 46.938999 |
| C  | 35.995998 | 28.837000 | 45.667999 |
| C  | 36.747002 | 29.436001 | 44.647999 |
| C  | 36.272999 | 29.646999 | 43.291000 |
| C  | 37.335999 | 30.219000 | 42.641998 |
| C  | 38.423000 | 30.341999 | 43.575001 |
| C  | 39.675999 | 30.893000 | 43.294998 |
| C  | 40.712002 | 31.083000 | 44.202999 |
| C  | 41.979000 | 31.732000 | 43.891998 |
| C  | 42.658001 | 31.701000 | 45.080002 |
| C  | 41.833000 | 31.066999 | 46.075001 |
| C  | 42.189999 | 30.881001 | 47.419998 |
| C  | 41.479000 | 30.171000 | 48.370998 |
| C  | 41.886002 | 29.965000 | 49.744999 |
| C  | 40.021999 | 28.801001 | 49.279999 |
| C  | 41.025002 | 29.072001 | 50.285999 |
| H  | 38.798000 | 27.483999 | 50.421001 |
| H  | 34.969002 | 28.580999 | 45.423000 |
| H  | 39.846001 | 31.226999 | 42.277000 |
| H  | 43.141998 | 31.291000 | 47.735001 |
| Fe | 39.165001 | 29.687000 | 46.476002 |
| C  | 37.868999 | 31.500000 | 48.311001 |
| C  | 38.244999 | 32.832001 | 48.866001 |
| C  | 37.484001 | 34.022999 | 48.792000 |
| C  | 36.228001 | 34.105999 | 48.116001 |
| C  | 37.970001 | 35.207001 | 49.424999 |
| C  | 35.511002 | 35.292000 | 48.092999 |
| C  | 37.234001 | 36.380001 | 49.410000 |
| C  | 36.000000 | 36.432999 | 48.745998 |
| H  | 38.169998 | 30.733000 | 49.033001 |
| H  | 36.780998 | 31.407000 | 48.175999 |
| H  | 39.233002 | 32.908001 | 49.313999 |
| H  | 35.840000 | 33.237000 | 47.594002 |
| H  | 38.930000 | 35.174999 | 49.932999 |
| H  | 34.563999 | 35.340000 | 47.561001 |
| H  | 37.615002 | 37.265999 | 49.910000 |
| H  | 35.431999 | 37.359001 | 48.729000 |
| O  | 38.537998 | 31.344999 | 47.070999 |

LA1-Int1<sup>a</sup>

|    |           |           |           |
|----|-----------|-----------|-----------|
| S  | 39.824001 | 27.646999 | 45.483002 |
| C  | 40.964001 | 26.707001 | 46.567001 |
| H  | 41.707001 | 26.195999 | 45.948002 |
| H  | 41.478001 | 27.385000 | 47.248001 |
| N  | 37.672001 | 28.724001 | 47.446999 |
| N  | 38.023998 | 29.837999 | 44.837002 |
| N  | 40.638000 | 30.684999 | 45.550999 |
| C  | 36.431000 | 27.587000 | 49.022999 |
| N  | 40.314999 | 29.445999 | 48.115002 |
| C  | 35.611000 | 27.841000 | 47.971001 |
| C  | 37.727001 | 28.122000 | 48.693001 |
| C  | 38.838001 | 28.065001 | 49.525002 |
| C  | 36.390999 | 28.527000 | 46.969002 |
| C  | 35.946999 | 28.864000 | 45.699001 |
| C  | 36.717999 | 29.440001 | 44.691002 |
| C  | 36.259998 | 29.653000 | 43.332001 |
| C  | 37.331001 | 30.209000 | 42.683998 |
| C  | 38.422001 | 30.330000 | 43.612000 |
| C  | 39.661999 | 30.881001 | 43.320000 |
| C  | 40.688999 | 31.075001 | 44.235001 |
| C  | 41.952999 | 31.728001 | 43.925999 |
| C  | 42.639000 | 31.701000 | 45.111000 |
| C  | 41.827999 | 31.066000 | 46.112999 |
| C  | 42.201000 | 30.872999 | 47.438999 |
| C  | 41.484001 | 30.145000 | 48.372002 |
| C  | 41.877998 | 29.933001 | 49.743000 |
| C  | 40.006001 | 28.775000 | 49.285000 |
| C  | 41.012001 | 29.040001 | 50.280998 |
| H  | 38.771000 | 27.495001 | 50.444000 |
| H  | 34.921001 | 28.611000 | 45.453999 |
| H  | 39.832001 | 31.211000 | 42.301998 |
| H  | 43.154999 | 31.275999 | 47.757000 |
| Fe | 39.139999 | 29.698000 | 46.513000 |
| C  | 37.910000 | 31.507999 | 48.415001 |
| C  | 38.191002 | 32.905998 | 48.849998 |
| C  | 37.337002 | 34.026001 | 48.699001 |
| C  | 36.061001 | 33.963001 | 48.063000 |
| C  | 37.749001 | 35.290001 | 49.221001 |
| C  | 35.248001 | 35.084000 | 47.987000 |
| C  | 36.923000 | 36.400002 | 49.146000 |
| C  | 35.664001 | 36.304001 | 48.537998 |
| H  | 38.278999 | 30.811001 | 49.174999 |
| H  | 36.839001 | 31.316999 | 48.276001 |
| H  | 39.172001 | 33.088001 | 49.282001 |
| H  | 35.723999 | 33.032001 | 47.619999 |
| H  | 38.724998 | 35.369999 | 49.693001 |
| H  | 34.283001 | 35.019001 | 47.490002 |
| H  | 37.254002 | 37.349998 | 49.556999 |
| H  | 35.016998 | 37.176998 | 48.488998 |
| O  | 38.603001 | 31.313999 | 47.181000 |

LA1-TS2<sup>a</sup>

|    |           |           |           |
|----|-----------|-----------|-----------|
| S  | 39.833000 | 27.587000 | 45.437000 |
| C  | 40.973999 | 26.658001 | 46.534000 |
| H  | 41.717999 | 26.127001 | 45.931999 |
| H  | 41.487999 | 27.350000 | 47.201000 |
| N  | 37.673000 | 28.729000 | 47.474998 |
| N  | 37.994999 | 29.885000 | 44.879002 |
| N  | 40.613998 | 30.719000 | 45.577000 |
| C  | 36.443001 | 27.589001 | 49.057999 |
| N  | 40.328999 | 29.438000 | 48.129002 |
| C  | 35.610001 | 27.861000 | 48.021000 |
| C  | 37.740002 | 28.113001 | 48.714001 |
| C  | 38.860001 | 28.045000 | 49.534000 |
| C  | 36.383999 | 28.548000 | 47.014000 |
| C  | 35.926998 | 28.900999 | 45.752998 |
| C  | 36.689999 | 29.483000 | 44.741001 |
| C  | 36.223000 | 29.691999 | 43.383999 |
| C  | 37.290001 | 30.247999 | 42.728001 |
| C  | 38.384998 | 30.374001 | 43.650002 |
| C  | 39.625000 | 30.924000 | 43.352001 |
| C  | 40.659000 | 31.114000 | 44.261002 |
| C  | 41.924999 | 31.757000 | 43.944000 |
| C  | 42.619999 | 31.721001 | 45.125000 |
| C  | 41.813999 | 31.087999 | 46.130001 |
| C  | 42.199001 | 30.879999 | 47.452000 |
| C  | 41.493000 | 30.143000 | 48.386002 |
| C  | 41.890999 | 29.930000 | 49.756001 |
| C  | 40.026001 | 28.761000 | 49.294998 |
| C  | 41.029999 | 29.032000 | 50.293999 |
| H  | 38.800999 | 27.465000 | 50.448002 |
| H  | 34.897999 | 28.653000 | 45.516998 |
| H  | 39.790001 | 31.254000 | 42.333000 |
| H  | 43.155998 | 31.281000 | 47.764000 |
| Fe | 39.140999 | 29.693001 | 46.526001 |
| C  | 37.858002 | 31.455999 | 48.528000 |
| C  | 38.193001 | 32.846001 | 48.915001 |
| C  | 37.398998 | 34.001999 | 48.691002 |
| C  | 36.146999 | 33.963001 | 48.013000 |
| C  | 37.839001 | 35.252998 | 49.212002 |
| C  | 35.373001 | 35.108002 | 47.895000 |
| C  | 37.043999 | 36.382999 | 49.112000 |
| C  | 35.806999 | 36.316002 | 48.459000 |
| H  | 38.222000 | 30.745001 | 49.276001 |
| H  | 36.785000 | 31.285999 | 48.375000 |
| H  | 39.180000 | 32.999001 | 49.345001 |
| H  | 35.805000 | 33.035999 | 47.564999 |
| H  | 38.801998 | 35.306999 | 49.714001 |
| H  | 34.426998 | 35.069000 | 47.361000 |
| H  | 37.379002 | 37.325001 | 49.536999 |
| H  | 35.188000 | 37.206001 | 48.382999 |
| O  | 38.590000 | 31.388000 | 47.317001 |

LA1-2-S<sup>d</sup>

|    |           |           |           |
|----|-----------|-----------|-----------|
| S  | 39.679001 | 27.391001 | 45.354000 |
| C  | 40.853001 | 26.617001 | 46.535000 |
| H  | 41.653999 | 26.139999 | 45.962002 |
| H  | 41.287998 | 27.361000 | 47.201000 |
| N  | 37.228001 | 28.393999 | 46.907001 |
| N  | 37.848999 | 29.504000 | 44.373001 |
| N  | 40.352001 | 30.455999 | 45.415001 |
| C  | 35.903999 | 27.122999 | 48.320999 |
| N  | 39.733002 | 29.311001 | 47.946999 |
| C  | 35.257999 | 27.204000 | 47.125999 |
| C  | 37.133999 | 27.867001 | 48.182999 |
| C  | 38.066002 | 28.023001 | 49.202999 |
| C  | 36.089001 | 27.982000 | 46.237000 |
| C  | 35.804001 | 28.268999 | 44.908001 |
| C  | 36.623001 | 28.986000 | 44.036999 |
| C  | 36.306999 | 29.238001 | 42.640999 |
| C  | 37.390999 | 29.919001 | 42.159000 |
| C  | 38.344002 | 30.082001 | 43.226002 |
| C  | 39.573002 | 30.722000 | 43.109001 |
| C  | 40.507000 | 30.900000 | 44.123001 |
| C  | 41.792000 | 31.562000 | 43.933998 |
| C  | 42.397999 | 31.466999 | 45.158001 |
| C  | 41.509998 | 30.796000 | 46.070000 |
| C  | 41.787998 | 30.539000 | 47.409000 |
| C  | 40.955002 | 29.860001 | 48.285000 |
| C  | 41.249001 | 29.596001 | 49.675999 |
| C  | 39.272999 | 28.697001 | 49.097000 |
| C  | 40.223000 | 28.870001 | 50.178001 |
| H  | 37.825001 | 27.577000 | 50.154999 |
| H  | 34.868999 | 27.888000 | 44.508999 |
| H  | 39.830002 | 31.108000 | 42.129002 |
| H  | 42.737999 | 30.889999 | 47.796001 |
| Fe | 38.828999 | 29.326000 | 46.137001 |
| C  | 36.521999 | 31.546000 | 46.651001 |
| C  | 37.198002 | 31.514000 | 47.956001 |
| C  | 37.637001 | 32.723000 | 48.706001 |
| C  | 37.221001 | 34.015999 | 48.356998 |
| C  | 38.540001 | 32.556000 | 49.769001 |
| C  | 37.727001 | 35.125000 | 49.039001 |
| C  | 39.043999 | 33.662998 | 50.446999 |
| C  | 38.646000 | 34.950001 | 50.074001 |
| H  | 35.898998 | 30.707001 | 46.361000 |
| H  | 36.297001 | 32.493000 | 46.167000 |
| H  | 37.081001 | 30.607000 | 48.539001 |
| H  | 36.502998 | 34.167999 | 47.556000 |
| H  | 38.859001 | 31.558001 | 50.053001 |
| H  | 37.401001 | 36.124001 | 48.757000 |
| H  | 39.751999 | 33.530998 | 51.257999 |
| H  | 39.051998 | 35.818001 | 50.587002 |
| O  | 37.939999 | 31.249001 | 46.706001 |

LA1-2-S<sup>a</sup>

|    |           |           |           |
|----|-----------|-----------|-----------|
| S  | 39.793999 | 27.214001 | 45.262001 |
| C  | 40.924999 | 26.459999 | 46.499001 |
| H  | 41.735001 | 25.945000 | 45.976002 |
| H  | 41.352001 | 27.229000 | 47.141998 |
| N  | 37.261002 | 28.421000 | 46.924999 |
| N  | 37.884998 | 29.534000 | 44.380001 |
| N  | 40.369999 | 30.499001 | 45.407001 |
| C  | 35.932999 | 27.150000 | 48.337002 |
| N  | 39.755001 | 29.337999 | 47.933998 |
| C  | 35.290001 | 27.233000 | 47.140999 |
| C  | 37.161999 | 27.896000 | 48.200001 |
| C  | 38.097000 | 28.046000 | 49.215000 |
| C  | 36.123001 | 28.011999 | 46.254002 |
| C  | 35.840000 | 28.292999 | 44.924999 |
| C  | 36.658001 | 29.007000 | 44.049999 |
| C  | 36.340000 | 29.249001 | 42.657001 |
| C  | 37.416000 | 29.945000 | 42.169998 |
| C  | 38.368999 | 30.120001 | 43.229000 |
| C  | 39.587002 | 30.775999 | 43.105000 |
| C  | 40.520000 | 30.955000 | 44.118000 |
| C  | 41.803001 | 31.615999 | 43.929001 |
| C  | 42.414001 | 31.513000 | 45.150002 |
| C  | 41.529999 | 30.837999 | 46.061001 |
| C  | 41.814999 | 30.570999 | 47.396000 |
| C  | 40.985001 | 29.886999 | 48.266998 |
| C  | 41.283001 | 29.615999 | 49.651001 |
| C  | 39.300999 | 28.716999 | 49.094002 |
| C  | 40.258999 | 28.884001 | 50.159000 |
| H  | 37.862000 | 27.601000 | 50.168999 |
| H  | 34.908001 | 27.907000 | 44.525002 |
| H  | 39.839001 | 31.166000 | 42.125999 |
| H  | 42.766998 | 30.917999 | 47.782001 |
| Fe | 38.883999 | 29.312000 | 46.124001 |
| C  | 36.334999 | 31.739000 | 46.712002 |
| C  | 37.078999 | 31.705999 | 47.980000 |
| C  | 37.521000 | 32.911999 | 48.736000 |
| C  | 37.091000 | 34.208000 | 48.415001 |
| C  | 38.463001 | 32.737999 | 49.762001 |
| C  | 37.617001 | 35.311001 | 49.090000 |
| C  | 38.991001 | 33.840000 | 50.431999 |
| C  | 38.574001 | 35.129002 | 50.090000 |
| H  | 35.728001 | 30.882000 | 46.435001 |
| H  | 36.035999 | 32.686001 | 46.268002 |
| H  | 37.021999 | 30.785999 | 48.555000 |
| H  | 36.346001 | 34.365002 | 47.639000 |
| H  | 38.794998 | 31.739000 | 50.023998 |
| H  | 37.278000 | 36.312000 | 48.831001 |
| H  | 39.730000 | 33.700001 | 51.214001 |
| H  | 38.993999 | 35.993000 | 50.598999 |
| O  | 37.757999 | 31.493999 | 46.696999 |

LA1-Int2<sup>d</sup>

|    |           |           |           |
|----|-----------|-----------|-----------|
| S  | 39.813000 | 27.705999 | 45.506001 |
| C  | 40.952999 | 26.736000 | 46.577000 |
| H  | 41.680000 | 26.209999 | 45.949001 |
| H  | 41.487999 | 27.406000 | 47.247002 |
| N  | 37.752998 | 28.826000 | 47.541000 |
| N  | 38.061001 | 29.980000 | 44.910999 |
| N  | 40.720001 | 30.702000 | 45.566002 |
| C  | 36.504002 | 27.698999 | 49.125000 |
| N  | 40.411999 | 29.500000 | 48.168999 |
| C  | 35.671001 | 27.999001 | 48.099998 |
| C  | 37.810001 | 28.212000 | 48.771000 |
| C  | 38.937000 | 28.131001 | 49.589001 |
| C  | 36.459000 | 28.677999 | 47.089001 |
| C  | 35.998001 | 29.046000 | 45.833000 |
| C  | 36.757000 | 29.601000 | 44.794998 |
| C  | 36.271999 | 29.781000 | 43.431999 |
| C  | 37.345001 | 30.285000 | 42.748001 |
| C  | 38.452999 | 30.410999 | 43.665001 |
| C  | 39.710999 | 30.913000 | 43.349998 |
| C  | 40.762001 | 31.090000 | 44.251999 |
| C  | 42.028999 | 31.738001 | 43.928001 |
| C  | 42.721001 | 31.716999 | 45.112000 |
| C  | 41.912998 | 31.084999 | 46.120998 |
| C  | 42.289001 | 30.899000 | 47.452000 |
| C  | 41.589001 | 30.166000 | 48.408001 |
| C  | 42.000999 | 29.962999 | 49.785999 |
| C  | 40.109001 | 28.827999 | 49.345001 |
| C  | 41.131001 | 29.086000 | 50.335999 |
| H  | 38.873001 | 27.554001 | 50.502998 |
| H  | 34.959000 | 28.819000 | 45.612999 |
| H  | 39.881001 | 31.219000 | 42.324001 |
| H  | 43.250000 | 31.297001 | 47.755001 |
| Fe | 39.237000 | 29.729000 | 46.548000 |
| C  | 39.054001 | 31.948999 | 48.452999 |
| C  | 38.395000 | 33.105999 | 49.040001 |
| C  | 37.251999 | 33.799000 | 48.583000 |
| C  | 36.481998 | 33.335999 | 47.474998 |
| C  | 36.839001 | 34.984001 | 49.258999 |
| C  | 35.340000 | 34.023998 | 47.090000 |
| C  | 35.707001 | 35.666000 | 48.851002 |
| C  | 34.952999 | 35.182999 | 47.770000 |
| H  | 40.148998 | 32.216999 | 48.487999 |
| H  | 39.054001 | 31.173000 | 49.264000 |
| H  | 38.879002 | 33.492001 | 49.937000 |
| H  | 36.805000 | 32.441002 | 46.958000 |
| H  | 37.431000 | 35.355999 | 50.091000 |
| H  | 34.761002 | 33.674000 | 46.243000 |
| H  | 35.404999 | 36.581001 | 49.353001 |
| H  | 34.063999 | 35.723999 | 47.455002 |
| O  | 38.661999 | 31.486000 | 47.243000 |



LA1-Int2<sup>a</sup>

|    |           |           |           |
|----|-----------|-----------|-----------|
| S  | 39.835999 | 27.554001 | 45.382999 |
| C  | 40.979000 | 26.643000 | 46.502998 |
| H  | 41.716999 | 26.075001 | 45.929001 |
| H  | 41.504002 | 27.354000 | 47.143002 |
| N  | 37.709000 | 28.900999 | 47.485001 |
| N  | 38.047001 | 30.021000 | 44.862999 |
| N  | 40.717999 | 30.740000 | 45.519001 |
| C  | 36.472000 | 27.756001 | 49.066002 |
| N  | 40.384998 | 29.566000 | 48.112000 |
| C  | 35.634998 | 28.063000 | 48.043999 |
| C  | 37.773998 | 28.275000 | 48.715000 |
| C  | 38.897999 | 28.195000 | 49.528000 |
| C  | 36.417000 | 28.747999 | 47.035999 |
| C  | 35.960999 | 29.110001 | 45.775002 |
| C  | 36.735001 | 29.643999 | 44.742001 |
| C  | 36.271999 | 29.804001 | 43.375000 |
| C  | 37.355999 | 30.292000 | 42.693001 |
| C  | 38.455002 | 30.430000 | 43.612000 |
| C  | 39.716999 | 30.924000 | 43.296001 |
| C  | 40.765999 | 31.106001 | 44.195999 |
| C  | 42.041000 | 31.733999 | 43.867001 |
| C  | 42.730999 | 31.719999 | 45.050999 |
| C  | 41.917000 | 31.113001 | 46.069000 |
| C  | 42.292999 | 30.934999 | 47.398998 |
| C  | 41.573002 | 30.230000 | 48.354000 |
| C  | 41.971001 | 30.020000 | 49.729000 |
| C  | 40.075001 | 28.896000 | 49.284000 |
| C  | 41.091999 | 29.145000 | 50.276001 |
| H  | 38.840000 | 27.611000 | 50.439999 |
| H  | 34.924999 | 28.882000 | 45.547001 |
| H  | 39.893002 | 31.212000 | 42.264999 |
| H  | 43.258999 | 31.320999 | 47.702999 |
| Fe | 39.216999 | 29.778999 | 46.487000 |
| C  | 38.830002 | 32.030998 | 48.587002 |
| C  | 38.016998 | 32.942001 | 49.374001 |
| C  | 36.813999 | 33.592999 | 49.009998 |
| C  | 36.301998 | 33.520000 | 47.685001 |
| C  | 36.101002 | 34.341999 | 49.987999 |
| C  | 35.130001 | 34.192001 | 47.359001 |
| C  | 34.923000 | 34.986000 | 49.654999 |
| C  | 34.442001 | 34.917000 | 48.337002 |
| H  | 39.898998 | 32.292000 | 48.813999 |
| H  | 38.764999 | 31.132000 | 49.284000 |
| H  | 38.380001 | 33.098999 | 50.389999 |
| H  | 36.849998 | 32.938999 | 46.953999 |
| H  | 36.488998 | 34.398998 | 51.000999 |
| H  | 34.754002 | 34.158001 | 46.341999 |
| H  | 34.372002 | 35.551998 | 50.402000 |
| H  | 33.523998 | 35.439999 | 48.077999 |
| O  | 38.588001 | 31.733000 | 47.310001 |

LA1-TS3-cis-re<sup>d</sup>

|    |           |           |           |
|----|-----------|-----------|-----------|
| S  | 39.832001 | 27.760000 | 45.498001 |
| C  | 40.953999 | 26.778000 | 46.576000 |
| H  | 41.678001 | 26.250000 | 45.948002 |
| H  | 41.492001 | 27.443001 | 47.250000 |
| N  | 37.756001 | 28.841999 | 47.547001 |
| N  | 38.050999 | 30.018000 | 44.931000 |
| N  | 40.703999 | 30.760000 | 45.584000 |
| C  | 36.519001 | 27.702999 | 49.133999 |
| N  | 40.426998 | 29.514999 | 48.166000 |
| C  | 35.687000 | 27.982000 | 48.101002 |
| C  | 37.816002 | 28.235001 | 48.786999 |
| C  | 38.942001 | 28.174999 | 49.602001 |
| C  | 36.466000 | 28.671000 | 47.092999 |
| C  | 35.999001 | 29.039000 | 45.837002 |
| C  | 36.749001 | 29.618999 | 44.811001 |
| C  | 36.261002 | 29.809000 | 43.452999 |
| C  | 37.326000 | 30.336000 | 42.772999 |
| C  | 38.432999 | 30.466000 | 43.688999 |
| C  | 39.685001 | 30.983000 | 43.370998 |
| C  | 40.740002 | 31.152000 | 44.264999 |
| C  | 42.013000 | 31.778999 | 43.930000 |
| C  | 42.719002 | 31.737000 | 45.105000 |
| C  | 41.914001 | 31.112000 | 46.119999 |
| C  | 42.313999 | 30.903999 | 47.442001 |
| C  | 41.613998 | 30.186001 | 48.396999 |
| C  | 42.021999 | 29.987000 | 49.775002 |
| C  | 40.125000 | 28.862000 | 49.341000 |
| C  | 41.144001 | 29.120001 | 50.332001 |
| H  | 38.882000 | 27.606001 | 50.521999 |
| H  | 34.965000 | 28.796000 | 45.612999 |
| H  | 39.848000 | 31.298000 | 42.346001 |
| H  | 43.279999 | 31.295000 | 47.737000 |
| Fe | 39.238998 | 29.749001 | 46.558998 |
| C  | 38.777000 | 31.771000 | 48.672001 |
| C  | 37.969002 | 32.693001 | 49.426998 |
| C  | 36.758999 | 33.346001 | 49.043999 |
| C  | 36.269001 | 33.305000 | 47.713001 |
| C  | 36.058998 | 34.106998 | 50.016998 |
| C  | 35.129002 | 34.026001 | 47.375999 |
| C  | 34.916000 | 34.808998 | 49.671001 |
| C  | 34.456001 | 34.772999 | 48.347000 |
| H  | 39.804001 | 31.698000 | 49.070999 |
| H  | 38.248001 | 30.993000 | 49.396999 |
| H  | 38.306000 | 32.834999 | 50.453999 |
| H  | 36.792999 | 32.705002 | 46.980000 |
| H  | 36.433998 | 34.139999 | 51.036999 |
| H  | 34.769001 | 34.014000 | 46.352001 |
| H  | 34.381001 | 35.391998 | 50.415001 |
| H  | 33.566002 | 35.337002 | 48.075001 |
| O  | 38.603001 | 31.514000 | 47.386002 |

LA1-TS3-cis-re<sup>a</sup>

|    |           |           |           |
|----|-----------|-----------|-----------|
| S  | 39.803001 | 27.565001 | 45.410999 |
| C  | 40.959000 | 26.649000 | 46.514999 |
| H  | 41.698002 | 26.093000 | 45.930000 |
| H  | 41.480999 | 27.355000 | 47.160000 |
| N  | 37.700001 | 28.908001 | 47.542000 |
| N  | 38.014000 | 30.052000 | 44.932999 |
| N  | 40.682999 | 30.778999 | 45.576000 |
| C  | 36.477001 | 27.747999 | 49.124001 |
| N  | 40.387001 | 29.556000 | 48.147999 |
| C  | 35.630001 | 28.066999 | 48.112999 |
| C  | 37.775002 | 28.270000 | 48.764999 |
| C  | 38.908001 | 28.181999 | 49.566002 |
| C  | 36.402000 | 28.760000 | 47.105000 |
| C  | 35.935001 | 29.131001 | 45.851002 |
| C  | 36.702000 | 29.671000 | 44.817001 |
| C  | 36.230999 | 29.834000 | 43.453999 |
| C  | 37.310001 | 30.327999 | 42.768002 |
| C  | 38.411999 | 30.468000 | 43.681000 |
| C  | 39.667999 | 30.972000 | 43.359001 |
| C  | 40.721001 | 31.153000 | 44.252998 |
| C  | 41.995998 | 31.774000 | 43.916000 |
| C  | 42.699001 | 31.745001 | 45.091999 |
| C  | 41.894001 | 31.136000 | 46.112999 |
| C  | 42.285999 | 30.940001 | 47.437000 |
| C  | 41.576000 | 30.225000 | 48.388000 |
| C  | 41.979000 | 30.010000 | 49.759998 |
| C  | 40.084999 | 28.882999 | 49.316002 |
| C  | 41.102001 | 29.131001 | 50.306000 |
| H  | 38.856998 | 27.590000 | 50.473000 |
| H  | 34.896999 | 28.905001 | 45.630001 |
| H  | 39.835999 | 31.266001 | 42.328999 |
| H  | 43.254002 | 31.325001 | 47.735001 |
| Fe | 39.202000 | 29.785999 | 46.541000 |
| C  | 38.758999 | 31.973000 | 48.765999 |
| C  | 37.942001 | 32.875000 | 49.554001 |
| C  | 36.736000 | 33.526001 | 49.176998 |
| C  | 36.258999 | 33.495998 | 47.838001 |
| C  | 36.001999 | 34.250000 | 50.155998 |
| C  | 35.098999 | 34.182999 | 47.501999 |
| C  | 34.839001 | 34.916000 | 49.811001 |
| C  | 34.390999 | 34.887001 | 48.480999 |
| H  | 39.817001 | 32.023998 | 49.111000 |
| H  | 38.421001 | 31.098000 | 49.452000 |
| H  | 38.270000 | 32.990002 | 50.588001 |
| H  | 36.818001 | 32.929001 | 47.105000 |
| H  | 36.365002 | 34.275002 | 51.180000 |
| H  | 34.747002 | 34.176998 | 46.474998 |
| H  | 34.275002 | 35.466000 | 50.560001 |
| H  | 33.483002 | 35.423000 | 48.214001 |
| O  | 38.574001 | 31.736000 | 47.477001 |

LA1-TS3-trans-si<sup>d</sup>

|    |           |           |           |
|----|-----------|-----------|-----------|
| S  | 39.845001 | 27.722000 | 45.493000 |
| C  | 40.966000 | 26.740000 | 46.573002 |
| H  | 41.692001 | 26.214001 | 45.944000 |
| H  | 41.501999 | 27.405001 | 47.248001 |
| N  | 37.754002 | 28.764000 | 47.537998 |
| N  | 38.036999 | 29.955999 | 44.928001 |
| N  | 40.673000 | 30.740000 | 45.597000 |
| C  | 36.516998 | 27.642000 | 49.132999 |
| N  | 40.409000 | 29.473000 | 48.172001 |
| C  | 35.683998 | 27.916000 | 48.101002 |
| C  | 37.816002 | 28.164000 | 48.778999 |
| C  | 38.943001 | 28.098000 | 49.594002 |
| C  | 36.464001 | 28.596001 | 47.085999 |
| C  | 35.994999 | 28.958000 | 45.830002 |
| C  | 36.740002 | 29.546000 | 44.804001 |
| C  | 36.250000 | 29.743999 | 43.448002 |
| C  | 37.307999 | 30.292999 | 42.775002 |
| C  | 38.412998 | 30.424000 | 43.691002 |
| C  | 39.660000 | 30.959000 | 43.381001 |
| C  | 40.710999 | 31.135000 | 44.279999 |
| C  | 41.977001 | 31.778999 | 43.952999 |
| C  | 42.676998 | 31.746000 | 45.132000 |
| C  | 41.875000 | 31.111000 | 46.141998 |
| C  | 42.266998 | 30.909000 | 47.466999 |
| C  | 41.580002 | 30.160000 | 48.414001 |
| C  | 41.993000 | 29.954000 | 49.789001 |
| C  | 40.115002 | 28.798000 | 49.342999 |
| C  | 41.131001 | 29.066000 | 50.337002 |
| H  | 38.883999 | 27.525999 | 50.512001 |
| H  | 34.962002 | 28.709999 | 45.606998 |
| H  | 39.820999 | 31.284000 | 42.359001 |
| H  | 43.228001 | 31.309999 | 47.768002 |
| Fe | 39.223999 | 29.690001 | 46.556999 |
| C  | 38.908001 | 31.865999 | 48.550999 |
| C  | 38.383999 | 33.058998 | 49.167999 |
| C  | 37.473000 | 34.007000 | 48.606998 |
| C  | 36.632000 | 33.659000 | 47.516998 |
| C  | 37.333000 | 35.282001 | 49.212002 |
| C  | 35.660000 | 34.551998 | 47.081001 |
| C  | 36.375999 | 36.172001 | 48.751999 |
| C  | 35.530998 | 35.799999 | 47.698002 |
| H  | 39.890999 | 32.539001 | 48.537998 |
| H  | 39.224998 | 31.110001 | 49.287998 |
| H  | 38.821999 | 33.294998 | 50.138000 |
| H  | 36.747002 | 32.686001 | 47.053001 |
| H  | 37.987000 | 35.560001 | 50.034000 |
| H  | 35.006001 | 34.286999 | 46.256001 |
| H  | 36.282001 | 37.155998 | 49.203999 |
| H  | 34.763000 | 36.490002 | 47.361000 |
| O  | 38.563000 | 31.452999 | 47.348000 |

LA1-TS3-trans-si<sup>a</sup>

|    |           |           |           |
|----|-----------|-----------|-----------|
| S  | 39.789001 | 27.563999 | 45.417999 |
| C  | 40.949001 | 26.648001 | 46.516998 |
| H  | 41.688000 | 26.094999 | 45.929001 |
| H  | 41.472000 | 27.354000 | 47.162998 |
| N  | 37.693001 | 28.906000 | 47.558998 |
| N  | 37.997002 | 30.052000 | 44.952000 |
| N  | 40.665001 | 30.780001 | 45.591999 |
| C  | 36.473000 | 27.747999 | 49.144001 |
| N  | 40.374001 | 29.556000 | 48.160999 |
| C  | 35.619999 | 28.077999 | 48.141998 |
| C  | 37.772999 | 28.261000 | 48.778999 |
| C  | 38.910000 | 28.158001 | 49.570999 |
| C  | 36.390999 | 28.768000 | 47.130001 |
| C  | 35.917999 | 29.143000 | 45.880001 |
| C  | 36.682999 | 29.676001 | 44.841000 |
| C  | 36.209000 | 29.837999 | 43.480000 |
| C  | 37.289001 | 30.323999 | 42.787998 |
| C  | 38.393002 | 30.464001 | 43.698002 |
| C  | 39.650002 | 30.965000 | 43.373001 |
| C  | 40.702999 | 31.150000 | 44.266998 |
| C  | 41.976002 | 31.773001 | 43.929001 |
| C  | 42.679001 | 31.749001 | 45.105999 |
| C  | 41.875000 | 31.139999 | 46.129002 |
| C  | 42.266998 | 30.948000 | 47.452999 |
| C  | 41.561001 | 30.226999 | 48.402000 |
| C  | 41.970001 | 30.003000 | 49.770000 |
| C  | 40.081001 | 28.865000 | 49.324001 |
| C  | 41.101002 | 29.114000 | 50.313000 |
| H  | 38.862999 | 27.558001 | 50.473000 |
| H  | 34.877998 | 28.922001 | 45.665001 |
| H  | 39.817001 | 31.256001 | 42.341999 |
| H  | 43.235001 | 31.333000 | 47.750000 |
| Fe | 39.189999 | 29.778000 | 46.554001 |
| C  | 38.685001 | 32.011002 | 48.768002 |
| C  | 37.784000 | 32.841999 | 49.547001 |
| C  | 36.686001 | 33.623001 | 49.092999 |
| C  | 36.250999 | 33.582001 | 47.741001 |
| C  | 35.965000 | 34.412998 | 50.028999 |
| C  | 35.138000 | 34.317001 | 47.351002 |
| C  | 34.841999 | 35.118999 | 49.632000 |
| C  | 34.433998 | 35.077000 | 48.290001 |
| H  | 39.520000 | 32.793999 | 49.000999 |
| H  | 39.064999 | 31.181999 | 49.401001 |
| H  | 38.060001 | 32.932999 | 50.598000 |
| H  | 36.807999 | 32.974998 | 47.037998 |
| H  | 36.296001 | 34.448002 | 51.063000 |
| H  | 34.818001 | 34.301998 | 46.313999 |
| H  | 34.279999 | 35.710999 | 50.348999 |
| H  | 33.561001 | 35.647999 | 47.980999 |
| O  | 38.549000 | 31.761000 | 47.480000 |

LA1-3<sup>d</sup>

|    |           |           |           |
|----|-----------|-----------|-----------|
| S  | 39.813000 | 27.684999 | 45.473000 |
| C  | 40.935001 | 26.742001 | 46.578999 |
| H  | 41.671001 | 26.219000 | 45.960999 |
| H  | 41.458000 | 27.420000 | 47.251999 |
| N  | 37.692001 | 28.813000 | 47.462002 |
| N  | 38.035999 | 29.889000 | 44.827999 |
| N  | 40.648998 | 30.702999 | 45.540001 |
| C  | 36.445999 | 27.669001 | 49.042000 |
| N  | 40.323002 | 29.528999 | 48.136002 |
| C  | 35.630001 | 27.912001 | 47.984001 |
| C  | 37.738998 | 28.216000 | 48.715000 |
| C  | 38.848999 | 28.166000 | 49.550999 |
| C  | 36.415001 | 28.591999 | 46.979000 |
| C  | 35.973999 | 28.909000 | 45.702000 |
| C  | 36.738998 | 29.476999 | 44.681999 |
| C  | 36.276001 | 29.658001 | 43.314999 |
| C  | 37.347000 | 30.200001 | 42.655998 |
| C  | 38.433998 | 30.343000 | 43.590000 |
| C  | 39.681999 | 30.881001 | 43.297001 |
| C  | 40.712002 | 31.077000 | 44.213001 |
| C  | 41.981998 | 31.716000 | 43.898998 |
| C  | 42.666000 | 31.691999 | 45.087002 |
| C  | 41.849998 | 31.076000 | 46.095001 |
| C  | 42.226002 | 30.896999 | 47.425999 |
| C  | 41.507999 | 30.197001 | 48.380001 |
| C  | 41.912998 | 29.995001 | 49.756001 |
| C  | 40.022999 | 28.865000 | 49.308998 |
| C  | 41.040001 | 29.120001 | 50.305000 |
| H  | 38.778999 | 27.599001 | 50.472000 |
| H  | 34.949001 | 28.643000 | 45.459999 |
| H  | 39.862000 | 31.190001 | 42.273998 |
| H  | 43.188000 | 31.290001 | 47.730000 |
| Fe | 39.209999 | 29.627001 | 46.464001 |
| C  | 38.198002 | 31.888000 | 48.449001 |
| C  | 38.148998 | 33.278999 | 49.026001 |
| C  | 36.730999 | 33.834999 | 48.941002 |
| C  | 36.162998 | 34.091999 | 47.685001 |
| C  | 35.985001 | 34.110001 | 50.094002 |
| C  | 34.874001 | 34.615002 | 47.584000 |
| C  | 34.695999 | 34.637001 | 49.993000 |
| C  | 34.137001 | 34.889000 | 48.738998 |
| H  | 37.820999 | 31.058001 | 49.066002 |
| H  | 38.478001 | 33.235001 | 50.070999 |
| H  | 38.841000 | 33.917999 | 48.466000 |
| H  | 36.735001 | 33.903000 | 46.780998 |
| H  | 36.417999 | 33.923000 | 51.073002 |
| H  | 34.453999 | 34.812000 | 46.602001 |
| H  | 34.127998 | 34.863998 | 50.891998 |
| H  | 33.133999 | 35.305000 | 48.665001 |
| O  | 38.622002 | 31.656000 | 47.321999 |

LA1-3<sup>a</sup>

|    |           |           |           |
|----|-----------|-----------|-----------|
| S  | 39.868000 | 27.517000 | 45.381001 |
| C  | 40.995998 | 26.613001 | 46.516998 |
| H  | 41.736000 | 26.048000 | 45.943001 |
| H  | 41.514999 | 27.320999 | 47.162998 |
| N  | 37.693001 | 28.856001 | 47.507000 |
| N  | 38.016998 | 29.966000 | 44.905998 |
| N  | 40.645000 | 30.754000 | 45.582001 |
| C  | 36.455002 | 27.725000 | 49.102001 |
| N  | 40.334000 | 29.546000 | 48.138000 |
| C  | 35.612999 | 28.033001 | 48.083000 |
| C  | 37.756001 | 28.232000 | 48.743000 |
| C  | 38.882000 | 28.142000 | 49.550999 |
| C  | 36.390999 | 28.702000 | 47.067001 |
| C  | 35.930000 | 29.049000 | 45.806999 |
| C  | 36.702000 | 29.587000 | 44.778000 |
| C  | 36.235001 | 29.766001 | 43.418999 |
| C  | 37.313000 | 30.275000 | 42.741001 |
| C  | 38.410999 | 30.407000 | 43.657001 |
| C  | 39.660000 | 30.931999 | 43.347000 |
| C  | 40.695999 | 31.129000 | 44.252998 |
| C  | 41.964001 | 31.761999 | 43.928001 |
| C  | 42.660000 | 31.738001 | 45.110001 |
| C  | 41.853001 | 31.124001 | 46.123001 |
| C  | 42.237999 | 30.934999 | 47.448002 |
| C  | 41.520000 | 30.223000 | 48.389999 |
| C  | 41.923000 | 30.004999 | 49.757999 |
| C  | 40.043999 | 28.858000 | 49.306000 |
| C  | 41.056999 | 29.112000 | 50.297001 |
| H  | 38.828999 | 27.552000 | 50.458000 |
| H  | 34.893002 | 28.823000 | 45.584000 |
| H  | 39.831001 | 31.233999 | 42.320000 |
| H  | 43.202000 | 31.323999 | 47.752998 |
| Fe | 39.228001 | 29.608999 | 46.473999 |
| C  | 38.206001 | 32.301998 | 48.813999 |
| C  | 38.095001 | 33.730000 | 49.303001 |
| C  | 36.652000 | 34.196999 | 49.150002 |
| C  | 36.106998 | 34.360001 | 47.867001 |
| C  | 35.845001 | 34.458000 | 50.264000 |
| C  | 34.786999 | 34.775002 | 47.702999 |
| C  | 34.523998 | 34.880001 | 50.102001 |
| C  | 33.991001 | 35.037998 | 48.820999 |
| H  | 37.911999 | 31.506001 | 49.519001 |
| H  | 38.407001 | 33.778999 | 50.352001 |
| H  | 38.763000 | 34.360001 | 48.703999 |
| H  | 36.723000 | 34.171001 | 46.991001 |
| H  | 36.257000 | 34.341999 | 51.263000 |
| H  | 34.387001 | 34.897999 | 46.700001 |
| H  | 33.910999 | 35.097000 | 50.973000 |
| H  | 32.963001 | 35.372002 | 48.699001 |
| O  | 38.558998 | 32.009998 | 47.683998 |

**Table S14:** Cartesian coordinates (xyz, in Å) of the QM atoms of all QM/MM optimized stationary points reported in **Figures S15** and **S18**, and **Table S6**.

LA1-1<sup>d</sup>

|    |           |           |           |
|----|-----------|-----------|-----------|
| S  | 37.410000 | 28.740999 | 45.063999 |
| C  | 38.047001 | 27.455999 | 46.196999 |
| H  | 38.554001 | 26.677999 | 45.615002 |
| H  | 38.762001 | 27.886999 | 46.896999 |
| N  | 35.740002 | 30.410999 | 47.035999 |
| N  | 36.544998 | 31.473000 | 44.495998 |
| N  | 39.296001 | 31.382000 | 45.328999 |
| C  | 34.129002 | 29.643000 | 48.520000 |
| N  | 38.469002 | 30.287001 | 47.831001 |
| C  | 33.477001 | 30.187000 | 47.459999 |
| C  | 35.542999 | 29.823999 | 48.269001 |
| C  | 36.557999 | 29.483000 | 49.153000 |
| C  | 34.484001 | 30.658001 | 46.523998 |
| C  | 34.244999 | 31.216000 | 45.271999 |
| C  | 35.192001 | 31.514999 | 44.282001 |
| C  | 34.890999 | 31.895000 | 42.907001 |
| C  | 36.118000 | 32.074001 | 42.327000 |
| C  | 37.136002 | 31.829000 | 43.310001 |
| C  | 38.511002 | 31.978001 | 43.099998 |
| C  | 39.521000 | 31.809999 | 44.042999 |
| C  | 40.939999 | 32.053001 | 43.799000 |
| C  | 41.539001 | 31.740000 | 44.991001 |
| C  | 40.519001 | 31.341000 | 45.923000 |
| C  | 40.754002 | 30.964001 | 47.251999 |
| C  | 39.805000 | 30.500999 | 48.137001 |
| C  | 40.067001 | 30.108999 | 49.501999 |
| C  | 37.916000 | 29.750999 | 48.964001 |
| C  | 38.919998 | 29.589001 | 49.987999 |
| H  | 36.269001 | 29.033001 | 50.094002 |
| H  | 33.208000 | 31.410000 | 45.018002 |
| H  | 38.814999 | 32.283001 | 42.104000 |
| H  | 41.778000 | 31.004000 | 47.606998 |
| Fe | 37.493999 | 31.000999 | 46.227001 |
| C  | 35.056999 | 36.337002 | 46.481998 |
| C  | 34.415001 | 37.011002 | 47.443001 |
| C  | 34.919998 | 38.178001 | 48.181000 |
| C  | 36.291000 | 38.462002 | 48.297001 |
| C  | 34.005001 | 39.055000 | 48.789001 |
| C  | 36.726002 | 39.595001 | 48.979000 |
| C  | 34.438000 | 40.182999 | 49.484001 |
| C  | 35.804001 | 40.457001 | 49.583000 |
| H  | 36.056999 | 36.601002 | 46.148998 |
| H  | 34.594002 | 35.490002 | 45.986000 |
| H  | 33.403000 | 36.710999 | 47.714001 |
| H  | 37.020000 | 37.792000 | 47.849998 |
| H  | 32.939999 | 38.855999 | 48.688999 |
| H  | 37.791000 | 39.804001 | 49.025002 |
| H  | 33.719002 | 40.859001 | 49.938999 |
| H  | 36.134998 | 41.341000 | 50.120998 |
| O  | 37.373001 | 32.484001 | 46.884998 |

LA1-1<sup>a</sup>

|    |           |           |           |
|----|-----------|-----------|-----------|
| S  | 37.410999 | 28.746000 | 45.069000 |
| C  | 38.049000 | 27.457001 | 46.196999 |
| H  | 38.553001 | 26.679001 | 45.612000 |
| H  | 38.766998 | 27.884001 | 46.896999 |
| N  | 35.744999 | 30.413000 | 47.049999 |
| N  | 36.542999 | 31.473000 | 44.507999 |
| N  | 39.298000 | 31.374001 | 45.331001 |
| C  | 34.137001 | 29.643999 | 48.535999 |
| N  | 38.474998 | 30.281000 | 47.837002 |
| C  | 33.483002 | 30.194000 | 47.480999 |
| C  | 35.550999 | 29.820999 | 48.280998 |
| C  | 36.567001 | 29.476000 | 49.161999 |
| C  | 34.487999 | 30.665001 | 46.542999 |
| C  | 34.245998 | 31.228001 | 45.293999 |
| C  | 35.189999 | 31.524000 | 44.299999 |
| C  | 34.884998 | 31.905001 | 42.925999 |
| C  | 36.111000 | 32.076000 | 42.341000 |
| C  | 37.131001 | 31.825001 | 43.320000 |
| C  | 38.507000 | 31.969000 | 43.105000 |
| C  | 39.520000 | 31.802000 | 44.043999 |
| C  | 40.938000 | 32.048000 | 43.798000 |
| C  | 41.539001 | 31.736000 | 44.988998 |
| C  | 40.521000 | 31.334999 | 45.923000 |
| C  | 40.758999 | 30.957001 | 47.251999 |
| C  | 39.812000 | 30.496000 | 48.139999 |
| C  | 40.077000 | 30.107000 | 49.505001 |
| C  | 37.924999 | 29.745001 | 48.970001 |
| C  | 38.931000 | 29.586000 | 49.993000 |
| H  | 36.279999 | 29.023001 | 50.102001 |
| H  | 33.209000 | 31.427999 | 45.046001 |
| H  | 38.807999 | 32.271999 | 42.106998 |
| H  | 41.784000 | 30.996000 | 47.604000 |
| Fe | 37.493999 | 30.990999 | 46.235001 |
| C  | 35.044998 | 36.342999 | 46.474998 |
| C  | 34.403000 | 37.015999 | 47.437000 |
| C  | 34.910000 | 38.181000 | 48.178001 |
| C  | 36.282001 | 38.459999 | 48.297001 |
| C  | 33.995998 | 39.058998 | 48.785000 |
| C  | 36.717999 | 39.591000 | 48.980999 |
| C  | 34.431000 | 40.185001 | 49.483002 |
| C  | 35.797001 | 40.455002 | 49.584999 |
| H  | 36.047001 | 36.605999 | 46.145000 |
| H  | 34.581001 | 35.499001 | 45.974998 |
| H  | 33.389999 | 36.717999 | 47.703999 |
| H  | 37.008999 | 37.789001 | 47.851002 |
| H  | 32.930000 | 38.863998 | 48.682999 |
| H  | 37.784000 | 39.797001 | 49.029999 |
| H  | 33.713001 | 40.862000 | 49.937000 |
| H  | 36.130001 | 41.337002 | 50.124001 |
| O  | 37.394001 | 32.479000 | 46.887001 |

LA1-TS1<sup>d</sup>

|    |           |           |           |
|----|-----------|-----------|-----------|
| S  | 37.463001 | 28.834999 | 45.062000 |
| C  | 38.091000 | 27.542000 | 46.195999 |
| H  | 38.601002 | 26.767000 | 45.612999 |
| H  | 38.804001 | 27.966999 | 46.902000 |
| N  | 35.708000 | 30.455999 | 47.105000 |
| N  | 36.499001 | 31.542000 | 44.551998 |
| N  | 39.250000 | 31.466999 | 45.374001 |
| C  | 34.097000 | 29.649000 | 48.570000 |
| N  | 38.422001 | 30.339001 | 47.881001 |
| C  | 33.445000 | 30.201000 | 47.513000 |
| C  | 35.509998 | 29.834999 | 48.323002 |
| C  | 36.530998 | 29.482000 | 49.201000 |
| C  | 34.452000 | 30.690001 | 46.587002 |
| C  | 34.208000 | 31.263000 | 45.339001 |
| C  | 35.145000 | 31.597000 | 44.353001 |
| C  | 34.833000 | 32.043999 | 42.999001 |
| C  | 36.056000 | 32.249001 | 42.419998 |
| C  | 37.081001 | 31.950001 | 43.382999 |
| C  | 38.453999 | 32.098000 | 43.165001 |
| C  | 39.471001 | 31.905001 | 44.095001 |
| C  | 40.891998 | 32.127998 | 43.838001 |
| C  | 41.495998 | 31.795000 | 45.021000 |
| C  | 40.476002 | 31.402000 | 45.959000 |
| C  | 40.709999 | 31.007000 | 47.279999 |
| C  | 39.762001 | 30.542000 | 48.172001 |
| C  | 40.041000 | 30.132000 | 49.528000 |
| C  | 37.883999 | 29.768999 | 49.011002 |
| C  | 38.900002 | 29.601999 | 50.021000 |
| H  | 36.249001 | 29.004000 | 50.130001 |
| H  | 33.167999 | 31.448999 | 45.091999 |
| H  | 38.750999 | 32.428001 | 42.174999 |
| H  | 41.737000 | 31.027000 | 47.629002 |
| Fe | 37.453999 | 31.030001 | 46.271999 |
| C  | 36.735001 | 33.188999 | 48.660000 |
| C  | 35.880001 | 34.244999 | 48.436001 |
| C  | 36.195000 | 35.658001 | 48.523998 |
| C  | 37.442001 | 36.146999 | 48.984001 |
| C  | 35.202000 | 36.606998 | 48.182999 |
| C  | 37.669998 | 37.513000 | 49.101002 |
| C  | 35.435001 | 37.972000 | 48.304001 |
| C  | 36.671001 | 38.433998 | 48.765999 |
| H  | 37.730999 | 33.345001 | 49.057999 |
| H  | 36.312000 | 32.210999 | 48.824001 |
| H  | 34.861000 | 34.015999 | 48.125999 |
| H  | 38.230000 | 35.453999 | 49.258999 |
| H  | 34.237000 | 36.255001 | 47.826000 |
| H  | 38.624001 | 37.874001 | 49.473999 |
| H  | 34.653999 | 38.681999 | 48.041000 |
| H  | 36.855999 | 39.500000 | 48.866001 |
| O  | 37.382000 | 32.637001 | 46.846001 |

LA1-TS1<sup>a</sup>

|    |           |           |           |
|----|-----------|-----------|-----------|
| S  | 37.415001 | 28.857000 | 45.152000 |
| C  | 38.050999 | 27.545000 | 46.251999 |
| H  | 38.567001 | 26.794001 | 45.643002 |
| H  | 38.757999 | 27.958000 | 46.970001 |
| N  | 35.724998 | 30.468000 | 47.094002 |
| N  | 36.537998 | 31.549000 | 44.554001 |
| N  | 39.271000 | 31.483000 | 45.380001 |
| C  | 34.125999 | 29.648001 | 48.556000 |
| N  | 38.469002 | 30.322001 | 47.859001 |
| C  | 33.470001 | 30.204000 | 47.501999 |
| C  | 35.537998 | 29.839001 | 48.306999 |
| C  | 36.561001 | 29.485001 | 49.182999 |
| C  | 34.473000 | 30.702000 | 46.577999 |
| C  | 34.230999 | 31.273001 | 45.328999 |
| C  | 35.175999 | 31.601999 | 44.355999 |
| C  | 34.869999 | 32.044998 | 43.000000 |
| C  | 36.091999 | 32.249001 | 42.421001 |
| C  | 37.119999 | 31.955999 | 43.381001 |
| C  | 38.487999 | 32.109001 | 43.159000 |
| C  | 39.493999 | 31.919001 | 44.097000 |
| C  | 40.916000 | 32.141998 | 43.847000 |
| C  | 41.520000 | 31.809999 | 45.028000 |
| C  | 40.507000 | 31.412001 | 45.970001 |
| C  | 40.751999 | 31.009001 | 47.277000 |
| C  | 39.798000 | 30.532000 | 48.162998 |
| C  | 40.066002 | 30.125999 | 49.520000 |
| C  | 37.909000 | 29.764000 | 48.991001 |
| C  | 38.918999 | 29.598000 | 50.006001 |
| H  | 36.277000 | 29.009001 | 50.112000 |
| H  | 33.193001 | 31.455999 | 45.074001 |
| H  | 38.786999 | 32.437000 | 42.169998 |
| H  | 41.778999 | 31.025000 | 47.624001 |
| Fe | 37.504002 | 31.041000 | 46.245998 |
| C  | 36.557999 | 33.175999 | 48.639999 |
| C  | 35.784000 | 34.279999 | 48.340000 |
| C  | 36.167999 | 35.668999 | 48.472000 |
| C  | 37.415001 | 36.085999 | 49.001999 |
| C  | 35.243999 | 36.674000 | 48.096001 |
| C  | 37.709999 | 37.436001 | 49.145000 |
| C  | 35.543999 | 38.021999 | 48.247002 |
| C  | 36.779999 | 38.411999 | 48.770000 |
| H  | 37.514999 | 33.278999 | 49.139000 |
| H  | 36.071999 | 32.221001 | 48.751999 |
| H  | 34.787998 | 34.105999 | 47.938000 |
| H  | 38.152000 | 35.348999 | 49.304001 |
| H  | 34.282001 | 36.377998 | 47.686001 |
| H  | 38.664001 | 37.738998 | 49.566002 |
| H  | 34.813999 | 38.775002 | 47.958000 |
| H  | 37.018002 | 39.466999 | 48.884998 |
| O  | 37.407001 | 32.589001 | 46.931000 |

LA1-Int1<sup>d</sup>

|    |           |           |           |
|----|-----------|-----------|-----------|
| S  | 37.481426 | 28.859138 | 45.092632 |
| C  | 38.096478 | 27.555204 | 46.222675 |
| H  | 38.611534 | 26.789221 | 45.632706 |
| H  | 38.805431 | 27.973267 | 46.937679 |
| N  | 35.679283 | 30.425083 | 47.108547 |
| N  | 36.464275 | 31.534065 | 44.542538 |
| N  | 39.198261 | 31.477249 | 45.361603 |
| C  | 34.074295 | 29.628021 | 48.580532 |
| N  | 38.388268 | 30.344263 | 47.884617 |
| C  | 33.419292 | 30.167957 | 47.517502 |
| C  | 35.486290 | 29.816101 | 48.330559 |
| C  | 36.510292 | 29.468185 | 49.210594 |
| C  | 34.423279 | 30.649992 | 46.585514 |
| C  | 34.177277 | 31.210949 | 45.331493 |
| C  | 35.110279 | 31.559978 | 44.345505 |
| C  | 34.786289 | 32.003922 | 42.991486 |
| C  | 36.004284 | 32.236988 | 42.411510 |
| C  | 37.036282 | 31.955070 | 43.372540 |
| C  | 38.406277 | 32.125145 | 43.154572 |
| C  | 39.421265 | 31.927231 | 44.085598 |
| C  | 40.842258 | 32.154312 | 43.832626 |
| C  | 41.446251 | 31.810373 | 45.011650 |
| C  | 40.427250 | 31.408339 | 45.947636 |
| C  | 40.669247 | 31.010386 | 47.264648 |
| C  | 39.726254 | 30.546350 | 48.165638 |
| C  | 40.016243 | 30.138403 | 49.520657 |
| C  | 37.857277 | 29.766260 | 49.018616 |
| C  | 38.880264 | 29.605349 | 50.021645 |
| H  | 36.232300 | 28.988192 | 50.138596 |
| H  | 33.135277 | 31.378878 | 45.080463 |
| H  | 38.701279 | 32.465141 | 42.167568 |
| H  | 41.698235 | 31.026457 | 47.605671 |
| Fe | 37.417274 | 30.951164 | 46.232578 |
| C  | 36.968102 | 33.008190 | 48.257511 |
| C  | 36.010036 | 34.145126 | 48.158463 |
| C  | 36.242947 | 35.509148 | 48.447433 |
| C  | 37.454903 | 35.988235 | 49.034451 |
| C  | 35.230900 | 36.471077 | 48.145382 |
| C  | 37.630817 | 37.340256 | 49.286419 |
| C  | 35.417809 | 37.817097 | 48.409355 |
| C  | 36.620770 | 38.262184 | 48.976376 |
| H  | 37.878075 | 33.262257 | 48.819527 |
| H  | 36.486137 | 32.172173 | 48.775524 |
| H  | 35.060062 | 33.900059 | 47.685444 |
| H  | 38.250942 | 35.293293 | 49.272488 |
| H  | 34.302929 | 36.129013 | 47.694370 |
| H  | 38.556786 | 37.693321 | 49.729431 |
| H  | 34.634773 | 38.533047 | 48.169319 |
| H  | 36.771706 | 39.321201 | 49.166351 |
| O  | 37.266151 | 32.701172 | 46.909527 |

LA1-Int1<sup>a</sup>

|    |           |           |           |
|----|-----------|-----------|-----------|
| S  | 37.448002 | 28.834000 | 45.123001 |
| C  | 38.076000 | 27.545000 | 46.256001 |
| H  | 38.608002 | 26.791000 | 45.666000 |
| H  | 38.770000 | 27.974001 | 46.978001 |
| N  | 35.619999 | 30.422001 | 47.046001 |
| N  | 36.452999 | 31.454000 | 44.490002 |
| N  | 39.179001 | 31.448999 | 45.362000 |
| C  | 34.009998 | 29.622000 | 48.498001 |
| N  | 38.334999 | 30.320999 | 47.842999 |
| C  | 33.366001 | 30.136999 | 47.415001 |
| C  | 35.421001 | 29.825001 | 48.276001 |
| C  | 36.424000 | 29.495001 | 49.178001 |
| C  | 34.374001 | 30.620001 | 46.492001 |
| C  | 34.136002 | 31.142000 | 45.223999 |
| C  | 35.095001 | 31.481001 | 44.269001 |
| C  | 34.807999 | 31.924999 | 42.911999 |
| C  | 36.036999 | 32.167000 | 42.359001 |
| C  | 37.054001 | 31.889999 | 43.332001 |
| C  | 38.417000 | 32.077000 | 43.129002 |
| C  | 39.409000 | 31.889999 | 44.082001 |
| C  | 40.831001 | 32.120998 | 43.848999 |
| C  | 41.426998 | 31.784000 | 45.035000 |
| C  | 40.408001 | 31.382000 | 45.966000 |
| C  | 40.641998 | 30.987000 | 47.273998 |
| C  | 39.674999 | 30.521000 | 48.144001 |
| C  | 39.931999 | 30.111000 | 49.497002 |
| C  | 37.768002 | 29.766001 | 48.983002 |
| C  | 38.780998 | 29.593000 | 49.987000 |
| H  | 36.131001 | 29.045000 | 50.115002 |
| H  | 33.098999 | 31.294001 | 44.945999 |
| H  | 38.724998 | 32.422001 | 42.148998 |
| H  | 41.664001 | 31.004000 | 47.636002 |
| Fe | 37.383999 | 30.944000 | 46.215000 |
| C  | 36.803001 | 33.023998 | 48.188999 |
| C  | 35.924999 | 34.220001 | 48.032001 |
| C  | 36.228001 | 35.563999 | 48.355999 |
| C  | 37.443001 | 35.973000 | 48.987000 |
| C  | 35.276001 | 36.583000 | 48.047001 |
| C  | 37.678001 | 37.310001 | 49.271000 |
| C  | 35.521000 | 37.911999 | 48.346001 |
| C  | 36.727001 | 38.289001 | 48.952000 |
| H  | 37.700001 | 33.224998 | 48.785999 |
| H  | 36.250000 | 32.216999 | 48.678001 |
| H  | 34.980000 | 34.035999 | 47.525002 |
| H  | 38.198002 | 35.237000 | 49.238998 |
| H  | 34.344002 | 36.298000 | 47.563999 |
| H  | 38.608002 | 37.605000 | 49.749001 |
| H  | 34.778000 | 38.667999 | 48.102001 |
| H  | 36.924999 | 39.335999 | 49.167999 |
| O  | 37.188000 | 32.639000 | 46.868000 |

LA1-TS2<sup>a</sup>

|    |           |           |           |
|----|-----------|-----------|-----------|
| S  | 37.442001 | 28.778000 | 45.063999 |
| C  | 38.082001 | 27.507999 | 46.216999 |
| H  | 38.616001 | 26.737000 | 45.650002 |
| H  | 38.772999 | 27.957001 | 46.930000 |
| N  | 35.606998 | 30.410000 | 47.061001 |
| N  | 36.426998 | 31.497000 | 44.515999 |
| N  | 39.154999 | 31.490000 | 45.373001 |
| C  | 34.005001 | 29.605000 | 48.521000 |
| N  | 38.328999 | 30.327999 | 47.847000 |
| C  | 33.354000 | 30.132999 | 47.449001 |
| C  | 35.416000 | 29.802999 | 48.285000 |
| C  | 36.429001 | 29.465000 | 49.175999 |
| C  | 34.356998 | 30.621000 | 46.520000 |
| C  | 34.113998 | 31.160000 | 45.261002 |
| C  | 35.068001 | 31.514000 | 44.303001 |
| C  | 34.769001 | 31.959999 | 42.948002 |
| C  | 35.993999 | 32.210999 | 42.388000 |
| C  | 37.018002 | 31.938000 | 43.355999 |
| C  | 38.381001 | 32.126999 | 43.146999 |
| C  | 39.379002 | 31.936001 | 44.092999 |
| C  | 40.799999 | 32.162998 | 43.853001 |
| C  | 41.402000 | 31.820000 | 45.034000 |
| C  | 40.388000 | 31.416000 | 45.970001 |
| C  | 40.629002 | 31.013000 | 47.275002 |
| C  | 39.667999 | 30.535000 | 48.146999 |
| C  | 39.931000 | 30.120001 | 49.497002 |
| C  | 37.770000 | 29.753000 | 48.981998 |
| C  | 38.785999 | 29.587999 | 49.986000 |
| H  | 36.144001 | 28.996000 | 50.108002 |
| H  | 33.076000 | 31.311001 | 44.987999 |
| H  | 38.682999 | 32.474998 | 42.166000 |
| H  | 41.653000 | 31.028999 | 47.631001 |
| Fe | 37.375000 | 30.937000 | 46.212002 |
| C  | 36.848999 | 32.967999 | 48.320000 |
| C  | 35.999001 | 34.167999 | 48.143002 |
| C  | 36.346001 | 35.523998 | 48.375000 |
| C  | 37.555000 | 35.918999 | 49.019001 |
| C  | 35.431000 | 36.546001 | 47.987999 |
| C  | 37.820000 | 37.258999 | 49.256001 |
| C  | 35.705002 | 37.880001 | 48.238998 |
| C  | 36.903999 | 38.245998 | 48.866001 |
| H  | 37.766998 | 33.145000 | 48.893002 |
| H  | 36.296001 | 32.151001 | 48.792000 |
| H  | 35.041000 | 33.980000 | 47.662998 |
| H  | 38.277000 | 35.168999 | 49.323002 |
| H  | 34.507999 | 36.264000 | 47.490002 |
| H  | 38.740002 | 37.549999 | 49.752998 |
| H  | 34.992001 | 38.646000 | 47.943001 |
| H  | 37.124001 | 39.294998 | 49.044998 |
| O  | 37.119999 | 32.715000 | 46.951000 |

LA1-2-R<sup>d</sup>

|    |           |           |           |
|----|-----------|-----------|-----------|
| S  | 37.526001 | 28.874001 | 45.118000 |
| C  | 38.096001 | 27.551001 | 46.247002 |
| H  | 38.589001 | 26.780001 | 45.644001 |
| H  | 38.818001 | 27.945000 | 46.960999 |
| N  | 35.792000 | 30.514000 | 47.167999 |
| N  | 36.560001 | 31.570000 | 44.611000 |
| N  | 39.282001 | 31.476999 | 45.408001 |
| C  | 34.193001 | 29.704000 | 48.643002 |
| N  | 38.505001 | 30.316000 | 47.898998 |
| C  | 33.534000 | 30.249001 | 47.584000 |
| C  | 35.602001 | 29.889000 | 48.390999 |
| C  | 36.617001 | 29.506001 | 49.257999 |
| C  | 34.528999 | 30.725000 | 46.645000 |
| C  | 34.264000 | 31.257000 | 45.387001 |
| C  | 35.200001 | 31.590000 | 44.408001 |
| C  | 34.879002 | 32.007000 | 43.046001 |
| C  | 36.094002 | 32.227001 | 42.459999 |
| C  | 37.130001 | 31.964001 | 43.421001 |
| C  | 38.493000 | 32.122002 | 43.187000 |
| C  | 39.505001 | 31.912001 | 44.118000 |
| C  | 40.924000 | 32.125000 | 43.859001 |
| C  | 41.535000 | 31.775999 | 45.033001 |
| C  | 40.528999 | 31.379999 | 45.980999 |
| C  | 40.791000 | 30.966999 | 47.280998 |
| C  | 39.847000 | 30.502001 | 48.178001 |
| C  | 40.130001 | 30.104000 | 49.536999 |
| C  | 37.964001 | 29.757000 | 49.043999 |
| C  | 38.988998 | 29.587000 | 50.042999 |
| H  | 36.334999 | 29.027000 | 50.186001 |
| H  | 33.220001 | 31.410999 | 45.133999 |
| H  | 38.786999 | 32.451000 | 42.196999 |
| H  | 41.824001 | 30.966000 | 47.610001 |
| Fe | 37.533001 | 30.839001 | 46.234001 |
| C  | 37.709000 | 33.244999 | 48.868000 |
| C  | 36.398998 | 33.629002 | 48.319000 |
| C  | 35.993999 | 35.055000 | 48.153999 |
| C  | 36.933998 | 36.069000 | 47.917000 |
| C  | 34.645000 | 35.403000 | 48.306999 |
| C  | 36.534000 | 37.401001 | 47.853001 |
| C  | 34.247002 | 36.738998 | 48.257999 |
| C  | 35.189999 | 37.742001 | 48.033001 |
| H  | 38.428001 | 34.022999 | 49.118000 |
| H  | 37.817001 | 32.312000 | 49.409000 |
| H  | 35.578999 | 32.924999 | 48.435001 |
| H  | 37.983002 | 35.827000 | 47.772999 |
| H  | 33.901001 | 34.627998 | 48.472000 |
| H  | 37.276001 | 38.174999 | 47.672001 |
| H  | 33.201000 | 37.000000 | 48.395000 |
| H  | 34.880001 | 38.784000 | 48.000000 |
| O  | 37.452999 | 33.103001 | 47.452999 |



LA1-2-R<sup>a</sup>

|    |           |           |           |
|----|-----------|-----------|-----------|
| S  | 37.487999 | 28.700001 | 44.988998 |
| C  | 38.099998 | 27.445000 | 46.176998 |
| H  | 38.598999 | 26.632999 | 45.638000 |
| H  | 38.813999 | 27.895000 | 46.868000 |
| N  | 35.778000 | 30.590000 | 47.124001 |
| N  | 36.556000 | 31.645000 | 44.591000 |
| N  | 39.282001 | 31.521999 | 45.370998 |
| C  | 34.174999 | 29.767000 | 48.591999 |
| N  | 38.488998 | 30.375999 | 47.841999 |
| C  | 33.518002 | 30.358000 | 47.556999 |
| C  | 35.584999 | 29.940001 | 48.334000 |
| C  | 36.597000 | 29.542000 | 49.192001 |
| C  | 34.514999 | 30.844000 | 46.625000 |
| C  | 34.249001 | 31.406000 | 45.382999 |
| C  | 35.189999 | 31.716000 | 44.401001 |
| C  | 34.876999 | 32.152000 | 43.049999 |
| C  | 36.095001 | 32.333000 | 42.451000 |
| C  | 37.131001 | 32.035999 | 43.396000 |
| C  | 38.493000 | 32.174000 | 43.152000 |
| C  | 39.502998 | 31.962000 | 44.082001 |
| C  | 40.921001 | 32.171001 | 43.821999 |
| C  | 41.534000 | 31.822001 | 44.997002 |
| C  | 40.529999 | 31.429001 | 45.945000 |
| C  | 40.789001 | 31.018999 | 47.244999 |
| C  | 39.834999 | 30.562000 | 48.132999 |
| C  | 40.105000 | 30.156000 | 49.487000 |
| C  | 37.941002 | 29.809999 | 48.984001 |
| C  | 38.958000 | 29.632999 | 49.983002 |
| H  | 36.317001 | 29.048000 | 50.112999 |
| H  | 33.209000 | 31.594999 | 45.141998 |
| H  | 38.785000 | 32.501999 | 42.160999 |
| H  | 41.820000 | 31.011999 | 47.577999 |
| Fe | 37.526001 | 30.823999 | 46.152000 |
| C  | 38.166000 | 33.578999 | 49.432999 |
| C  | 36.860001 | 34.171001 | 49.090000 |
| C  | 36.654999 | 35.645000 | 48.986000 |
| C  | 37.640999 | 36.491001 | 48.457001 |
| C  | 35.458000 | 36.206001 | 49.449001 |
| C  | 37.439999 | 37.869999 | 48.417000 |
| C  | 35.261002 | 37.587002 | 49.418999 |
| C  | 36.255001 | 38.423000 | 48.909000 |
| H  | 39.014999 | 34.241001 | 49.592999 |
| H  | 38.212002 | 32.618999 | 49.941002 |
| H  | 35.967999 | 33.601002 | 49.339001 |
| H  | 38.561001 | 36.073002 | 48.061001 |
| H  | 34.674000 | 35.562000 | 49.838001 |
| H  | 38.207001 | 38.516998 | 47.999001 |
| H  | 34.331001 | 38.013000 | 49.790001 |
| H  | 36.106998 | 39.500000 | 48.896999 |
| O  | 37.675999 | 33.529999 | 48.082001 |

LA1-Int2<sup>d</sup>

|    |           |           |           |
|----|-----------|-----------|-----------|
| S  | 37.299000 | 28.745001 | 44.976002 |
| C  | 38.063999 | 27.582001 | 46.175999 |
| H  | 38.660000 | 26.841999 | 45.630001 |
| H  | 38.710999 | 28.108999 | 46.874001 |
| N  | 35.174999 | 30.400999 | 46.542999 |
| N  | 36.240002 | 31.375000 | 44.076000 |
| N  | 38.891998 | 31.417000 | 45.234001 |
| C  | 33.441002 | 29.643999 | 47.869999 |
| N  | 37.823002 | 30.357000 | 47.662998 |
| C  | 32.896000 | 30.061001 | 46.695000 |
| C  | 34.868000 | 29.875000 | 47.776001 |
| C  | 35.775002 | 29.615999 | 48.806000 |
| C  | 33.979000 | 30.516001 | 45.847000 |
| C  | 33.868999 | 30.978001 | 44.541000 |
| C  | 34.923000 | 31.351999 | 43.693001 |
| C  | 34.773998 | 31.788000 | 42.305000 |
| C  | 36.049000 | 32.070999 | 41.900002 |
| C  | 36.956001 | 31.823999 | 42.990002 |
| C  | 38.328999 | 32.037998 | 42.939999 |
| C  | 39.237000 | 31.851999 | 43.981998 |
| C  | 40.679001 | 32.070999 | 43.868000 |
| C  | 41.169998 | 31.719000 | 45.096001 |
| C  | 40.067001 | 31.325001 | 45.937000 |
| C  | 40.181999 | 30.903000 | 47.255001 |
| C  | 39.137001 | 30.455000 | 48.056000 |
| C  | 39.285999 | 29.990999 | 49.417000 |
| C  | 37.141998 | 29.841000 | 48.750000 |
| C  | 38.064999 | 29.589001 | 49.839001 |
| H  | 35.373001 | 29.202000 | 49.719002 |
| H  | 32.866001 | 31.073000 | 44.139999 |
| H  | 38.729000 | 32.388000 | 41.994999 |
| H  | 41.174999 | 30.900000 | 47.689999 |
| Fe | 37.025002 | 30.871000 | 45.882000 |
| C  | 35.597000 | 33.293999 | 46.452000 |
| C  | 35.435001 | 34.613998 | 47.053001 |
| C  | 36.286999 | 35.282001 | 47.957001 |
| C  | 37.397999 | 34.634998 | 48.584999 |
| C  | 36.051998 | 36.662998 | 48.230999 |
| C  | 38.227001 | 35.353001 | 49.433998 |
| C  | 36.914001 | 37.372002 | 49.047001 |
| C  | 38.005001 | 36.720001 | 49.645000 |
| H  | 34.743999 | 32.685001 | 46.876999 |
| H  | 35.242001 | 33.390999 | 45.397999 |
| H  | 34.550999 | 35.160000 | 46.719002 |
| H  | 37.570999 | 33.587002 | 48.370998 |
| H  | 35.208000 | 37.160999 | 47.761002 |
| H  | 39.066002 | 34.862000 | 49.917000 |
| H  | 36.757999 | 38.433998 | 49.216000 |
| H  | 38.688000 | 37.292000 | 50.265999 |
| O  | 36.790001 | 32.665001 | 46.585999 |

LA1-Int2<sup>a</sup>

|    |           |           |           |
|----|-----------|-----------|-----------|
| S  | 37.299000 | 28.598000 | 44.873001 |
| C  | 38.007000 | 27.452999 | 46.124001 |
| H  | 38.571999 | 26.653000 | 45.632999 |
| H  | 38.678001 | 27.993000 | 46.792999 |
| N  | 35.228001 | 30.469000 | 46.605000 |
| N  | 36.299000 | 31.431000 | 44.110001 |
| N  | 38.957001 | 31.438999 | 45.223999 |
| C  | 33.493999 | 29.726999 | 47.942001 |
| N  | 37.884998 | 30.368999 | 47.660000 |
| C  | 32.950001 | 30.159000 | 46.771000 |
| C  | 34.922001 | 29.940001 | 47.838001 |
| C  | 35.839001 | 29.655001 | 48.846001 |
| C  | 34.036999 | 30.601999 | 45.918999 |
| C  | 33.924999 | 31.056000 | 44.606998 |
| C  | 34.973000 | 31.399000 | 43.744999 |
| C  | 34.814999 | 31.792000 | 42.348999 |
| C  | 36.085999 | 32.066002 | 41.922001 |
| C  | 37.005001 | 31.849001 | 43.004002 |
| C  | 38.380001 | 32.055000 | 42.931000 |
| C  | 39.297001 | 31.862000 | 43.963001 |
| C  | 40.737999 | 32.058998 | 43.839001 |
| C  | 41.234001 | 31.704000 | 45.068001 |
| C  | 40.136002 | 31.326000 | 45.918999 |
| C  | 40.254002 | 30.899000 | 47.236000 |
| C  | 39.209999 | 30.458000 | 48.037998 |
| C  | 39.362000 | 29.995001 | 49.395000 |
| C  | 37.209000 | 29.856001 | 48.757999 |
| C  | 38.141998 | 29.594000 | 49.827999 |
| H  | 35.449001 | 29.247999 | 49.766998 |
| H  | 32.919998 | 31.153999 | 44.209999 |
| H  | 38.771000 | 32.390999 | 41.978001 |
| H  | 41.249001 | 30.882999 | 47.664001 |
| Fe | 37.091999 | 30.913000 | 45.904999 |
| C  | 35.609001 | 33.522999 | 46.547001 |
| C  | 35.403999 | 34.841999 | 47.139999 |
| C  | 36.275002 | 35.558998 | 47.985001 |
| C  | 37.459000 | 34.965000 | 48.521999 |
| C  | 35.978001 | 36.918999 | 48.298000 |
| C  | 38.294998 | 35.713001 | 49.338001 |
| C  | 36.845001 | 37.660000 | 49.077999 |
| C  | 38.004002 | 37.056000 | 49.596001 |
| H  | 34.742001 | 32.924999 | 46.966000 |
| H  | 35.235001 | 33.627998 | 45.492001 |
| H  | 34.470001 | 35.331001 | 46.860001 |
| H  | 37.669998 | 33.931000 | 48.279999 |
| H  | 35.077000 | 37.373001 | 47.891998 |
| H  | 39.188999 | 35.264999 | 49.758999 |
| H  | 36.639000 | 38.707001 | 49.284000 |
| H  | 38.687000 | 37.648998 | 50.198002 |
| O  | 36.789001 | 32.901001 | 46.654999 |

LA1-TS3-cis-re<sup>d</sup>

|    |           |           |           |
|----|-----------|-----------|-----------|
| S  | 37.238998 | 28.731001 | 44.957001 |
| C  | 37.987000 | 27.563999 | 46.160999 |
| H  | 38.561001 | 26.805000 | 45.617001 |
| H  | 38.653999 | 28.082001 | 46.848000 |
| N  | 35.146999 | 30.398001 | 46.543999 |
| N  | 36.195000 | 31.351000 | 44.068001 |
| N  | 38.856998 | 31.382999 | 45.208000 |
| C  | 33.421001 | 29.677000 | 47.903999 |
| N  | 37.799999 | 30.348000 | 47.651001 |
| C  | 32.872002 | 30.070000 | 46.722000 |
| C  | 34.846001 | 29.900999 | 47.797001 |
| C  | 35.755001 | 29.650000 | 48.823002 |
| C  | 33.952999 | 30.500000 | 45.859001 |
| C  | 33.831001 | 30.927999 | 44.537998 |
| C  | 34.875000 | 31.292000 | 43.681000 |
| C  | 34.723999 | 31.698999 | 42.286999 |
| C  | 35.993999 | 32.005001 | 41.880001 |
| C  | 36.903999 | 31.791000 | 42.973999 |
| C  | 38.277000 | 32.016998 | 42.917999 |
| C  | 39.192001 | 31.826000 | 43.952000 |
| C  | 40.632000 | 32.049000 | 43.833000 |
| C  | 41.131001 | 31.687000 | 45.056999 |
| C  | 40.035999 | 31.287001 | 45.902000 |
| C  | 40.161999 | 30.865999 | 47.222000 |
| C  | 39.123001 | 30.434999 | 48.030998 |
| C  | 39.276001 | 29.983999 | 49.396000 |
| C  | 37.125999 | 29.854000 | 48.749001 |
| C  | 38.055000 | 29.600000 | 49.832001 |
| H  | 35.355999 | 29.261999 | 49.747002 |
| H  | 32.825001 | 31.002001 | 44.138000 |
| H  | 38.671001 | 32.368999 | 41.971001 |
| H  | 41.159000 | 30.860001 | 47.646999 |
| Fe | 36.993999 | 30.832001 | 45.863998 |
| C  | 35.660999 | 33.368999 | 46.379002 |
| C  | 35.455002 | 34.682999 | 46.939999 |
| C  | 36.245998 | 35.348000 | 47.923000 |
| C  | 37.380001 | 34.741001 | 48.532001 |
| C  | 35.943001 | 36.703999 | 48.216000 |
| C  | 38.187000 | 35.486000 | 49.382000 |
| C  | 36.778999 | 37.444000 | 49.036999 |
| C  | 37.903000 | 36.835999 | 49.613998 |
| H  | 34.776001 | 33.123001 | 47.143002 |
| H  | 35.132999 | 33.216000 | 45.422001 |
| H  | 34.563000 | 35.195000 | 46.580002 |
| H  | 37.594002 | 33.700001 | 48.324001 |
| H  | 35.075001 | 37.171001 | 47.756001 |
| H  | 39.050999 | 35.027000 | 49.848999 |
| H  | 36.570999 | 38.493999 | 49.223000 |
| H  | 38.564999 | 37.428001 | 50.240002 |
| O  | 36.764999 | 32.685001 | 46.595001 |

LA1-TS3-cis-re<sup>a</sup>

|    |           |           |           |
|----|-----------|-----------|-----------|
| S  | 37.312000 | 28.577999 | 44.855999 |
| C  | 38.011002 | 27.441000 | 46.119999 |
| H  | 38.575001 | 26.636999 | 45.634998 |
| H  | 38.681999 | 27.983000 | 46.786999 |
| N  | 35.205002 | 30.433001 | 46.587002 |
| N  | 36.264999 | 31.400999 | 44.095001 |
| N  | 38.921001 | 31.427999 | 45.214001 |
| C  | 33.472000 | 29.707001 | 47.935001 |
| N  | 37.855000 | 30.361000 | 47.651001 |
| C  | 32.928001 | 30.122999 | 46.758999 |
| C  | 34.898998 | 29.920000 | 47.830002 |
| C  | 35.813000 | 29.646000 | 48.841999 |
| C  | 34.014999 | 30.556999 | 45.902000 |
| C  | 33.896000 | 30.996000 | 44.584999 |
| C  | 34.939999 | 31.347000 | 43.723000 |
| C  | 34.782001 | 31.740000 | 42.328999 |
| C  | 36.049999 | 32.037998 | 41.907001 |
| C  | 36.967999 | 31.830999 | 42.992001 |
| C  | 38.341000 | 32.054001 | 42.923000 |
| C  | 39.257999 | 31.862000 | 43.952999 |
| C  | 40.698002 | 32.067001 | 43.831001 |
| C  | 41.195999 | 31.705999 | 45.056999 |
| C  | 40.101002 | 31.319000 | 45.905998 |
| C  | 40.223000 | 30.889999 | 47.223000 |
| C  | 39.182999 | 30.450001 | 48.026001 |
| C  | 39.337002 | 29.990000 | 49.383999 |
| C  | 37.181999 | 29.850000 | 48.752998 |
| C  | 38.117001 | 29.591999 | 49.820999 |
| H  | 35.423000 | 29.246000 | 49.764999 |
| H  | 32.890999 | 31.080000 | 44.188000 |
| H  | 38.730999 | 32.398998 | 41.972000 |
| H  | 41.220001 | 30.875999 | 47.648998 |
| Fe | 37.063000 | 30.862000 | 45.882999 |
| C  | 35.632999 | 33.591000 | 46.459999 |
| C  | 35.437000 | 34.923000 | 47.005001 |
| C  | 36.256001 | 35.598999 | 47.946999 |
| C  | 37.418999 | 34.997002 | 48.507999 |
| C  | 35.952000 | 36.951000 | 48.264999 |
| C  | 38.248001 | 35.741001 | 49.337002 |
| C  | 36.807999 | 37.688999 | 49.063999 |
| C  | 37.958000 | 37.084000 | 49.595001 |
| H  | 34.752998 | 33.287998 | 47.185001 |
| H  | 35.112000 | 33.469002 | 45.487999 |
| H  | 34.525002 | 35.422001 | 46.675999 |
| H  | 37.629002 | 33.960999 | 48.278999 |
| H  | 35.062000 | 37.412998 | 47.842999 |
| H  | 39.133999 | 35.286999 | 49.768002 |
| H  | 36.598999 | 38.735001 | 49.271000 |
| H  | 38.633999 | 37.672001 | 50.208000 |
| O  | 36.742001 | 32.908001 | 46.643002 |

LA1-TS3-trans-si<sup>d</sup>

|    |           |           |           |
|----|-----------|-----------|-----------|
| S  | 37.316002 | 28.707001 | 44.931000 |
| C  | 37.976002 | 27.514999 | 46.160999 |
| H  | 38.540001 | 26.746000 | 45.619999 |
| H  | 38.650002 | 28.014000 | 46.855000 |
| N  | 35.172001 | 30.285000 | 46.554001 |
| N  | 36.193001 | 31.319000 | 44.066002 |
| N  | 38.827000 | 31.393000 | 45.196999 |
| C  | 33.437000 | 29.597000 | 47.919998 |
| N  | 37.792999 | 30.295000 | 47.653999 |
| C  | 32.895000 | 29.965000 | 46.728001 |
| C  | 34.862000 | 29.818001 | 47.818001 |
| C  | 35.76698  | 29.589001 | 48.848999 |
| C  | 33.980999 | 30.382999 | 45.862999 |
| C  | 33.849998 | 30.812000 | 44.540001 |
| C  | 34.877998 | 31.215000 | 43.682999 |
| C  | 34.706001 | 31.624001 | 42.291000 |
| C  | 35.962002 | 31.975000 | 41.881001 |
| C  | 36.882000 | 31.787001 | 42.971001 |
| C  | 38.248001 | 32.049999 | 42.914001 |
| C  | 39.162998 | 31.857000 | 43.946999 |
| C  | 40.599998 | 32.083000 | 43.830002 |
| C  | 41.099998 | 31.702000 | 45.049000 |
| C  | 40.007000 | 31.285000 | 45.888000 |
| C  | 40.143002 | 30.843000 | 47.202000 |
| C  | 39.117001 | 30.396999 | 48.019001 |
| C  | 39.289001 | 29.952999 | 49.387001 |
| C  | 37.134998 | 29.802999 | 48.764000 |
| C  | 38.076000 | 29.565001 | 49.839001 |
| H  | 35.370998 | 29.211000 | 49.779999 |
| H  | 32.841000 | 30.865999 | 44.146000 |
| H  | 38.634998 | 32.418999 | 41.971001 |
| H  | 41.143002 | 30.840000 | 47.618999 |
| Fe | 36.988998 | 30.774000 | 45.862999 |
| C  | 35.608002 | 33.331001 | 46.403000 |
| C  | 35.366001 | 34.604000 | 47.055000 |
| C  | 36.265999 | 35.323002 | 47.893002 |
| C  | 37.344002 | 34.668999 | 48.553001 |
| C  | 36.069000 | 36.716000 | 48.096001 |
| C  | 38.194000 | 35.397999 | 49.376999 |
| C  | 36.938000 | 37.431999 | 48.901001 |
| C  | 38.002998 | 36.773998 | 49.535999 |
| H  | 34.679001 | 32.800999 | 46.125000 |
| H  | 35.722000 | 34.036999 | 45.460999 |
| H  | 34.457001 | 35.111000 | 46.733002 |
| H  | 37.483002 | 33.605999 | 48.402000 |
| H  | 35.243999 | 37.216999 | 47.596001 |
| H  | 39.014000 | 34.902000 | 49.883999 |
| H  | 36.806000 | 38.502998 | 49.032001 |
| H  | 38.688000 | 37.348999 | 50.153999 |
| O  | 36.682999 | 32.612000 | 46.644001 |

LA1-TS3-trans-si<sup>a</sup>

|    |           |           |           |
|----|-----------|-----------|-----------|
| S  | 37.320000 | 28.580000 | 44.855999 |
| C  | 38.018002 | 27.438999 | 46.118000 |
| H  | 38.582001 | 26.636000 | 45.631001 |
| H  | 38.688000 | 27.979000 | 46.786999 |
| N  | 35.201000 | 30.403000 | 46.591999 |
| N  | 36.254002 | 31.414000 | 44.116001 |
| N  | 38.908001 | 31.447001 | 45.234001 |
| C  | 33.469002 | 29.680000 | 47.943001 |
| N  | 37.849998 | 30.344999 | 47.660000 |
| C  | 32.924000 | 30.093000 | 46.766998 |
| C  | 34.896000 | 29.893999 | 47.837002 |
| C  | 35.811001 | 29.622999 | 48.849998 |
| C  | 34.009998 | 30.528000 | 45.910000 |
| C  | 33.889000 | 30.976999 | 44.595001 |
| C  | 34.931000 | 31.343000 | 43.740002 |
| C  | 34.771999 | 31.731001 | 42.344002 |
| C  | 36.039001 | 32.040001 | 41.924999 |
| C  | 36.955002 | 31.846001 | 43.013000 |
| C  | 38.327000 | 32.077999 | 42.944000 |
| C  | 39.243999 | 31.886000 | 43.973999 |
| C  | 40.683998 | 32.088001 | 43.848999 |
| C  | 41.183998 | 31.719999 | 45.073002 |
| C  | 40.090000 | 31.330999 | 45.922001 |
| C  | 40.215000 | 30.891001 | 47.235001 |
| C  | 39.176998 | 30.441000 | 48.036999 |
| C  | 39.333000 | 29.979000 | 49.393002 |
| C  | 37.179001 | 29.830999 | 48.761002 |
| C  | 38.113998 | 29.577000 | 49.830002 |
| H  | 35.421001 | 29.223000 | 49.772999 |
| H  | 32.882999 | 31.055000 | 44.196999 |
| H  | 38.715000 | 32.424000 | 41.993000 |
| H  | 41.212002 | 30.877001 | 47.660000 |
| Fe | 37.055000 | 30.860001 | 45.898998 |
| C  | 35.589001 | 33.542000 | 46.624001 |
| C  | 35.335999 | 34.800999 | 47.310001 |
| C  | 36.258999 | 35.554001 | 48.080002 |
| C  | 37.430000 | 34.949001 | 48.618000 |
| C  | 36.001999 | 36.928001 | 48.340000 |
| C  | 38.305000 | 35.705002 | 49.388000 |
| C  | 36.900002 | 37.674999 | 49.081001 |
| C  | 38.050999 | 37.063000 | 49.603001 |
| H  | 34.659000 | 32.945000 | 46.514000 |
| H  | 35.521000 | 34.161999 | 45.636002 |
| H  | 34.377998 | 35.264999 | 47.071999 |
| H  | 37.611000 | 33.900002 | 48.418999 |
| H  | 35.106998 | 37.390999 | 47.931000 |
| H  | 39.193001 | 35.249001 | 49.810001 |
| H  | 36.722000 | 38.734001 | 49.252998 |
| H  | 38.754002 | 37.658001 | 50.178001 |
| O  | 36.720001 | 32.877998 | 46.743999 |

LA1-3<sup>d</sup>

|    |           |           |           |
|----|-----------|-----------|-----------|
| S  | 37.415001 | 28.669001 | 44.886002 |
| C  | 38.023998 | 27.506001 | 46.161999 |
| H  | 38.588001 | 26.721001 | 45.646000 |
| H  | 38.692001 | 28.010000 | 46.858002 |
| N  | 35.173000 | 30.214001 | 46.476002 |
| N  | 36.201000 | 31.228001 | 43.986000 |
| N  | 38.806999 | 31.398001 | 45.141998 |
| C  | 33.430000 | 29.544001 | 47.845001 |
| N  | 37.769001 | 30.312000 | 47.598000 |
| C  | 32.898998 | 29.850000 | 46.630001 |
| C  | 34.848999 | 29.788000 | 47.754002 |
| C  | 35.744999 | 29.608000 | 48.801998 |
| C  | 33.987000 | 30.256001 | 45.764000 |
| C  | 33.863998 | 30.657000 | 44.433998 |
| C  | 34.889000 | 31.099001 | 43.594002 |
| C  | 34.709999 | 31.542999 | 42.215000 |
| C  | 35.957001 | 31.944000 | 41.820000 |
| C  | 36.879002 | 31.747999 | 42.904999 |
| C  | 38.237000 | 32.047001 | 42.856998 |
| C  | 39.148998 | 31.863001 | 43.890999 |
| C  | 40.584000 | 32.099998 | 43.783001 |
| C  | 41.081001 | 31.716999 | 45.001999 |
| C  | 39.987999 | 31.292999 | 45.835999 |
| C  | 40.122002 | 30.854000 | 47.148998 |
| C  | 39.094002 | 30.415001 | 47.966000 |
| C  | 39.264999 | 29.982000 | 49.334999 |
| C  | 37.111000 | 29.827000 | 48.716999 |
| C  | 38.050999 | 29.599001 | 49.792999 |
| H  | 35.346001 | 29.256001 | 49.742001 |
| H  | 32.859001 | 30.681000 | 44.028000 |
| H  | 38.618999 | 32.438999 | 41.921001 |
| H  | 41.120998 | 30.858000 | 47.570000 |
| Fe | 36.992001 | 30.698000 | 45.776001 |
| C  | 35.466999 | 33.240002 | 46.492001 |
| C  | 35.161999 | 34.527000 | 47.210999 |
| C  | 36.313999 | 35.130001 | 47.978001 |
| C  | 36.971001 | 34.389000 | 48.973000 |
| C  | 36.751999 | 36.429001 | 47.695000 |
| C  | 38.057999 | 34.930000 | 49.655998 |
| C  | 37.827000 | 36.980999 | 48.396000 |
| C  | 38.484001 | 36.230999 | 49.370998 |
| H  | 34.304001 | 34.292999 | 47.865002 |
| H  | 34.637001 | 32.783001 | 45.935001 |
| H  | 34.757999 | 35.228001 | 46.463001 |
| H  | 36.641998 | 33.381001 | 49.205002 |
| H  | 36.254002 | 37.011002 | 46.922001 |
| H  | 38.574001 | 34.337002 | 50.403000 |
| H  | 38.150002 | 37.994999 | 48.169998 |
| H  | 39.330002 | 36.658001 | 49.903000 |
| O  | 36.558998 | 32.686001 | 46.526001 |

LA1-3<sup>a</sup>

|    |           |           |           |
|----|-----------|-----------|-----------|
| S  | 37.397999 | 28.493999 | 44.804001 |
| C  | 38.056000 | 27.382000 | 46.106998 |
| H  | 38.611000 | 26.559999 | 45.640999 |
| H  | 38.727001 | 27.924000 | 46.771999 |
| N  | 35.205002 | 30.319000 | 46.506001 |
| N  | 36.258999 | 31.292999 | 44.028999 |
| N  | 38.879002 | 31.407000 | 45.175999 |
| C  | 33.460999 | 29.632000 | 47.867001 |
| N  | 37.820000 | 30.333000 | 47.598999 |
| C  | 32.924999 | 30.004999 | 46.673000 |
| C  | 34.884998 | 29.846001 | 47.766998 |
| C  | 35.786999 | 29.607000 | 48.796001 |
| C  | 34.014000 | 30.417000 | 45.813000 |
| C  | 33.895000 | 30.837999 | 44.491001 |
| C  | 34.936001 | 31.218000 | 43.644001 |
| C  | 34.775002 | 31.636000 | 42.258999 |
| C  | 36.036999 | 31.978001 | 41.853001 |
| C  | 36.952999 | 31.771000 | 42.937000 |
| C  | 38.317001 | 32.034000 | 42.880001 |
| C  | 39.223999 | 31.856001 | 43.917999 |
| C  | 40.659000 | 32.088001 | 43.810001 |
| C  | 41.153999 | 31.724001 | 45.035999 |
| C  | 40.060001 | 31.315001 | 45.873001 |
| C  | 40.187000 | 30.882999 | 47.187000 |
| C  | 39.148998 | 30.434999 | 47.985001 |
| C  | 39.303001 | 29.985001 | 49.341999 |
| C  | 37.153000 | 29.823000 | 48.709999 |
| C  | 38.084000 | 29.582001 | 49.780998 |
| H  | 35.393002 | 29.226999 | 49.726002 |
| H  | 32.890999 | 30.903000 | 44.087002 |
| H  | 38.705002 | 32.403999 | 41.938000 |
| H  | 41.181999 | 30.886000 | 47.618000 |
| Fe | 37.058998 | 30.688999 | 45.785000 |
| C  | 35.382000 | 33.544998 | 46.771000 |
| C  | 35.101002 | 34.757000 | 47.630001 |
| C  | 36.308998 | 35.327000 | 48.334999 |
| C  | 37.089001 | 34.511002 | 49.167999 |
| C  | 36.681999 | 36.661999 | 48.146999 |
| C  | 38.236000 | 35.014000 | 49.777000 |
| C  | 37.817001 | 37.175999 | 48.778000 |
| C  | 38.599998 | 36.351002 | 49.584999 |
| H  | 34.312000 | 34.445000 | 48.334999 |
| H  | 34.499001 | 33.084000 | 46.291000 |
| H  | 34.619999 | 35.507000 | 46.983002 |
| H  | 36.808998 | 33.474998 | 49.327999 |
| H  | 36.084000 | 37.304001 | 47.502998 |
| H  | 38.847000 | 34.367001 | 50.396999 |
| H  | 38.091000 | 38.217999 | 48.629002 |
| H  | 39.493000 | 36.747002 | 50.060001 |
| O  | 36.486000 | 33.056000 | 46.610001 |

**Table S15:** Cartesian coordinates (xyz, in Å) of the QM atoms of all QM/MM optimized stationary points reported in **Figures S19** and **S22**, and **Table S7**.

| aMOx-1 <sup>d</sup> |           |           |           | aMOx-1 <sup>e</sup> |           |           |           |
|---------------------|-----------|-----------|-----------|---------------------|-----------|-----------|-----------|
| S                   | 38.126999 | 29.646000 | 49.098999 | S                   | 38.119999 | 29.658001 | 49.104000 |
| C                   | 38.959000 | 29.124001 | 50.644001 | C                   | 38.956001 | 29.132999 | 50.645000 |
| H                   | 39.398998 | 28.132000 | 50.486000 | H                   | 39.396000 | 28.141001 | 50.483002 |
| H                   | 39.751999 | 29.818001 | 50.922001 | H                   | 39.748001 | 29.826000 | 50.924000 |
| N                   | 36.367001 | 32.073002 | 50.259998 | N                   | 36.359001 | 32.071999 | 50.261002 |
| N                   | 36.743000 | 31.622999 | 47.455002 | N                   | 36.736000 | 31.625999 | 47.457001 |
| N                   | 39.578999 | 32.029999 | 47.777000 | N                   | 39.570999 | 32.036999 | 47.778000 |
| C                   | 35.002998 | 32.442001 | 52.105000 | C                   | 34.994999 | 32.443001 | 52.106998 |
| N                   | 39.172001 | 32.409000 | 50.591000 | N                   | 39.165001 | 32.410999 | 50.591999 |
| C                   | 34.195000 | 32.078999 | 51.082001 | C                   | 34.187000 | 32.078999 | 51.084000 |
| C                   | 36.349998 | 32.442001 | 51.581001 | C                   | 36.342999 | 32.442001 | 51.582001 |
| C                   | 37.473999 | 32.778000 | 52.330002 | C                   | 37.466000 | 32.779999 | 52.330002 |
| C                   | 35.040001 | 31.862000 | 49.922001 | C                   | 35.032001 | 31.860001 | 49.924000 |
| C                   | 34.609001 | 31.535000 | 48.646999 | C                   | 34.602001 | 31.533001 | 48.648998 |
| C                   | 35.393002 | 31.447001 | 47.481998 | C                   | 35.386002 | 31.445999 | 47.484001 |
| C                   | 34.866001 | 31.198000 | 46.147999 | C                   | 34.859001 | 31.195000 | 46.150002 |
| C                   | 35.960999 | 31.278999 | 45.327999 | C                   | 35.953999 | 31.278999 | 45.330002 |
| C                   | 37.120998 | 31.528999 | 46.139000 | C                   | 37.112999 | 31.533001 | 46.139999 |
| C                   | 38.422001 | 31.669001 | 45.661999 | C                   | 38.414001 | 31.676001 | 45.662998 |
| C                   | 39.573002 | 31.884001 | 46.419998 | C                   | 39.564999 | 31.892000 | 46.419998 |
| C                   | 40.922001 | 31.903999 | 45.870998 | C                   | 40.914001 | 31.910000 | 45.872002 |
| C                   | 41.724998 | 32.046001 | 46.970001 | C                   | 41.716999 | 32.049000 | 46.972000 |
| C                   | 40.889999 | 32.133999 | 48.141998 | C                   | 40.882000 | 32.137001 | 48.144001 |
| C                   | 41.340000 | 32.323002 | 49.453999 | C                   | 41.333000 | 32.320999 | 49.455002 |
| C                   | 40.549000 | 32.509998 | 50.577999 | C                   | 40.542000 | 32.511002 | 50.580002 |
| C                   | 41.023998 | 32.915001 | 51.888000 | C                   | 41.016998 | 32.916000 | 51.889999 |
| C                   | 38.785000 | 32.749001 | 51.863998 | C                   | 38.778000 | 32.751999 | 51.865002 |
| C                   | 39.933998 | 33.083000 | 52.673000 | C                   | 39.926998 | 33.085999 | 52.674000 |
| H                   | 37.316002 | 33.089001 | 53.355000 | H                   | 37.307999 | 33.091999 | 53.355999 |
| H                   | 33.540001 | 31.388000 | 48.523998 | H                   | 33.533001 | 31.385000 | 48.526001 |
| H                   | 38.557999 | 31.576000 | 44.590000 | H                   | 38.549999 | 31.583000 | 44.591000 |
| H                   | 42.411999 | 32.368999 | 49.603001 | H                   | 42.403999 | 32.365002 | 49.605000 |
| Fe                  | 37.948002 | 32.120998 | 49.002998 | Fe                  | 37.939999 | 32.117001 | 49.004002 |
| C                   | 36.832001 | 35.960999 | 50.279999 | C                   | 36.869999 | 35.979000 | 50.298000 |
| C                   | 37.174999 | 37.234001 | 50.064999 | C                   | 37.202999 | 37.251999 | 50.074001 |
| C                   | 36.268002 | 38.330002 | 49.716999 | C                   | 36.287998 | 38.341000 | 49.720001 |
| C                   | 36.818001 | 39.519001 | 49.214001 | C                   | 36.830002 | 39.530998 | 49.210999 |
| C                   | 34.868999 | 38.252998 | 49.859001 | C                   | 34.889999 | 38.255001 | 49.865002 |
| C                   | 36.001999 | 40.585999 | 48.855999 | C                   | 36.007000 | 40.591000 | 48.849998 |
| C                   | 34.053001 | 39.321999 | 49.505001 | C                   | 34.067001 | 39.318001 | 49.507000 |
| C                   | 34.617001 | 40.497002 | 49.000000 | C                   | 34.622002 | 40.493999 | 48.995998 |
| H                   | 37.580002 | 35.222000 | 50.525002 | H                   | 37.625000 | 35.247002 | 50.547001 |
| H                   | 35.807999 | 35.605999 | 50.201000 | H                   | 35.848999 | 35.616001 | 50.224998 |
| H                   | 38.228001 | 37.506001 | 50.105999 | H                   | 38.254002 | 37.533001 | 50.110001 |
| H                   | 37.893002 | 39.589001 | 49.069000 | H                   | 37.903999 | 39.605999 | 49.063999 |
| H                   | 34.417999 | 37.348000 | 50.255001 | H                   | 34.445000 | 37.349998 | 50.265999 |
| H                   | 36.462002 | 41.473999 | 48.428001 | H                   | 36.460999 | 41.480000 | 48.416000 |
| H                   | 32.976002 | 39.245998 | 49.612999 | H                   | 32.990002 | 39.237000 | 49.616001 |
| H                   | 33.973999 | 41.324001 | 48.710999 | H                   | 33.973999 | 41.316002 | 48.703999 |
| O                   | 37.758999 | 33.714001 | 48.723000 | O                   | 37.751999 | 33.714001 | 48.737999 |

aMOx-TS1<sup>d</sup>

|    |           |           |           |
|----|-----------|-----------|-----------|
| S  | 38.063000 | 29.976999 | 49.179001 |
| C  | 38.916000 | 29.389999 | 50.689999 |
| H  | 39.379002 | 28.422001 | 50.465000 |
| H  | 39.695999 | 30.084999 | 51.000999 |
| N  | 36.352001 | 32.377998 | 50.375000 |
| N  | 36.720001 | 31.936001 | 47.574001 |
| N  | 39.556999 | 32.300999 | 47.893002 |
| C  | 35.002998 | 32.632999 | 52.245998 |
| N  | 39.150002 | 32.647999 | 50.708000 |
| C  | 34.193001 | 32.313999 | 51.207001 |
| C  | 36.348000 | 32.668999 | 51.723000 |
| C  | 37.469002 | 32.958000 | 52.484001 |
| C  | 35.030998 | 32.150002 | 50.035999 |
| C  | 34.588001 | 31.820000 | 48.764000 |
| C  | 35.368999 | 31.733999 | 47.608002 |
| C  | 34.851002 | 31.436001 | 46.279999 |
| C  | 35.945000 | 31.514999 | 45.459999 |
| C  | 37.103001 | 31.805000 | 46.261002 |
| C  | 38.398998 | 31.931000 | 45.775002 |
| C  | 39.544998 | 32.139000 | 46.535000 |
| C  | 40.896000 | 32.105000 | 45.991001 |
| C  | 41.702000 | 32.217999 | 47.090000 |
| C  | 40.873001 | 32.348000 | 48.264000 |
| C  | 41.327000 | 32.507000 | 49.571999 |
| C  | 40.532001 | 32.702999 | 50.692001 |
| C  | 41.014999 | 33.046001 | 52.014999 |
| C  | 38.771000 | 32.933998 | 52.004002 |
| C  | 39.931999 | 33.209000 | 52.812000 |
| H  | 37.320000 | 33.207001 | 53.526001 |
| H  | 33.521000 | 31.653000 | 48.650002 |
| H  | 38.535000 | 31.808001 | 44.707001 |
| H  | 42.397999 | 32.507999 | 49.730000 |
| Fe | 37.926998 | 32.421001 | 49.137001 |
| C  | 37.547001 | 35.554001 | 50.217999 |
| C  | 37.355999 | 36.778999 | 49.623001 |
| C  | 36.098999 | 37.485001 | 49.526001 |
| C  | 36.115002 | 38.838001 | 49.116001 |
| C  | 34.862000 | 36.923000 | 49.924000 |
| C  | 34.958000 | 39.605999 | 49.155998 |
| C  | 33.714001 | 37.701000 | 49.969002 |
| C  | 33.755001 | 39.047001 | 49.590000 |
| H  | 38.535999 | 35.263000 | 50.535999 |
| H  | 36.727001 | 35.037998 | 50.695000 |
| H  | 38.224998 | 37.317001 | 49.247002 |
| H  | 37.053001 | 39.276001 | 48.779999 |
| H  | 34.806999 | 35.877998 | 50.203999 |
| H  | 34.985001 | 40.650002 | 48.854000 |
| H  | 32.778999 | 37.265999 | 50.306000 |
| H  | 32.858002 | 39.652000 | 49.615002 |
| O  | 37.786999 | 34.061001 | 48.796001 |

aMOx-TS1<sup>a</sup>

|    |           |           |           |
|----|-----------|-----------|-----------|
| S  | 37.995998 | 30.016001 | 49.245998 |
| C  | 38.855999 | 29.421000 | 50.743999 |
| H  | 39.332001 | 28.462999 | 50.499001 |
| H  | 39.624001 | 30.122999 | 51.064999 |
| N  | 36.355000 | 32.388000 | 50.346001 |
| N  | 36.734001 | 31.978001 | 47.542999 |
| N  | 39.556999 | 32.334000 | 47.853001 |
| C  | 35.021000 | 32.623001 | 52.230000 |
| N  | 39.176998 | 32.639999 | 50.680000 |
| C  | 34.202999 | 32.326000 | 51.192001 |
| C  | 36.362999 | 32.658001 | 51.695999 |
| C  | 37.491001 | 32.931999 | 52.453999 |
| C  | 35.035999 | 32.180000 | 50.014000 |
| C  | 34.591000 | 31.875000 | 48.733002 |
| C  | 35.375000 | 31.781000 | 47.582001 |
| C  | 34.855999 | 31.473000 | 46.257000 |
| C  | 35.948002 | 31.537001 | 45.433998 |
| C  | 37.109001 | 31.830000 | 46.228001 |
| C  | 38.403000 | 31.951000 | 45.737000 |
| C  | 39.549000 | 32.165001 | 46.494999 |
| C  | 40.900002 | 32.129002 | 45.952000 |
| C  | 41.705002 | 32.248001 | 47.050999 |
| C  | 40.876999 | 32.380001 | 48.224998 |
| C  | 41.339001 | 32.535999 | 49.529999 |
| C  | 40.551998 | 32.717999 | 50.660999 |
| C  | 41.037998 | 33.063999 | 51.983002 |
| C  | 38.796001 | 32.918999 | 51.973000 |
| C  | 39.953999 | 33.206001 | 52.784000 |
| H  | 37.346001 | 33.171001 | 53.499001 |
| H  | 33.522999 | 31.722000 | 48.612000 |
| H  | 38.536999 | 31.822001 | 44.668999 |
| H  | 42.410999 | 32.540001 | 49.680000 |
| Fe | 37.943001 | 32.428001 | 49.076000 |
| C  | 37.535000 | 35.535000 | 50.271999 |
| C  | 37.355000 | 36.777000 | 49.695000 |
| C  | 36.101002 | 37.480999 | 49.571999 |
| C  | 36.123001 | 38.833000 | 49.155998 |
| C  | 34.855000 | 36.924000 | 49.952000 |
| C  | 34.966000 | 39.602001 | 49.168999 |
| C  | 33.708000 | 37.702999 | 49.972000 |
| C  | 33.754002 | 39.046001 | 49.584999 |
| H  | 38.513000 | 35.264000 | 50.638000 |
| H  | 36.703999 | 35.021000 | 50.730999 |
| H  | 38.233002 | 37.323002 | 49.355000 |
| H  | 37.066002 | 39.270000 | 48.834999 |
| H  | 34.792999 | 35.881001 | 50.240002 |
| H  | 34.999001 | 40.643002 | 48.862000 |
| H  | 32.766998 | 37.270000 | 50.298000 |
| H  | 32.855999 | 39.652000 | 49.590000 |
| O  | 37.816002 | 34.110001 | 48.875999 |

aMOx-Int1<sup>d</sup>

|    |           |           |           |
|----|-----------|-----------|-----------|
| S  | 37.983002 | 29.915001 | 49.196999 |
| C  | 38.891998 | 29.327000 | 50.680000 |
| H  | 39.348000 | 28.356001 | 50.449001 |
| H  | 39.674999 | 30.025999 | 50.971001 |
| N  | 36.247002 | 32.271000 | 50.437000 |
| N  | 36.584000 | 31.898001 | 47.640999 |
| N  | 39.445000 | 32.305000 | 47.936001 |
| C  | 34.924000 | 32.547001 | 52.326000 |
| N  | 39.077999 | 32.584000 | 50.750000 |
| C  | 34.098000 | 32.217999 | 51.305000 |
| C  | 36.262001 | 32.576000 | 51.783001 |
| C  | 37.395000 | 32.891998 | 52.516998 |
| C  | 34.917999 | 32.049000 | 50.124001 |
| C  | 34.465000 | 31.743000 | 48.848000 |
| C  | 35.238998 | 31.663000 | 47.679001 |
| C  | 34.722000 | 31.327999 | 46.362999 |
| C  | 35.816002 | 31.403999 | 45.539001 |
| C  | 36.966000 | 31.740000 | 46.333000 |
| C  | 38.265999 | 31.886999 | 45.841999 |
| C  | 39.419998 | 32.132999 | 46.578999 |
| C  | 40.764000 | 32.122002 | 46.011002 |
| C  | 41.582001 | 32.256001 | 47.099998 |
| C  | 40.761002 | 32.369999 | 48.282001 |
| C  | 41.236000 | 32.525002 | 49.591000 |
| C  | 40.456001 | 32.686001 | 50.723999 |
| C  | 40.945000 | 33.060001 | 52.040001 |
| C  | 38.702999 | 32.888000 | 52.029999 |
| C  | 39.861000 | 33.207001 | 52.837002 |
| H  | 37.252998 | 33.158001 | 53.556999 |
| H  | 33.397999 | 31.576000 | 48.737999 |
| H  | 38.396000 | 31.743999 | 44.775002 |
| H  | 42.310001 | 32.550999 | 49.730000 |
| Fe | 37.820000 | 32.304001 | 49.189999 |
| C  | 36.543999 | 34.907001 | 49.316002 |
| C  | 36.893002 | 36.337002 | 49.493000 |
| C  | 36.028999 | 37.452999 | 49.548000 |
| C  | 36.608002 | 38.741001 | 49.735001 |
| C  | 34.605999 | 37.365002 | 49.500999 |
| C  | 35.817001 | 39.865002 | 49.893002 |
| C  | 33.827000 | 38.497002 | 49.689999 |
| C  | 34.421001 | 39.750999 | 49.886002 |
| H  | 36.087002 | 34.556999 | 50.262001 |
| H  | 35.733002 | 34.786999 | 48.574001 |
| H  | 37.948002 | 36.537998 | 49.654999 |
| H  | 37.691002 | 38.830002 | 49.738998 |
| H  | 34.131001 | 36.405998 | 49.325001 |
| H  | 36.284000 | 40.837002 | 50.030998 |
| H  | 32.743999 | 38.426998 | 49.688000 |
| H  | 33.798000 | 40.631001 | 50.020000 |
| O  | 37.689999 | 34.172001 | 49.002998 |

aMOx-Int1<sup>a</sup>

|    |           |           |           |
|----|-----------|-----------|-----------|
| S  | 38.008999 | 30.009001 | 49.249001 |
| C  | 38.858002 | 29.431000 | 50.757999 |
| H  | 39.344002 | 28.479000 | 50.508999 |
| H  | 39.618999 | 30.138000 | 51.084999 |
| N  | 36.237999 | 32.259998 | 50.446999 |
| N  | 36.583000 | 31.855000 | 47.651001 |
| N  | 39.402000 | 32.363998 | 47.938000 |
| C  | 34.910000 | 32.527000 | 52.321999 |
| N  | 39.033001 | 32.615002 | 50.754002 |
| C  | 34.099998 | 32.140999 | 51.305000 |
| C  | 36.243999 | 32.597000 | 51.789001 |
| C  | 37.356998 | 32.950001 | 52.529999 |
| C  | 34.921001 | 31.976999 | 50.127998 |
| C  | 34.469002 | 31.622000 | 48.866001 |
| C  | 35.240002 | 31.583000 | 47.702999 |
| C  | 34.726002 | 31.273001 | 46.381001 |
| C  | 35.806000 | 31.409000 | 45.548000 |
| C  | 36.959000 | 31.753000 | 46.332001 |
| C  | 38.237999 | 31.948999 | 45.826000 |
| C  | 39.379002 | 32.198002 | 46.577000 |
| C  | 40.726002 | 32.188000 | 46.021999 |
| C  | 41.541000 | 32.299999 | 47.115002 |
| C  | 40.724998 | 32.407001 | 48.298000 |
| C  | 41.202999 | 32.536999 | 49.597000 |
| C  | 40.411999 | 32.706001 | 50.723000 |
| C  | 40.896000 | 33.076000 | 52.036999 |
| C  | 38.652000 | 32.936001 | 52.042000 |
| C  | 39.814999 | 33.240002 | 52.837002 |
| H  | 37.209000 | 33.228001 | 53.564999 |
| H  | 33.408001 | 31.419001 | 48.763000 |
| H  | 38.368000 | 31.834000 | 44.756001 |
| H  | 42.276001 | 32.549000 | 49.741001 |
| Fe | 37.786999 | 32.337002 | 49.206001 |
| C  | 36.473999 | 34.946999 | 49.384998 |
| C  | 36.896000 | 36.379002 | 49.452999 |
| C  | 36.041000 | 37.500999 | 49.541000 |
| C  | 36.627998 | 38.792000 | 49.695999 |
| C  | 34.616001 | 37.430000 | 49.535000 |
| C  | 35.848000 | 39.921001 | 49.866001 |
| C  | 33.847000 | 38.570999 | 49.717999 |
| C  | 34.449001 | 39.825001 | 49.889000 |
| H  | 36.118999 | 34.631001 | 50.375999 |
| H  | 35.624001 | 34.803001 | 48.700001 |
| H  | 37.959000 | 36.564999 | 49.561001 |
| H  | 37.712002 | 38.877998 | 49.671001 |
| H  | 34.125000 | 36.473999 | 49.384998 |
| H  | 36.328999 | 40.888000 | 49.988998 |
| H  | 32.763000 | 38.505001 | 49.728001 |
| H  | 33.837002 | 40.712002 | 50.025002 |
| O  | 37.566002 | 34.138000 | 48.978001 |



aMOx-TS-rotation<sup>d</sup>

|    |           |           |           |
|----|-----------|-----------|-----------|
| S  | 38.002087 | 29.767460 | 49.151737 |
| C  | 38.881031 | 29.270708 | 50.681366 |
| H  | 39.357658 | 28.299742 | 50.500542 |
| H  | 39.645802 | 29.994646 | 50.959263 |
| N  | 36.149788 | 32.089813 | 50.227253 |
| N  | 36.553005 | 31.585133 | 47.448318 |
| N  | 39.380875 | 32.108219 | 47.791580 |
| C  | 34.782070 | 32.438728 | 52.069244 |
| N  | 38.949913 | 32.556328 | 50.567970 |
| C  | 33.985497 | 32.037300 | 51.049252 |
| C  | 36.130329 | 32.475979 | 51.548988 |
| C  | 37.233990 | 32.858528 | 52.298576 |
| C  | 34.836983 | 31.824940 | 49.892067 |
| C  | 34.414009 | 31.452093 | 48.621765 |
| C  | 35.207973 | 31.364742 | 47.469563 |
| C  | 34.702572 | 31.064125 | 46.133030 |
| C  | 35.804462 | 31.154913 | 45.324821 |
| C  | 36.950817 | 31.464493 | 46.143135 |
| C  | 38.252396 | 31.630722 | 45.673695 |
| C  | 39.385506 | 31.911085 | 46.435947 |
| C  | 40.741020 | 31.949356 | 45.898773 |
| C  | 41.533642 | 32.134293 | 47.001095 |
| C  | 40.691849 | 32.236359 | 48.166290 |
| C  | 41.138969 | 32.452579 | 49.472820 |
| C  | 40.327915 | 32.655556 | 50.578671 |
| C  | 40.783756 | 33.059685 | 51.897205 |
| C  | 38.543522 | 32.874420 | 51.845570 |
| C  | 39.682541 | 33.221180 | 52.669197 |
| H  | 37.062206 | 33.156807 | 53.324265 |
| H  | 33.350780 | 31.264929 | 48.501083 |
| H  | 38.407200 | 31.492109 | 44.609188 |
| H  | 42.210350 | 32.495922 | 49.633202 |
| Fe | 37.745632 | 32.059376 | 49.007801 |
| C  | 38.158058 | 34.909389 | 49.017178 |
| C  | 37.491215 | 36.132545 | 48.501152 |
| C  | 36.211067 | 36.595428 | 48.870773 |
| C  | 35.824718 | 37.909016 | 48.478939 |
| C  | 35.318401 | 35.831535 | 49.678776 |
| C  | 34.639046 | 38.457699 | 48.938923 |
| C  | 34.126453 | 36.384560 | 50.114941 |
| C  | 33.791267 | 37.699951 | 49.758801 |
| H  | 39.179211 | 34.830502 | 48.626945 |
| H  | 38.223427 | 34.951035 | 50.117760 |
| H  | 38.021320 | 36.735939 | 47.761806 |
| H  | 36.496693 | 38.485798 | 47.847569 |
| H  | 35.578995 | 34.804268 | 49.899158 |
| H  | 34.355698 | 39.470322 | 48.662613 |
| H  | 33.444656 | 35.797256 | 50.721790 |
| H  | 32.854218 | 38.137398 | 50.093941 |
| O  | 37.336555 | 33.878475 | 48.551254 |

aMOx-TS-rotation<sup>d</sup>

|    |           |           |           |
|----|-----------|-----------|-----------|
| S  | 38.036873 | 29.827530 | 49.166027 |
| C  | 38.870251 | 29.326113 | 50.713818 |
| H  | 39.360943 | 28.363853 | 50.525654 |
| H  | 39.625584 | 30.052069 | 51.012276 |
| N  | 36.165062 | 32.127254 | 50.276329 |
| N  | 36.573402 | 31.636469 | 47.490681 |
| N  | 39.383217 | 32.190262 | 47.801476 |
| C  | 34.799297 | 32.477364 | 52.112701 |
| N  | 38.951649 | 32.562336 | 50.587475 |
| C  | 34.009026 | 32.051483 | 51.098866 |
| C  | 36.144714 | 32.531620 | 51.592892 |
| C  | 37.245686 | 32.918392 | 52.335285 |
| C  | 34.859192 | 31.841261 | 49.941658 |
| C  | 34.435589 | 31.449663 | 48.679203 |
| C  | 35.225414 | 31.395325 | 47.527508 |
| C  | 34.718021 | 31.116426 | 46.194111 |
| C  | 35.807915 | 31.250830 | 45.372551 |
| C  | 36.959496 | 31.560108 | 46.173443 |
| C  | 38.245766 | 31.754633 | 45.681408 |
| C  | 39.379372 | 32.014240 | 46.443272 |
| C  | 40.734638 | 32.029003 | 45.906700 |
| C  | 41.532192 | 32.175854 | 47.009731 |
| C  | 40.697212 | 32.276527 | 48.179058 |
| C  | 41.151009 | 32.450829 | 49.483364 |
| C  | 40.335728 | 32.644997 | 50.586056 |
| C  | 40.793442 | 33.034172 | 51.900330 |
| C  | 38.549210 | 32.898689 | 51.869061 |
| C  | 39.696342 | 33.216255 | 52.678734 |
| H  | 37.083271 | 33.228088 | 53.359058 |
| H  | 33.375702 | 31.248243 | 48.561295 |
| H  | 38.386318 | 31.644817 | 44.612404 |
| H  | 42.221584 | 32.476990 | 49.646786 |
| Fe | 37.746407 | 32.176376 | 49.036381 |
| C  | 38.020893 | 35.041275 | 49.193455 |
| C  | 37.467663 | 36.290241 | 48.582417 |
| C  | 36.220959 | 36.873589 | 48.926540 |
| C  | 35.927715 | 38.205055 | 48.517101 |
| C  | 35.244987 | 36.194614 | 49.709492 |
| C  | 34.752838 | 38.829140 | 48.908726 |
| C  | 34.065266 | 36.824123 | 50.080318 |
| C  | 33.813103 | 38.147278 | 49.693748 |
| H  | 39.091408 | 34.959606 | 48.986275 |
| H  | 37.886127 | 35.069736 | 50.284485 |
| H  | 38.088745 | 36.824703 | 47.866375 |
| H  | 36.662792 | 38.738304 | 47.917690 |
| H  | 35.420902 | 35.162857 | 49.988731 |
| H  | 34.554886 | 39.856533 | 48.608200 |
| H  | 33.327724 | 36.284786 | 50.667645 |
| H  | 32.888412 | 38.643456 | 49.975128 |
| O  | 37.356064 | 33.901646 | 48.666840 |

aMOx-TS2 pro-S<sup>d</sup>

|    |           |           |           |
|----|-----------|-----------|-----------|
| S  | 38.119999 | 29.905001 | 49.175999 |
| C  | 38.909000 | 29.371000 | 50.737999 |
| H  | 39.390999 | 28.407000 | 50.535999 |
| H  | 39.667999 | 30.083000 | 51.058998 |
| N  | 36.241001 | 32.074001 | 50.395000 |
| N  | 36.581001 | 31.752001 | 47.567001 |
| N  | 39.366001 | 32.342999 | 47.859001 |
| C  | 34.882999 | 32.366001 | 52.255001 |
| N  | 38.995998 | 32.639999 | 50.674999 |
| C  | 34.091000 | 31.933001 | 51.243000 |
| C  | 36.221001 | 32.451000 | 51.729000 |
| C  | 37.316002 | 32.889000 | 52.452999 |
| C  | 34.931000 | 31.756001 | 50.075001 |
| C  | 34.493000 | 31.419001 | 48.799000 |
| C  | 35.250000 | 31.441999 | 47.622002 |
| C  | 34.717999 | 31.171000 | 46.290001 |
| C  | 35.785000 | 31.360001 | 45.452000 |
| C  | 36.938999 | 31.698000 | 46.242001 |
| C  | 38.217999 | 31.919001 | 45.742001 |
| C  | 39.358002 | 32.175999 | 46.498001 |
| C  | 40.708000 | 32.176998 | 45.950001 |
| C  | 41.514000 | 32.305000 | 47.048000 |
| C  | 40.687000 | 32.410000 | 48.223999 |
| C  | 41.160000 | 32.567001 | 49.527000 |
| C  | 40.372002 | 32.743000 | 50.654999 |
| C  | 40.854000 | 33.124001 | 51.972000 |
| C  | 38.615002 | 32.938999 | 51.963001 |
| C  | 39.768002 | 33.276001 | 52.765999 |
| H  | 37.157001 | 33.176998 | 53.484001 |
| H  | 33.436001 | 31.191999 | 48.695000 |
| H  | 38.352001 | 31.819000 | 44.669998 |
| H  | 42.234001 | 32.587002 | 49.668999 |
| Fe | 37.785999 | 32.161999 | 49.137001 |
| C  | 36.092999 | 34.707001 | 49.376999 |
| C  | 36.807999 | 35.922001 | 49.740002 |
| C  | 36.456001 | 37.257999 | 49.368000 |
| C  | 37.301998 | 38.327000 | 49.748001 |
| C  | 35.151001 | 37.553001 | 48.896999 |
| C  | 36.828999 | 39.632000 | 49.749001 |
| C  | 34.675999 | 38.856998 | 48.931999 |
| C  | 35.504002 | 39.891998 | 49.377998 |
| H  | 35.728001 | 34.141998 | 50.233002 |
| H  | 35.257999 | 34.848000 | 48.680000 |
| H  | 37.661999 | 35.783001 | 50.393002 |
| H  | 38.318001 | 38.102001 | 50.053001 |
| H  | 34.500000 | 36.757000 | 48.555000 |
| H  | 37.477001 | 40.446999 | 50.058998 |
| H  | 33.653999 | 39.076000 | 48.632999 |
| H  | 35.105000 | 40.901001 | 49.435001 |
| O  | 37.243999 | 34.180000 | 48.759998 |

aMOx-TS2 pro-S<sup>a</sup>

|    |           |           |           |
|----|-----------|-----------|-----------|
| S  | 38.095001 | 29.742001 | 49.130001 |
| C  | 38.931000 | 29.233999 | 50.681000 |
| H  | 39.400002 | 28.254999 | 50.526001 |
| H  | 39.700001 | 29.954000 | 50.963001 |
| N  | 36.231998 | 32.131001 | 50.376999 |
| N  | 36.591000 | 31.825001 | 47.560001 |
| N  | 39.401001 | 32.365002 | 47.865002 |
| C  | 34.889000 | 32.401001 | 52.247002 |
| N  | 39.025002 | 32.598000 | 50.680000 |
| C  | 34.084999 | 32.016998 | 51.223999 |
| C  | 36.228001 | 32.467999 | 51.720001 |
| C  | 37.334000 | 32.855999 | 52.456001 |
| C  | 34.917000 | 31.858999 | 50.049999 |
| C  | 34.474998 | 31.545000 | 48.769001 |
| C  | 35.248001 | 31.551001 | 47.604000 |
| C  | 34.730000 | 31.291000 | 46.271000 |
| C  | 35.808998 | 31.457001 | 45.441002 |
| C  | 36.963001 | 31.768000 | 46.237999 |
| C  | 38.248001 | 31.968000 | 45.743000 |
| C  | 39.388000 | 32.203999 | 46.502998 |
| C  | 40.737999 | 32.193001 | 45.957001 |
| C  | 41.547001 | 32.311001 | 47.055000 |
| C  | 40.723999 | 32.417000 | 48.231998 |
| C  | 41.196999 | 32.555000 | 49.535000 |
| C  | 40.402000 | 32.713001 | 50.660999 |
| C  | 40.872002 | 33.091000 | 51.978001 |
| C  | 38.632999 | 32.895000 | 51.969002 |
| C  | 39.780998 | 33.233002 | 52.771000 |
| H  | 37.179001 | 33.125999 | 53.492001 |
| H  | 33.416000 | 31.339001 | 48.655998 |
| H  | 38.382999 | 31.870001 | 44.672001 |
| H  | 42.270000 | 32.574001 | 49.681000 |
| Fe | 37.805000 | 32.205002 | 49.125000 |
| C  | 36.210999 | 34.875000 | 49.522999 |
| C  | 36.827000 | 36.188999 | 49.716999 |
| C  | 36.314999 | 37.460999 | 49.327999 |
| C  | 37.084000 | 38.615002 | 49.623001 |
| C  | 34.965000 | 37.630001 | 48.921001 |
| C  | 36.502998 | 39.874001 | 49.611000 |
| C  | 34.388000 | 38.891998 | 48.930000 |
| C  | 35.145000 | 40.011002 | 49.294998 |
| H  | 35.932999 | 34.401001 | 50.469002 |
| H  | 35.320999 | 34.889999 | 48.877998 |
| H  | 37.764999 | 36.174999 | 50.259998 |
| H  | 38.132000 | 38.493000 | 49.879002 |
| H  | 34.369999 | 36.768002 | 48.643002 |
| H  | 37.095001 | 40.748001 | 49.863998 |
| H  | 33.341000 | 39.022999 | 48.672001 |
| H  | 34.669998 | 40.987999 | 49.325001 |
| O  | 37.337002 | 34.313999 | 48.902000 |

aMOx-TS2 pro-R<sup>d</sup>

|    |           |           |           |
|----|-----------|-----------|-----------|
| S  | 37.990002 | 29.936001 | 49.219002 |
| C  | 38.888000 | 29.361000 | 50.709999 |
| H  | 39.354000 | 28.396000 | 50.477001 |
| H  | 39.661999 | 30.066000 | 51.009998 |
| N  | 36.254002 | 32.276001 | 50.389000 |
| N  | 36.592999 | 31.840000 | 47.615002 |
| N  | 39.448002 | 32.266998 | 47.919998 |
| C  | 34.926998 | 32.535999 | 52.275002 |
| N  | 39.071999 | 32.625000 | 50.716000 |
| C  | 34.111000 | 32.146999 | 51.266998 |
| C  | 36.259998 | 32.616001 | 51.724998 |
| C  | 37.382000 | 32.970001 | 52.462002 |
| C  | 34.930000 | 31.982000 | 50.085999 |
| C  | 34.485001 | 31.605000 | 48.830002 |
| C  | 35.258999 | 31.538000 | 47.662998 |
| C  | 34.757000 | 31.146000 | 46.355000 |
| C  | 35.848000 | 31.239000 | 45.528999 |
| C  | 36.985001 | 31.645000 | 46.312000 |
| C  | 38.278999 | 31.809000 | 45.820999 |
| C  | 39.426998 | 32.070999 | 46.564999 |
| C  | 40.772999 | 32.053001 | 46.007000 |
| C  | 41.588001 | 32.196999 | 47.098000 |
| C  | 40.766998 | 32.332001 | 48.275002 |
| C  | 41.237000 | 32.509998 | 49.578999 |
| C  | 40.448002 | 32.710999 | 50.700001 |
| C  | 40.931000 | 33.102001 | 52.014999 |
| C  | 38.687000 | 32.959000 | 51.990002 |
| C  | 39.844002 | 33.277000 | 52.799999 |
| H  | 37.229000 | 33.248001 | 53.498001 |
| H  | 33.425999 | 31.381001 | 48.734001 |
| H  | 38.418999 | 31.642000 | 44.758999 |
| H  | 42.310001 | 32.528000 | 49.724998 |
| Fe | 37.831001 | 32.237000 | 49.174999 |
| C  | 36.417999 | 34.817001 | 49.061001 |
| C  | 36.826000 | 36.047001 | 48.359001 |
| C  | 37.109001 | 37.313999 | 48.925999 |
| C  | 37.459999 | 38.390999 | 48.071999 |
| C  | 37.018002 | 37.558998 | 50.319000 |
| C  | 37.661999 | 39.662998 | 48.584999 |
| C  | 37.243999 | 38.827999 | 50.826000 |
| C  | 37.554001 | 39.887001 | 49.963001 |
| H  | 35.993000 | 34.992001 | 50.056999 |
| H  | 35.694000 | 34.238998 | 48.473999 |
| H  | 37.051998 | 35.935001 | 47.306000 |
| H  | 37.550999 | 38.209999 | 47.005001 |
| H  | 36.798000 | 36.733002 | 50.978001 |
| H  | 37.910000 | 40.479000 | 47.914001 |
| H  | 37.193001 | 39.008999 | 51.895000 |
| H  | 37.717999 | 40.882000 | 50.369999 |
| O  | 37.698002 | 34.228001 | 49.105999 |

aMOx-TS2 pro-R<sup>a</sup>

|    |           |           |           |
|----|-----------|-----------|-----------|
| S  | 38.020000 | 29.660000 | 49.159000 |
| C  | 38.876999 | 29.173000 | 50.701000 |
| H  | 39.363998 | 28.205000 | 50.535000 |
| H  | 39.634998 | 29.905001 | 50.980000 |
| N  | 36.113998 | 31.985001 | 50.382999 |
| N  | 36.456001 | 31.562000 | 47.567001 |
| N  | 39.250999 | 32.187000 | 47.824001 |
| C  | 34.778999 | 32.316002 | 52.242001 |
| N  | 38.886002 | 32.508999 | 50.637001 |
| C  | 33.972000 | 31.885000 | 51.240002 |
| C  | 36.112999 | 32.374001 | 51.708000 |
| C  | 37.220001 | 32.784000 | 52.431999 |
| C  | 34.799000 | 31.690001 | 50.069000 |
| C  | 34.355000 | 31.316999 | 48.806000 |
| C  | 35.118999 | 31.274000 | 47.636002 |
| C  | 34.595001 | 30.941999 | 46.320000 |
| C  | 35.666000 | 31.083000 | 45.474998 |
| C  | 36.820999 | 31.452999 | 46.247002 |
| C  | 38.095001 | 31.667999 | 45.728001 |
| C  | 39.236000 | 31.971001 | 46.465000 |
| C  | 40.583000 | 31.997000 | 45.911999 |
| C  | 41.394001 | 32.160999 | 47.005001 |
| C  | 40.577000 | 32.269001 | 48.183998 |
| C  | 41.055000 | 32.426998 | 49.480999 |
| C  | 40.265999 | 32.597000 | 50.606998 |
| C  | 40.757000 | 32.952999 | 51.919998 |
| C  | 38.513000 | 32.812000 | 51.932999 |
| C  | 39.678001 | 33.127998 | 52.722000 |
| H  | 37.073002 | 33.076000 | 53.463001 |
| H  | 33.296001 | 31.100000 | 48.709999 |
| H  | 38.223000 | 31.534000 | 44.660999 |
| H  | 42.129002 | 32.450001 | 49.622002 |
| Fe | 37.654999 | 32.076000 | 49.111000 |
| C  | 36.282001 | 34.743999 | 49.721001 |
| C  | 36.129002 | 35.986000 | 48.935001 |
| C  | 37.009998 | 37.092999 | 49.014000 |
| C  | 36.664001 | 38.316002 | 48.379002 |
| C  | 38.216000 | 37.030998 | 49.758999 |
| C  | 37.459999 | 39.439999 | 48.539001 |
| C  | 39.015999 | 38.152000 | 49.882999 |
| C  | 38.637001 | 39.362999 | 49.292000 |
| H  | 36.768002 | 34.910999 | 50.688000 |
| H  | 35.313999 | 34.262001 | 49.886002 |
| H  | 35.304001 | 36.043999 | 48.229000 |
| H  | 35.751999 | 38.363998 | 47.790001 |
| H  | 38.539001 | 36.091999 | 50.189999 |
| H  | 37.181999 | 40.377998 | 48.063999 |
| H  | 39.952000 | 38.076000 | 50.419998 |
| H  | 39.278000 | 40.234001 | 49.395000 |
| O  | 37.105000 | 34.033001 | 48.819000 |

aMOx-2-S<sup>d</sup>

|    |           |           |           |
|----|-----------|-----------|-----------|
| S  | 38.115002 | 29.764999 | 49.139999 |
| C  | 38.897999 | 29.246000 | 50.709000 |
| H  | 39.351002 | 28.261999 | 50.534000 |
| H  | 39.680000 | 29.943001 | 51.007000 |
| N  | 36.360001 | 32.272999 | 50.272999 |
| N  | 36.716999 | 31.757999 | 47.514999 |
| N  | 39.504002 | 32.221001 | 47.832001 |
| C  | 35.004002 | 32.567001 | 52.146999 |
| N  | 39.133999 | 32.549000 | 50.624001 |
| C  | 34.196999 | 32.194000 | 51.123001 |
| C  | 36.344002 | 32.604000 | 51.623001 |
| C  | 37.455002 | 32.909000 | 52.386002 |
| C  | 35.032001 | 31.997999 | 49.959000 |
| C  | 34.588001 | 31.611000 | 48.706001 |
| C  | 35.365002 | 31.528000 | 47.549000 |
| C  | 34.841000 | 31.237000 | 46.222000 |
| C  | 35.928001 | 31.337999 | 45.395000 |
| C  | 37.084000 | 31.639999 | 46.192001 |
| C  | 38.372002 | 31.806999 | 45.701000 |
| C  | 39.505001 | 32.054001 | 46.464001 |
| C  | 40.851002 | 32.062000 | 45.919998 |
| C  | 41.657001 | 32.185001 | 47.019001 |
| C  | 40.833000 | 32.284000 | 48.195000 |
| C  | 41.305000 | 32.435001 | 49.495998 |
| C  | 40.516998 | 32.624001 | 50.617001 |
| C  | 40.997002 | 32.998001 | 51.932999 |
| C  | 38.756001 | 32.868999 | 51.916000 |
| C  | 39.911999 | 33.172001 | 52.723000 |
| H  | 37.299999 | 33.179001 | 53.423000 |
| H  | 33.523998 | 31.417999 | 48.603001 |
| H  | 38.513000 | 31.688000 | 44.632000 |
| H  | 42.377998 | 32.450001 | 49.640999 |
| Fe | 37.945999 | 31.992001 | 49.108002 |
| C  | 37.744999 | 35.776001 | 50.410000 |
| C  | 37.637001 | 37.099998 | 49.777000 |
| C  | 36.370998 | 37.875999 | 49.768002 |
| C  | 36.417000 | 39.258999 | 49.978001 |
| C  | 35.129002 | 37.247002 | 49.613998 |
| C  | 35.237999 | 40.000999 | 50.060001 |
| C  | 33.956001 | 37.987999 | 49.712002 |
| C  | 34.004002 | 39.366001 | 49.931999 |
| H  | 38.688999 | 35.448002 | 50.830002 |
| H  | 36.855999 | 35.324001 | 50.841000 |
| H  | 38.541000 | 37.709999 | 49.721001 |
| H  | 37.381001 | 39.756001 | 50.075001 |
| H  | 35.085999 | 36.182999 | 49.404999 |
| H  | 35.278999 | 41.074001 | 50.223999 |
| H  | 32.999001 | 37.491001 | 49.620998 |
| H  | 33.088001 | 39.943001 | 49.981998 |
| O  | 37.705002 | 35.889999 | 48.980000 |

aMOx-2-S<sup>a</sup>

|    |           |           |           |
|----|-----------|-----------|-----------|
| S  | 38.125999 | 29.540001 | 49.124001 |
| C  | 38.936001 | 29.063999 | 50.698002 |
| H  | 39.387001 | 28.072001 | 50.582001 |
| H  | 39.715000 | 29.777000 | 50.965000 |
| N  | 36.362999 | 32.221001 | 50.292000 |
| N  | 36.728001 | 31.757000 | 47.523998 |
| N  | 39.530998 | 32.191002 | 47.838001 |
| C  | 35.013000 | 32.515999 | 52.166000 |
| N  | 39.148998 | 32.507999 | 50.627998 |
| C  | 34.201000 | 32.174999 | 51.133999 |
| C  | 36.355000 | 32.535000 | 51.644001 |
| C  | 37.467999 | 32.833000 | 52.405998 |
| C  | 35.034000 | 31.985001 | 49.969002 |
| C  | 34.584999 | 31.628000 | 48.707001 |
| C  | 35.368999 | 31.547001 | 47.556000 |
| C  | 34.853001 | 31.259001 | 46.230000 |
| C  | 35.945999 | 31.340000 | 45.407001 |
| C  | 37.103001 | 31.629999 | 46.202000 |
| C  | 38.391998 | 31.781000 | 45.709000 |
| C  | 39.525002 | 32.029999 | 46.472000 |
| C  | 40.869999 | 32.051998 | 45.924000 |
| C  | 41.679001 | 32.192001 | 47.019001 |
| C  | 40.858002 | 32.278999 | 48.196999 |
| C  | 41.330002 | 32.435001 | 49.495998 |
| C  | 40.534000 | 32.605999 | 50.616001 |
| C  | 41.006001 | 32.983002 | 51.930000 |
| C  | 38.765999 | 32.814999 | 51.924999 |
| C  | 39.917999 | 33.133999 | 52.724998 |
| H  | 37.317001 | 33.092999 | 53.445000 |
| H  | 33.520000 | 31.451000 | 48.597000 |
| H  | 38.532001 | 31.659000 | 44.641998 |
| H  | 42.402000 | 32.464001 | 49.640999 |
| Fe | 37.959000 | 31.931000 | 49.109001 |
| C  | 37.028999 | 35.523998 | 50.195999 |
| C  | 37.165001 | 36.924999 | 49.777000 |
| C  | 36.062000 | 37.915001 | 49.808998 |
| C  | 36.394001 | 39.256001 | 50.025002 |
| C  | 34.714001 | 37.553001 | 49.674000 |
| C  | 35.396999 | 40.221001 | 50.131001 |
| C  | 33.719002 | 38.518002 | 49.803001 |
| C  | 34.058998 | 39.853001 | 50.029999 |
| H  | 37.894001 | 35.009998 | 50.601002 |
| H  | 36.060001 | 35.153999 | 50.518002 |
| H  | 38.153000 | 37.376999 | 49.865002 |
| H  | 37.441002 | 39.543999 | 50.102001 |
| H  | 34.446999 | 36.523998 | 49.457001 |
| H  | 35.657001 | 41.261002 | 50.299000 |
| H  | 32.672001 | 38.247002 | 49.733002 |
| H  | 33.289001 | 40.606998 | 50.112999 |
| O  | 37.099998 | 35.849998 | 48.801998 |

aMOx-2-R<sup>d</sup>

|    |           |           |           |
|----|-----------|-----------|-----------|
| S  | 38.125000 | 29.778000 | 49.152000 |
| C  | 38.907001 | 29.280001 | 50.727001 |
| H  | 39.369999 | 28.299999 | 50.558998 |
| H  | 39.680000 | 29.987000 | 51.022999 |
| N  | 36.308998 | 32.216999 | 50.285000 |
| N  | 36.673000 | 31.714001 | 47.523998 |
| N  | 39.458000 | 32.222000 | 47.834000 |
| C  | 34.950001 | 32.515999 | 52.153000 |
| N  | 39.077999 | 32.589001 | 50.617001 |
| C  | 34.151001 | 32.104000 | 51.139000 |
| C  | 36.286999 | 32.587002 | 51.622002 |
| C  | 37.390999 | 32.958000 | 52.367001 |
| C  | 34.990002 | 31.906000 | 49.977001 |
| C  | 34.550999 | 31.504000 | 48.724998 |
| C  | 35.328999 | 31.436001 | 47.564999 |
| C  | 34.814999 | 31.099001 | 46.247002 |
| C  | 35.900002 | 31.207001 | 45.417000 |
| C  | 37.046001 | 31.569000 | 46.205002 |
| C  | 38.332001 | 31.754000 | 45.710999 |
| C  | 39.462002 | 32.030998 | 46.469002 |
| C  | 40.810001 | 32.035000 | 45.928001 |
| C  | 41.612999 | 32.175999 | 47.028999 |
| C  | 40.785000 | 32.291000 | 48.200001 |
| C  | 41.254002 | 32.459999 | 49.500999 |
| C  | 40.459000 | 32.667000 | 50.613998 |
| C  | 40.933998 | 33.067001 | 51.925999 |
| C  | 38.692001 | 32.938000 | 51.896000 |
| C  | 39.844002 | 33.257999 | 52.705002 |
| H  | 37.231998 | 33.250999 | 53.396000 |
| H  | 33.493000 | 31.284000 | 48.625999 |
| H  | 38.477001 | 31.610001 | 44.646000 |
| H  | 42.326000 | 32.478001 | 49.650002 |
| Fe | 37.897999 | 32.002998 | 49.112000 |
| C  | 35.728001 | 35.272999 | 49.188000 |
| C  | 36.722000 | 36.174000 | 48.583000 |
| C  | 36.997002 | 37.541000 | 49.101002 |
| C  | 37.125999 | 38.612000 | 48.213001 |
| C  | 37.132000 | 37.765999 | 50.473000 |
| C  | 37.355000 | 39.900002 | 48.695000 |
| C  | 37.337002 | 39.054001 | 50.956001 |
| C  | 37.449001 | 40.125999 | 50.068001 |
| H  | 35.176998 | 35.613998 | 50.063000 |
| H  | 35.230000 | 34.522999 | 48.580002 |
| H  | 36.946999 | 36.042000 | 47.526001 |
| H  | 37.062000 | 38.433998 | 47.143002 |
| H  | 37.103001 | 36.915001 | 51.139000 |
| H  | 37.474998 | 40.722000 | 47.993999 |
| H  | 37.424999 | 39.230000 | 52.025002 |
| H  | 37.618000 | 41.129002 | 50.452999 |
| O  | 37.129002 | 35.055000 | 49.410999 |

aMOx-2-R<sup>a</sup>

|    |           |           |           |
|----|-----------|-----------|-----------|
| S  | 38.104000 | 29.500000 | 49.118000 |
| C  | 38.918999 | 29.068001 | 50.700001 |
| H  | 39.379002 | 28.077999 | 50.605999 |
| H  | 39.689999 | 29.795000 | 50.953999 |
| N  | 36.241001 | 32.182999 | 50.212002 |
| N  | 36.653999 | 31.614000 | 47.470001 |
| N  | 39.446999 | 32.111000 | 47.803001 |
| C  | 34.872002 | 32.499001 | 52.066002 |
| N  | 39.021000 | 32.528999 | 50.564999 |
| C  | 34.077000 | 32.098000 | 51.042999 |
| C  | 36.214001 | 32.551998 | 51.546001 |
| C  | 37.313999 | 32.904999 | 52.304001 |
| C  | 34.924000 | 31.891001 | 49.888000 |
| C  | 34.500000 | 31.472000 | 48.636002 |
| C  | 35.300999 | 31.358999 | 47.497002 |
| C  | 34.813999 | 30.982000 | 46.183998 |
| C  | 35.919998 | 31.044001 | 45.372002 |
| C  | 37.055000 | 31.417000 | 46.162998 |
| C  | 38.346001 | 31.591000 | 45.679001 |
| C  | 39.462002 | 31.906000 | 46.443001 |
| C  | 40.813999 | 31.945000 | 45.910999 |
| C  | 41.604000 | 32.124001 | 47.014999 |
| C  | 40.764999 | 32.228001 | 48.178001 |
| C  | 41.219002 | 32.419998 | 49.479000 |
| C  | 40.404999 | 32.619999 | 50.578999 |
| C  | 40.855999 | 33.019001 | 51.893002 |
| C  | 38.618000 | 32.875000 | 51.845001 |
| C  | 39.757000 | 33.198002 | 52.661999 |
| H  | 37.148998 | 33.198002 | 53.333000 |
| H  | 33.443001 | 31.252001 | 48.523998 |
| H  | 38.505001 | 31.426001 | 44.619999 |
| H  | 42.290001 | 32.453999 | 49.638000 |
| Fe | 37.862999 | 31.884001 | 49.063000 |
| C  | 35.515999 | 35.426998 | 49.224998 |
| C  | 36.358002 | 36.424000 | 48.561001 |
| C  | 36.548000 | 37.820000 | 49.049999 |
| C  | 35.512001 | 38.542999 | 49.648998 |
| C  | 37.803001 | 38.423000 | 48.880001 |
| C  | 35.737000 | 39.841999 | 50.106998 |
| C  | 38.035999 | 39.708000 | 49.360001 |
| C  | 37.005001 | 40.411999 | 49.983002 |
| H  | 34.980000 | 35.693001 | 50.133999 |
| H  | 35.077999 | 34.616001 | 48.650002 |
| H  | 36.562000 | 36.293999 | 47.498001 |
| H  | 34.523998 | 38.099998 | 49.743000 |
| H  | 38.598999 | 37.887001 | 48.375000 |
| H  | 34.924000 | 40.407001 | 50.556000 |
| H  | 39.015999 | 40.160999 | 49.237999 |
| H  | 37.194000 | 41.409000 | 50.368999 |
| O  | 36.945999 | 35.365002 | 49.376999 |

aMOx-Int2<sup>d</sup>

|    |           |           |           |
|----|-----------|-----------|-----------|
| S  | 38.043999 | 29.962999 | 49.243000 |
| C  | 38.897999 | 29.344999 | 50.743000 |
| H  | 39.342999 | 28.371000 | 50.506001 |
| H  | 39.686001 | 30.028000 | 51.056000 |
| N  | 36.376999 | 32.317001 | 50.459000 |
| N  | 36.722000 | 31.927000 | 47.645000 |
| N  | 39.563999 | 32.257000 | 47.963001 |
| C  | 35.042000 | 32.603001 | 52.334000 |
| N  | 39.200001 | 32.550999 | 50.794998 |
| C  | 34.224998 | 32.284000 | 51.303001 |
| C  | 36.384998 | 32.629002 | 51.801998 |
| C  | 37.511002 | 32.919998 | 52.555000 |
| C  | 35.057999 | 32.108002 | 50.126999 |
| C  | 34.599998 | 31.788000 | 48.854000 |
| C  | 35.374001 | 31.698000 | 47.694000 |
| C  | 34.851002 | 31.344000 | 46.377998 |
| C  | 35.941002 | 31.391001 | 45.553001 |
| C  | 37.099998 | 31.733000 | 46.341999 |
| C  | 38.396999 | 31.846001 | 45.848000 |
| C  | 39.548000 | 32.070000 | 46.604000 |
| C  | 40.897999 | 32.063000 | 46.051998 |
| C  | 41.708000 | 32.205002 | 47.146000 |
| C  | 40.886002 | 32.319000 | 48.327999 |
| C  | 41.355000 | 32.472000 | 49.631001 |
| C  | 40.570000 | 32.631001 | 50.769001 |
| C  | 41.063000 | 32.993999 | 52.089001 |
| C  | 38.817001 | 32.875000 | 52.083000 |
| C  | 39.984001 | 33.167000 | 52.887001 |
| H  | 37.362999 | 33.187000 | 53.592999 |
| H  | 33.532001 | 31.620001 | 48.748001 |
| H  | 38.534000 | 31.688999 | 44.784000 |
| H  | 42.426998 | 32.502998 | 49.773998 |
| Fe | 37.958000 | 32.247002 | 49.236000 |
| C  | 38.527000 | 35.112000 | 49.775002 |
| C  | 38.122002 | 36.492001 | 49.948002 |
| C  | 36.852001 | 37.085999 | 49.743999 |
| C  | 36.682999 | 38.470001 | 50.029999 |
| C  | 35.729000 | 36.331001 | 49.306999 |
| C  | 35.443001 | 39.070000 | 49.894001 |
| C  | 34.484001 | 36.939999 | 49.209999 |
| C  | 34.337002 | 38.301998 | 49.494999 |
| H  | 39.608002 | 35.098000 | 49.512001 |
| H  | 38.629002 | 34.855000 | 50.882999 |
| H  | 38.904999 | 37.131001 | 50.354000 |
| H  | 37.542999 | 39.055000 | 50.347000 |
| H  | 35.873001 | 35.283001 | 49.071999 |
| H  | 35.319000 | 40.131001 | 50.098999 |
| H  | 33.632000 | 36.358002 | 48.887001 |
| H  | 33.362999 | 38.778000 | 49.397999 |
| O  | 37.759998 | 34.241001 | 49.084999 |

aMOx-Int2<sup>a</sup>

|    |           |           |           |
|----|-----------|-----------|-----------|
| S  | 38.067001 | 29.702999 | 49.168999 |
| C  | 38.923000 | 29.159000 | 50.699001 |
| H  | 39.368999 | 28.169001 | 50.544998 |
| H  | 39.710999 | 29.862000 | 50.971001 |
| N  | 36.347000 | 32.300999 | 50.400002 |
| N  | 36.707001 | 31.900000 | 47.598999 |
| N  | 39.556000 | 32.236000 | 47.905998 |
| C  | 35.019001 | 32.588001 | 52.279999 |
| N  | 39.181000 | 32.528999 | 50.731998 |
| C  | 34.198002 | 32.268002 | 51.251999 |
| C  | 36.361000 | 32.610001 | 51.743999 |
| C  | 37.487999 | 32.901001 | 52.493000 |
| C  | 35.026001 | 32.092999 | 50.074001 |
| C  | 34.570999 | 31.773001 | 48.799999 |
| C  | 35.353001 | 31.681000 | 47.646000 |
| C  | 34.838001 | 31.332001 | 46.331001 |
| C  | 35.933998 | 31.372000 | 45.507000 |
| C  | 37.091000 | 31.704000 | 46.292999 |
| C  | 38.388000 | 31.813000 | 45.796001 |
| C  | 39.539001 | 32.040001 | 46.547001 |
| C  | 40.889000 | 32.032001 | 45.997002 |
| C  | 41.699001 | 32.180000 | 47.091000 |
| C  | 40.879002 | 32.299000 | 48.271000 |
| C  | 41.347000 | 32.453999 | 49.574001 |
| C  | 40.556000 | 32.616001 | 50.706001 |
| C  | 41.040001 | 32.985001 | 52.021000 |
| C  | 38.793999 | 32.855999 | 52.016998 |
| C  | 39.957001 | 33.153000 | 52.819000 |
| H  | 37.344002 | 33.166000 | 53.532001 |
| H  | 33.504002 | 31.606001 | 48.688999 |
| H  | 38.521999 | 31.653999 | 44.731998 |
| H  | 42.417999 | 32.484001 | 49.719002 |
| Fe | 37.939999 | 32.207001 | 49.174000 |
| C  | 38.486000 | 35.305000 | 49.787998 |
| C  | 38.112000 | 36.692001 | 49.998001 |
| C  | 36.859001 | 37.313000 | 49.770000 |
| C  | 36.692001 | 38.693001 | 50.075001 |
| C  | 35.743999 | 36.576000 | 49.285000 |
| C  | 35.460999 | 39.304001 | 49.915001 |
| C  | 34.507000 | 37.198002 | 49.160000 |
| C  | 34.362000 | 38.554001 | 49.466000 |
| H  | 39.564999 | 35.314999 | 49.500999 |
| H  | 38.641998 | 35.034000 | 50.890999 |
| H  | 38.897999 | 37.299999 | 50.445000 |
| H  | 37.546001 | 39.264999 | 50.430000 |
| H  | 35.891998 | 35.529999 | 49.041000 |
| H  | 35.338001 | 40.362000 | 50.136002 |
| H  | 33.660000 | 36.627998 | 48.801998 |
| H  | 33.394001 | 39.037998 | 49.351002 |
| O  | 37.719002 | 34.438999 | 49.124001 |

aMOx-TS3-cis-re<sup>d</sup>

|    |           |           |           |
|----|-----------|-----------|-----------|
| S  | 38.061001 | 29.948999 | 49.231998 |
| C  | 38.901001 | 29.343000 | 50.743000 |
| H  | 39.348999 | 28.368000 | 50.513000 |
| H  | 39.687000 | 30.027000 | 51.056999 |
| N  | 36.374001 | 32.297001 | 50.438000 |
| N  | 36.722000 | 31.898001 | 47.629002 |
| N  | 39.558998 | 32.255001 | 47.946999 |
| C  | 35.035999 | 32.591999 | 52.310001 |
| N  | 39.193001 | 32.548000 | 50.776001 |
| C  | 34.222000 | 32.249001 | 51.284000 |
| C  | 36.377998 | 32.629002 | 51.777000 |
| C  | 37.500999 | 32.944000 | 52.522999 |
| C  | 35.056000 | 32.069000 | 50.110001 |
| C  | 34.601002 | 31.738001 | 48.838001 |
| C  | 35.375000 | 31.660000 | 47.676998 |
| C  | 34.854000 | 31.313000 | 46.359001 |
| C  | 35.943001 | 31.375999 | 45.533001 |
| C  | 37.099998 | 31.719000 | 46.323002 |
| C  | 38.396000 | 31.846001 | 45.828999 |
| C  | 39.544998 | 32.070999 | 46.585999 |
| C  | 40.894001 | 32.064999 | 46.035000 |
| C  | 41.702999 | 32.201000 | 47.132000 |
| C  | 40.881001 | 32.312000 | 48.313000 |
| C  | 41.352001 | 32.458000 | 49.618000 |
| C  | 40.567001 | 32.622002 | 50.751999 |
| C  | 41.056999 | 32.991001 | 52.070999 |
| C  | 38.810001 | 32.887001 | 52.054001 |
| C  | 39.976002 | 33.178001 | 52.862999 |
| H  | 37.351002 | 33.224998 | 53.556999 |
| H  | 33.535000 | 31.561001 | 48.731998 |
| H  | 38.533001 | 31.697001 | 44.764000 |
| H  | 42.424000 | 32.487000 | 49.759998 |
| Fe | 37.955002 | 32.222000 | 49.219002 |
| C  | 38.480999 | 35.111000 | 49.755001 |
| C  | 38.103001 | 36.486000 | 49.963001 |
| C  | 36.826000 | 37.098999 | 49.792000 |
| C  | 36.683998 | 38.477001 | 50.101002 |
| C  | 35.696999 | 36.380001 | 49.323002 |
| C  | 35.463001 | 39.112999 | 49.943001 |
| C  | 34.470001 | 37.021999 | 49.207001 |
| C  | 34.348000 | 38.382000 | 49.507999 |
| H  | 39.575001 | 34.985001 | 49.683998 |
| H  | 38.366001 | 35.058998 | 50.936001 |
| H  | 38.895000 | 37.096001 | 50.394001 |
| H  | 37.549999 | 39.036999 | 50.446999 |
| H  | 35.813000 | 35.332001 | 49.077999 |
| H  | 35.362999 | 40.174000 | 50.160999 |
| H  | 33.612000 | 36.464001 | 48.858002 |
| H  | 33.387001 | 38.882000 | 49.396999 |
| O  | 37.723999 | 34.245998 | 49.090000 |

aMOx-TS3-cis-re<sup>d</sup>

|    |           |           |           |
|----|-----------|-----------|-----------|
| S  | 38.074001 | 29.705999 | 49.162998 |
| C  | 38.924999 | 29.167999 | 50.699001 |
| H  | 39.373001 | 28.179001 | 50.546001 |
| H  | 39.710999 | 29.872999 | 50.972000 |
| N  | 36.334000 | 32.297001 | 50.393002 |
| N  | 36.699001 | 31.899000 | 47.595001 |
| N  | 39.541000 | 32.264999 | 47.905998 |
| C  | 35.001999 | 32.582001 | 52.269001 |
| N  | 39.160999 | 32.547001 | 50.726002 |
| C  | 34.185001 | 32.241001 | 51.243999 |
| C  | 36.342999 | 32.619999 | 51.733002 |
| C  | 37.466999 | 32.930000 | 52.480000 |
| C  | 35.014000 | 32.070000 | 50.067001 |
| C  | 34.563999 | 31.745001 | 48.794998 |
| C  | 35.346001 | 31.670000 | 47.639000 |
| C  | 34.832001 | 31.340000 | 46.320000 |
| C  | 35.925999 | 31.405001 | 45.494999 |
| C  | 37.082001 | 31.730000 | 46.285000 |
| C  | 38.376999 | 31.858999 | 45.789001 |
| C  | 39.526001 | 32.082001 | 46.542999 |
| C  | 40.875999 | 32.071999 | 45.995998 |
| C  | 41.685001 | 32.205002 | 47.094002 |
| C  | 40.863998 | 32.317001 | 48.272999 |
| C  | 41.332001 | 32.457001 | 49.577999 |
| C  | 40.540001 | 32.620998 | 50.706001 |
| C  | 41.020000 | 32.981998 | 52.023998 |
| C  | 38.772999 | 32.876999 | 52.007999 |
| C  | 39.935001 | 33.165001 | 52.814999 |
| H  | 37.319000 | 33.201000 | 53.516998 |
| H  | 33.499001 | 31.568001 | 48.681999 |
| H  | 38.512001 | 31.715000 | 44.723000 |
| H  | 42.403999 | 32.477001 | 49.726002 |
| Fe | 37.928001 | 32.191002 | 49.173000 |
| C  | 38.426998 | 35.341999 | 49.763000 |
| C  | 38.083000 | 36.726002 | 49.997002 |
| C  | 36.808998 | 37.359001 | 49.831001 |
| C  | 36.675999 | 38.733002 | 50.150002 |
| C  | 35.681999 | 36.658001 | 49.334999 |
| C  | 35.463001 | 39.383999 | 49.976002 |
| C  | 34.464001 | 37.313999 | 49.199001 |
| C  | 34.348999 | 38.671001 | 49.512001 |
| H  | 39.516998 | 35.174999 | 49.722000 |
| H  | 38.290001 | 35.347000 | 50.955002 |
| H  | 38.888000 | 37.313999 | 50.437000 |
| H  | 37.540001 | 39.283001 | 50.514000 |
| H  | 35.794998 | 35.610001 | 49.084999 |
| H  | 35.370998 | 40.444000 | 50.202999 |
| H  | 33.608002 | 36.766998 | 48.827999 |
| H  | 33.395000 | 39.180000 | 49.389999 |
| O  | 37.647999 | 34.478001 | 49.138000 |

aMOx-TS3-trans-si<sup>a</sup>

|    |           |           |           |
|----|-----------|-----------|-----------|
| S  | 38.073002 | 29.952000 | 49.242001 |
| C  | 38.905998 | 29.340000 | 50.752998 |
| H  | 39.348999 | 28.363001 | 50.521999 |
| H  | 39.695000 | 30.020000 | 51.070000 |
| N  | 36.408001 | 32.324001 | 50.445000 |
| N  | 36.754002 | 31.907000 | 47.633999 |
| N  | 39.592999 | 32.234001 | 47.955002 |
| C  | 35.070999 | 32.612999 | 52.319000 |
| N  | 39.224998 | 32.535000 | 50.791000 |
| C  | 34.252998 | 32.301998 | 51.285000 |
| C  | 36.415001 | 32.631001 | 51.789001 |
| C  | 37.542000 | 32.902000 | 52.549000 |
| C  | 35.087002 | 32.117001 | 50.112000 |
| C  | 34.630001 | 31.787001 | 48.841999 |
| C  | 35.404999 | 31.683001 | 47.683998 |
| C  | 34.882999 | 31.316999 | 46.372002 |
| C  | 35.976002 | 31.351000 | 45.547001 |
| C  | 37.132999 | 31.697001 | 46.332001 |
| C  | 38.431999 | 31.802999 | 45.839001 |
| C  | 39.580002 | 32.035999 | 46.595001 |
| C  | 40.929001 | 32.035999 | 46.046001 |
| C  | 41.737000 | 32.191002 | 47.140999 |
| C  | 40.914001 | 32.306999 | 48.320999 |
| C  | 41.382999 | 32.465000 | 49.625999 |
| C  | 40.602001 | 32.616001 | 50.763000 |
| C  | 41.091999 | 32.979000 | 52.083000 |
| C  | 38.846001 | 32.841999 | 52.081001 |
| C  | 40.011002 | 33.133999 | 52.883999 |
| H  | 37.393002 | 33.164001 | 53.588001 |
| H  | 33.562000 | 31.618999 | 48.737000 |
| H  | 38.570000 | 31.636000 | 44.777000 |
| H  | 42.455002 | 32.505001 | 49.764999 |
| Fe | 37.990002 | 32.222000 | 49.227001 |
| C  | 38.537998 | 35.155998 | 49.723999 |
| C  | 38.085999 | 36.481998 | 50.075001 |
| C  | 36.848999 | 37.117001 | 49.758999 |
| C  | 36.696999 | 38.502998 | 50.027000 |
| C  | 35.731998 | 36.375000 | 49.299000 |
| C  | 35.467999 | 39.119999 | 49.859001 |
| C  | 34.500000 | 37.001999 | 49.158001 |
| C  | 34.363998 | 38.367001 | 49.431000 |
| H  | 39.273998 | 35.770000 | 49.029999 |
| H  | 39.285000 | 34.765999 | 50.430000 |
| H  | 38.848999 | 37.088001 | 50.562000 |
| H  | 37.555000 | 39.076000 | 50.367001 |
| H  | 35.862000 | 35.323002 | 49.077000 |
| H  | 35.355000 | 40.182999 | 50.056999 |
| H  | 33.647999 | 36.429001 | 48.817001 |
| H  | 33.398998 | 38.855000 | 49.307999 |
| O  | 37.793999 | 34.277000 | 49.071999 |

aMOx-TS3-trans-si<sup>a</sup>

|    |           |           |           |
|----|-----------|-----------|-----------|
| S  | 38.069000 | 29.701000 | 49.167999 |
| C  | 38.923000 | 29.155001 | 50.699001 |
| H  | 39.366001 | 28.164000 | 50.542999 |
| H  | 39.712002 | 29.856001 | 50.971001 |
| N  | 36.352001 | 32.308998 | 50.405998 |
| N  | 36.713001 | 31.907000 | 47.606998 |
| N  | 39.558998 | 32.238998 | 47.917999 |
| C  | 35.021999 | 32.591000 | 52.285000 |
| N  | 39.181000 | 32.518002 | 50.745998 |
| C  | 34.201000 | 32.278999 | 51.254002 |
| C  | 36.365002 | 32.608002 | 51.751999 |
| C  | 37.492001 | 32.879002 | 52.507999 |
| C  | 35.028999 | 32.105000 | 50.077000 |
| C  | 34.574001 | 31.787001 | 48.804001 |
| C  | 35.358002 | 31.691000 | 47.651001 |
| C  | 34.844002 | 31.343000 | 46.337002 |
| C  | 35.941002 | 31.381001 | 45.514000 |
| C  | 37.098000 | 31.709999 | 46.299999 |
| C  | 38.394001 | 31.819000 | 45.805000 |
| C  | 39.543999 | 32.046001 | 46.557999 |
| C  | 40.893002 | 32.041000 | 46.008999 |
| C  | 41.702000 | 32.188000 | 47.104000 |
| C  | 40.882000 | 32.303001 | 48.284000 |
| C  | 41.348999 | 32.453999 | 49.588001 |
| C  | 40.558998 | 32.605999 | 50.720001 |
| C  | 41.041000 | 32.967999 | 52.035999 |
| C  | 38.796001 | 32.826000 | 52.035999 |
| C  | 39.958000 | 33.123001 | 52.837002 |
| H  | 37.346001 | 33.137001 | 53.549000 |
| H  | 33.507000 | 31.622000 | 48.692001 |
| H  | 38.528999 | 31.660000 | 44.741001 |
| H  | 42.419998 | 32.486000 | 49.733002 |
| Fe | 37.945000 | 32.193001 | 49.186001 |
| C  | 38.480000 | 35.348000 | 49.801998 |
| C  | 38.056999 | 36.691002 | 50.146000 |
| C  | 36.840000 | 37.346001 | 49.810001 |
| C  | 36.681000 | 38.727001 | 50.102001 |
| C  | 35.735001 | 36.618000 | 49.296001 |
| C  | 35.459999 | 39.349998 | 49.908001 |
| C  | 34.508999 | 37.250999 | 49.130001 |
| C  | 34.367001 | 38.609001 | 49.430000 |
| H  | 39.328999 | 35.841000 | 49.168999 |
| H  | 39.132000 | 34.938000 | 50.599998 |
| H  | 38.819000 | 37.277000 | 50.658001 |
| H  | 37.528999 | 39.292000 | 50.481998 |
| H  | 35.877998 | 35.570999 | 49.056000 |
| H  | 35.341000 | 40.409000 | 50.125000 |
| H  | 33.667000 | 36.688000 | 48.750999 |
| H  | 33.407001 | 39.101002 | 49.289001 |
| O  | 37.737999 | 34.484001 | 49.134998 |



aMOx-3<sup>a</sup>

|    |           |           |           |
|----|-----------|-----------|-----------|
| S  | 38.098000 | 29.900999 | 49.195000 |
| C  | 38.896000 | 29.322001 | 50.735001 |
| H  | 39.341999 | 28.344000 | 50.519001 |
| H  | 39.681999 | 30.004999 | 51.051998 |
| N  | 36.348000 | 32.258999 | 50.417999 |
| N  | 36.682999 | 31.851000 | 47.618999 |
| N  | 39.492001 | 32.290001 | 47.914001 |
| C  | 35.009998 | 32.561001 | 52.292000 |
| N  | 39.144001 | 32.549000 | 50.738998 |
| C  | 34.195000 | 32.203999 | 51.270000 |
| C  | 36.348999 | 32.595001 | 51.758999 |
| C  | 37.470001 | 32.910999 | 52.507000 |
| C  | 35.025002 | 32.012001 | 50.098999 |
| C  | 34.570000 | 31.659000 | 48.835999 |
| C  | 35.338001 | 31.596001 | 47.671001 |
| C  | 34.808998 | 31.271999 | 46.353001 |
| C  | 35.889000 | 31.372000 | 45.515999 |
| C  | 37.048000 | 31.709999 | 46.299999 |
| C  | 38.333000 | 31.871000 | 45.794998 |
| C  | 39.480999 | 32.108002 | 46.547001 |
| C  | 40.826000 | 32.105999 | 45.995998 |
| C  | 41.638000 | 32.234001 | 47.092999 |
| C  | 40.821999 | 32.338001 | 48.273998 |
| C  | 41.300999 | 32.474998 | 49.575001 |
| C  | 40.521999 | 32.636002 | 50.710999 |
| C  | 41.014999 | 33.012001 | 52.022999 |
| C  | 38.771000 | 32.869999 | 52.028999 |
| C  | 39.937000 | 33.178001 | 52.825001 |
| H  | 37.321999 | 33.187000 | 53.542999 |
| H  | 33.505001 | 31.472000 | 48.736000 |
| H  | 38.465000 | 31.740999 | 44.726002 |
| H  | 42.374001 | 32.500999 | 49.710999 |
| Fe | 37.915001 | 32.130001 | 49.203999 |
| C  | 38.279999 | 35.265999 | 49.771999 |
| C  | 37.995998 | 36.719002 | 50.022999 |
| C  | 36.619999 | 37.299000 | 49.773998 |
| C  | 36.519001 | 38.647999 | 49.404999 |
| C  | 35.439999 | 36.576000 | 50.000000 |
| C  | 35.273998 | 39.269001 | 49.298000 |
| C  | 34.195999 | 37.198002 | 49.889000 |
| C  | 34.105000 | 38.548000 | 49.546001 |
| H  | 39.273998 | 34.932999 | 50.095001 |
| H  | 38.316002 | 36.896000 | 51.062000 |
| H  | 38.758999 | 37.257000 | 49.433998 |
| H  | 37.423000 | 39.219002 | 49.201000 |
| H  | 35.486000 | 35.527000 | 50.263000 |
| H  | 35.216000 | 40.319000 | 49.020000 |
| H  | 33.292999 | 36.626999 | 50.077000 |
| H  | 33.136002 | 39.035000 | 49.464001 |
| O  | 37.529999 | 34.464001 | 49.222000 |

aMOx-3<sup>a</sup>

|    |           |           |           |
|----|-----------|-----------|-----------|
| S  | 38.094002 | 29.641001 | 49.119999 |
| C  | 38.912998 | 29.157000 | 50.688000 |
| H  | 39.375999 | 28.173000 | 50.556999 |
| H  | 39.686001 | 29.877001 | 50.959999 |
| N  | 36.342999 | 32.338001 | 50.235001 |
| N  | 36.720001 | 31.851000 | 47.471001 |
| N  | 39.525002 | 32.265999 | 47.785999 |
| C  | 34.995998 | 32.597000 | 52.115002 |
| N  | 39.131001 | 32.598000 | 50.577999 |
| C  | 34.188000 | 32.241001 | 51.087002 |
| C  | 36.334999 | 32.657001 | 51.583000 |
| C  | 37.445999 | 32.969002 | 52.340000 |
| C  | 35.020000 | 32.076000 | 49.916000 |
| C  | 34.574001 | 31.718000 | 48.653000 |
| C  | 35.360001 | 31.639000 | 47.502998 |
| C  | 34.847000 | 31.337999 | 46.180000 |
| C  | 35.942001 | 31.409000 | 45.356998 |
| C  | 37.098999 | 31.705000 | 46.150002 |
| C  | 38.389999 | 31.837000 | 45.657001 |
| C  | 39.528000 | 32.074001 | 46.418999 |
| C  | 40.876999 | 32.069000 | 45.883999 |
| C  | 41.680000 | 32.210999 | 46.987000 |
| C  | 40.853001 | 32.326000 | 48.157001 |
| C  | 41.316002 | 32.480999 | 49.459999 |
| C  | 40.514999 | 32.669998 | 50.571999 |
| C  | 40.988998 | 33.037998 | 51.887001 |
| C  | 38.745998 | 32.929001 | 51.865002 |
| C  | 39.901001 | 33.220001 | 52.674000 |
| H  | 37.293999 | 33.237000 | 53.377998 |
| H  | 33.511002 | 31.532000 | 48.542000 |
| H  | 38.529999 | 31.702000 | 44.591000 |
| H  | 42.387001 | 32.495998 | 49.613998 |
| Fe | 37.941002 | 32.035999 | 49.066002 |
| C  | 38.445999 | 36.492001 | 49.591999 |
| C  | 37.951000 | 37.782001 | 50.209999 |
| C  | 36.494999 | 38.158001 | 50.005001 |
| C  | 36.165001 | 39.509998 | 49.841999 |
| C  | 35.462002 | 37.209999 | 50.001999 |
| C  | 34.837002 | 39.910000 | 49.691002 |
| C  | 34.137001 | 37.610001 | 49.834999 |
| C  | 33.818001 | 38.958000 | 49.680000 |
| H  | 39.498001 | 36.507000 | 49.254002 |
| H  | 38.175999 | 37.675999 | 51.283001 |
| H  | 38.599998 | 38.592999 | 49.853001 |
| H  | 36.957001 | 40.257999 | 49.831001 |
| H  | 35.699001 | 36.160999 | 50.112999 |
| H  | 34.595001 | 40.964001 | 49.570000 |
| H  | 33.352001 | 36.861000 | 49.819000 |
| H  | 32.789001 | 39.266998 | 49.537998 |
| O  | 37.783001 | 35.473999 | 49.483002 |

**Table S16.** Cartesian coordinates (xyz, in Å) of the QM atoms of all QM/MM optimized stationary points reported in **Figure S23** and **Table S8**.

| aMOx-1 <sup>d</sup> |           |           |           | aMOx-1 <sup>e</sup> |           |           |           |
|---------------------|-----------|-----------|-----------|---------------------|-----------|-----------|-----------|
| S                   | 43.490002 | 26.382000 | 45.424000 | S                   | 43.445999 | 26.336000 | 45.437000 |
| C                   | 45.077000 | 25.757999 | 46.101002 | C                   | 45.028000 | 25.709000 | 46.118999 |
| H                   | 45.776001 | 25.563999 | 45.278999 | H                   | 45.734001 | 25.531000 | 45.299999 |
| H                   | 45.521000 | 26.493000 | 46.771000 | H                   | 45.465000 | 26.438999 | 46.799999 |
| N                   | 41.655998 | 25.926001 | 48.097000 | N                   | 41.627998 | 25.995001 | 48.069000 |
| N                   | 40.735001 | 27.379000 | 45.799000 | N                   | 40.737999 | 27.433001 | 45.754002 |
| N                   | 42.868999 | 29.278999 | 46.181000 | N                   | 42.893002 | 29.309000 | 46.130001 |
| C                   | 41.341999 | 24.334999 | 49.757999 | C                   | 41.321999 | 24.388000 | 49.715000 |
| N                   | 43.800999 | 27.760000 | 48.424999 | N                   | 43.794998 | 27.805000 | 48.393002 |
| C                   | 40.356998 | 24.153000 | 48.848000 | C                   | 40.332001 | 24.216999 | 48.807999 |
| C                   | 42.175999 | 25.402000 | 49.250999 | C                   | 42.153999 | 25.459000 | 49.216000 |
| C                   | 43.376999 | 25.802000 | 49.837002 | C                   | 43.358002 | 25.848000 | 49.799000 |
| C                   | 40.532001 | 25.165001 | 47.823002 | C                   | 40.502998 | 25.237000 | 47.791000 |
| C                   | 39.696999 | 25.375000 | 46.740002 | C                   | 39.669998 | 25.450001 | 46.706001 |
| C                   | 39.778999 | 26.409000 | 45.787998 | C                   | 39.770000 | 26.474001 | 45.747002 |
| C                   | 38.875000 | 26.563000 | 44.659000 | C                   | 38.879002 | 26.625999 | 44.606998 |
| C                   | 39.340000 | 27.670000 | 43.997002 | C                   | 39.365002 | 27.719000 | 43.936001 |
| C                   | 40.490002 | 28.172001 | 44.702000 | C                   | 40.514000 | 28.214001 | 44.645000 |
| C                   | 41.256001 | 29.278999 | 44.344002 | C                   | 41.294998 | 29.309000 | 44.280998 |
| C                   | 42.354000 | 29.804001 | 45.027000 | C                   | 42.388000 | 29.832001 | 44.970001 |
| C                   | 43.112999 | 30.959999 | 44.584000 | C                   | 43.150002 | 30.988001 | 44.533001 |
| C                   | 44.097000 | 31.094999 | 45.527000 | C                   | 44.123001 | 31.127001 | 45.487000 |
| C                   | 43.937000 | 30.059999 | 46.511002 | C                   | 43.955002 | 30.094000 | 46.471001 |
| C                   | 44.755001 | 29.870001 | 47.633999 | C                   | 44.761002 | 29.910000 | 47.604000 |
| C                   | 44.685001 | 28.816000 | 48.528000 | C                   | 44.681999 | 28.858999 | 48.500000 |
| C                   | 45.549000 | 28.632000 | 49.674999 | C                   | 45.542000 | 28.669001 | 49.651001 |
| C                   | 44.112999 | 26.922001 | 49.466999 | C                   | 44.101002 | 26.965000 | 49.432999 |
| C                   | 45.235001 | 27.436001 | 50.222000 | C                   | 45.224998 | 27.469999 | 50.191002 |
| H                   | 43.750000 | 25.212999 | 50.665001 | H                   | 43.729000 | 25.257000 | 50.625999 |
| H                   | 38.874001 | 24.677999 | 46.620998 | H                   | 38.841999 | 24.760000 | 46.588001 |
| H                   | 40.980000 | 29.792000 | 43.430000 | H                   | 41.029999 | 29.816000 | 43.359001 |
| H                   | 45.542999 | 30.594999 | 47.799999 | H                   | 45.544998 | 30.636000 | 47.777000 |
| Fe                  | 42.202999 | 27.643999 | 47.192001 | Fe                  | 42.200001 | 27.693001 | 47.150002 |
| C                   | 34.708000 | 28.843000 | 51.984001 | C                   | 34.719002 | 28.844000 | 51.974998 |
| C                   | 35.619999 | 29.818001 | 52.088001 | C                   | 35.631001 | 29.818001 | 52.087002 |
| C                   | 36.873001 | 29.966000 | 51.330002 | C                   | 36.884998 | 29.974001 | 51.332001 |
| C                   | 37.699001 | 31.075001 | 51.589001 | C                   | 37.707001 | 31.083000 | 51.598999 |
| C                   | 37.297001 | 29.044001 | 50.354000 | C                   | 37.311001 | 29.058001 | 50.352001 |
| C                   | 38.919998 | 31.238001 | 50.935001 | C                   | 38.929001 | 31.252001 | 50.948002 |
| C                   | 38.519001 | 29.198000 | 49.705002 | C                   | 38.533001 | 29.218000 | 49.705002 |
| C                   | 39.342999 | 30.290001 | 50.001999 | C                   | 39.355000 | 30.311001 | 50.009998 |
| H                   | 34.812000 | 28.000999 | 51.305000 | H                   | 34.823002 | 28.007999 | 51.289001 |
| H                   | 33.813999 | 28.858999 | 52.598000 | H                   | 33.824001 | 28.855000 | 52.587002 |
| H                   | 35.425999 | 30.613001 | 52.807999 | H                   | 35.435001 | 30.608000 | 52.813999 |
| H                   | 37.376999 | 31.813000 | 52.321999 | H                   | 37.382000 | 31.816000 | 52.334999 |
| H                   | 36.661999 | 28.200001 | 50.104000 | H                   | 36.678001 | 28.214001 | 50.096001 |
| H                   | 39.537998 | 32.104000 | 51.162998 | H                   | 39.543999 | 32.118000 | 51.181999 |
| H                   | 38.844002 | 28.466999 | 48.972000 | H                   | 38.861000 | 28.493999 | 48.966999 |
| H                   | 40.308998 | 30.379000 | 49.514999 | H                   | 40.320999 | 30.405001 | 49.522999 |
| O                   | 41.265999 | 28.552000 | 48.168999 | O                   | 41.276001 | 28.631001 | 48.112000 |

aMOx-TS1<sup>d</sup>

|    |           |           |           |
|----|-----------|-----------|-----------|
| S  | 43.455002 | 26.298000 | 45.442001 |
| C  | 45.035999 | 25.690001 | 46.139000 |
| H  | 45.745998 | 25.531000 | 45.319000 |
| H  | 45.458000 | 26.420000 | 46.828999 |
| N  | 41.618999 | 25.797001 | 48.078999 |
| N  | 40.710999 | 27.195000 | 45.737999 |
| N  | 42.785999 | 29.153000 | 46.151001 |
| C  | 41.341000 | 24.188999 | 49.726002 |
| N  | 43.691002 | 27.680000 | 48.431999 |
| C  | 40.355000 | 24.003000 | 48.813999 |
| C  | 42.155998 | 25.274000 | 49.236000 |
| C  | 43.333000 | 25.698000 | 49.837002 |
| C  | 40.514999 | 25.016001 | 47.792000 |
| C  | 39.676998 | 25.200001 | 46.701000 |
| C  | 39.747002 | 26.226000 | 45.754002 |
| C  | 38.814999 | 26.398001 | 44.648998 |
| C  | 39.270000 | 27.504999 | 43.981998 |
| C  | 40.442001 | 28.002001 | 44.660000 |
| C  | 41.183998 | 29.125000 | 44.299999 |
| C  | 42.259998 | 29.670000 | 44.995998 |
| C  | 42.986000 | 30.858999 | 44.574001 |
| C  | 43.958000 | 31.016001 | 45.523998 |
| C  | 43.827999 | 29.965000 | 46.498001 |
| C  | 44.644001 | 29.796000 | 47.618999 |
| C  | 44.574001 | 28.746000 | 48.516998 |
| C  | 45.445000 | 28.570000 | 49.658001 |
| C  | 44.035000 | 26.834999 | 49.469002 |
| C  | 45.154999 | 27.367001 | 50.208000 |
| H  | 43.716999 | 25.121000 | 50.667999 |
| H  | 38.865002 | 24.490999 | 46.588001 |
| H  | 40.897999 | 29.635000 | 43.388000 |
| H  | 45.431999 | 30.521999 | 47.779999 |
| Fe | 42.146999 | 27.489000 | 47.157001 |
| C  | 40.661999 | 28.569000 | 49.974998 |
| C  | 39.723000 | 29.568001 | 50.061001 |
| C  | 40.012001 | 30.975000 | 49.874001 |
| C  | 39.105000 | 31.962999 | 50.318001 |
| C  | 41.195999 | 31.398001 | 49.220001 |
| C  | 39.383999 | 33.314999 | 50.146999 |
| C  | 41.453999 | 32.750000 | 49.029999 |
| C  | 40.556999 | 33.713001 | 49.499001 |
| H  | 41.716000 | 28.783001 | 50.098000 |
| H  | 40.362999 | 27.538000 | 50.120998 |
| H  | 38.678001 | 29.301001 | 50.216999 |
| H  | 38.188000 | 31.658001 | 50.819000 |
| H  | 41.881001 | 30.656000 | 48.831001 |
| H  | 38.683998 | 34.061001 | 50.515999 |
| H  | 42.352001 | 33.063999 | 48.505001 |
| H  | 40.775002 | 34.759998 | 49.334999 |
| O  | 41.043999 | 28.434999 | 47.973999 |

aMOx-TS1<sup>a</sup>

|    |           |           |           |
|----|-----------|-----------|-----------|
| S  | 43.327999 | 26.358999 | 45.568001 |
| C  | 44.925999 | 25.764000 | 46.230000 |
| H  | 45.626999 | 25.646000 | 45.395000 |
| H  | 45.341999 | 26.481001 | 46.938000 |
| N  | 41.519001 | 26.025000 | 48.102001 |
| N  | 40.652000 | 27.448999 | 45.768002 |
| N  | 42.757000 | 29.349001 | 46.166000 |
| C  | 41.276001 | 24.368000 | 49.708000 |
| N  | 43.667000 | 27.865999 | 48.432999 |
| C  | 40.275002 | 24.205000 | 48.808998 |
| C  | 42.078999 | 25.469000 | 49.230000 |
| C  | 43.271000 | 25.875000 | 49.817001 |
| C  | 40.417000 | 25.250999 | 47.814999 |
| C  | 39.577999 | 25.461000 | 46.727001 |
| C  | 39.680000 | 26.479000 | 45.773998 |
| C  | 38.790001 | 26.627001 | 44.633999 |
| C  | 39.275002 | 27.712000 | 43.951000 |
| C  | 40.424000 | 28.219999 | 44.653000 |
| C  | 41.193001 | 29.320999 | 44.283001 |
| C  | 42.268002 | 29.855000 | 44.986000 |
| C  | 43.037998 | 31.007999 | 44.549000 |
| C  | 44.007000 | 31.152000 | 45.505001 |
| C  | 43.834000 | 30.132000 | 46.504002 |
| C  | 44.644001 | 29.957001 | 47.625000 |
| C  | 44.560001 | 28.910000 | 48.529999 |
| C  | 45.435001 | 28.711000 | 49.667000 |
| C  | 43.987999 | 27.009001 | 49.464001 |
| C  | 45.118999 | 27.511000 | 50.209999 |
| H  | 43.662998 | 25.275999 | 50.627998 |
| H  | 38.757999 | 24.761999 | 46.604000 |
| H  | 40.933998 | 29.816999 | 43.355000 |
| H  | 45.448002 | 30.667999 | 47.778000 |
| Fe | 42.088001 | 27.738001 | 47.152000 |
| C  | 40.508999 | 28.551001 | 49.980999 |
| C  | 39.236000 | 29.066000 | 50.152000 |
| C  | 38.928001 | 30.466999 | 50.366001 |
| C  | 37.745998 | 30.834000 | 51.048000 |
| C  | 39.787998 | 31.502001 | 49.931000 |
| C  | 37.464001 | 32.169998 | 51.321999 |
| C  | 39.491001 | 32.837002 | 50.186001 |
| C  | 38.332001 | 33.179001 | 50.889999 |
| H  | 41.374001 | 29.138000 | 50.266998 |
| H  | 40.637001 | 27.478001 | 50.009998 |
| H  | 38.389999 | 28.379999 | 50.143002 |
| H  | 37.074001 | 30.055000 | 51.404999 |
| H  | 40.678001 | 31.249001 | 49.362000 |
| H  | 36.574001 | 32.430000 | 51.894001 |
| H  | 40.160000 | 33.615002 | 49.828999 |
| H  | 38.105000 | 34.220001 | 51.101002 |
| O  | 41.081001 | 28.708000 | 48.108002 |

aMOx-Int1<sup>d</sup>

|    |           |           |           |
|----|-----------|-----------|-----------|
| S  | 43.484001 | 26.322001 | 45.464001 |
| C  | 45.069000 | 25.694000 | 46.138000 |
| H  | 45.766998 | 25.521999 | 45.311001 |
| H  | 45.507000 | 26.421000 | 46.820999 |
| N  | 41.657001 | 25.754999 | 48.099998 |
| N  | 40.688000 | 27.195999 | 45.783001 |
| N  | 42.752998 | 29.148001 | 46.181999 |
| C  | 41.366001 | 24.159000 | 49.762001 |
| N  | 43.709999 | 27.655001 | 48.459999 |
| C  | 40.375999 | 23.973000 | 48.855999 |
| C  | 42.187000 | 25.233000 | 49.252998 |
| C  | 43.375000 | 25.664000 | 49.848000 |
| C  | 40.540001 | 24.983000 | 47.827000 |
| C  | 39.692001 | 25.184000 | 46.749001 |
| C  | 39.741001 | 26.221001 | 45.799000 |
| C  | 38.793999 | 26.378000 | 44.702000 |
| C  | 39.229000 | 27.493000 | 44.033001 |
| C  | 40.397999 | 28.000999 | 44.708000 |
| C  | 41.133999 | 29.129999 | 44.354000 |
| C  | 42.223999 | 29.674999 | 45.037998 |
| C  | 42.955002 | 30.857000 | 44.605999 |
| C  | 43.941002 | 31.002001 | 45.546001 |
| C  | 43.808998 | 29.947001 | 46.515999 |
| C  | 44.637001 | 29.767000 | 47.632999 |
| C  | 44.583000 | 28.722000 | 48.542000 |
| C  | 45.462002 | 28.561001 | 49.683998 |
| C  | 44.067001 | 26.813999 | 49.493000 |
| C  | 45.181000 | 27.360001 | 50.237999 |
| H  | 43.766998 | 25.080000 | 50.672001 |
| H  | 38.877998 | 24.475000 | 46.641998 |
| H  | 40.837002 | 29.648001 | 43.449001 |
| H  | 45.426998 | 30.495001 | 47.783001 |
| Fe | 42.186001 | 27.438000 | 47.140999 |
| C  | 40.825001 | 28.334000 | 49.534000 |
| C  | 39.862999 | 29.382999 | 50.000999 |
| C  | 40.061001 | 30.775000 | 49.834999 |
| C  | 39.159000 | 31.712999 | 50.415001 |
| C  | 41.187000 | 31.291000 | 49.123001 |
| C  | 39.382000 | 33.077999 | 50.312000 |
| C  | 41.387001 | 32.658001 | 49.014000 |
| C  | 40.493999 | 33.557999 | 49.609001 |
| H  | 41.793999 | 28.483000 | 50.044998 |
| H  | 40.450001 | 27.346001 | 49.835999 |
| H  | 38.953999 | 29.068001 | 50.513000 |
| H  | 38.294998 | 31.344000 | 50.965000 |
| H  | 41.868000 | 30.596001 | 48.651001 |
| H  | 38.692001 | 33.778000 | 50.777000 |
| H  | 42.238998 | 33.041000 | 48.459999 |
| H  | 40.673000 | 34.620998 | 49.512001 |
| O  | 40.973999 | 28.429001 | 48.138000 |

aMOx-Int1<sup>a</sup>

|    |           |           |           |
|----|-----------|-----------|-----------|
| S  | 43.424999 | 26.301001 | 45.518002 |
| C  | 45.018002 | 25.702000 | 46.188000 |
| H  | 45.716999 | 25.568001 | 45.355000 |
| H  | 45.437000 | 26.422001 | 46.889999 |
| N  | 41.620998 | 25.799999 | 48.112999 |
| N  | 40.706001 | 27.202999 | 45.786999 |
| N  | 42.769001 | 29.164000 | 46.198002 |
| C  | 41.351002 | 24.193001 | 49.757999 |
| N  | 43.719002 | 27.658001 | 48.433998 |
| C  | 40.362999 | 24.006001 | 48.847000 |
| C  | 42.167999 | 25.273001 | 49.269001 |
| C  | 43.348999 | 25.687000 | 49.862999 |
| C  | 40.515999 | 25.016001 | 47.825001 |
| C  | 39.679001 | 25.190001 | 46.734001 |
| C  | 39.749001 | 26.222000 | 45.798000 |
| C  | 38.819000 | 26.393999 | 44.695000 |
| C  | 39.264000 | 27.510000 | 44.035000 |
| C  | 40.428001 | 28.018000 | 44.714001 |
| C  | 41.150002 | 29.152000 | 44.358002 |
| C  | 42.233002 | 29.684999 | 45.049000 |
| C  | 42.964001 | 30.868999 | 44.623001 |
| C  | 43.950001 | 31.017000 | 45.561001 |
| C  | 43.828999 | 29.964001 | 46.533001 |
| C  | 44.660999 | 29.790001 | 47.636002 |
| C  | 44.592999 | 28.732000 | 48.523998 |
| C  | 45.458000 | 28.556999 | 49.666000 |
| C  | 44.051998 | 26.815001 | 49.484001 |
| C  | 45.167000 | 27.354000 | 50.219002 |
| H  | 43.731998 | 25.112000 | 50.695000 |
| H  | 38.870998 | 24.476000 | 46.618000 |
| H  | 40.855999 | 29.669001 | 43.452999 |
| H  | 45.451000 | 30.513000 | 47.792999 |
| Fe | 42.174999 | 27.464001 | 47.169998 |
| C  | 40.799999 | 28.372999 | 49.556000 |
| C  | 39.835999 | 29.448999 | 49.950001 |
| C  | 40.077000 | 30.834999 | 49.772999 |
| C  | 39.155998 | 31.799999 | 50.276001 |
| C  | 41.247002 | 31.323000 | 49.115002 |
| C  | 39.396000 | 33.159000 | 50.141998 |
| C  | 41.465000 | 32.686001 | 48.973999 |
| C  | 40.549000 | 33.611000 | 49.487000 |
| H  | 41.749001 | 28.483999 | 50.106998 |
| H  | 40.384998 | 27.389000 | 49.804001 |
| H  | 38.890999 | 29.153999 | 50.402000 |
| H  | 38.257999 | 31.455000 | 50.785999 |
| H  | 41.957001 | 30.618000 | 48.706001 |
| H  | 38.685001 | 33.875999 | 50.547001 |
| H  | 42.351002 | 33.042000 | 48.457001 |
| H  | 40.738998 | 34.668999 | 49.359001 |
| O  | 41.055000 | 28.468000 | 48.166000 |

aMOx-TS2<sup>d</sup>

|    |           |           |           |
|----|-----------|-----------|-----------|
| S  | 43.500999 | 26.295000 | 45.451000 |
| C  | 45.071999 | 25.646999 | 46.132999 |
| H  | 45.766998 | 25.472000 | 45.305000 |
| H  | 45.514999 | 26.368999 | 46.818001 |
| N  | 41.692001 | 25.747999 | 48.083000 |
| N  | 40.715000 | 27.191999 | 45.778999 |
| N  | 42.779999 | 29.129999 | 46.166000 |
| C  | 41.391998 | 24.172001 | 49.762001 |
| N  | 43.771999 | 27.622000 | 48.412998 |
| C  | 40.401001 | 23.986000 | 48.858002 |
| C  | 42.226002 | 25.232000 | 49.245998 |
| C  | 43.415001 | 25.652000 | 49.830002 |
| C  | 40.571999 | 24.982000 | 47.818001 |
| C  | 39.723000 | 25.172001 | 46.737000 |
| C  | 39.770000 | 26.207001 | 45.793999 |
| C  | 38.818001 | 26.367001 | 44.702000 |
| C  | 39.245998 | 27.485001 | 44.035000 |
| C  | 40.417000 | 27.996000 | 44.706001 |
| C  | 41.141998 | 29.132000 | 44.348999 |
| C  | 42.234001 | 29.667999 | 45.029999 |
| C  | 42.953999 | 30.858999 | 44.605999 |
| C  | 43.949001 | 30.997000 | 45.536999 |
| C  | 43.837002 | 29.930000 | 46.495998 |
| C  | 44.681000 | 29.749001 | 47.598999 |
| C  | 44.639999 | 28.695999 | 48.498001 |
| C  | 45.512001 | 28.539000 | 49.646000 |
| C  | 44.119999 | 26.788000 | 49.453999 |
| C  | 45.230999 | 27.337000 | 50.201000 |
| H  | 43.798000 | 25.079000 | 50.665001 |
| H  | 38.911999 | 24.459999 | 46.631001 |
| H  | 40.838001 | 29.653999 | 43.450001 |
| H  | 45.467999 | 30.480000 | 47.748001 |
| Fe | 42.252998 | 27.396000 | 47.090000 |
| C  | 41.091000 | 28.455999 | 49.612999 |
| C  | 40.046001 | 29.503000 | 49.745998 |
| C  | 40.266998 | 30.891001 | 49.536999 |
| C  | 39.207001 | 31.815001 | 49.744999 |
| C  | 41.528999 | 31.399000 | 49.113998 |
| C  | 39.405998 | 33.176998 | 49.569000 |
| C  | 41.702999 | 32.757999 | 48.909000 |
| C  | 40.653999 | 33.653000 | 49.148998 |
| H  | 42.071999 | 28.771999 | 49.991001 |
| H  | 40.807999 | 27.518999 | 50.111000 |
| H  | 39.015999 | 29.180000 | 49.886002 |
| H  | 38.233002 | 31.441999 | 50.053001 |
| H  | 42.339001 | 30.712000 | 48.910999 |
| H  | 38.584999 | 33.868999 | 49.738998 |
| H  | 42.657001 | 33.138000 | 48.556000 |
| H  | 40.807999 | 34.709999 | 48.972000 |
| O  | 41.014000 | 28.382999 | 48.215000 |

aMOx-TS2<sup>a</sup>

|    |           |           |           |
|----|-----------|-----------|-----------|
| S  | 43.543999 | 26.249001 | 45.382000 |
| C  | 45.111000 | 25.624001 | 46.094002 |
| H  | 45.830002 | 25.434999 | 45.290001 |
| H  | 45.533001 | 26.358999 | 46.778999 |
| N  | 41.683998 | 25.747999 | 48.084000 |
| N  | 40.743000 | 27.177000 | 45.778000 |
| N  | 42.813999 | 29.128000 | 46.175999 |
| C  | 41.388000 | 24.174999 | 49.757999 |
| N  | 43.787998 | 27.608000 | 48.396999 |
| C  | 40.395000 | 23.990999 | 48.853001 |
| C  | 42.223999 | 25.232000 | 49.248001 |
| C  | 43.410999 | 25.642000 | 49.834000 |
| C  | 40.562000 | 24.983999 | 47.814999 |
| C  | 39.717999 | 25.164000 | 46.730000 |
| C  | 39.784000 | 26.198000 | 45.794998 |
| C  | 38.842999 | 26.372999 | 44.702000 |
| C  | 39.284000 | 27.490000 | 44.039001 |
| C  | 40.455002 | 27.993999 | 44.709000 |
| C  | 41.178001 | 29.129000 | 44.352001 |
| C  | 42.264999 | 29.660000 | 45.037998 |
| C  | 42.985001 | 30.851999 | 44.618999 |
| C  | 43.977001 | 30.996000 | 45.550999 |
| C  | 43.870998 | 29.931999 | 46.513000 |
| C  | 44.710999 | 29.752001 | 47.609001 |
| C  | 44.654999 | 28.688000 | 48.492001 |
| C  | 45.513000 | 28.518000 | 49.639999 |
| C  | 44.118999 | 26.767000 | 49.450001 |
| C  | 45.227001 | 27.313000 | 50.192001 |
| H  | 43.790001 | 25.070999 | 50.672001 |
| H  | 38.904999 | 24.455999 | 46.620998 |
| H  | 40.875999 | 29.650999 | 43.452000 |
| H  | 45.499001 | 30.479000 | 47.766998 |
| Fe | 42.255001 | 27.403000 | 47.116001 |
| C  | 41.074001 | 28.481001 | 49.616001 |
| C  | 40.019001 | 29.514999 | 49.771000 |
| C  | 40.235001 | 30.906000 | 49.558998 |
| C  | 39.186001 | 31.833000 | 49.804001 |
| C  | 41.485001 | 31.413000 | 49.099998 |
| C  | 39.383999 | 33.195000 | 49.629002 |
| C  | 41.659000 | 32.773998 | 48.902000 |
| C  | 40.620998 | 33.671001 | 49.175999 |
| H  | 42.047001 | 28.791000 | 50.015999 |
| H  | 40.789001 | 27.525999 | 50.074001 |
| H  | 38.993999 | 29.184999 | 49.928001 |
| H  | 38.222000 | 31.462000 | 50.144001 |
| H  | 42.287998 | 30.726999 | 48.865002 |
| H  | 38.571999 | 33.888000 | 49.828999 |
| H  | 42.605000 | 33.152000 | 48.523998 |
| H  | 40.773998 | 34.728001 | 49.000000 |
| O  | 41.056000 | 28.424000 | 48.208000 |

aMOx-2-R<sup>d</sup>

|    |           |           |           |
|----|-----------|-----------|-----------|
| S  | 43.544998 | 26.356001 | 45.398998 |
| C  | 45.080002 | 25.691000 | 46.141998 |
| H  | 45.794998 | 25.500999 | 45.333000 |
| H  | 45.514000 | 26.413000 | 46.831001 |
| N  | 41.643002 | 25.937000 | 48.098000 |
| N  | 40.758999 | 27.320999 | 45.779999 |
| N  | 42.799999 | 29.240000 | 46.221001 |
| C  | 41.341000 | 24.325001 | 49.750999 |
| N  | 43.758999 | 27.738001 | 48.435001 |
| C  | 40.362999 | 24.138000 | 48.828999 |
| C  | 42.169998 | 25.395000 | 49.264000 |
| C  | 43.360001 | 25.782000 | 49.860001 |
| C  | 40.542999 | 25.136000 | 47.801998 |
| C  | 39.726002 | 25.302000 | 46.695000 |
| C  | 39.804001 | 26.334000 | 45.761002 |
| C  | 38.886002 | 26.497999 | 44.645000 |
| C  | 39.334000 | 27.614000 | 43.991001 |
| C  | 40.487000 | 28.121000 | 44.689999 |
| C  | 41.223999 | 29.246000 | 44.339001 |
| C  | 42.296001 | 29.771999 | 45.049999 |
| C  | 43.048000 | 30.937000 | 44.625000 |
| C  | 44.027000 | 31.073000 | 45.571999 |
| C  | 43.881001 | 30.028999 | 46.547001 |
| C  | 44.721001 | 29.847000 | 47.644001 |
| C  | 44.653999 | 28.792000 | 48.532001 |
| C  | 45.521000 | 28.608999 | 49.675999 |
| C  | 44.087002 | 26.896000 | 49.485001 |
| C  | 45.212002 | 27.412001 | 50.227001 |
| H  | 43.730000 | 25.195000 | 50.689999 |
| H  | 38.924000 | 24.583000 | 46.567001 |
| H  | 40.959000 | 29.750999 | 43.417000 |
| H  | 45.515999 | 30.566000 | 47.794998 |
| Fe | 42.382999 | 27.426001 | 47.005001 |
| C  | 39.655998 | 28.628000 | 49.091999 |
| C  | 38.669998 | 29.698999 | 49.338001 |
| C  | 39.022999 | 30.959000 | 50.057999 |
| C  | 38.372002 | 31.261999 | 51.262001 |
| C  | 39.991001 | 31.844999 | 49.568001 |
| C  | 38.686001 | 32.426998 | 51.959999 |
| C  | 40.301998 | 33.012001 | 50.268002 |
| C  | 39.652000 | 33.308998 | 51.466000 |
| H  | 40.681999 | 28.775000 | 49.424999 |
| H  | 39.324001 | 27.597000 | 48.997002 |
| H  | 37.622002 | 29.400999 | 49.410000 |
| H  | 37.626999 | 30.573000 | 51.659000 |
| H  | 40.497002 | 31.628000 | 48.634998 |
| H  | 38.173000 | 32.651001 | 52.890999 |
| H  | 41.042999 | 33.699001 | 49.868999 |
| H  | 39.889999 | 34.219002 | 52.009998 |
| O  | 39.231998 | 29.492001 | 48.030998 |

aMOx-2-R<sup>a</sup>

|    |           |           |           |
|----|-----------|-----------|-----------|
| S  | 43.645000 | 26.278000 | 45.279999 |
| C  | 45.167999 | 25.629999 | 46.070000 |
| H  | 45.912998 | 25.399000 | 45.300999 |
| H  | 45.583000 | 26.372999 | 46.750000 |
| N  | 41.627998 | 25.931000 | 48.098999 |
| N  | 40.742001 | 27.336000 | 45.799999 |
| N  | 42.806999 | 29.249001 | 46.220001 |
| C  | 41.334999 | 24.323000 | 49.751999 |
| N  | 43.750000 | 27.740999 | 48.425999 |
| C  | 40.346001 | 24.143999 | 48.840000 |
| C  | 42.167000 | 25.386000 | 49.257000 |
| C  | 43.361000 | 25.768000 | 49.842999 |
| C  | 40.515999 | 25.146999 | 47.817001 |
| C  | 39.687000 | 25.323000 | 46.721001 |
| C  | 39.775002 | 26.355000 | 45.789001 |
| C  | 38.866001 | 26.521999 | 44.671001 |
| C  | 39.327999 | 27.631001 | 44.009998 |
| C  | 40.480000 | 28.136000 | 44.703999 |
| C  | 41.223000 | 29.254000 | 44.344002 |
| C  | 42.299000 | 29.777000 | 45.051998 |
| C  | 43.049000 | 30.943001 | 44.625999 |
| C  | 44.027000 | 31.084999 | 45.575001 |
| C  | 43.882999 | 30.044001 | 46.551998 |
| C  | 44.716999 | 29.862000 | 47.648998 |
| C  | 44.644001 | 28.799000 | 48.529999 |
| C  | 45.507999 | 28.606001 | 49.667999 |
| C  | 44.081001 | 26.886999 | 49.470001 |
| C  | 45.202999 | 27.402000 | 50.210999 |
| H  | 43.737999 | 25.177999 | 50.667000 |
| H  | 38.877998 | 24.613001 | 46.596001 |
| H  | 40.959000 | 29.756001 | 43.419998 |
| H  | 45.513000 | 30.577999 | 47.806000 |
| Fe | 42.377998 | 27.423000 | 46.990002 |
| C  | 39.646000 | 28.625999 | 49.105999 |
| C  | 38.667000 | 29.705999 | 49.334999 |
| C  | 39.021999 | 30.965000 | 50.056000 |
| C  | 38.372002 | 31.266001 | 51.261002 |
| C  | 39.991001 | 31.850000 | 49.568001 |
| C  | 38.688000 | 32.430000 | 51.962002 |
| C  | 40.303001 | 33.015999 | 50.269001 |
| C  | 39.653999 | 33.312000 | 51.467999 |
| H  | 40.668999 | 28.764000 | 49.452000 |
| H  | 39.306000 | 27.597000 | 49.009998 |
| H  | 37.615002 | 29.417000 | 49.394001 |
| H  | 37.625999 | 30.577999 | 51.658001 |
| H  | 40.497002 | 31.632999 | 48.633999 |
| H  | 38.174000 | 32.653999 | 52.893002 |
| H  | 41.044998 | 33.702999 | 49.870998 |
| H  | 39.893002 | 34.221001 | 52.013000 |
| O  | 39.243999 | 29.490000 | 48.036999 |

aMOx-Int2<sup>d</sup>

|    |           |           |           |
|----|-----------|-----------|-----------|
| S  | 43.283001 | 26.370001 | 45.618999 |
| C  | 44.904999 | 25.811001 | 46.272999 |
| H  | 45.608002 | 25.701000 | 45.438999 |
| H  | 45.307999 | 26.531000 | 46.983002 |
| N  | 41.428001 | 25.969000 | 48.169998 |
| N  | 40.557999 | 27.372000 | 45.837002 |
| N  | 42.675999 | 29.299000 | 46.251999 |
| C  | 41.202999 | 24.305000 | 49.768002 |
| N  | 43.580002 | 27.820000 | 48.514000 |
| C  | 40.219002 | 24.114000 | 48.854000 |
| C  | 41.993000 | 25.422001 | 49.304001 |
| C  | 43.174000 | 25.841000 | 49.902000 |
| C  | 40.349998 | 25.155001 | 47.855000 |
| C  | 39.518002 | 25.354000 | 46.764000 |
| C  | 39.605999 | 26.393000 | 45.820000 |
| C  | 38.714001 | 26.545000 | 44.679001 |
| C  | 39.188000 | 27.648001 | 44.016998 |
| C  | 40.327999 | 28.163000 | 44.735001 |
| C  | 41.084999 | 29.278000 | 44.383999 |
| C  | 42.174000 | 29.806000 | 45.082001 |
| C  | 42.945000 | 30.959000 | 44.632999 |
| C  | 43.925999 | 31.098000 | 45.578999 |
| C  | 43.758999 | 30.075001 | 46.576000 |
| C  | 44.582001 | 29.895000 | 47.688999 |
| C  | 44.490002 | 28.851000 | 48.595001 |
| C  | 45.376999 | 28.646000 | 49.724998 |
| C  | 43.897999 | 26.966999 | 49.542999 |
| C  | 45.049000 | 27.455000 | 50.277000 |
| H  | 43.560001 | 25.247000 | 50.719002 |
| H  | 38.716000 | 24.636999 | 46.624001 |
| H  | 40.821999 | 29.783001 | 43.462002 |
| H  | 45.396000 | 30.596001 | 47.831001 |
| Fe | 42.056999 | 27.608000 | 47.181999 |
| C  | 39.743999 | 28.216999 | 48.776001 |
| C  | 38.869999 | 28.980000 | 49.653000 |
| C  | 39.012001 | 30.297001 | 50.147999 |
| C  | 38.077999 | 30.778000 | 51.113998 |
| C  | 40.051998 | 31.170000 | 49.714001 |
| C  | 38.191002 | 32.060001 | 51.624001 |
| C  | 40.131001 | 32.466000 | 50.212002 |
| C  | 39.212002 | 32.911999 | 51.167000 |
| H  | 39.930000 | 27.259001 | 49.341999 |
| H  | 39.049000 | 27.788000 | 48.000000 |
| H  | 37.974998 | 28.438000 | 49.959999 |
| H  | 37.290001 | 30.115000 | 51.465000 |
| H  | 40.779999 | 30.791000 | 49.004002 |
| H  | 37.500000 | 32.410999 | 52.387001 |
| H  | 40.910000 | 33.137001 | 49.862999 |
| H  | 39.285000 | 33.921001 | 51.564999 |
| O  | 40.879002 | 28.749001 | 48.284000 |

aMOx-Int2<sup>a</sup>

|    |           |           |           |
|----|-----------|-----------|-----------|
| S  | 43.397999 | 26.334999 | 45.428001 |
| C  | 44.967999 | 25.733999 | 46.173000 |
| H  | 45.361000 | 26.475000 | 46.869999 |
| H  | 45.715000 | 25.563999 | 45.389000 |
| N  | 41.402000 | 26.098000 | 48.145000 |
| N  | 40.595001 | 27.466000 | 45.749001 |
| N  | 42.715000 | 29.379000 | 46.186001 |
| C  | 41.161999 | 24.417000 | 49.723000 |
| N  | 43.571999 | 27.900000 | 48.477001 |
| C  | 40.186001 | 24.238001 | 48.797001 |
| C  | 41.959999 | 25.530001 | 49.277000 |
| C  | 43.146000 | 25.924000 | 49.874001 |
| C  | 40.328999 | 25.285999 | 47.806000 |
| C  | 39.521000 | 25.474001 | 46.694000 |
| C  | 39.632999 | 26.495001 | 45.737000 |
| C  | 38.757999 | 26.643000 | 44.583000 |
| C  | 39.247002 | 27.737000 | 43.916000 |
| C  | 40.382999 | 28.249001 | 44.639999 |
| C  | 41.153999 | 29.356001 | 44.287998 |
| C  | 42.236000 | 29.877001 | 45.000000 |
| C  | 43.025002 | 31.016001 | 44.556000 |
| C  | 43.993999 | 31.153000 | 45.514999 |
| C  | 43.803001 | 30.143000 | 46.520000 |
| C  | 44.609001 | 29.962999 | 47.645000 |
| C  | 44.499001 | 28.924000 | 48.554001 |
| C  | 45.375999 | 28.705000 | 49.683998 |
| C  | 43.882999 | 27.039000 | 49.509998 |
| C  | 45.037998 | 27.514000 | 50.236000 |
| H  | 43.527000 | 25.322001 | 50.687000 |
| H  | 38.721001 | 24.757000 | 46.547001 |
| H  | 40.911999 | 29.851000 | 43.355000 |
| H  | 45.430000 | 30.655001 | 47.792000 |
| Fe | 42.081001 | 27.704000 | 47.132999 |
| C  | 39.618000 | 28.448000 | 48.789001 |
| C  | 38.825001 | 29.163000 | 49.783001 |
| C  | 38.981998 | 30.479000 | 50.278000 |
| C  | 38.120998 | 30.936001 | 51.319000 |
| C  | 39.967999 | 31.372000 | 49.768002 |
| C  | 38.242001 | 32.222000 | 51.817001 |
| C  | 40.064999 | 32.666000 | 50.266998 |
| C  | 39.209999 | 33.092999 | 51.287998 |
| H  | 39.900002 | 27.502001 | 49.341000 |
| H  | 38.849998 | 27.986000 | 48.104000 |
| H  | 37.998001 | 28.582001 | 50.192001 |
| H  | 37.377998 | 30.254999 | 51.728001 |
| H  | 40.644001 | 31.009001 | 49.004002 |
| H  | 37.597000 | 32.560001 | 52.625000 |
| H  | 40.807999 | 33.348999 | 49.866001 |
| H  | 39.294998 | 34.102001 | 51.683998 |
| O  | 40.659000 | 29.004000 | 48.157001 |

aMOx-TS3-cis-si<sup>d</sup>

|    |           |           |           |
|----|-----------|-----------|-----------|
| S  | 43.366001 | 26.431999 | 45.576000 |
| C  | 44.929001 | 25.795000 | 46.289001 |
| H  | 45.646000 | 25.664000 | 45.470001 |
| H  | 45.340000 | 26.506001 | 47.004002 |
| N  | 41.476002 | 25.947001 | 48.105999 |
| N  | 40.584999 | 27.368999 | 45.764000 |
| N  | 42.652000 | 29.302999 | 46.202999 |
| C  | 41.195000 | 24.320999 | 49.737000 |
| N  | 43.577999 | 27.804001 | 48.478001 |
| C  | 40.238998 | 24.115000 | 48.796001 |
| C  | 42.000000 | 25.424999 | 49.276001 |
| C  | 43.165001 | 25.848000 | 49.895000 |
| C  | 40.408001 | 25.136000 | 47.778999 |
| C  | 39.592999 | 25.313000 | 46.664001 |
| C  | 39.658001 | 26.360001 | 45.734001 |
| C  | 38.752998 | 26.516001 | 44.604000 |
| C  | 39.188999 | 27.646000 | 43.963001 |
| C  | 40.323002 | 28.174000 | 44.680000 |
| C  | 41.056999 | 29.309000 | 44.340000 |
| C  | 42.146999 | 29.827000 | 45.037998 |
| C  | 42.922001 | 30.980000 | 44.599998 |
| C  | 43.909000 | 31.101000 | 45.543999 |
| C  | 43.743000 | 30.066000 | 46.529999 |
| C  | 44.574001 | 29.877001 | 47.636002 |
| C  | 44.486000 | 28.837999 | 48.547001 |
| C  | 45.370998 | 28.645000 | 49.685001 |
| C  | 43.894001 | 26.965000 | 49.522999 |
| C  | 45.042999 | 27.462000 | 50.251999 |
| H  | 43.532001 | 25.270000 | 50.731998 |
| H  | 38.806999 | 24.580999 | 46.514999 |
| H  | 40.780998 | 29.826000 | 43.428001 |
| H  | 45.390999 | 30.576000 | 47.772999 |
| Fe | 42.091999 | 27.576000 | 47.110001 |
| C  | 39.749001 | 28.195999 | 48.792999 |
| C  | 38.849998 | 28.929001 | 49.658001 |
| C  | 39.007000 | 30.238001 | 50.205002 |
| C  | 38.096001 | 30.686001 | 51.199001 |
| C  | 40.004002 | 31.132999 | 49.734001 |
| C  | 38.180000 | 31.978001 | 51.695000 |
| C  | 40.063000 | 32.433998 | 50.226002 |
| C  | 39.159000 | 32.856998 | 51.205002 |
| H  | 39.966000 | 27.580000 | 49.776001 |
| H  | 39.210999 | 27.413000 | 48.223999 |
| H  | 37.979000 | 28.357000 | 49.976002 |
| H  | 37.334999 | 30.004000 | 51.573002 |
| H  | 40.724998 | 30.775000 | 49.007000 |
| H  | 37.498001 | 32.313000 | 52.473000 |
| H  | 40.813000 | 33.124001 | 49.851002 |
| H  | 39.215000 | 33.869999 | 51.596001 |
| O  | 40.834000 | 28.709000 | 48.256001 |

aMOx-TS3-cis-si<sup>a</sup>

|    |           |           |           |
|----|-----------|-----------|-----------|
| S  | 43.435001 | 26.327999 | 45.391998 |
| C  | 44.992001 | 25.719999 | 46.157001 |
| H  | 45.744999 | 25.537001 | 45.382000 |
| H  | 45.382999 | 26.464001 | 46.852001 |
| N  | 41.411999 | 26.075001 | 48.111000 |
| N  | 40.602001 | 27.447001 | 45.727001 |
| N  | 42.717999 | 29.361000 | 46.167000 |
| C  | 41.153999 | 24.413000 | 49.708000 |
| N  | 43.575001 | 27.882000 | 48.455002 |
| C  | 40.183998 | 24.228001 | 48.776001 |
| C  | 41.957001 | 25.521000 | 49.256001 |
| C  | 43.139000 | 25.915001 | 49.861000 |
| C  | 40.339001 | 25.264999 | 47.777000 |
| C  | 39.535999 | 25.443001 | 46.657001 |
| C  | 39.644001 | 26.468000 | 45.708000 |
| C  | 38.765999 | 26.624001 | 44.558998 |
| C  | 39.245998 | 27.728001 | 43.902000 |
| C  | 40.382000 | 28.239000 | 44.625999 |
| C  | 41.146000 | 29.351999 | 44.278999 |
| C  | 42.230999 | 29.868000 | 44.987999 |
| C  | 43.015999 | 31.011999 | 44.549000 |
| C  | 43.988998 | 31.143999 | 45.505001 |
| C  | 43.805000 | 30.127001 | 46.504002 |
| C  | 44.613998 | 29.945000 | 47.625000 |
| C  | 44.500999 | 28.907000 | 48.533001 |
| C  | 45.372002 | 28.691000 | 49.668999 |
| C  | 43.880001 | 27.025000 | 49.494999 |
| C  | 45.030998 | 27.502001 | 50.223999 |
| H  | 43.511002 | 25.319000 | 50.681999 |
| H  | 38.738998 | 24.723000 | 46.507999 |
| H  | 40.897999 | 29.853001 | 43.351002 |
| H  | 45.435001 | 30.636999 | 47.772999 |
| Fe | 42.106998 | 27.662001 | 47.088001 |
| C  | 39.597000 | 28.492001 | 48.757000 |
| C  | 38.759998 | 29.190001 | 49.716000 |
| C  | 38.957001 | 30.479000 | 50.285999 |
| C  | 38.105999 | 30.909000 | 51.341000 |
| C  | 39.942001 | 31.375000 | 49.791000 |
| C  | 38.229000 | 32.186001 | 51.863998 |
| C  | 40.048000 | 32.658001 | 50.319000 |
| C  | 39.196999 | 33.064999 | 51.349998 |
| H  | 39.884998 | 27.774000 | 49.634998 |
| H  | 38.987999 | 27.768999 | 48.167999 |
| H  | 37.916000 | 28.605000 | 50.083000 |
| H  | 37.360001 | 30.223000 | 51.737000 |
| H  | 40.615002 | 31.028000 | 49.016998 |
| H  | 37.585999 | 32.509998 | 52.678001 |
| H  | 40.791000 | 33.347000 | 49.929001 |
| H  | 39.285999 | 34.066002 | 51.763000 |
| O  | 40.641998 | 29.021000 | 48.159000 |



aMOx-TS3-trans-re<sup>d</sup>

|    |           |           |           |
|----|-----------|-----------|-----------|
| S  | 43.353001 | 26.431000 | 45.599998 |
| C  | 44.929001 | 25.795000 | 46.285000 |
| H  | 45.633999 | 25.670000 | 45.453999 |
| H  | 45.348999 | 26.503000 | 46.998001 |
| N  | 41.522999 | 25.884001 | 48.154999 |
| N  | 40.563999 | 27.336000 | 45.858002 |
| N  | 42.624001 | 29.278999 | 46.273998 |
| C  | 41.270000 | 24.247999 | 49.778999 |
| N  | 43.604000 | 27.764000 | 48.515999 |
| C  | 40.300999 | 24.045000 | 48.851002 |
| C  | 42.063999 | 25.357000 | 49.312000 |
| C  | 43.229000 | 25.792999 | 49.924999 |
| C  | 40.445999 | 25.070000 | 47.838001 |
| C  | 39.605999 | 25.259001 | 46.749001 |
| C  | 39.643002 | 26.320999 | 45.834999 |
| C  | 38.724998 | 26.472000 | 44.715000 |
| C  | 39.151001 | 27.601999 | 44.067001 |
| C  | 40.287998 | 28.139000 | 44.775002 |
| C  | 41.011002 | 29.277000 | 44.426998 |
| C  | 42.106998 | 29.799999 | 45.113998 |
| C  | 42.875999 | 30.952999 | 44.664001 |
| C  | 43.872002 | 31.077999 | 45.597000 |
| C  | 43.719002 | 30.044001 | 46.587002 |
| C  | 44.564999 | 29.856001 | 47.680000 |
| C  | 44.497002 | 28.809999 | 48.585999 |
| C  | 45.387001 | 28.629000 | 49.720001 |
| C  | 43.936001 | 26.926001 | 49.557999 |
| C  | 45.074001 | 27.443001 | 50.287998 |
| H  | 43.613998 | 25.211000 | 50.750999 |
| H  | 38.820999 | 24.524000 | 46.606998 |
| H  | 40.724998 | 29.792000 | 43.518002 |
| H  | 45.377998 | 30.561001 | 47.812000 |
| Fe | 42.099998 | 27.534000 | 47.176998 |
| C  | 39.771999 | 28.112000 | 48.915001 |
| C  | 38.879002 | 28.820000 | 49.806000 |
| C  | 38.891998 | 30.195000 | 50.183998 |
| C  | 37.886002 | 30.670000 | 51.066002 |
| C  | 39.910999 | 31.087999 | 49.759998 |
| C  | 37.908001 | 31.982000 | 51.514000 |
| C  | 39.902000 | 32.410999 | 50.191002 |
| C  | 38.910000 | 32.858002 | 51.070000 |
| H  | 39.785999 | 27.025999 | 49.125999 |
| H  | 38.834000 | 28.124001 | 48.192001 |
| H  | 38.037998 | 28.221001 | 50.153000 |
| H  | 37.112000 | 29.988001 | 51.410999 |
| H  | 40.695000 | 30.712000 | 49.110001 |
| H  | 37.159000 | 32.332001 | 52.221001 |
| H  | 40.671001 | 33.098999 | 49.852001 |
| H  | 38.917000 | 33.887001 | 51.421001 |
| O  | 40.860001 | 28.629000 | 48.394001 |

aMOx-TS3-trans-re<sup>g</sup>

|    |           |           |           |
|----|-----------|-----------|-----------|
| S  | 43.436001 | 26.333000 | 45.395000 |
| C  | 44.997002 | 25.722000 | 46.153000 |
| H  | 45.745998 | 25.539000 | 45.374001 |
| H  | 45.390999 | 26.465000 | 46.847000 |
| N  | 41.439999 | 26.028000 | 48.123001 |
| N  | 40.588001 | 27.429001 | 45.772999 |
| N  | 42.695999 | 29.350000 | 46.205002 |
| C  | 41.189999 | 24.365999 | 49.720001 |
| N  | 43.584999 | 27.856001 | 48.471001 |
| C  | 40.215000 | 24.180000 | 48.793999 |
| C  | 41.988998 | 25.474001 | 49.264000 |
| C  | 43.167999 | 25.879999 | 49.869999 |
| C  | 40.361000 | 25.218000 | 47.793999 |
| C  | 39.544998 | 25.405001 | 46.688000 |
| C  | 39.637001 | 26.443001 | 45.751999 |
| C  | 38.751999 | 26.599001 | 44.608002 |
| C  | 39.222000 | 27.709000 | 43.952999 |
| C  | 40.356998 | 28.224001 | 44.674000 |
| C  | 41.112999 | 29.341999 | 44.326000 |
| C  | 42.202000 | 29.858000 | 45.028999 |
| C  | 42.985001 | 31.002001 | 44.584999 |
| C  | 43.964001 | 31.134001 | 45.535000 |
| C  | 43.785999 | 30.115000 | 46.534000 |
| C  | 44.604000 | 29.933001 | 47.647999 |
| C  | 44.500000 | 28.889000 | 48.553001 |
| C  | 45.372002 | 28.680000 | 49.688000 |
| C  | 43.896000 | 27.000000 | 49.508999 |
| C  | 45.037998 | 27.490000 | 50.243000 |
| H  | 43.548000 | 25.283001 | 50.687000 |
| H  | 38.750999 | 24.681999 | 46.539001 |
| H  | 40.858002 | 29.844999 | 43.401001 |
| H  | 45.421001 | 30.628000 | 47.793999 |
| Fe | 42.106998 | 27.638000 | 47.117001 |
| C  | 39.632999 | 28.410999 | 48.908001 |
| C  | 38.824001 | 29.082001 | 49.909000 |
| C  | 38.862999 | 30.441999 | 50.320999 |
| C  | 37.930000 | 30.895000 | 51.292999 |
| C  | 39.842999 | 31.348000 | 49.833000 |
| C  | 37.980000 | 32.201000 | 51.755001 |
| C  | 39.868999 | 32.660000 | 50.292999 |
| C  | 38.944000 | 33.088001 | 51.249001 |
| H  | 39.730000 | 27.330999 | 49.159000 |
| H  | 38.664001 | 28.327000 | 48.257000 |
| H  | 38.023998 | 28.465000 | 50.321999 |
| H  | 37.191002 | 30.200001 | 51.687000 |
| H  | 40.569000 | 30.986000 | 49.116001 |
| H  | 37.282001 | 32.537998 | 52.518002 |
| H  | 40.610001 | 33.355999 | 49.910000 |
| H  | 38.972000 | 34.112000 | 51.612999 |
| O  | 40.652000 | 28.957001 | 48.279999 |

aMOx-3<sup>d</sup>

|    |           |           |           |
|----|-----------|-----------|-----------|
| S  | 43.349998 | 26.447001 | 45.590000 |
| C  | 44.918999 | 25.802999 | 46.280998 |
| H  | 45.623001 | 25.691999 | 45.448002 |
| H  | 45.338001 | 26.504999 | 47.000999 |
| N  | 41.522999 | 25.940001 | 48.157001 |
| N  | 40.577999 | 27.371000 | 45.863998 |
| N  | 42.620998 | 29.316999 | 46.289001 |
| C  | 41.299999 | 24.268000 | 49.755001 |
| N  | 43.598000 | 27.809999 | 48.520000 |
| C  | 40.328999 | 24.069000 | 48.827999 |
| C  | 42.076000 | 25.395000 | 49.305000 |
| C  | 43.243000 | 25.825001 | 49.914001 |
| C  | 40.462002 | 25.108999 | 47.830002 |
| C  | 39.632999 | 25.281000 | 46.729000 |
| C  | 39.669998 | 26.341999 | 45.820000 |
| C  | 38.759998 | 26.489000 | 44.694000 |
| C  | 39.174999 | 27.629999 | 44.058998 |
| C  | 40.299000 | 28.174000 | 44.777000 |
| C  | 41.015999 | 29.315001 | 44.432999 |
| C  | 42.108002 | 29.839001 | 45.122002 |
| C  | 42.876999 | 30.988001 | 44.672001 |
| C  | 43.875999 | 31.112000 | 45.604000 |
| C  | 43.721001 | 30.083000 | 46.595001 |
| C  | 44.569000 | 29.898001 | 47.686001 |
| C  | 44.498001 | 28.855000 | 48.591000 |
| C  | 45.388000 | 28.669001 | 49.721001 |
| C  | 43.938999 | 26.966000 | 49.556999 |
| C  | 45.075001 | 27.481001 | 50.285999 |
| H  | 43.640999 | 25.230000 | 50.723999 |
| H  | 38.860001 | 24.535000 | 46.580002 |
| H  | 40.731998 | 29.827000 | 43.521000 |
| H  | 45.382000 | 30.603001 | 47.817001 |
| Fe | 42.141998 | 27.544001 | 47.148998 |
| C  | 39.646000 | 28.278999 | 48.995998 |
| C  | 38.589001 | 28.985001 | 49.820000 |
| C  | 38.830002 | 30.426001 | 50.209000 |
| C  | 39.502998 | 30.742001 | 51.398998 |
| C  | 38.367001 | 31.476999 | 49.404999 |
| C  | 39.716999 | 32.069000 | 51.772999 |
| C  | 38.598000 | 32.806999 | 49.765999 |
| C  | 39.268002 | 33.108002 | 50.952999 |
| H  | 38.438999 | 28.351999 | 50.709000 |
| H  | 39.417999 | 27.222000 | 48.786999 |
| H  | 37.653999 | 28.878000 | 49.245998 |
| H  | 39.861000 | 29.945000 | 52.042000 |
| H  | 37.824001 | 31.261000 | 48.486000 |
| H  | 40.237000 | 32.298000 | 52.700001 |
| H  | 38.251999 | 33.608002 | 49.118000 |
| H  | 39.435001 | 34.139999 | 51.247002 |
| O  | 40.675999 | 28.775000 | 48.567001 |

aMOx-3<sup>e</sup>

|    |           |           |           |
|----|-----------|-----------|-----------|
| S  | 43.534000 | 26.327999 | 45.349998 |
| C  | 45.077000 | 25.694000 | 46.113998 |
| H  | 45.819000 | 25.495001 | 45.334000 |
| H  | 45.484001 | 26.431999 | 46.805000 |
| N  | 41.550999 | 25.955999 | 48.133999 |
| N  | 40.639999 | 27.370001 | 45.839001 |
| N  | 42.702999 | 29.306000 | 46.259998 |
| C  | 41.313999 | 24.297001 | 49.743999 |
| N  | 43.660000 | 27.794001 | 48.466000 |
| C  | 40.326000 | 24.115000 | 48.832001 |
| C  | 42.111000 | 25.400999 | 49.273998 |
| C  | 43.296001 | 25.804001 | 49.863998 |
| C  | 40.464001 | 25.148001 | 47.831001 |
| C  | 39.629002 | 25.323999 | 46.737999 |
| C  | 39.695999 | 26.370001 | 45.816002 |
| C  | 38.786999 | 26.531000 | 44.696999 |
| C  | 39.229000 | 27.656000 | 44.048000 |
| C  | 40.369999 | 28.177000 | 44.750999 |
| C  | 41.097000 | 29.308001 | 44.401001 |
| C  | 42.182999 | 29.830999 | 45.097000 |
| C  | 42.938999 | 30.992001 | 44.659000 |
| C  | 43.931999 | 31.125000 | 45.596001 |
| C  | 43.789001 | 30.090000 | 46.577999 |
| C  | 44.629002 | 29.906000 | 47.672001 |
| C  | 44.554001 | 28.851000 | 48.560001 |
| C  | 45.425999 | 28.658001 | 49.695000 |
| C  | 43.995998 | 26.940001 | 49.504002 |
| C  | 45.118999 | 27.457001 | 50.243000 |
| H  | 43.693001 | 25.205000 | 50.672001 |
| H  | 38.837002 | 24.597000 | 46.602001 |
| H  | 40.817001 | 29.820000 | 43.488998 |
| H  | 45.432999 | 30.617001 | 47.819000 |
| Fe | 42.249001 | 27.500000 | 47.068001 |
| C  | 39.347000 | 28.457001 | 49.070999 |
| C  | 38.252998 | 29.134001 | 49.882999 |
| C  | 38.537998 | 30.563000 | 50.278000 |
| C  | 39.145000 | 30.853001 | 51.508999 |
| C  | 38.242001 | 31.625000 | 49.412998 |
| C  | 39.462002 | 32.165001 | 51.862000 |
| C  | 38.567001 | 32.938999 | 49.757999 |
| C  | 39.176998 | 33.214001 | 50.984001 |
| H  | 38.074001 | 28.497999 | 50.762001 |
| H  | 39.186001 | 27.377001 | 48.896000 |
| H  | 37.334000 | 29.052000 | 49.278999 |
| H  | 39.369999 | 30.045000 | 52.199001 |
| H  | 37.758999 | 31.427999 | 48.457001 |
| H  | 39.937000 | 32.374001 | 52.818001 |
| H  | 38.342999 | 33.745998 | 49.064999 |
| H  | 39.422001 | 34.234001 | 51.264000 |
| O  | 40.330002 | 29.011999 | 48.619999 |

## D. References

- (1) Frisch, M. J.; Trucks, G. W.; Schlegel, H. B.; Scuseria, G. E.; Robb, M. a.; Cheeseman, J. R.; Scalmani, G.; Barone, V.; Petersson, G. a.; Nakatsuji, H.; Li, X.; Caricato, M.; Marenich, a. V.; Bloino, J.; Janesko, B. G.; Gomperts, R.; Mennucci, B.; Hratchian, H. P.; Ortiz, J. V.; Izmaylov, a. F.; Sonnenberg, J. L.; Williams; Ding, F.; Lipparini, F.; Egidi, F.; Goings, J.; Peng, B.; Petrone, A.; Henderson, T.; Ranasinghe, D.; Zakrzewski, V. G.; Gao, J.; Rega, N.; Zheng, G.; Liang, W.; Hada, M.; Ehara, M.; Toyota, K.; Fukuda, R.; Hasegawa, J.; Ishida, M.; Nakajima, T.; Honda, Y.; Kitao, O.; Nakai, H.; Vreven, T.; Throssell, K.; Montgomery Jr., J. a.; Peralta, J. E.; Ogliaro, F.; Bearpark, M. J.; Heyd, J. J.; Brothers, E. N.; Kudin, K. N.; Staroverov, V. N.; Keith, T. a.; Kobayashi, R.; Normand, J.; Raghavachari, K.; Rendell, a. P.; Burant, J. C.; Iyengar, S. S.; Tomasi, J.; Cossi, M.; Millam, J. M.; Klene, M.; Adamo, C.; Cammi, R.; Ochterski, J. W.; Martin, R. L.; Morokuma, K.; Farkas, O.; Foresman, J. B.; Fox, D. J. Gaussian 09. 2009, p Gaussian 09, Revision D.01, Gaussian, Inc., Wallin.
- (2) Lee, C.; Yang, W.; Parr, R. G. Development of the Colle-Salvetti Correlation-Energy Formula into a Functional of the Electron Density. *Phys. Rev. B* **1988**, *37* (2), 785–789. <https://doi.org/10.1103/PhysRevB.37.785>.
- (3) Becke, A. D. Density-functional Thermochemistry. III. The Role of Exact Exchange. *J. Chem. Phys.* **1993**, *98* (7), 5648–5652. <https://doi.org/10.1063/1.464913>.
- (4) Becke, A. D. Density-Functional Exchange-Energy Approximation with Correct Asymptotic Behavior. *Phys. Rev. A* **1988**, *38* (6), 3098–3100. <https://doi.org/10.1103/PhysRevA.38.3098>.
- (5) Bootsma, A.; N.; Wheeler, S. Popular Integration Grids Can Result in Large Errors in DFT-Computed Free Energies. **2019**. <https://doi.org/10.26434/CHEMRXIV.8864204.V5>.
- (6) Barone, V.; Cossi, M. Quantum Calculation of Molecular Energies and Energy Gradients in Solution by a Conductor Solvent Model. *J. Phys. Chem. A* **1998**, *102* (11), 1995–2001. <https://doi.org/10.1021/jp9716997>.
- (7) Cossi, M.; Rega, N.; Scalmani, G.; Barone, V. Energies, Structures, and Electronic Properties of Molecules in Solution with the C-PCM Solvation Model. *J. Comput. Chem.* **2003**, *24* (6), 669–681. <https://doi.org/10.1002/jcc.10189>.
- (8) Schutz, C. N.; Warshel, A. What Are the Dielectric “Constants” of Proteins and How to Validate Electrostatic Models? *Proteins Struct. Funct. Genet.* **2001**, *44* (4), 400–417. <https://doi.org/10.1002/prot.1106>.
- (9) Li, L.; Li, C.; Zhang, Z.; Alexov, E. On the Dielectric “Constant” of Proteins: Smooth Dielectric Function for Macromolecular Modeling and Its Implementation in DelPhi. *J. Chem. Theory Comput.* **2013**, *9* (4), 2126–2136. <https://doi.org/10.1021/ct400065j>.
- (10) Warshel, A.; Papazyan, A. Electrostatic Effects in Macromolecules: Fundamental Concepts and Practical Modeling. *Curr. Opin. Struct. Biol.* **1998**, *8*, 211–217.
- (11) Ribeiro, R. F.; Marenich, A. V.; Cramer, C. J.; Truhlar, D. G. Use of Solution-Phase Vibrational Frequencies in Continuum Models for the Free Energy of Solvation. *J. Phys. Chem. B* **2011**, *115* (49), 14556–14562. <https://doi.org/10.1021/jp205508z>.
- (12) Zhao, Y.; Truhlar, D. G. Computational Characterization and Modeling of Buckyball Tweezers: Density Functional Study of Concave–Convex  $\pi\cdots\pi$  Interactions. *Phys. Chem. Chem. Phys.* **2008**, *10* (19), 2813. <https://doi.org/10.1039/b717744e>.
- (13) Funes-Ardoiz, I.; Paton, R. S. GoodVibes: GoodVibes v1.0.1. August 2016. <https://doi.org/10.5281/ZENODO.60811>.
- (14) Grimme, S.; Ehrlich, S.; Goerigk, L. Effect of the Damping Function in Dispersion Corrected Density Functional Theory. *J. Comput. Chem.* **2011**, *32* (7), 1456–1465. <https://doi.org/10.1002/jcc.21759>.
- (15) Shaik, S.; Cohen, S.; Wang, Y.; Chen, H.; Kumar, D.; Thiel, W. P450 Enzymes: Their

- Structure, Reactivity, and Selectivity - Modeled by QM/MM Calculations. *Chem. Rev.* **2010**, *110* (2), 949–1017. <https://doi.org/10.1021/cr900121s>.
- (16) Radon, M.; Broclawik, E. Peculiarities of the Electronic Structure of Cytochrome P450 Compound I: CASPT2 and DFT Modeling. *J. Chem. Theory Comput.* **2007**, *3*, 728–734.
- (17) Chen, H.; Song, J.; Lai, W.; Wu, W.; Shaik, S. Multiple Low-Lying States for Compound I of P450cam and Chloroperoxidase Revealed from Multireference Ab Initio QM/MM Calculations. *J. Chem. Theory Comput.* **2010**, *6* (3), 940–953. <https://doi.org/10.1021/ct9006234>.
- (18) Chen, H.; Lai, W.; Shaik, S. Multireference and Multiconfiguration Ab Initio Methods in Heme-Related Systems: What Have We Learned so Far? *J. Phys. Chem. B* **2011**, *115* (8), 1727–1742. <https://doi.org/10.1021/jp110016u>.
- (19) Legault, C. Y. CYLview, 1.0b. Université de Sherbrooke 2009, p Université de Sherbrooke.
- (20) The PyMOL Molecular Graphics System, Version 2.0. p Schrödinger, LLC.
- (21) Harvey, J. N.; Aschi, M.; Schwarz, H.; Koch, W. The Singlet and Triplet States of Phenyl Cation. A Hybrid Approach for Locating Minimum Energy Crossing Points between Non-Interacting Potential Energy Surfaces. *Theor. Chem. Acc.* **1998**, *99* (2), 95–99. <https://doi.org/10.1007/s002140050309>.
- (22) Rodríguez-Guerra, J. Jaimergp/Easymecp: V0.3.2. **2020**. <https://doi.org/10.5281/ZENODO.4293422>.
- (23) Kurouchi, H.; Singleton, D. A. Labelling and Determination of the Energy in Reactive Intermediates in Solution Enabled by Energy-Dependent Reaction Selectivity. *Nat. Chem.* **2018**, *10* (2), 237–241. <https://doi.org/10.1038/NCHEM.2907>.
- (24) Yang, Z.; Houk, K. N. The Dynamics of Chemical Reactions: Atomistic Visualizations of Organic Reactions, and Homage to van 't Hoff. *Chem. Eur. J.* **2018**, *24* (16), 3916–3924. <https://doi.org/10.1002/chem.201706032>.
- (25) Gonzalez-James, O. M.; Kwan, E. E.; Singleton, D. A. Entropic Intermediates and Hidden Rate-Limiting Steps in Seemingly Concerted Cycloadditions. Observation, Prediction, and Origin of an Isotope Effect on Recrossing. *J. Am. Chem. Soc.* **2012**, *134* (4), 1914–1917. <https://doi.org/10.1021/ja208779k>.
- (26) Kelly, K. K.; Hirschi, J. S.; Singleton, D. A. Newtonian Kinetic Isotope Effects . Observation, Prediction, and Origin of Heavy-Atom Dynamic Isotope Effects. *J. Am. Chem. Soc.* **2009**, *131*, 8382–8383.
- (27) Wang, Z.; Hirschi, J. S.; Singleton, D. A. Recrossing and Dynamic Matching Effects on Selectivity in a Diels-Alder Reaction. *Angew. Chemie - Int. Ed.* **2009**, *48* (48), 9156–9159. <https://doi.org/10.1002/anie.200903293>.
- (28) Waterhouse, A.; Bertoni, M.; Bienert, S.; Studer, G.; Tauriello, G.; Gumienny, R.; Heer, F. T.; De Beer, T. A. P.; Rempfer, C.; Bordoli, L.; Lepore, R.; Schwede, T. SWISS-MODEL: Homology Modelling of Protein Structures and Complexes. *Nucleic Acids Res.* **2018**, *46* (W1), W296–W303. <https://doi.org/10.1093/nar/gky427>.
- (29) Roe, D. R.; Cheatham, T. E. PTRAJ and CPPTRAJ: Software for Processing and Analysis of Molecular Dynamics Trajectory Data. *J. Chem. Theory Comput.* **2013**, *9* (7), 3084–3095. <https://doi.org/10.1021/ct400341p>.
- (30) Richter, F.; Leaver-Fay, A.; Khare, S. D.; Bjelic, S.; Baker, D. De Novo Enzyme Design Using Rosetta3. *PLoS One* **2011**, *6* (5), 1–12. <https://doi.org/10.1371/journal.pone.0019230>.
- (31) Case, D. A.; Ben-Shalom, I. Y.; Brozell, S. R.; Cerutti, D. S.; T.E. Cheatham, I.; Cruzeiro, V. W. D.; Darden, T. A.; Duke, R. E.; Ghoreishi, D.; Gilson, M. K.; Gohlke, H.; Goetz, A. W.; Greene, D.; Harris, R.; Homeyer, N.; Huang, Y.; Izadi, S.; Kovalenko, A.; Kurtzman, T.; Lee, T. S.; LeGrand, S.; Li, P.; Lin, C.; Liu, J.; Luchko, T.; Luo, R.; Mermelstein, D. J.; Merz, K. M.; Miao, Y.; Monard, G.; Nguyen, C.; Nguyen, H.;

- Omelyan, I.; Onufriev, A.; Pan, F.; Qi, R.; Roe, D. R.; Roitberg, A.; Sagui, C.; Schott-Verdugo; Shen, S.; Simmerling, J. C. L.; Smith, J.; SalomonFerrer, R.; Swails, J.; Walker, R. C.; Wang, J.; Wei, H.; Wolf, R. M.; Wu, X.; Xiao, L.; York, D. M.; Kollman, P. A. AMBER 2018. University of California, San Francisco.
- (32) Cruzeiro, V. W. D.; Amaral, M. S.; Roitberg, A. E. Redox Potential Replica Exchange Molecular Dynamics at Constant PH in AMBER: Implementation and Validation. *J. Chem. Phys.* **2018**, *149* (7), 072338. <https://doi.org/10.1063/1.5027379>.
- (33) Shahrokh, K.; Orendt, A.; Yost, G. S.; Cheatham, T. E. Quantum Mechanically Derived AMBER-Compatible Heme Parameters for Various States of the Cytochrome P450 Catalytic Cycle. *J. Comput. Chem.* **2012**, *33* (2), 119–133. <https://doi.org/10.1002/jcc.21922>.
- (34) Jorgensen, W. L.; Chandrasekhar, J.; Madura, J. D.; Impey, R. W.; Klein, M. L. Comparison of Simple Potential Functions for Simulating Liquid Water. *J. Chem. Phys.* **1998**, *79* (2), 926. <https://doi.org/10.1063/1.445869>.
- (35) Maier, J. A.; Martinez, C.; Kasavajhala, K.; Wickstrom, L.; Hauser, K. E.; Simmerling, C. Ff14SB: Improving the Accuracy of Protein Side Chain and Backbone Parameters from Ff99SB. *J. Chem. Theory Comput.* **2015**, *11* (8), 3696–3713. <https://doi.org/10.1021/acs.jctc.5b00255>.
- (36) Darden, T.; York, D.; Pedersen, L. Particle Mesh Ewald: An N·log(N) Method for Ewald Sums in Large Systems. *J. Chem. Phys.* **1998**, *98* (12), 10089. <https://doi.org/10.1063/1.464397>.
- (37) Wagner, J. R.; Sørensen, J.; Hensley, N.; Wong, C.; Zhu, C.; Perison, T.; Amaro, R. E. POVME 3.0: Software for Mapping Binding Pocket Flexibility. *J. Chem. Theory Comput.* **2017**, *13* (9), 4584–4592. <https://doi.org/10.1021/acs.jctc.7b00500>.
- (38) Humphrey, W.; Dalke, A.; Schulten, K. VMD: Visual Molecular Dynamics. *J. Mol. Graph.* **1996**, *14* (1), 33–38. [https://doi.org/10.1016/0263-7855\(96\)00018-5](https://doi.org/10.1016/0263-7855(96)00018-5).
- (39) Li, P.; Merz, K. M. MCPB.Py: A Python Based Metal Center Parameter Builder. *J. Chem. Inf. Model.* **2016**, *56* (4), 599–604. <https://doi.org/10.1021/acs.jcim.5b00674>.
- (40) Wang, J.; Wolf, R. M.; Caldwell, J. W.; Kollman, P. A.; Case, D. A. Development and Testing of a General Amber Force Field. *J. Comput. Chem.* **2004**, *25* (9), 1157–1174. <https://doi.org/10.1002/jcc.20035>.
- (41) Bayly, C. I.; Cieplak, P.; Cornell, W.; Kollman, P. A. A Well-Behaved Electrostatic Potential Based Method Using Charge Restraints for Deriving Atomic Charges: The RESP Model. *J. Phys. Chem.* **1993**, *97* (40), 10269–10280. <https://doi.org/10.1021/j100142a004>.
- (42) Besler, B. H.; Merz, K. M.; Kollman, P. A. Atomic Charges Derived from Semiempirical Methods. *J. Comput. Chem.* **1990**, *11* (4), 431–439. <https://doi.org/10.1002/jcc.540110404>.
- (43) Singh, U. C.; Kollman, P. A. An Approach to Computing Electrostatic Charges for Molecules. *J. Comput. Chem.* **1984**, *5* (2), 129–145. <https://doi.org/10.1002/jcc.540050204>.
- (44) Trott, O.; Olson, A. J. AutoDock Vina: Improving the Speed and Accuracy of Docking with a New Scoring Function, Efficient Optimization, and Multithreading. *J. Comput. Chem.* **2009**, *31* (2), NA-NA. <https://doi.org/10.1002/jcc.21334>.
- (45) Li, P.; Merz, K. M. MCPB.Py: A Python Based Metal Center Parameter Builder. *J. Chem. Inf. Model.* **2016**, *56* (4), 599–604. <https://doi.org/10.1021/acs.jcim.5b00674>.
- (46) Dapprich, S.; Komáromi, I.; Byun, K. S.; Morokuma, K.; Frisch, M. J. A New ONIOM Implementation in Gaussian98. Part I. The Calculation of Energies, Gradients, Vibrational Frequencies and Electric Field Derivatives. *J. Mol. Struct. THEOCHEM* **1999**, *461–462*, 1–21. [https://doi.org/10.1016/S0166-1280\(98\)00475-8](https://doi.org/10.1016/S0166-1280(98)00475-8).
- (47) Vreven, T.; Byun, K. S.; Komáromi, I.; Dapprich, S.; John A. Montgomery, J.;

- Morokuma, K.; Frisch, M. J. Combining Quantum Mechanics Methods with Molecular Mechanics Methods in ONIOM. *J. Chem. Theory Comput.* **2006**, *2*, 815–826. <https://doi.org/10.2223/jped.1687>.
- (48) Vreven, T.; Morokuma, K.; Farkas, Ö.; Schlegel, H. B.; Frisch, M. J. Geometry Optimization with QM/MM, ONIOM, and Other Combined Methods. I. Microiterations and Constraints. *J. Comput. Chem.* **2003**, *24* (6), 760–769. <https://doi.org/10.1002/jcc.10156>.
- (49) S. Fernandes, H.; Ramos, M. J.; M. F. S. A. Cerqueira, N. MolUP: A VMD Plugin to Handle QM and ONIOM Calculations Using the Gaussian Software. *J. Comput. Chem.* **2018**, *39* (19), 1344–1353. <https://doi.org/10.1002/jcc.25189>.
- (50) Stuyver, T.; Huang, J.; Mallick, D.; Danovich, D.; Shaik, S. TITAN: A Code for Modeling and Generating Electric Fields—Features and Applications to Enzymatic Reactivity. *J. Comput. Chem.* **2020**, *41* (1), 74–82. <https://doi.org/10.1002/jcc.26072>.
- (51) Bim, D.; Alexandrova, A. N. Local Electric Fields As a Natural Switch of Heme-Iron Protein Reactivity. *ACS Catal.* **2021**, *11*, 6534–6546. <https://doi.org/10.1021/acscatal.1c00687>.
- (52) Shaik, S.; Ramanan, R.; Danovich, D.; Mandal, D. Structure and Reactivity/Selectivity Control by Oriented-External Electric Fields. *Chem. Soc. Rev.* **2018**, *47* (14), 5125–5145. <https://doi.org/10.1039/c8cs00354h>.
- (53) Carpenter, B. K. Dynamic Behavior of Organic Reactive Intermediates. *Angew. Chemie Int. Ed.* **1998**, *37*, 3340–3350. [https://doi.org/10.1002/\(sici\)1521-3773\(19981231\)37:24<3340::aid-anie3340>3.0.co;2-1](https://doi.org/10.1002/(sici)1521-3773(19981231)37:24<3340::aid-anie3340>3.0.co;2-1).
- (54) Carpenter, B. K. Energy Disposition in Reactive Intermediates. *Chemical Reviews*. 2013, pp 7265–7286. <https://doi.org/10.1021/cr300511u>.
- (55) López, J. G.; Vayner, G.; Lourderaj, U.; Addepalli, S. V.; Kato, S.; DeJong, W. A.; Windus, T. L.; Hase, W. L. A Direct Dynamics Trajectory Study of F- + CH<sub>3</sub>OOH Reactive Collisions Reveals a Major Non-IRC Reaction Path. *J. Am. Chem. Soc.* **2007**, *129* (32), 9976–9985. <https://doi.org/10.1021/ja0717360>.
- (56) Biswas, B.; Singleton, D. A. Controlling Selectivity by Controlling the Path of Trajectories. *J. Am. Chem. Soc.* **2015**, *137* (45), 14244–14247. <https://doi.org/10.1021/jacs.5b08635>.
- (57) Ess, D. H.; Wheeler, S. E.; Iafe, R. G.; Xu, L.; Çelebi-Ölçüm, N.; Houk, K. N. Bifurcations on Potential Energy Surfaces of Organic Reactions. *Angew. Chem. Int. Ed.* **2008**, *47* (40), 7592–7601. <https://doi.org/10.1002/anie.200800918>.
- (58) Hare, S. R.; Tantillo, D. J. Post-Transition State Bifurcations Gain Momentum-Current State of the Field. *Pure Appl. Chem.* **2017**, *89* (6), 679–698. <https://doi.org/10.1515/pac-2017-0104>.
- (59) Carlsen, R.; Wohlgemuth, N.; Carlson, L.; Ess, D. H. Dynamical Mechanism May Avoid High-Oxidation State Ir(V)-H Intermediate and Coordination Complex in Alkane and Arene C-H Activation by Cationic Ir(III) Phosphine. *J. Am. Chem. Soc.* **2018**, *140* (35), 11039–11045. <https://doi.org/10.1021/jacs.8b05238>.
- (60) Rowley, C. N.; Woo, T. K. A Path Sampling Study of Ru-Hydride-Catalyzed H<sub>2</sub> Hydrogenation of Ethylene. *J. Am. Chem. Soc.* **2008**, *130* (23), 7218–7219. <https://doi.org/10.1021/ja802219a>.
- (61) Hare, S. R.; Tantillo, D. J. Cryptic Post-Transition State Bifurcations That Reduce the Efficiency of Lactone-Forming Rh-Carbenoid C-H Insertions. *Chem. Sci.* **2017**, *8* (2), 1442–1449. <https://doi.org/10.1039/c6sc03745c>.
- (62) Ye, L.; Wang, Y.; Aue, D. H.; Zhang, L. Experimental and Computational Evidence for Gold Vinylidenes: Generation from Terminal Alkynes via a Bifurcation Pathway and Facile C-H Insertions. *J. Am. Chem. Soc.* **2012**, *134* (1), 31–34. <https://doi.org/10.1021/ja2091992>.

- (63) Zhang, L.; Wang, Y.; Yao, Z. J.; Wang, S.; Yu, Z. X. Kinetic or Dynamic Control on a Bifurcating Potential Energy Surface? An Experimental and DFT Study of Gold-Catalyzed Ring Expansion and Spirocyclization of 2-Propargyl- $\beta$ -Tetrahydrocarbolines. *J. Am. Chem. Soc.* **2015**, *137* (41), 13290–13300. <https://doi.org/10.1021/jacs.5b05971>.
- (64) Noey, E. L.; Wang, X.; Houk, K. N. Selective Gold(I)-Catalyzed Formation of Tetracyclic Indolines: A Single Transition Structure and Bifurcations Lead to Multiple Products. *J. Org. Chem.* **2011**, *76* (9), 3477–3483. <https://doi.org/10.1021/jo200556f>.
- (65) Yang, B.; Schouten, A.; Ess, D. H. Direct Dynamics Trajectories Reveal Nonstatistical Coordination Intermediates and Demonstrate That  $\sigma$  and  $\pi$ -Coordination Are Not Required for Rhenium(I)-Mediated Ethylene C-H Activation. *J. Am. Chem. Soc.* **2021**, *143* (22), 8367–8374. <https://doi.org/10.1021/jacs.1c01709>.
- (66) Teynor, M. S.; Scott, W.; Ess, D. H. Catalysis with a Skip: Dynamically Coupled Addition, Proton Transfer, and Elimination during Au- and Pd-Catalyzed Diol Cyclizations. *ACS Catal.* **2021**, *11* (16), 10179–10189. <https://doi.org/10.1021/acscatal.1c02408>.
- (67) Ess, D. H. Quasiclassical Direct Dynamics Trajectory Simulations of Organometallic Reactions. *Acc. Chem. Res.* **2021**, *54* (23), 4410–4422. <https://doi.org/10.1021/acs.accounts.1c00575>.
- (68) Wang, J.-C.; Sakakibara, M.; Liu, J.-Q.; Dairi, T.; Itoh, N. Cloning, Sequence Analysis, and Expression in Escherichia Coli of the Gene Encoding Phenylacetaldehyde Reductase from Styrene-Assimilating Corynebacterium Sp. Strain ST-10. *Appl. Microbiol. Biotechnol.* **1999**, *52* (3), 386–392. <https://doi.org/10.1007/s002530051536>.
- (69) Hammer, S. C.; Kubik, G.; Watkins, E.; Huang, S.; Mingos, H.; Arnold, F. H. Anti-Markovnikov Alkene Oxidation by Metal-Oxo-Mediated Enzyme Catalysis. *Science* **2017**, *358* (6360), 215–218. <https://doi.org/10.1126/science.aao1482>.
- (70) Guengerich, F. P.; Martin, M. V.; Sohl, C. D.; Cheng, Q. Measurement of Cytochrome P450 and NADPH-Cytochrome P450 Reductase. *Nat. Protoc.* **2009**, *4* (9), 1245–1251. <https://doi.org/10.1038/nprot.2009.121>.
- (71) Wei, Y.; Tinoco, A.; Steck, V.; Fasan, R.; Zhang, Y. Cyclopropanations via Heme Carbenes: Basic Mechanism and Effects of Carbene Substituent, Protein Axial Ligand, and Porphyrin Substitution. *J. Am. Chem. Soc.* **2018**, *140* (5), 1649–1662. <https://doi.org/10.1021/jacs.7b09171>.
- (72) Ball, L. T.; Lloyd-Jones, G. C.; Russell, C. A. Gold-Catalysed Oxyarylation of Styrenes and Mono- and Gem-Disubstituted Olefins Facilitated by an Iodine(III) Oxidant. *Chem. Eur. J* **2012**, *18* (10), 2931–2937. <https://doi.org/10.1002/chem.201103061>.
- (73) Hesse, M.; Meier, H.; Zeeh, B. *Spektroskopische Methoden in Der Organischen Chemie*; Georg Thieme Verlag: Stuttgart, 2012.
- (74) Oba, M. A Convenient Method for Palladium-Catalyzed Reductive Deuteration of Organic Substrates Using Deuterated Hypophosphite in D<sub>2</sub>O. *J. Label. Compd. Radiopharm.* **2015**, *58* (5), 215–219. <https://doi.org/10.1002/jlcr.3277>.
- (75) Mandrelli, F.; Blond, A.; James, T.; Kim, H.; List, B. Deracemizing A-branched Carboxylic Acids by Catalytic Asymmetric Protonation of Bis-silyl Ketene Acetals with Water or Methanol. *Angew. Chem. Int. Ed.* **2019**, *58* (33), 11479–11482. <https://doi.org/10.1002/anie.201905623>.
- (76) Matoishi, K.; Hanzawa, S.; Kakidani, H.; Suzuki, M.; Sugai, T.; Ohta, H. The First Synthesis of Both Enantiomers of [ $\alpha$ -<sup>2</sup>H]Phenylacetic Acid in High Enantiomeric Excess. *Chem. Commun.* **2000**, 1519–1520. <https://doi.org/10.1039/b003941l>.
- (77) Hoye, T. R.; Jeffrey, C. S.; Shao, F. Mosher Ester Analysis for the Determination of Absolute Configuration of Stereogenic (Chiral) Carbinol Carbons. *Nat. Protoc.* **2007**, *2* (10), 2451–2458. <https://doi.org/10.1038/nprot.2007.354>.
